# Supplementary material for: Reconstruction of a catalogue of genome-scale metabolic models with enzymatic constraints using GECKO 2.0
Source: Research Square preprint supplement (doi:10.21203/rs.3.rs-351350/v1), 2021-04-01
Supplement: Supplementary file 2 [file 6f4ecd0adc7bec91610dd367.xlsx]

## Sheet: summary
Low growth rate
max flux [mmol/gDw h]	mean flux [mmol/gDw h]	median flux [mmol/gDw h]	std deviation in flux distribution	Totally variable fluxes	total number flux-carrying reactions	Percentage of fluxes with variability reduction >= 95%	model
2000	672.478	611.974	461.95	56	1539		Eco_batch
2000	18.6314	0.000695423	185.721	0	1539	0.927225	ec_Eco_batch
2000	718.341	584.75	554.746	85	1069		yli_batch
30.6862	0.127962	0.000622231	1.64272	0	1069	0.96913	ec_yli_batch
2000	780.612	817.651	609.494	116	963		Kmx_batch
8.34774	0.0614127	0.00117945	0.480737	0	963	0.951194	ec_Kmx_batch
High growth rate
max flux [mmol/gDw h]	mean flux [mmol/gDw h]	median flux [mmol/gDw h]	std deviation in flux distribution	Totally variable fluxes	total number flux-carrying reactions	Percentage of fluxes with variability reduction >= 95%	model
2000	30.5317	0.00764642	191.563	6	1534		Eco_chemostat
2000	18.9106	0.00081889	186.973	13	1534	0.0391134	ec_Eco_chemostat
2000	164.566	1.02404	510.562	67	1075		yli_chemostat
589.891	2.35043	0.0019614	27.6339	0	1075	0.917209	ec_yli_chemostat
2000	277.28	0.00151364	620.921	89	963		Kmx_chemostat
2000	26.4781	0.00150991	148.651	2	963	0.142264	ec_Kmx_chemostat

## Sheet: Ecoli_batch
rxns	rxnNames	GEM flux variability ranges [mmol/gDw h]	ecModel flux variability ranges [mmol/gDw h]	log10FC	rel_diff
'EX_acgam_e'	'N-Acetyl-D-glucosamine exchange'	999.976	0.00759235	-5.11961	-0.999992
'EX_cellb_e'	'Cellobiose exchange'	2.56174e-08	1.28087e-08	-0.30103	-0.5
'EX_pi_e'	'Phosphate exchange'	1000	0.062254	-4.20583	-0.999938
'EX_h_e'	'H+ exchange'	578.774	0.190886	-3.48174	-0.99967
'EX_ade_e'	'Adenine exchange'	1000	0.00109758	-5.95956	-0.999999
'EX_4abut_e'	'4-Aminobutanoate exchange'	1000	0.00109758	-5.95956	-0.999999
'EX_ac_e'	'Acetate exchange'	1000	0.00105496	-5.97676	-0.999999
'EX_akg_e'	'2-Oxoglutarate exchange'	1000	2.45363e-06	-8.61019	-1
'EX_ala__L_e'	'L-Alanine exchange'	1000	0.000710403	-6.1485	-0.999999
'EX_arg__L_e'	'L-Arginine exchange'	1000	0.0138089	-4.85984	-0.999986
'EX_fum_e'	'Fumarate exchange'	524.241	0.00281519	-5.27002	-0.999995
'EX_glu__L_e'	'L-Glutamate exchange'	250.825	0.00497511	-4.70257	-0.99998
'EX_gua_e'	'Guanine exchange'	999.873	0.00101217	-5.99469	-0.999999
'EX_met__L_e'	'L-Methionine exchange'	1000	0.00872548	-5.05921	-0.999991
'EX_crn_e'	'L-Carnitine exchange'	88.3898	3.47905e-05	-6.40494	-1
'EX_fe3_e'	'Fe3+ exchange'	176.78	6.95811e-05	-6.40494	-1
'EX_glcn_e'	'D-Gluconate exchange'	1000	0.00520032	-5.28397	-0.999995
'EX_gln__L_e'	'L-Glutamine exchange'	1000	0.00520032	-5.28397	-0.999995
'EX_glyc_e'	'Glycerol exchange'	88.3898	3.47905e-05	-6.40494	-1
'EX_man_e'	'D-Mannose exchange'	274.288	1998.89	0.862583	6.28758
'EX_mn2_e'	'Mn2+ exchange'	2000	1865.82	-0.0301602	-0.0670898
'EX_rib__D_e'	'D-Ribose exchange'	3.19356e-08	1.55858e-08	-0.311544	-0.51196
'EX_sbt__D_e'	'D-Sorbitol exchange'	3.19356e-08	1.55858e-08	-0.311544	-0.51196
'EX_ura_e'	'Uracil exchange'	47.7626	7.52113e-06	-6.8028	-1
'EX_val__L_e'	'L-Valine exchange'	47.7626	7.52113e-06	-6.8028	-1
'EX_xan_e'	'Xanthine exchange'	267.37	0.000630671	-5.62731	-0.999998
'EX_thymd_e'	'Thymidine exchange'	999.698	0.000884473	-6.05318	-0.999999
'EX_tyr__L_e'	'L-Tyrosine exchange'	263.062	0.000260938	-6.00352	-0.999999
'EX_btn_e'	'Biotin exchange'	998.349	0.000382363	-6.41681	-1
'EX_ptrc_e'	'Putrescine exchange'	577.942	0.000109341	-6.7231	-1
'EX_spmd_e'	'Spermidine exchange'	382.101	6.01701e-05	-6.8028	-1
'EX_thym_e'	'Thymine exchange'	0.0001281	2.08114e-06	-1.78925	-0.983754
'EX_fe2_e'	'Fe2+ exchange'	1000	0.0279876	-4.55303	-0.999972
'EX_glc__D_e'	'D-Glucose exchange'	1000	5.39014e-06	-8.2684	-1
'EX_alltn_e'	'Allantoin exchange'	1000	5.39014e-06	-8.2684	-1
'EX_dgsn_e'	'Deoxyguanosine exchange'	998.209	0.00359637	-5.44336	-0.999996
'EX_arab__L_e'	'L-Arabinose exchange'	998.209	0.00369762	-5.4313	-0.999996
'EX_fru_e'	'D-Fructose exchange'	1998.08	0.00676649	-5.47025	-0.999997
'EX_gal_e'	'D-Galactose exchange'	578.584	0.000903398	-5.80649	-0.999998
'EX_xyl__D_e'	'D-Xylose exchange'	578.584	0.000903398	-5.80649	-0.999998
'EX_for_e'	'Formate exchange'	999.382	0.000869467	-6.06048	-0.999999
'EX_gly_e'	'Glycine exchange'	2000	0.0693135	-4.46021	-0.999965
'EX_lys__L_e'	'L-Lysine exchange'	998.209	0.0459415	-4.33702	-0.999954
'EX_ser__L_e'	'L-Serine exchange'	1000	0.011509	-4.93896	-0.999988
'EX_thm_e'	'Thiamin exchange'	1000	0.0188153	-4.72549	-0.999981
'EX_trp__L_e'	'L-Tryptophan exchange'	999.976	0.0105217	-4.9779	-0.999989
'EX_din_e'	'Deoxyinosine exchange'	1999.42	0.0121716	-5.21556	-0.999994
'EX_acald_e'	'Acetaldehyde exchange'	1000	0.0297405	-4.52665	-0.99997
'EX_sucr_e'	'Sucrose exchange'	998.318	0.0804396	-4.0938	-0.999919
'EX_tre_e'	'Trehalose exchange'	1000	0.0111459	-4.95289	-0.999989
'EX_zn2_e'	'Zinc exchange'	998.209	0.0104759	-4.97903	-0.99999
'DNMPPA'	'Dihydroneopterin monophosphate dephosphorylase'	1000	1.7585	-2.75486	-0.998242
'HEX4'	'Hexokinase (D-mannose:ATP)'	55.9771	1.71056e-05	-6.51487	-1
'URIC'	'Uricase'	524.241	0.00281519	-5.27002	-0.999995
'EX_tmao_e'	'Trimethylamine N-oxide exchange'	437.978	0.00123359	-5.55028	-0.999997
'EX_26dap__M_e'	'Meso-2,6-Diaminoheptanedioate exchange'	671.096	0.00636801	-5.02278	-0.999991
'EX_acnam_e'	'N-Acetylneuraminate exchange'	250.825	0.00497511	-4.70257	-0.99998
'EX_amp_e'	'AMP exchange'	191.61	0	-17.2824	-1
'EX_dha_e'	'Dihydroxyacetone exchange'	191.61	0.00058634	-5.51427	-0.999997
'EX_fuc__L_e'	'L-Fucose exchange'	250.825	0.00497511	-4.70257	-0.99998
'EX_rmn_e'	'L-Rhamnose exchange'	191.61	0.00058634	-5.51427	-0.999997
'EX_glyclt_e'	'Glycolate exchange'	1999.99	0.0239741	-4.92129	-0.999988
'EX_indole_e'	'Indole exchange'	7.93794e-08	2000	10.4013	2.51954e+10
'EX_galur_e'	'D-Galacturonate exchange'	545.278	7.39956e-05	-6.86741	-1
'EX_but_e'	'Butyrate (n-C4:0) exchange'	1824.08	0.151966	-4.0793	-0.999917
'EX_cbl1_e'	'Cob(I)alamin exchange'	2000	0.0116244	-5.23566	-0.999994
'EX_gbbtn_e'	'Gamma-butyrobetaine exchange'	1000	0.0219836	-4.6579	-0.999978
'EX_malttr_e'	'Maltotriose exchange'	2000	0.229642	-3.93998	-0.999885
'EX_hdcea_e'	'Hexadecenoate (n-C16:1) exchange'	1490.92	0.185826	-3.90435	-0.999875
'AOBUTDs'	'L-2-amino-3-oxobutanoate decarboxylation (spontaneous)'	1000	0.17148	-3.76579	-0.999829
'EX_nmn_e'	'NMN exchange'	1666.22	0.0368302	-4.65553	-0.999978
'EX_urea_e'	'Urea exchange'	1412	0.0146644	-4.98357	-0.99999
'EX_f6p_e'	'D-fructose 6-phosphate exchange'	911.893	0.0168622	-4.73303	-0.999982
'EX_lac__D_e'	'D-lactate exchange'	999.101	0.00144008	-5.84122	-0.999999
'EX_ttdcea_e'	'Tetradecenoate (n-C14:1) exchange'	1000	1.32493	-2.87781	-0.998675
'EX_h2s_e'	'Hydrogen sulfide exchange'	1000	0.165692	-3.7807	-0.999834
'EX_maltpt_e'	'Maltopentaose exchange'	49.4264	2.9072e-05	-6.23048	-0.999999
'EX_glcur_e'	'D-Glucuronate exchange'	998.209	0.00394488	-5.40319	-0.999996
'EX_mmet_e'	'S-Methyl-L-methionine exchange'	998.209	0.00394488	-5.40319	-0.999996
'EX_mg2_e'	'Mg exchange'	998.209	0.00328739	-5.48237	-0.999997
'G5SADs'	'L-glutamate 5-semialdehyde dehydratase (spontaneous)'	1998.21	0.0146445	-5.13497	-0.999993
'H2SO'	'Hydrogen sulfide oxidation'	1998.22	0.0124072	-5.20697	-0.999994
'EX_acac_e'	'Acetoacetate exchange'	1267.17	0.0124072	-5.00916	-0.99999
'EX_adn_e'	'Adenosine exchange'	700.56	0.000196399	-6.55231	-1
'EX_ins_e'	'Inosine exchange'	999.858	0.000711514	-6.14775	-0.999999
'EX_glyc3p_e'	'Glycerol 3-phosphate exchange'	1159.4	0.00187828	-5.79047	-0.999998
'EX_lcts_e'	'Lactose exchange'	999.86	0.0245723	-4.60949	-0.999975
'EX_nac_e'	'Nicotinate exchange'	1000	0.0254874	-4.59367	-0.999975
'EX_ocdca_e'	'Octadecanoate (n-C18:0) exchange'	999.798	0.0294079	-4.53145	-0.999971
'FTHFLi'	'Formate-tetrahydrofolate ligase'	1000	0.251406	-3.59962	-0.999749
'EX_dad_2_e'	'Deoxyadenosine exchange'	88.3898	3.47905e-05	-6.40494	-1
'EX_ser__D_e'	'D-Serine exchange'	437.978	0.00123359	-5.55028	-0.999997
'EX_gam6p_e'	'D-Glucosamine 6-phosphate exchange'	1999.42	0.0163573	-5.08719	-0.999992
'EX_15dap_e'	'1,5-Diaminopentane exchange'	578.584	0.000903398	-5.80649	-0.999998
'EX_ocdcea_e'	'Octadecenoate (n-C18:1) exchange'	176.78	6.95811e-05	-6.40494	-1
'EX_cynt_e'	'Cyanate exchange'	437.978	0.00123359	-5.55028	-0.999997
'EX_galctn__D_e'	'D-Galactonate exchange'	1000	0.0222148	-4.65336	-0.999978
'EX_glyb_e'	'Glycine betaine exchange'	1000	0.00691779	-5.16003	-0.999993
'NMNt7pp'	'NMN transport via NMN glycohydrolase (periplasm)'	1000	0.0268421	-4.57118	-0.999973
'GLUtex'	'L-glutamate transport via diffusion (extracellular to periplasm)'	1000	0.0268421	-4.57118	-0.999973
'GLYALDtex'	'Glyceraldehyde transport via diffusion (extracellular to periplasm)'	2000	0.161138	-4.09383	-0.999919
'GLYBtex'	'Glycine betaine transport via diffusion (extracellular to periplasm)'	2000	0.176162	-4.05512	-0.999912
'12PPDStex'	'(S)-Propane-1,2-diol transport via diffusion (extracellular to periplasm)'	6.31819e-09	1.8656e-09	-0.529773	-0.704725
'DDGLCNtex'	'2-dehydro-3-deoxy-D-gluconate transport via diffusion (extracellular to periplasm)'	27.9886	8.55264e-06	-6.51488	-1
'26DAHtex'	'Meso-2,6-Diaminoheptanedioate transport via diffusion (extracellular to periplasm)'	27.9886	8.55264e-06	-6.51488	-1
'HCINNMtex'	'3-hydroxycinnamic acid transport via diffusion (extracellular to periplasm)'	27.9886	8.55264e-06	-6.51488	-1
'SUCCt2_2pp'	'Succinate transport via proton symport (2 H) (periplasm)'	998.209	0.00387276	-5.4112	-0.999996
'SUCFUMtpp'	'Succinate:fumarate antiporter (periplasm)'	998.209	0.0039003	-5.40812	-0.999996
'TARTRt7pp'	'Tartrate/succinate antiporter (periplasm)'	998.209	0.00245551	-5.60908	-0.999998
'THMDt2pp_copy1'	''	998.209	0.00283964	-5.54596	-0.999997
'EX_ca2_e'	'Calcium exchange'	524.241	0.00281519	-5.27002	-0.999995
'EX_so3_e'	'Sulfite exchange'	252.774	0.0002092	-6.08217	-0.999999
'Kt2pp'	'Potassium transport in via proton symport (periplasm)'	252.774	0.0002092	-6.08217	-0.999999
'AKGt2rpp'	'2-oxoglutarate reversible transport via symport (periplasm)'	1999.99	0.0331983	-4.77991	-0.999983
'XYLt2pp'	'D-xylose transport in via proton symport (periplasm)'	1998.21	0.00694156	-5.45918	-0.999997
'EX_ascb__L_e'	'L-Ascorbate exchange'	998.318	0.00107682	-5.96712	-0.999999
'EX_ala_B_e'	'Beta-Alanine exchange'	1998.21	0.00784936	-5.40581	-0.999996
'EX_agm_e'	'Agmatine exchange'	1000	0.00367687	-5.43452	-0.999996
'EX_minohp_e'	'Myo-Inositol hexakisphosphate exchange'	999.116	0.00367693	-5.43413	-0.999996
'EX_ppt_e'	'Phosphonate exchange'	998.209	0.00367693	-5.43374	-0.999996
'EX_hxa_e'	'Hexanoate (n-C6:0) exchange'	267.37	0.000630671	-5.62731	-0.999998
'EX_lyx__L_e'	'L-Lyxose exchange'	1000	0.00452893	-5.344	-0.999995
'EX_acmum_e'	'N-Acetylmuramate exchange'	7.74269e-08	3.77942e-08	-0.311466	-0.511872
'EX_dca_e'	'Decanoate (n-C10:0) exchange'	1000	0.000542874	-6.2653	-0.999999
'EX_all__D_e'	'D-Allose exchange'	993.353	2.52863	-2.59422	-0.997454
'EX_octa_e'	'Octanoate (n-C8:0) exchange'	1000	0.17148	-3.76579	-0.999829
'EX_xylu__L_e'	'L-Xylulose exchange'	250.825	0.00497511	-4.70257	-0.99998
'EX_gdp_e'	'GDP exchange'	2000	0.0207425	-4.98417	-0.99999
'EX_gtp_e'	'GTP exchange'	1998.32	0.0103804	-5.28445	-0.999995
'THRabcpp'	'L-threonine transport via ABC system (periplasm)'	1998.07	0.00608553	-5.51631	-0.999997
'TYRt2rpp'	'L-tyrosine reversible transport via proton symport (periplasm)'	671.096	0.00636801	-5.02278	-0.999991
'URIt2pp_copy1'	''	524.241	0.00281519	-5.27002	-0.999995
'XTSNt2rpp'	'Xanthosine transport via proton symport (periplasm)'	1000	0.00511341	-5.29129	-0.999995
'XYLUt2pp'	'L-xylulose transport in via proton symport (periplasm)'	1000	0.0266989	-4.57351	-0.999973
'THRt4pp'	'L-threonine via sodium symport (periplasm)'	1000	5.00266	-2.3008	-0.994997
'EX_fruur_e'	'D-Fructuronate exchange'	2000	6.14948	-2.51219	-0.996925
'GALtex'	'D-galactose transport via diffusion (extracellular to periplasm)'	2000	0.144577	-4.14093	-0.999928
'GALCTtex'	'D-galactarte transport via diffusion (extracellular to periplasm)'	1000	0.000250144	-6.60181	-1
'GALCTNtex'	'D-galactonate transport via diffusion (extracellular to periplasm)'	1000	0.00872548	-5.05921	-0.999991
'GALTtex'	'Galactitol transport via diffusion (extracellular to periplasm)'	0.000384299	0.000384236	-7.07952e-05	-0.000162999
'ASPt2_2pp'	'Aspartate transport via proton symport (2 H) (periplasm)'	382.101	6.01701e-05	-6.8028	-1
'ASPt2_3pp'	'L-asparate transport via proton symport (3 H) (periplasm)'	998.209	0.0104759	-4.97903	-0.99999
'HIStex'	'L-histidine transport via diffusion (extracellular to periplasm)'	998.209	0.0205695	-4.686	-0.999979
'INSTtex'	'Inositol transport via diffusion (extracellular to periplasm)'	139.252	4.85084e-05	-6.45799	-1
'INStex'	'Inosine transport via diffusion (extracellular to periplasm)'	390.749	2.53681e-05	-7.18761	-1
'D_LACtex'	'D-lactate transport via diffusion (extracellular to periplasm)'	503.148	0.000159309	-6.49945	-1
'FRULYStex'	'Fructoselysine transporter via diffusion (extracellular)'	736.434	0.000244987	-6.47799	-1
'EX_fad_e'	'Exchange of Flavin adenine dinucleotide oxidized'	139.252	4.85084e-05	-6.45799	-1
'GALCTt2rpp'	'D-galactarte transport via proton symport, reversible (periplasm)'	382.101	6.01701e-05	-6.8028	-1
'GALt2pp'	'D-galactose transport in via proton symport (periplasm)'	55.9771	1.71056e-05	-6.51487	-1
'ASPtex'	'L-aspartate transport via diffusion (extracellular to periplasm)'	1000	0.0251068	-4.60021	-0.999975
'EX_fe3dcit_e'	'Fe(III)dicitrate exchange'	548.888	0.000471959	-6.06558	-0.999999
'EX_fe3hox_e'	'Fe(III)hydroxamate exchange'	548.888	0.000471959	-6.06558	-0.999999
'EX_fecrm_e'	'Ferrichrome exchange'	274.444	0.000235979	-6.06558	-0.999999
'EX_feenter_e'	'Fe-enterobactin exchange'	232.222	0.000125601	-6.26691	-0.999999
'EX_feoxam_e'	'Ferroxamine exchange'	51.0855	2.2132e-05	-6.36328	-1
'EX_cpgn_e'	'Coprogen exchange'	999.698	5.87796e-05	-7.23064	-1
'EX_adocbl_e'	'Adenosylcobalamin exchange'	0	0	0	0
'INDOLEtex'	'Indole transport via diffusion (extracellular to periplasm)'	1000	0.000767115	-6.11514	-0.999999
'ADEt2rpp'	'Adenine transport via proton symport (reversible) (periplasm)'	3.91727e-08	2000	10.708	5.10559e+10
'ADNt2pp_copy1'	''	686.401	0.000167365	-6.61291	-1
'ALAabcpp'	'L-alanine transport via ABC system (periplasm)'	7.68521e-08	3.73708e-08	-0.313123	-0.51373
'ALLTNt2rpp'	'Allantoin transport in via proton symport (periplasm)'	7.68521e-08	3.73708e-08	-0.313123	-0.51373
'GUAtpp'	'Guanine transport via diffusion (periplasm)'	7.74269e-08	3.77942e-08	-0.311466	-0.511872
'HYXNtpp'	'Hypoxanthine transport (periplasm)'	1000	0.173181	-3.7615	-0.999827
'NACtpp'	'Nicotinic acid uptake (periplasm)'	2.74439e-07	1.34056e-07	-0.31116	-0.511528
'CPGNtonex'	'Coprogen transport via ton system (extracellular)'	2.56173e-08	7.49082e-09	-0.534004	-0.707588
'GLCRtex'	'D-glucarate transport via diffusion (extracellular to periplasm)'	0	0	0	0
'GLCNtex'	'D-gluconate transport via diffusion (extracellular to periplasm)'	1846.37	0.00107187	-6.23618	-0.999999
'GLCURtex'	'D-glucuronat transport via diffusion (extracellular to periplasm)'	578.774	0.190886	-3.48174	-0.99967
'GLNtex'	'L-glutamine transport via diffusion (extracellular to periplasm)'	1000	0.0291929	-4.53472	-0.999971
'O2tex'	'Oxygen transport via diffusion (extracellular to periplasm)'	1000	0.00310718	-5.50763	-0.999997
'EX_ppa_e'	'Propionate exchange'	999.382	0.000771792	-6.11223	-0.999999
'OCTAtex'	'Octanoate transport via diffusion (extracellular to periplasm)'	994.281	0.000771792	-6.11001	-0.999999
'ORNtex'	'Ornithine transport via diffusion (extracellular to periplasm)'	998.318	0.0804396	-4.0938	-0.999919
'CITt7pp'	'Citrate transport via succinate antiport (periplasm)'	1000	0.000776891	-6.10964	-0.999999
'CRNt7pp'	'Carnitine/butyrobetaine antiporter (periplasm)'	998.318	0.0896699	-4.04662	-0.99991
'EX_ni2_e'	'Ni2+ exchange'	1000	0.0189895	-4.72149	-0.999981
'EX_no_e'	'Nitric oxide exchange'	671.096	0.00636801	-5.02278	-0.999991
'DGSNt2pp'	'Deoxyguanosine transport in via proton symport (periplasm)'	437.978	0.00123359	-5.55028	-0.999997
'DINSt2pp'	'Deoxyinosine transport in via proton symport (periplasm)'	999.698	7.23505e-05	-7.14043	-1
'DURIt2pp'	'Deoxyuridine transport in via proton symport (periplasm)'	1000	0.0248255	-4.6051	-0.999975
'FE2abcpp'	'Iron (II) transport via ABC system (periplasm)'	1193.89	0.00112879	-6.02435	-0.999999
'FUMt2_2pp'	'Fumarate transport via proton symport (2 H) (periplasm)'	193.892	0.000369993	-5.71937	-0.999998
'FUMt2_3pp'	'Fumarate transport via proton symport (3 H) (periplasm)'	193.892	0.000369993	-5.71937	-0.999998
'CYNTt2pp'	'Cyanate transport via proton symport (periplasm)'	1000	0.0279924	-4.55296	-0.999972
'CYTDt2pp_copy1'	''	1000	0.00107199	-5.96981	-0.999999
'DADNt2pp'	'Deoxyadenosine transport in via proton symport (periplasm)'	1000	0.00452893	-5.344	-0.999995
'DCYTt2pp'	'Deoxycytidine transport in via proton symport (periplasm)'	1000	0.0093036	-5.03135	-0.999991
'RMNtex'	'L-rhamnose transport via diffusion (extracellular to periplasm)'	1000	0.00221434	-5.65476	-0.999998
'EX_meoh_e'	'Methanol exchange'	1000	0.000250144	-6.60181	-1
'MALTTRtexi'	'Maltotriose transport via diffusion (extracellular to periplasm) irreversible'	545.278	7.39956e-05	-6.86741	-1
'MALTTTRtexi'	'MaltotetraoseMaltotriose transport via diffusion (extracellular to periplasm) irreversible'	817.139	0.000888179	-5.9638	-0.999999
'MALTPTtexi'	'MaltopentaoseMaltotriose transport via diffusion (extracellular to periplasm) irreversible'	817.139	0.000888179	-5.9638	-0.999999
'MALTtexi'	'MaltoseMaltotriose transport via diffusion (extracellular to periplasm) irreversible'	367.871	8.02568e-05	-6.66121	-1
'FE3DCITtonex'	'Ferric-dicitrate transport via ton system (extracellular)'	0.0001284	2.08114e-06	-1.79026	-0.983792
'PHEtex'	'L-phenylalanine transport via diffusion (extracellular to periplasm)'	2.74439e-07	1.34056e-07	-0.31116	-0.511528
'PItex'	'Phosphate transport via diffusion (extracellular to periplasm)'	2.74439e-07	1.34056e-07	-0.31116	-0.511528
'CYSabc2pp'	'L-cysteine export via ABC system (cytoplasm to periplasm)'	2000	0.181697	-4.04168	-0.999909
'EX_pheme_e'	'Protoheme exchange'	1000	0.0189895	-4.72149	-0.999981
'PNTOtex'	'Pantothenate transport via diffusion (extracellular to periplasm)'	999.382	0.000798541	-6.09743	-0.999999
'PPPNtex'	'3-phenylpropionate transport via diffusion (extracellular to periplasm)'	998.907	0.00219388	-5.65831	-0.999998
'PPTtex'	'Phosphonate transport via diffusion (extracellular to periplasm)'	999.101	0.00126447	-5.8977	-0.999999
'SERtex'	'L-serine transport via diffusion (extracellular to periplasm)'	998.209	0.00318584	-5.496	-0.999997
'SUCRtex'	'Sucrose transport transport via diffusion (extracellular to periplasm)'	1000	0.0297405	-4.52665	-0.99997
'METtex'	'L-methionine transport via diffusion (extracellular to periplasm)'	1000	0.00221434	-5.65476	-0.999998
'MNLtex'	'Mannitol transport via diffusion (extracellular to periplasm)'	88.3898	3.47905e-05	-6.40494	-1
'NAtex'	'Sodium transport via diffusion (extracellular to periplasm)'	252.774	0.000187063	-6.13075	-0.999999
'NACtex'	'Nicotinic acid transport via diffusion (extracellular to periplasm)'	628.048	0.000262335	-6.37914	-1
'NH4tex'	'Ammonia transport via diffusion (extracellular to periplasm)'	2000	0.163237	-4.08821	-0.999918
'BUTtex'	'Butyrate transport via diffusion (extracellular to periplasm)'	1999.92	0.0341564	-4.76754	-0.999983
'CYTDtex'	'Cytidine transport via diffusion (extracellular to periplasm)'	583.787	0.000399883	-6.16432	-0.999999
'DGSNtex'	'Deoxyguanosine transport via diffusion (extracellular to periplasm)'	199.94	1.16545e-05	-7.2344	-1
'LCTStex'	'Lactose transport via diffusion (extracellular to periplasm)'	27.9886	8.55264e-06	-6.51488	-1
'LEUtex'	'L-leucine transport via diffusion (extracellular to periplasm)'	27.9886	8.55264e-06	-6.51488	-1
'MAN6Ptex'	'Mannose 6-phosphate transport via diffusion (extracellular to periplasm)'	2.61688e-07	1.27528e-07	-0.312176	-0.512669
'MELIBtex'	'Melibiose transport via diffusion (extracellular to periplasm)'	577.942	0.000109341	-6.7231	-1
'DMSOtex'	'Dimethyl sulfoxide transport via diffusion (extracellular to periplasm)'	514.296	0.000132019	-6.59058	-1
'DURItex'	'Deoxyuridine transport via diffusion (extracellular to periplasm)'	998.209	0.000197858	-6.70287	-1
'EX_mal__D_e'	'D-Malate exchange'	431.06	0.00245944	-5.2437	-0.999994
'NMNtex'	'NMN transport via diffusion (extracellular to periplasm)'	1000	0.00359937	-5.44377	-0.999996
'NO2tex'	'Nitrite transport via diffusion (extracellular to periplasm)'	998.209	0	-17.9992	-1
'BUTt2rpp'	'Butyrate transport via proton symport, reversible (periplasm)'	998.209	0.00301997	-5.51922	-0.999997
'CADVtpp'	'Lysine/Cadaverine antiporter (periplasm)'	2000	1.05098	-3.27944	-0.999475
'GDPtex'	'GDP transport via diffusion (extracellular to periplasm)'	2.56174e-08	7.54601e-09	-0.530817	-0.705434
'TYRtex'	'L-tyrosine transport via diffusion (extracellular to periplasm)'	998.209	0.000197858	-6.70287	-1
'URAtex'	'Uracil transport via diffusion (extracellular to periplasm)'	998.209	0.000255883	-6.59118	-1
'UREAtex'	'Urea transport via diffusion (extracellular to periplasm)'	998.209	0.000255883	-6.59118	-1
'EX_eca4colipa_e'	'(enterobacterial common antigen)x4 core oligosaccharide lipid A exchange'	1000	2.40918	-2.61813	-0.997591
'EX_sel_e'	'Selenate exchange'	499.105	0.00155513	-5.50642	-0.999997
'O16GLCT1'	'Glucosyltransferase I (LPS O16 antigen biosynthesis)'	51.0855	2.2132e-05	-6.36328	-1
'ARBTNtpp'	'Aerobactin secretion (to periplasm)'	1000	0.00778947	-5.10849	-0.999992
'ARBTNtex'	'Aerobactin secretion (to extracellular)'	998.209	0.00650439	-5.18601	-0.999993
'23CCMPtex'	'23cCMP transport via diffusion (extracellular to periplasm)'	51.0855	2.2132e-05	-6.36328	-1
'23CUMPtex'	'23cUMP transport via diffusion (extracellular to periplasm)'	51.0855	2.2132e-05	-6.36328	-1
'3CMPtex'	'3CMP transport via diffusion (extracellular to periplasm)'	51.0855	2.2132e-05	-6.36328	-1
'FEENTERtpp'	'Enterochelin transport (secretion)'	998.209	0.00318584	-5.496	-0.999997
'FEENTERtex'	'Enterochelin transport (secretion periplasm)'	274.444	0.000258111	-6.02665	-0.999999
'FEOXAMUtpp'	'Ferroxamine (minus Fe3) secretion (to periplasm)'	1999	0.0279941	-4.85375	-0.999986
'FECRMUtpp'	'Ferrichrome (minus Fe) secretion (to periplasm)'	1997.31	0.0110569	-5.25681	-0.999994
'PTRCt2pp'	'Putrescine transport in via proton symport'	817.139	0.000888179	-5.9638	-0.999999
'ETHSO3tex'	'Ethanesulfonate transport via diffusion (extracellular to periplasm)'	817.139	0.000888179	-5.9638	-0.999999
'FE3HOXR3'	'Fe(III)hydroxamate reductase'	63.8568	2.76651e-05	-6.36328	-1
'FEENTERR1'	'Fe-enterobactin reduction (Fe(III)-unloading)'	63.8568	2.76651e-05	-6.36328	-1
'SULFACtex'	'Sulfoaceate transport via diffusion (extracellular to periplasm)'	12.7714	5.53292e-06	-6.36328	-1
'EX_sulfac_e'	'Sulfoacetate exchange'	12.7714	5.53292e-06	-6.36328	-1
'EX_butso3_e'	'Butanesulfonate exchange'	1000	0.00631363	-5.19972	-0.999994
'NOtex'	'Nitric oxide transport via diffusion (extracellular to periplasm)'	274.444	0.000235979	-6.06558	-0.999999
'NOtpp'	'NO transport (diffusion)'	1997.33	0.0110569	-5.25682	-0.999994
'N2Otpp'	'Nitrious oxide transport (diffusion)'	1000	0.00145006	-5.83861	-0.999999
'N2Otex'	'Nitrious oxide transport via diffusion (extracellular to periplasm)'	1998.32	0.00622457	-5.50656	-0.999997
'CRNt8pp'	'L-carnitine/D-carnitine antiporter (periplasm)'	1000	0.00104502	-5.98088	-0.999999
'CRNt2rpp'	'L-carnitine outward transport (H+ antiport)'	51.0855	2.2132e-05	-6.36328	-1
'CRNDt2rpp'	'D-carnitine outward transport (H+ antiport)'	51.0855	2.2132e-05	-6.36328	-1
'CTBTt2rpp'	'Cronobetaine outward transport (H+ antiport)'	191.643	0.00129828	-5.16912	-0.999993
'INOSTt4pp'	'Na+/myo-inositol symporter (periplasm)'	998.209	0.00940543	-5.02584	-0.999991
'PHEMEtiex'	'Protoheme transport irreversible out via diffusion (periplasm to extracellular)'	332.736	0.000205628	-6.20902	-0.999999
'CYANtex'	'Cyanide transport via diffusion (extracellular to periplasm)'	1999.77	1.30386	-3.18575	-0.999348
'SO3tex'	'Sulfite transport via diffusion (extracellular to periplasm)'	2000	1.1701	-3.23281	-0.999415
'TCYNTtex'	'Thiocyanate transport via diffusion (extracellular to periplasm)'	1998.21	1.08109	-3.26678	-0.999459
'METSOX2abcpp'	'L-methionine R-oxide transport via ABC system (periplasm)'	47.7626	7.52113e-06	-6.8028	-1
'METSOX1tex'	'L-methionine S-oxide diffusion (extracellular)'	2.56173e-08	7.49082e-09	-0.534004	-0.707588
'METSOX2tex'	'L-methionine R-oxide diffusion (extracellular)'	7.74269e-08	3.77942e-08	-0.311466	-0.511872
'3UMPtex'	'3UMP transport via diffusion (extracellular to periplasm)'	7.74269e-08	3.77942e-08	-0.311466	-0.511872
'FALDtpp'	'Formaldehyde transport via diffusion (periplasm)'	55.9771	1.71056e-05	-6.51487	-1
'EX_tym_e'	'Tyramine exchange'	55.9771	1.71056e-05	-6.51487	-1
'EX_imp_e'	'IMP exchange'	503.148	0.000159309	-6.49945	-1
'DOPAtex'	'Dopamine transport via diffusion (extracellular to periplasm)'	503.148	0.000159309	-6.49945	-1
'ETHAtex'	'Ethanolamine transport via diffusion (extracellular)'	1000	0.0004695	-6.32836	-1
'G3PStex'	'Glycerophosphserine transport via diffusion (extracellular to periplasm)'	1000	0.0004695	-6.32836	-1
'FEENTERR2'	'Fe-enterobactin reduction (Fe(III)-unloading)'	499.105	0.000899295	-5.74429	-0.999998
'FE3HOXexs'	'Fe(III) hydroxamate Fe-loading reaction (spontaneaous)'	1998.07	0.00676649	-5.47025	-0.999997
'FECRMR3'	'Ferrichrome reductase'	998.209	0.0103318	-4.98505	-0.99999
'ACGAL1Ptex'	'N-acetyl-D-galactosamine 1-phosphate transport via diffusion (extracellular to periplasm)'	2000	1.60473	-3.09563	-0.999198
'ACGALtex'	'N-acetyl-D-galactosamine transport via diffusion (extracellular to periplasm)'	1000	0.00044588	-6.35078	-1
'GLCUR1Ptex'	'D-glucuronate 1-phosphate transport via diffusion (extracellular to periplasm)'	1000	0.0222148	-4.65336	-0.999978
'ISETACtex'	'Isethionate transport via diffusion (extracellular to periplasm)'	823.333	0.000178023	-6.6651	-1
'UACGAMtex'	'UDP-N-acetyl-D-glucosamine transport via diffusion (extracellular to periplasm)'	1000	0.00194698	-5.71064	-0.999998
'MSO3tex'	'Methanesulfonate transport via diffusion (extracellular to periplasm)'	1000	0.0938623	-4.02751	-0.999906
'FECRMR1'	'Ferrichrome reductase'	509.922	0.00764938	-4.82388	-0.999985
'AGM3Pt2pp'	'GlcNAc-anhMurNAc tripeptide transport in via proton symport (periplasm)'	998.349	0.00246007	-5.60834	-0.999998
'AGMt2pp'	'GlcNAc-anhMurNAc transport in via proton symport (periplasm)'	1000	0.00310923	-5.50735	-0.999997
'ARBTNR1'	'Aerobactin reductase'	163.962	0.000186638	-5.94374	-0.999999
'ARBTNR2'	'Aerobactin reductase'	163.962	0.000186638	-5.94374	-0.999999
'ARBTNR3'	'Aerobactin reductase'	1000	0.0247814	-4.60587	-0.999975
'FEOXAMexs'	'Ferroxamine Fe3-loading reaction (spontaneous)'	999.798	0.0416627	-4.38016	-0.999958
'FEOXAMR2'	'Ferroxamine reductase'	1000	0.00617402	-5.20943	-0.999994
'FEOXAMR3'	'Ferroxamine reductase'	998.209	0.00244375	-5.61116	-0.999998
'AGt3'	'Silver transport out via proton antiport'	999.101	0.00126447	-5.8977	-0.999999
'CD2t3pp'	'Cadmium (Cd+2) transport out via proton antiport (periplasm)'	1000	0.0109644	-4.96002	-0.999989
'SKMt2pp'	'Shikimate transport in via proton symport (periplasm)'	1000	0.0283711	-4.54712	-0.999972
'FE2t2pp'	'Iron (II) transport in via proton symport (periplasm)'	274.444	0.000235979	-6.06558	-0.999999
'GLYC2Ptex'	'Glycerol-2-phosphate transport via diffusion (extracellular to periplasm)'	274.444	0.000235979	-6.06558	-0.999999
'R5Ptex'	'Ribose 5-phosphate transport via diffusion (extracellular to periplasm)'	2000	0.0622053	-4.5072	-0.999969
'THRPtex'	'Phospho-L-threonine transport via diffusion (extracellular to periplasm)'	51.0855	2.2132e-05	-6.36328	-1
'TYRPtex'	'Phopho-L-tyrosine transport via diffusion (extracellular to periplasm)'	51.0855	2.2132e-05	-6.36328	-1
'CPGNR2'	'Coprogen(Fe(III)) reductase'	1996.07	0.0550785	-4.55919	-0.999972
'CPGNR3'	'Coprogen(Fe(III)) reductase'	1000	0.0775629	-4.11035	-0.999922
'CPGNUtpp'	'Coprogen unloaded secretion'	1000	0.00109758	-5.95956	-0.999999
'CPGNUtex'	'Coprogen unloaded secretion (extracellular)'	1000	0.198234	-3.70282	-0.999802
'CPGNexs'	'Coprogen Fe-loading reaction (spontaneaous)'	736.434	0.000244987	-6.47799	-1
'ACGAtex'	'N-Acetyl-D-glucosamine transport via diffusion (extracellular to periplasm)'	998.318	0.00107682	-5.96712	-0.999999
'DDCAtexi'	'Fatty acid (dodecanoate) transport via facilitated irreversible diffusion (extracellular to periplasm)'	998.318	0.00394488	-5.40324	-0.999996
'HDCAtexi'	'Hexadecanoate transport via facilitated irreversible diffusion (extracellular to periplasm)'	548.888	0.000471959	-6.06558	-0.999999
'GUACYC'	'Guanylate cyclase'	998.209	0.00222344	-5.6522	-0.999998
'ATPHs'	'ATP amine hydrolysis (spontaneous)'	998.347	0.0041901	-5.37706	-0.999996
'GTPHs'	'GTP amine hydrolysis (spontaneous)'	578.584	0.000903398	-5.80649	-0.999998
'EX_cd2_e'	'Cadmium exchange'	0.00137233	0.00137219	-4.63079e-05	-0.000106622
'IDONt2rpp'	'L-idonate transport via proton symport, reversible (periplasm)'	999.698	7.23505e-05	-7.14043	-1
'ILEabcpp'	'L-isoleucine transport via ABC system (periplasm)'	0.00137233	0.00137219	-4.48609e-05	-0.000103291
'INDOLEt2pp'	'Indole transport via proton symport, irreversible (periplasm)'	431.06	0.00245944	-5.2437	-0.999994
'INSt2pp'	'Inosine transport in via proton symport (periplasm)'	431.06	0.00245944	-5.2437	-0.999994
'LYXt2pp'	'L-Lyxose transport via proton symport (periplasm)'	998.318	0.00286471	-5.54219	-0.999997
'OCDCAtexi'	'Octadecanoate transport via facilitated irreversible diffusion (extracellular to periplasm)'	431.06	0.00245944	-5.2437	-0.999994
'OCDCEAtexi'	'Octadecenoate (n-C18:1) transport via facilitated irreversible diffusion (extracellular to periplasm)'	998.318	0.00286471	-5.54219	-0.999997
'G6Ptex'	'Glucose 6-phosphate transport via diffusion (extracellular to periplasm)'	240.167	0.0001561	-6.18711	-0.999999
'MOBDtex'	'Molybdate transport via diffusion (extracellular to periplasm)'	236.211	0.00497511	-4.6765	-0.999979
'NI2tex'	'Nickel transport via diffusion (extracellular to periplasm)'	250.825	0.00497511	-4.70257	-0.99998
'R1PK'	'Ribose 1-phosphokinase'	499.105	0.00144657	-5.53785	-0.999997
'LEUabcpp'	'L-leucine transport via ABC system (periplasm)'	332.736	0.000205628	-6.20902	-0.999999
'L_LACt2rpp'	'L-lactate reversible transport via proton symport (periplasm)'	999.873	0.00101217	-5.99469	-0.999999
'MAN6Pt6_2pp'	'Mannose-6-phosphate transport via phosphate antiport (periplasm)'	51.0855	2.2132e-05	-6.36328	-1
'MELIBt2pp'	'Melibiose transport in via symport (periplasm)'	1000	0.000834862	-6.07839	-0.999999
'EX_fe3hox_un_e'	'Fe(III)hydoxamate, unloaded exchange'	998.209	0.00238237	-5.62221	-0.999998
'NAt3_2pp'	'Sodium proton antiporter (H:NA is 2) (periplasm)'	332.736	0.000205628	-6.20902	-0.999999
'NO2t2rpp'	'Nitrite transport in via proton symport, reversible (periplasm)'	1999.92	0.0460467	-4.63781	-0.999977
'FECRMtonex'	'Ferrichrome transport via ton system (extracellular)'	1000	0.302519	-3.51925	-0.999697
'ARBTNtonex'	'Aerobactin transport via ton system (extracellular)'	998.209	0.00318584	-5.496	-0.999997
'EX_enter_e'	'Enterochelin exchange'	55.9771	1.71056e-05	-6.51487	-1
'EX_fecrm_un_e'	'Ferrichrome minus Fe(III) exchange'	232.222	0.000125601	-6.26691	-0.999999
'EX_cgly_e'	'Cys-Gly exchange'	232.222	0.000125601	-6.26691	-0.999999
'EX_chtbs_e'	'Chitobiose exchange'	232.222	0.000125601	-6.26691	-0.999999
'EX_gmp_e'	'GMP exchange'	252.774	2.707e-05	-6.97024	-1
'H2O2tex'	'Hydrogen peroxide transport via diffusion (external)'	999.382	0.000869467	-6.06048	-0.999999
'ADEtex'	'Adenine transport via diffusion (extracellular to periplasm)'	1000	0.251148	-3.60007	-0.999749
'ADNtex'	'Adenosine transport via diffusion (extracellular to periplasm)'	1000	0.00235995	-5.6271	-0.999998
'AGMtex'	'Agmatine transport via diffusion (extracellular to periplasm)'	7.74269e-08	3.76554e-08	-0.313065	-0.513666
'ALAtex'	'L-alanine transport via diffusion (extracellular to periplasm)'	274.444	0.000235979	-6.06558	-0.999999
'BALAtex'	'Beta-alanine transport via diffusion (extracellular to periplasm)'	55.9771	1.71056e-05	-6.51487	-1
'DALAtex'	'D-Alanine transport via diffusion (extracellular to periplasm)'	55.9771	1.71056e-05	-6.51487	-1
'AMPtex'	'AMP transport via diffusion (extracellular to periplasm)'	209.413	0.000260938	-5.90447	-0.999999
'ARBtex'	'L-arabinose transport via diffusion (extracellular to periplasm)'	209.413	0.000260938	-5.90447	-0.999999
'ARGtex'	'L-arginine transport via diffusion (extracellular to periplasm)'	209.413	0.000260938	-5.90447	-0.999999
'ASCBtex'	'L-ascorbate transport via diffusion (extracellular to periplasm)'	1998.21	0.00508308	-5.59451	-0.999997
'FE3HOXtonex'	'Fe(III)hydroxamine transport via ton system (extracellular)'	209.413	0.000260938	-5.90447	-0.999999
'MMETtex'	'S-methyl-L-methionine transport via diffusion (extracellular to periplasm)'	209.413	0.000260938	-5.90447	-0.999999
'FE3tex'	'Iron (III) transport via diffusion (extracellular to periplasm)'	999.858	0.000746023	-6.12719	-0.999999
'MG2tex'	'Magnesium (Mg+2) transport via diffusion (extracellular to periplasm)'	999.858	0.000711514	-6.14775	-0.999999
'Zn2tex'	'Zinc (Zn+2) transport via diffusion (extracellular to periplasm)'	628.048	0.000262335	-6.37914	-1
'MMETt2pp'	'S-methylmethionine permease (periplasm)'	628.19	0.000666327	-5.9744	-0.999999
'CD2tex'	'Cadmium (Cd+2) transport via diffusion (extracellular to periplasm)'	998.318	0.0048081	-5.3173	-0.999995
'GLUABUTt7pp'	'4-aminobutyrate/glutamate antiport (periplasm)'	998.318	0.00480984	-5.31714	-0.999995
'GLUt2rpp'	'L-glutamate transport via proton symport, reversible (periplasm)'	431.06	0.00245944	-5.2437	-0.999994
'GLYALDtpp'	'Glyceraldehyde facilitated diffusion (periplasm)'	823.333	0.000719598	-6.05849	-0.999999
'EX_frulys_e'	'Fructoselysine exchange'	1000	0.0070278	-5.15318	-0.999993
'METOX1s'	'Methionine oxidation (spontaneous)'	166.368	0.000518378	-5.50642	-0.999997
'METOX2s'	'Methionine oxidation 2 (spontaneous)'	628.048	0.000262335	-6.37914	-1
'FRUURtex'	'D-fructuronate transport via diffusion (extracellular)'	248.762	0.00018479	-6.12911	-0.999999
'ECAtpp'	'Enterobacterial common antigen transferase (flippase, cytoplasm to periplasm)'	1602.64	0.00266752	-5.77873	-0.999998
'O16AUNDtpp'	'O16 antigen (flippase, cytoplasm to periplasm)'	274.444	0.000235979	-6.06558	-0.999999
'GLYCAt2rpp'	'D-glycerate transport via proton symport, reversible (periplasm)'	499.105	0.00144657	-5.53785	-0.999997
'GLYCAtex'	'D-glycerate transport via diffusion (extracellular to periplasm)'	754.725	0.00107199	-5.8476	-0.999999
'EX_enlipa_e'	'Phosphoethanolamine KDO(2)-lipid (A) exchange'	1000	0.000150589	-6.82221	-1
'EX_hacolipa_e'	'Hepta-acylated core oligosaccharide lipid A (E. coli) exchange'	252.774	0.0002092	-6.08217	-0.999999
'GLYC3Pt6pp'	'Glycerol-3-phosphate : phosphate antiporter (periplasm)'	1490.92	0.162749	-3.96194	-0.999891
'GLYCLTt4pp'	'Glycolate transport via sodium symport (periplasm)'	1000	0.284078	-3.54656	-0.999716
'GLYCtpp'	'Glycerol transport via channel (periplasm)'	1000	0.0232296	-4.63396	-0.999977
'HISt2rpp'	'L-histidine reversible transport via proton symport (periplasm)'	1000	0.0239107	-4.62141	-0.999976
'COBALT2tex'	'Cobalt (Co+2) transport via diffusion (extracellular to periplasm)'	503.148	0.000159309	-6.49945	-1
'FALGTHLs'	'Formaldehyde glutathione ligase (spontaneous)'	999.101	0.000884473	-6.05292	-0.999999
'DIMPtex'	'DIMP transport via diffusion (extracellular to periplasm)'	999.873	0.00101217	-5.99469	-0.999999
'GALURt2rpp'	'D-galacturonate transport via proton symport, reversible (periplasm)'	524.241	0.00281519	-5.27002	-0.999995
'GLCNt2rpp'	'D-gluconate transport via proton symport, reversible (periplasm)'	9.96551e-07	1999.99	9.30253	2.00691e+09
'GLCRt2rpp'	'D-glucarate transport via proton symport, reversible (periplasm)'	1199.64	7.04342e-05	-7.23127	-1
'EX_ala__D_e'	'D-Alanine exchange'	1000	9.26662e-06	-8.03308	-1
'XTSNtex'	'Xanthosine transport via diffusion (extracellular to periplasm)'	1000	5.20207	-2.28382	-0.994798
'EX_hdca_e'	'Hexadecanoate (n-C16:0) exchange'	823.333	0.000178023	-6.6651	-1
'EX_glcr_e'	'D-Glucarate exchange'	0.0001281	2.09395e-06	-1.78658	-0.983654
'HYPOE'	'Hypothetical enyme'	998.209	0.0110243	-4.95687	-0.999989
'UREAtpp'	'Urea transport via facilitate diffusion (periplasm)'	998.209	0.00986948	-5.00493	-0.99999
'XANt2pp'	'Xanthine transport in via proton symport (periplasm)'	998.209	6.29137e-05	-7.20048	-1
'PPPNt2rpp'	'3-phenylpropionate transport via proton symport, reversible (periplasm)'	998.209	0.0103318	-4.98505	-0.99999
'PTRCORNt7pp'	'Putrescine/ornithine antiporter (periplasm)'	998.209	8.87679e-05	-7.05097	-1
'HG2tex'	'Mercury (Hg+2) transport via diffusion (extracellular to periplasm)'	999.873	0.00644809	-5.19051	-0.999994
'NADPPPS'	'NADP phosphatase'	88.3898	3.47905e-05	-6.40494	-1
'EX_mnl_e'	'D-Mannitol exchange'	999.873	0.00101217	-5.99469	-0.999999
'DHAtex'	'Dihydroxyacetone transport via diffusion (extracellular to periplasm)'	1000	0.295228	-3.52984	-0.999705
'ETOHtex'	'Ethanol transport via diffusion (extracellular to periplasm)'	999.101	0.00107199	-5.96942	-0.999999
'EX_asn__L_e'	'L-Asparagine exchange'	999.101	0.00118737	-5.92502	-0.999999
'EX_mal__L_e'	'L-Malate exchange'	1.14888e-06	1.14868e-06	-7.50617e-05	-0.000172821
'NMNN'	'NMN nucleosidase'	646.913	0.000784692	-5.91615	-0.999999
'EX_no2_e'	'Nitrite exchange'	431.06	0.00245944	-5.2437	-0.999994
'ACACtex'	'Acetoacetate transport via diffusion (extracellular to periplasm)'	548.888	0.000471959	-6.06558	-0.999999
'ACNAMtex'	'N-acetylneuraminate transport via diffusion (extracellular to periplasm)'	1000	0.111695	-3.95197	-0.999888
'ASO3t8pp'	'Arsenite efflux via ATP hydrolysis (periplasm)'	999.101	0.00126447	-5.8977	-0.999999
'H2Stex'	'H2s transport via diffusion (extracellular to periplasm)'	999.101	0.00144008	-5.84122	-0.999999
'OMCDC'	'2-Oxo-4-methyl-3-carboxypentanoate decarboxylation'	417.125	0.00026211	-6.20178	-0.999999
'EX_nh4_e'	'Ammonia exchange'	753.199	0.000302728	-6.39586	-1
'EX_ddca_e'	'Dodecanoate (n-C12:0) exchange'	999.101	0.00171642	-5.76499	-0.999998
'FORt2pp'	'Formate transport via proton symport (uptake only, periplasm)'	252.774	0.0002092	-6.08217	-0.999999
'EX_r5p_e'	'Alpha-D-Ribose 5-phosphate exchange'	998.209	0.000180917	-6.74174	-1
'EX_glyc2p_e'	'Glycerol 2-phosphate exchange'	499.105	0.00144657	-5.53785	-0.999997
'4PEPTtex'	'LalaDgluMdapDala (pentapeptide) transport via diffusion (extracellular to periplasm)'	503.148	0.000159309	-6.49945	-1
'EX_pnto__R_e'	'(R)-Pantothenate exchange'	1252.77	0.111695	-4.04984	-0.999911
'HPPPNt2rpp'	'3-(3-hydroxyphenyl)propionate transport via proton symport, reversible (periplasm)'	236.211	0.00497511	-4.6765	-0.999979
'EX_gam_e'	'D-Glucosamine exchange'	185.157	0.000711941	-5.4151	-0.999996
'EX_inost_e'	'Myo-Inositol exchange'	209.413	0.000260938	-5.90447	-0.999999
'EX_mobd_e'	'Molybdate exchange'	1000	0.000578445	-6.23774	-0.999999
'EX_phe__L_e'	'L-Phenylalanine exchange'	1000	0.139692	-3.85483	-0.99986
'EX_thr__L_e'	'L-Threonine exchange'	503.148	0.000159309	-6.49945	-1
'EX_uri_e'	'Uridine exchange'	503.148	0.000159309	-6.49945	-1
'H2St1pp'	'H2s transport (periplasm)'	1000	0.0247905	-4.60572	-0.999975
'EX_halipa_e'	'Hepta-acylated KDO(2)-lipid (A) exchange'	1000	0.139692	-3.85483	-0.99986
'EX_cmp_e'	'CMP exchange'	736.434	0.000244987	-6.47799	-1
'EX_csn_e'	'Cytosine exchange'	2.56174e-08	7.51861e-09	-0.532397	-0.706504
'EX_etoh_e'	'Ethanol exchange'	191.05	3.0085e-05	-6.8028	-1
'EX_his__L_e'	'L-Histidine exchange'	7.74269e-08	3.77942e-08	-0.311466	-0.511872
'EX_k_e'	'K+ exchange'	252.774	0.0002092	-6.08217	-0.999999
'EX_na1_e'	'Sodium exchange'	252.774	0.0002092	-6.08217	-0.999999
'EX_dmso_e'	'Dimethyl sulfoxide exchange'	273.238	1.38092e-05	-7.29637	-1
'EX_12ppd__S_e'	'(S)-Propane-1,2-diol exchange'	1000	0.0203094	-4.6923	-0.99998
'EX_pppn_e'	'Phenylpropanoate exchange'	998.209	0.000883731	-6.0529	-0.999999
'EX_galt_e'	'Galactitol exchange'	998.209	0.000432591	-6.36314	-1
'FECRMUtex'	'Ferrichrome (minus Fe) secretion (to extracellular)'	1000	0.000578445	-6.23774	-0.999999
'CLtex'	'Chloride (Cl-1) transport via diffusion (extracellular to periplasm)'	1000	0.0247905	-4.60572	-0.999975
'EX_glcur1p_e'	'D-Glucuronate 1-phosphate exchange'	1000	0.00217053	-5.66343	-0.999998
'EX_thrp_e'	'L-Threonine O-3-phosphate exchange'	1000	0.0093036	-5.03135	-0.999991
'EX_pydxn_e'	'Pyridoxine exchange'	27.9886	8.55264e-06	-6.51488	-1
'EX_gsn_e'	'Guanosine exchange'	1000	0.208914	-3.68003	-0.999791
'EX_orot_e'	'Orotate exchange'	1000	5.00266	-2.3008	-0.994997
'G6Pt6_2pp'	'Glucose-6-phosphate transport via phosphate antiport (periplasm)'	7.74269e-08	3.76554e-08	-0.313065	-0.513666
'EX_o2_e'	'oxygen exchange'	1000	0.111695	-3.95197	-0.999888
'EX_gal1p_e'	'Alpha-D-Galactose 1-phosphate exchange'	2.56173e-08	1.24571e-08	-0.313117	-0.513724
'EX_dcmp_e'	'DCMP exchange'	51.0855	2.2132e-05	-6.36328	-1
'EX_23ccmp_e'	'2'',3''-Cyclic CMP exchange'	51.0855	2.2132e-05	-6.36328	-1
'EX_3cmp_e'	'3''-cmp exchange'	1000	2.45363e-06	-8.61019	-1
'EX_skm_e'	'Shikimate exchange'	1000	0.000473489	-6.32469	-1
'EX_ag_e'	'Silver exchange'	1000	0.0207601	-4.68277	-0.999979
'EX_cys__D_e'	'D-Cysteine exchange'	2000	1.36339	-3.16641	-0.999318
'EX_acser_e'	'O-Acetyl-L-serine exchange'	999.382	0.000795572	-6.09905	-0.999999
'EX_arbtn_e'	'Aerobactin minus Fe3 exchange'	628.048	0.000262335	-6.37914	-1
'EX_dopa_e'	'Dopamine exchange'	998.318	0.00480087	-5.31795	-0.999995
'EX_hom__L_e'	'L-Homoserine exchange'	240.167	0.0001561	-6.18711	-0.999999
'THRt2pp'	'L-threonine efflux transport via proton antiport (periplasm)'	240.167	0.0001561	-6.18711	-0.999999
'EX_LalaDgluMdapDala_e'	'L-alanine-D-glutamate-meso-2,6-diaminoheptanedioate-D-alanine exchange'	999.382	0.000745825	-6.12709	-0.999999
'CYSDtex'	'D-cysteine transport via diffusion (extracellular to periplasm)'	1000	0.0150522	-4.8224	-0.999985
'EX_so2_e'	'Sulfur dioxide exchange'	274.288	7.25356e-06	-7.57766	-1
'EX_dms_e'	'Dimethyl sulfide exchange'	1000	0.00139813	-5.85445	-0.999999
'G3PGtex'	'Glycerophoglycerol transport via diffusion (extracellular to periplasm)'	136.199	0.000162631	-5.92297	-0.999999
'EX_acgal1p_e'	'N-Acetyl-D-galactosamine 1-phosphate exchange'	1860.74	1005.89	-0.267138	-0.459417
'EX_cyan_e'	'Hydrogen cyanide exchange'	546.166	1.45484e-05	-7.57451	-1
'EX_tyrp_e'	'Phosphotyrosine exchange'	540.446	1.45484e-05	-7.56994	-1
'EX_14glucan_e'	'1,4-alpha-D-glucan exchange'	1000	4.95779	-2.30471	-0.995042
'EX_fe3dhbzs_e'	'Ferric 2,3-dihydroxybenzoylserine exchange'	1000	0.0222255	-4.65315	-0.999978
'EX_g3pg_e'	'Glycerophosphoglycerol exchange'	1000	0.305111	-3.51554	-0.999695
'EX_g3pi_e'	'Sn-Glycero-3-phospho-1-inositol exchange'	431.06	0.00203879	-5.32517	-0.999995
'EX_g3ps_e'	'Glycerophosphoserine exchange'	1000	0.0219836	-4.6579	-0.999978
'UMPtex'	'UMP transport via diffusion (extracellular to periplasm)'	514.296	0.000128656	-6.60178	-1
'G1Ptex'	'D-glucose 1-phosphate transport via diffusion'	1000	0	-18	-1
'CUt3'	'Copper transport out via proton antiport'	817.139	0.00088796	-5.9639	-0.999999
'ZN2t3pp'	'Zinc (Zn+2) transport out via proton antiport (periplasm)'	367.871	8.00381e-05	-6.6624	-1
'SKMtex'	'Shikimate transport via diffusion (extracellular to periplasm)'	577.942	0.000108475	-6.72655	-1
'MNt2pp'	'Manganese (Mn+2) transport in via proton symport (periplasm)'	1000	0.152555	-3.81657	-0.999847
'O2Stex'	'Superoxide anion transport via diffusion (extracellular to periplasm)'	588.53	0.0257179	-4.35953	-0.999956
'EX_dimp_e'	'DIMP exchange'	1000	0.00288577	-5.53974	-0.999997
'HOMtex'	'L-homoserine transport via diffusion (extracellular to periplasm)'	5.9793e-07	2.9075e-07	-0.313131	-0.513739
'SO2tpp'	'SO2 transport via diffusion (periplasm)'	1000	0.164605	-3.78356	-0.999835
'CYStpp'	'L-cysteine export via facilitated transport'	705.371	0.00081136	-5.9392	-0.999999
'2AGPG140tipp'	'2-Acyl-sn-glycero-3-phosphoglycerol (n-C14:0) transporter via facilitated diffusion (periplasm)'	0.0001281	2.09395e-06	-1.78658	-0.983654
'2AGPG141tipp'	'2-Acyl-sn-glycero-3-phosphoglycerol (n-C14:1) transporter via facilitated diffusion (periplasm)'	1000	0.0282304	-4.54928	-0.999972
'2AGPG181tipp'	'2-Acyl-sn-glycero-3-phosphoglycerol (n-C18:1) transporter via facilitated diffusion (periplasm)'	1159.37	0.305683	-3.57895	-0.999736
'12DGR141tipp'	'1,2 diacylglycerol transport via flipping (periplasm to cytoplasm, n-C14:1)'	1250.83	0.310058	-3.60575	-0.999752
'CLPNH161pp'	'Cardiolipin hydrolase (periplasm, n-C16:1)'	1000	0.0282304	-4.54928	-0.999972
'CLPNH181pp'	'Cardiolipin hydrolase (periplasm, n-C18:1)'	145.079	0.000185755	-5.89266	-0.999999
'EX_dgmp_e'	'DGMP exchange'	1000	0.152555	-3.81657	-0.999847
'EX_manglyc_e'	'2(alpha-D-Mannosyl)-D-glycerate exchange'	1000	0.0152988	-4.81534	-0.999985
'FE3DHBZStonex'	'Ferric 2,3-dihydroxybenzoylserine transport via ton system (extracellular)'	1000	0.0093036	-5.03135	-0.999991
'AACTOOR'	'Aminoacetone:oxygen oxidoreductase(deaminating)(flavin-containing)'	853.803	0.0170777	-4.69893	-0.99998
'23DAPPAtex'	'2,3-diaminopropionate transport via diffusion'	1000	0.0152853	-4.81573	-0.999985
'FEOXAMtonex'	'Ferroxamine transport via ton system (extracellular)'	1000	0.0152988	-4.81534	-0.999985
'EX_tsul_e'	'Thiosulfate exchange'	2000	0.176063	-4.05536	-0.999912
'EX_n2o_e'	'Nitrous oxide exchange'	2000	0.417098	-3.68079	-0.999791
'EX_maltttr_e'	'Maltotetraose exchange'	1000	0.0412568	-4.3845	-0.999959
'UDCPPtppi'	'Undecaprenyl phosphate transport (cytoplasm to periplasm)'	1000	0.021153	-4.67463	-0.999979
'MELIBt3ipp'	'Melibiose transport in via antiport (periplasm)'	639.199	0.000174662	-6.56344	-1
'EX_pydx_e'	'Pyridoxal exchange'	993.798	0.00223984	-5.64708	-0.999998
'EX_g1p_e'	'D-Glucose 1-phosphate exchange'	1000	0.022486	-4.64809	-0.999978
'NAt3pp'	'Sodium transport out via proton antiport (cytoplasm to periplasm)'	1000	0.305111	-3.51554	-0.999695
'DHORDfum'	'Fumarate dependent DHORD'	1000	0.152555	-3.81657	-0.999847
'DSBGGT'	'DsbG:glutathione thiotransferase'	1000	0.101704	-3.99266	-0.999898
'DM_oxam_c'	'Sink needed to allow oxamate to leave system'	209.413	0.000260938	-5.90447	-0.999999
'PDX5PO2'	'Pyridoxine 5''-phosphate oxidase (anaerboic'	627.359	0.000859239	-5.8634	-0.999999
'HG2t3pp'	'Mercury (Hg+2) transport out via proton antiport (periplasm)'	155.614	0.0002092	-5.87149	-0.999999
'EX_alaala_e'	'D-Alanyl-D-alanine exchange'	996.072	0.0845408	-4.07122	-0.999915
'EX_dtmp_e'	'DTMP exchange'	437.978	0.00123359	-5.55028	-0.999997
'12PPDRtpp'	'(R)-Propane-1,2-diol facilitated transport (periplasm)'	2.2423e-05	1.12115e-05	-0.30103	-0.5
'SO4t2pp'	'Sulfate transport in via proton symport (periplasm to cytoplasm)'	1000	2.33806	-2.63114	-0.997662
'12PPDRtex'	'(R)-Propane-1,2-diol transport via diffusion (extracellular to periplasm)'	780.917	0.0217648	-4.55485	-0.999972
'GAMAN6Ptex'	'D-glucosamine 6-phosphate transport via diffusion (extracellular to periplasm)'	1000	0.0243443	-4.6136	-0.999976
'PPALtpp'	'Propanal transport via channel (periplasm)'	1000	0.390117	-3.4088	-0.99961
'PROGLYtex'	'L-Prolinylglycine transport via diffusion (extracellular to periplasm)'	1000	0.390117	-3.4088	-0.99961
'EX_progly_e'	'L-Prolinylglycine exchange'	1000	0.96648	-3.01481	-0.999034
'2AGPA160tipp'	'2-Acyl-sn-glycero-3-phosphatidate (n-C16:0) transporter via facilitated diffusion (periplasm)'	2000	0.0257315	-4.89056	-0.999987
'2AGPA180tipp'	'2-Acyl-sn-glycero-3-phosphatidate (n-C18:0) transporter via facilitated diffusion (periplasm)'	191.61	0.00058634	-5.51427	-0.999997
'2AGPA141tipp'	'2-Acyl-sn-glycero-3-phosphatidate (n-C14:1) transporter via facilitated diffusion (periplasm)'	1000	0.0207601	-4.68277	-0.999979
'2AGPE140tipp'	'2-Acyl-sn-glycero-3-phosphoethanolamine (n-C14:0) transporter via facilitated diffusion (periplasm)'	137.527	0.000188482	-5.86312	-0.999999
'2AGPA161tipp'	'2-Acyl-sn-glycero-3-phosphatidate (n-C16:1) transporter via facilitated diffusion (periplasm)'	178.863	0.000187063	-5.98053	-0.999999
'2AGPA181tipp'	'2-Acyl-sn-glycero-3-phosphatidate (n-C18:1) transporter via facilitated diffusion (periplasm)'	1000	0.0235077	-4.62879	-0.999976
'2AGPG120tipp'	'2-Acyl-sn-glycero-3-phosphoglycerol (n-C12:0) transporter via facilitated diffusion (periplasm)'	511.998	1.14479e-05	-7.65054	-1
'GTHOXtex'	'Glutathione (ox) transport via diffusion (extracellular to periplasm)'	1000	2.48031	-2.60549	-0.99752
'DSBAO1'	'DsbA protein reoxidation reaction (aerobic)'	1000	0.305111	-3.51554	-0.999695
'CGLYabcpp'	'L-Cysteinylglycine (Cys-Gly) transport via ABC system (periplasm)'	155.614	0.0002092	-5.87149	-0.999999
'12DGR161tipp'	'1,2 diacylglycerol transport via flipping (periplasm to cytoplasm, n-C16:1)'	500	0.00477715	-5.0198	-0.99999
'12DGR181tipp'	'1,2 diacylglycerol transport via flipping (periplasm to cytoplasm, n-C18:1)'	1000	0.0152988	-4.81534	-0.999985
'ALAt4pp'	'L-alanine transport in via sodium symport (periplasm)'	462.431	0.000244987	-6.2759	-0.999999
'LYSt3pp'	'L-lysine transport out via proton antiport (cytoplasm to periplasm)'	686.401	0.000167365	-6.61291	-1
'EX_tungs_e'	'Tungstate exchange'	7.68521e-08	3.73708e-08	-0.313123	-0.51373
'EX_crn__D_e'	'D-carnitine exchange'	1000	0.305111	-3.51554	-0.999695
'CHLt2pp'	'Choline transport via proton symport (periplasm)'	3.7105e-08	1.08345e-08	-0.534624	-0.708005
'FRULYSt2pp'	'Fructoselysine transport via proton symport (periplasm)'	1000	0.0199715	-4.69959	-0.99998
'DM_aacald_c'	'Sink needed to allow aminoacetaldehyde to leave system'	1000	0.0290839	-4.53635	-0.999971
'COBALT2t3pp'	'Cobalt (Co+2) transport out via proton antiport (periplasm)'	1000	0.152555	-3.81657	-0.999847
'23DAPPAt2pp'	'2,3-diaminopropionate transport in via proton symport'	1000	0.101704	-3.99266	-0.999898
'CAt6pp'	'Calcium / sodium antiporter (1:1)'	1000	0.0152853	-4.81573	-0.999985
'LYSt2pp'	'L-lysine transport in via proton symport (periplasm)'	500	0.00477715	-5.0198	-0.99999
'GLYt2pp'	'Glycine transport in via proton symport (periplasm)'	236.211	0.00497511	-4.6765	-0.999979
'BALAt2pp'	'Beta-alanine transport in via proton symport (periplasm)'	274.444	0.000235979	-6.06558	-0.999999
'DALAt2pp'	'D-alanine transport in via proton symport (periplasm)'	240.167	0.000974497	-5.39173	-0.999996
'FE2tpp'	'Iron (+2) transport in via permease (no H+)'	1000	2000	0.30103	1
'MN2tpp'	'Manganese transport in via permease (no H+)'	1000	0.013657	-4.86465	-0.999986
'MG2tpp'	'Magnesium (+2) transport in via diffusion'	252.774	0.0002092	-6.08217	-0.999999
'NI2t3pp'	'Nickle (Ni+2) transport out via proton antiport (periplasm)'	2000	0.258588	-3.88842	-0.999871
'CU2tpp'	'Copper transport in via permease (no H+)'	496.899	0.000207987	-6.37823	-1
'FE2t3pp'	'Iron (Fe+2) transport out via proton antiport (periplasm)'	1000	4.95779	-2.30471	-0.995042
'CD2tpp'	'Cadmium (+2) transport in via permease (no H+)'	628.048	0.000262335	-6.37914	-1
'ETHAt2pp'	'Ethanolamine transport in via proton symport'	139.252	4.85084e-05	-6.45799	-1
'FE3abcpp'	'Iron (III) transport via ABC system (periplasm to cytoplasm)'	1000	0.0343781	-4.46372	-0.999966
'SELGTHR'	'Selenate glutathione reductase'	685.408	0.00144587	-5.67582	-0.999998
'SELGTHR3'	'Selenate glutathione reductase III'	206.165	0.000620547	-5.52144	-0.999997
'DOXRBCNtex'	'Doxorubicin transport via diffusion (extracellular to periplasm)'	993.798	0.0217648	-4.65954	-0.999978
'DOXRBCNtpp'	'Doxorubicin transport via TolC system'	1000	0.00620871	-5.207	-0.999994
'ETOHtrpp'	'Ethanol reversible transport via diffusion (periplasm)'	1000	0.00425299	-5.37131	-0.999996
'I4FE4SR'	'ISC [4Fe-4S] Reduction'	1000	0.00324394	-5.48893	-0.999997
'CMtex'	'Chloramphenicol transport via diffusion (extracellular to periplasm)'	1000	0.417098	-3.37976	-0.999583
'LALADGLUtex'	'L-alanyl-D-glutamate transport via diffusion (extracellular to periplasm)'	354.389	0.000192931	-6.26408	-0.999999
'LALALGLUtpp'	'L-alanyl-L-glutamate transport in via proton symport (periplasm)'	200.242	0.000521692	-5.58414	-0.999997
'EX_LalaLglu_e'	'L-alanine-L-glutamate exchange'	240.167	0.0001561	-6.18711	-0.999999
'EX_ttrcyc_e'	'Tetracycline exchange'	0.00130857	0.00130844	-4.47178e-05	-0.000102961
'EX_mincyc_e'	'Minocycline exchange'	0.00130857	0.00130843	-4.59541e-05	-0.000105808
'DM_4crsol_c'	'Sink needed to allow p-Cresol to leave system'	0.00130857	0.00130844	-4.47179e-05	-0.000102961
'FESD1s'	'Iron-sulfur cluster damage (peroxide, spontaneous)'	0.00130857	0.00130844	-4.47166e-05	-0.000102959
'EX_fusa_e'	'Fusidic acid exchange'	524.241	0.00281519	-5.27002	-0.999995
'FESD2s'	'Iron-sulfur cluster damage (nitrous oxide, spontaneous)'	793.975	0.0235222	-4.52833	-0.99997
'MEOHtrpp'	'Methanol reversible transport via diffusion (periplasm)'	686.401	0.000164002	-6.62173	-1
'SELtex'	'Selenate transport via diffusion (extracellular to periplasm)'	1999.99	0.0331983	-4.77991	-0.999983
'CDGS'	'7-deaza-7-carboxyguanine synthase'	7.68521e-08	3.73708e-08	-0.313123	-0.51373
'5MTRtpp'	'5-Methylthio-D-ribose transport via proton symport (periplasm)'	1846.82	0.00564774	-5.51455	-0.999997
'TTRCYCtex'	'Tetracycline transport via diffusion (extracellular to periplasm)'	1846.82	0.00564774	-5.51455	-0.999997
'FESR'	'Iron-sulfur cluster repair'	431.06	0.00203879	-5.32517	-0.999995
'SLNTtex'	'Selenite transport via diffusion (extracellular to periplasm)'	2.61688e-07	1.27528e-07	-0.312176	-0.512669
'SELGTHR2'	'Selenate glutathione reductase II'	1000	0.0234446	-4.62996	-0.999977
'RFAMPtpp'	'Rifampin transport via TolC system'	2.87196e-09	2000	11.8429	6.96389e+11
'BTNtex'	'Biotin transport via diffusion (extracellular to periplasm)'	1000	0.00301075	-5.52132	-0.999997
'ARBTtex'	'Arbutin transport via diffusion (extracellular to periplasm)'	1000	0.00301075	-5.52132	-0.999997
'EX_arbt_e'	'Arbutin exchange'	545.278	7.31297e-05	-6.87252	-1
'DMSOtpp'	'Dimethyl sulfoxide transport via diffusion (periplasm)'	159.366	0.000572663	-5.4445	-0.999996
'PYDXtpp'	'Pyridoxal import'	250.825	0.00494718	-4.70501	-0.99998
'SUCASPtpp'	'Succinate:aspartate antiporter (periplasm)'	322.627	0.000903398	-5.55282	-0.999997
'SUCMALtpp'	'Succinate:malate antiporter (periplasm)'	390.749	2.53681e-05	-7.18761	-1
'PYDXNtpp'	'Pyridoxine import'	671.096	0.00636801	-5.02278	-0.999991
'PYDAMtex'	'Pyridoxamine transport via diffusion (extracellular)'	160.32	0.000188178	-5.93042	-0.999999
'TARTt2_3pp'	'D-tartrate transport via proton symport (3 H) (periplasm)'	745.234	0.000795572	-5.97161	-0.999999
'SUCTARTtpp'	'Succinate:D-tartrate antiporter (periplasm)'	1000	0.305111	-3.51554	-0.999695
'CHTBStex'	'Chitobiose transport via diffusion (extracellular to periplasm)'	787.163	0.00103354	-5.88174	-0.999999
'TRPtipp'	'L-tryptophan transport out (periplasm)'	12.7714	5.53292e-06	-6.36328	-1
'SPMDt3pp'	'Spermidine transport out via proton antiport (periplasm)'	580.444	0.000192491	-6.47935	-1
'FEENTERES'	'Enterochelin Esterase (Fe containing)'	1000	0.00239145	-5.62134	-0.999998
'CLBtex'	'Cellobiose transport transport via diffusion extracellular to periplasm '	499.105	0.00155513	-5.50642	-0.999997
'CHOLATEtpp'	'Cholate transport via proton antiport'	1000	0.0152988	-4.81534	-0.999985
'4ABZGLUtr'	'P-aminobenzoyl glutamate:H+ symporter'	1000	0.0152988	-4.81534	-0.999985
'CYSItpp'	'Cystine efflux transport'	1000	0.0152988	-4.81534	-0.999985
'CLtipp'	'Chloride ion transport in via diffusion (periplasm)'	232.222	0.000125601	-6.26691	-0.999999
'PItpp'	'Phosphate export via facillated diffusion (periplasm)'	232.222	0.000125601	-6.26691	-0.999999
'LEUt3pp'	'L-leucine transport out via proton antiport (periplasm)'	1000	0.0152853	-4.81573	-0.999985
'INSt3pp'	'Inosine transport out via proton antiport (perisplasm)'	1000	0.0152853	-4.81573	-0.999985
'INDOLEt2rpp'	'Indole transport via proton symport, reversible (periplasm)'	1000	0.0152988	-4.81534	-0.999985
'ILEt2rpp'	'L-isoleucine reversible transport via proton symport (periplasm)'	1000	0.0152988	-4.81534	-0.999985
'GLYtpp'	'Glycine transport via facillitated diffusion'	1000	0.0152988	-4.81534	-0.999985
'FADt'	'FAD transporter, periplasm'	500	0.00764938	-4.81534	-0.999985
'FADtex'	'FAD transport, outer membrane'	1000	0.152555	-3.81657	-0.999847
'4HBZt3pp'	'4-hydroxybenzoate transport out via antiporter'	580.444	0.000192491	-6.47935	-1
'EX_mepn_e'	'Methylphosphonic acid exchange'	47.7626	7.52113e-06	-6.8028	-1
'SERtpp'	'L-serine export via facilitated transport'	12.7714	5.53292e-06	-6.36328	-1
'DHGLYH'	'Dehydroglycine Hydratase'	51.0855	2.2132e-05	-6.36328	-1
'EX_sq_e'	'Sulphoquinovose exchange'	12.7714	5.53292e-06	-6.36328	-1
'URATEtpp'	'Uric acid transporter'	12.7714	5.53292e-06	-6.36328	-1
'CS1tex'	'Cesium transport via diffusion'	1000	0.00020465	-6.68899	-1
'ADOCBLtonex'	'Adenosylcobalimin transport via ton system (extermal)'	500	0.00764938	-4.81534	-0.999985
'MEPNtex'	'Methylphosphonic acid transport via diffusion (extracellular to periplasm)'	500	0.00764266	-4.81573	-0.999985
'EX_4abzglu_e'	'4-aminobenzoyl-glutamate exchange'	500	0.00764266	-4.81573	-0.999985
'METGLCURtex'	'1-O-methyl-Beta-D-glucuronate via diffusion (extracellular)'	12.7714	5.53292e-06	-6.36328	-1
'FMNt'	'FMN transporter, periplasm'	12.7714	5.53292e-06	-6.36328	-1
'SUCCt1pp'	'Succinate transport via diffusion in (periplasm)'	1000	0	-18	-1
'BIOMASS_Ec_iML1515_core_75p37M'	'biomass pseudoreaction'	2000	6.78236e-05	-7.46965	-1
'BIOMASS_Ec_iML1515_WT_75p37M'	'E. coli biomass objective function (iML1515) - WT - with 75.37 GAM estimate'	1000	6.78236e-05	-7.16862	-1
'EX_akg_e_REV'	'2-Oxoglutarate exchange (reversible)'	47.7626	7.52113e-06	-6.8028	-1
'EX_ala__L_e_REV'	'L-Alanine exchange (reversible)'	274.444	0.00018702	-6.16657	-0.999999
'EX_glcn_e_REV'	'D-Gluconate exchange (reversible)'	1000	0.000395736	-6.40259	-1
'EX_gln__L_e_REV'	'L-Glutamine exchange (reversible)'	1000	0.000422661	-6.37401	-1
'EX_man_e_REV'	'D-Mannose exchange (reversible)'	753.199	0.000302728	-6.39586	-1
'EX_co2_e_REV'	'carbon dioxide exchange (reversible)'	218.919	7.1602e-06	-7.48536	-1
'EX_ile__L_e_REV'	'L-Isoleucine exchange (reversible)'	500	0.00764266	-4.81573	-0.999985
'EX_lac__L_e_REV'	'L-Lactate exchange (reversible)'	509.922	0.00764938	-4.82388	-0.999985
'EX_leu__L_e_REV'	'L-Leucine exchange (reversible)'	500	0.00764938	-4.81534	-0.999985
'EX_no3_e_REV'	'Nitrate exchange (reversible)'	1000	0.0152853	-4.81573	-0.999985
'EX_orn_e_REV'	'Ornithine exchange (reversible)'	1000	0.0152988	-4.81534	-0.999985
'EX_pro__L_e_REV'	'L-Proline exchange (reversible)'	500	0.00764938	-4.81534	-0.999985
'EX_succ_e_REV'	'Succinate exchange (reversible)'	232.222	0.000125601	-6.26691	-0.999999
'EX_thymd_e_REV'	'Thymidine exchange (reversible)'	251.574	0.000185654	-6.13196	-0.999999
'EX_tyr__L_e_REV'	'L-Tyrosine exchange (reversible)'	274.444	0.000185654	-6.16975	-0.999999
'EX_btn_e_REV'	'Biotin exchange (reversible)'	999.116	0.00328739	-5.48277	-0.999997
'EX_ptrc_e_REV'	'Putrescine exchange (reversible)'	998.209	0.00328739	-5.48237	-0.999997
'EX_fru_e_REV'	'D-Fructose exchange (reversible)'	500	0.00169246	-5.47045	-0.999997
'EX_trp__L_e_REV'	'L-Tryptophan exchange (reversible)'	274.444	0.000233807	-6.0696	-0.999999
'EX_din_e_REV'	'Deoxyinosine exchange (reversible)'	274.444	0.000235979	-6.06558	-0.999999
'EX_fmn_e_REV'	'FMN exchange (reversible)'	274.444	0.000233807	-6.0696	-0.999999
'EX_sucr_e_REV'	'Sucrose exchange (reversible)'	500	0.00764938	-4.81534	-0.999985
'EX_tre_e_REV'	'Trehalose exchange (reversible)'	500	0.00764938	-4.81534	-0.999985
'EX_zn2_e_REV'	'Zinc exchange (reversible)'	1000	2.76651e-05	-7.55807	-1
'EX_tmao_e_REV'	'Trimethylamine N-oxide exchange (reversible)'	251.574	0.00018702	-6.12878	-0.999999
'EX_26dap__M_e_REV'	'Meso-2,6-Diaminoheptanedioate exchange (reversible)'	251.574	0.000185654	-6.13196	-0.999999
'EX_acnam_e_REV'	'N-Acetylneuraminate exchange (reversible)'	274.444	0.000235979	-6.06558	-0.999999
'EX_amp_e_REV'	'AMP exchange (reversible)'	274.444	0.000233807	-6.0696	-0.999999
'EX_dha_e_REV'	'Dihydroxyacetone exchange (reversible)'	251.574	0.00018702	-6.12878	-0.999999
'EX_fuc__L_e_REV'	'L-Fucose exchange (reversible)'	1000	0.0152988	-4.81534	-0.999985
'EX_glyald_e_REV'	'D-Glyceraldehyde exchange (reversible)'	500	0.00764938	-4.81534	-0.999985
'EX_rmn_e_REV'	'L-Rhamnose exchange (reversible)'	500	0.00764938	-4.81534	-0.999985
'EX_ttdca_e_REV'	'Tetradecanoate (n-C14:0) exchange (reversible)'	500	0.00764938	-4.81534	-0.999985
'EX_glyclt_e_REV'	'Glycolate exchange (reversible)'	1000	0.0152988	-4.81534	-0.999985
'EX_g6p_e_REV'	'D-Glucose 6-phosphate exchange (reversible)'	1000	0.0152988	-4.81534	-0.999985
'EX_2ddglcn_e_REV'	'2-Dehydro-3-deoxy-D-gluconate exchange (reversible)'	500	0.00764938	-4.81534	-0.999985
'EX_galct__D_e_REV'	'D-Galactarate exchange (reversible)'	500	0.00764938	-4.81534	-0.999985
'EX_idon__L_e_REV'	'L-Idonate exchange (reversible)'	500	0.00764938	-4.81534	-0.999985
'EX_galur_e_REV'	'D-Galacturonate exchange (reversible)'	1000	0.305111	-3.51554	-0.999695
'EX_but_e_REV'	'Butyrate (n-C4:0) exchange (reversible)'	1000	0.0221304	-4.65501	-0.999978
'EX_gbbtn_e_REV'	'Gamma-butyrobetaine exchange (reversible)'	1000	0.157167	-3.80364	-0.999843
'EX_h2s_e_REV'	'Hydrogen sulfide exchange (reversible)'	628.19	0.000666327	-5.9744	-0.999999
'EX_gthrd_e_REV'	'Reduced glutathione exchange (reversible)'	1000	0.00369138	-5.43281	-0.999996
'EX_met__D_e_REV'	'D-Methionine exchange (reversible)'	1000	0.00328732	-5.48316	-0.999997
'EX_tartr__L_e_REV'	'L-tartrate exchange (reversible)'	999.876	0.00328739	-5.4831	-0.999997
'EX_taur_e_REV'	'Taurine exchange (reversible)'	499.105	1.45484e-05	-7.53538	-1
'EX_maltpt_e_REV'	'Maltopentaose exchange (reversible)'	499.141	7.25736e-05	-6.83745	-1
'EX_glcur_e_REV'	'D-Glucuronate exchange (reversible)'	499.141	5.80252e-05	-6.93461	-1
'EX_mmet_e_REV'	'S-Methyl-L-methionine exchange (reversible)'	500	0.00764938	-4.81534	-0.999985
'DM_amob_c_REV'	'Sink needed to allow S-Adenosyl-4-methylthio-2-oxobutanoate to leave system (reversible)'	500	0.00764938	-4.81534	-0.999985
'EX_mg2_e_REV'	'Mg exchange (reversible)'	500	0.00764938	-4.81534	-0.999985
'EX_acac_e_REV'	'Acetoacetate exchange (reversible)'	1000	0.0152988	-4.81534	-0.999985
'EX_adn_e_REV'	'Adenosine exchange (reversible)'	1000	0.0152988	-4.81534	-0.999985
'EX_nac_e_REV'	'Nicotinate exchange (reversible)'	998.209	0.00950508	-5.02127	-0.99999
'EX_ocdca_e_REV'	'Octadecanoate (n-C18:0) exchange (reversible)'	1000	0.0152988	-4.81534	-0.999985
'EX_dad_2_e_REV'	'Deoxyadenosine exchange (reversible)'	1000	0.0152988	-4.81534	-0.999985
'EX_ser__D_e_REV'	'D-Serine exchange (reversible)'	1000	0.0152634	-4.81635	-0.999985
'EX_galctn__D_e_REV'	'D-Galactonate exchange (reversible)'	998.209	0.00202311	-5.6932	-0.999998
'GLYCtex_REV'	'Glycerol transport via diffusion (extracellular to periplasm) (reversible)'	499.105	0.00110232	-5.65589	-0.999998
'GLYC3Ptex_REV'	'Glycerol-3-phosphate transport via diffusion (extracellular to periplasm) (reversible)'	1000	0.0139529	-4.85534	-0.999986
'GUAtex_REV'	'Guanine transport via diffusion (extracellular to periplasm) (reversible)'	1000	0.0260149	-4.58478	-0.999974
'Htex_REV'	'Proton transport via diffusion (extracellular to periplasm) (reversible)'	1000	0.0189895	-4.72149	-0.999981
'H2tex_REV'	'Hydrogen transport via diffusion (extracellular to periplasm) (reversible)'	998.209	1.48816e-05	-7.82657	-1
'H2Otex_REV'	'H2O transport via diffusion (extracellular to periplasm) (reversible)'	996.072	0.0845408	-4.07122	-0.999915
'O2tpp_REV'	'O2 transport via diffusion (periplasm) (reversible)'	1000	0.0282304	-4.54928	-0.999972
'12PPDStex_REV'	'(S)-Propane-1,2-diol transport via diffusion (extracellular to periplasm) (reversible)'	998.209	0.00950508	-5.02127	-0.99999
'ACtex_REV'	'Acetate transport via diffusion (extracellular to periplasm) (reversible)'	8.04133e-10	4.02066e-10	-0.301029	-0.499999
'ACALDtex_REV'	'Acetaldehyde transport via diffusion (extracellular to periplasm) (reversible)'	8.04107e-10	4.02066e-10	-0.301015	-0.499983
'ACMANAtex_REV'	'N-acetyl-D-mannosamine transport via diffusion (extracellular to periplasm) (reversible)'	1000	0.0181134	-4.742	-0.999982
'SUCFUMtpp_REV'	'Succinate:fumarate antiporter (periplasm) (reversible)'	3.7105e-08	1.85525e-08	-0.30103	-0.5
'TARTRt7pp_REV'	'Tartrate/succinate antiporter (periplasm) (reversible)'	1000	0.00508308	-5.29387	-0.999995
'EX_ca2_e_REV'	'Calcium exchange (reversible)'	1000	0.00508308	-5.29387	-0.999995
'EX_so3_e_REV'	'Sulfite exchange (reversible)'	1000	0.0120492	-4.91904	-0.999988
'AKGt2rpp_REV'	'2-oxoglutarate reversible transport via symport (periplasm) (reversible)'	1000	0.0282304	-4.54928	-0.999972
'EX_ascb__L_e_REV'	'L-Ascorbate exchange (reversible)'	1000	0.0207601	-4.68277	-0.999979
'EX_ala_B_e_REV'	'Beta-Alanine exchange (reversible)'	1000	0.152555	-3.81657	-0.999847
'EX_agm_e_REV'	'Agmatine exchange (reversible)'	1000	0.101704	-3.99266	-0.999898
'EX_octa_e_REV'	'Octanoate (n-C8:0) exchange (reversible)'	1000	0.152555	-3.81657	-0.999847
'EX_xylu__L_e_REV'	'L-Xylulose exchange (reversible)'	1000	0.0220573	-4.65645	-0.999978
'EX_gtp_e_REV'	'GTP exchange (reversible)'	580.444	0.000192491	-6.47935	-1
'TYRt2rpp_REV'	'L-tyrosine reversible transport via proton symport (periplasm) (reversible)'	1000	0.305111	-3.51554	-0.999695
'URIt2pp_copy2_REV'	' (reversible)'	1000	0.101704	-3.99266	-0.999898
'EX_fruur_e_REV'	'D-Fructuronate exchange (reversible)'	1000	0.305111	-3.51554	-0.999695
'GALtex_REV'	'D-galactose transport via diffusion (extracellular to periplasm) (reversible)'	1000	0.305111	-3.51554	-0.999695
'GALCTtex_REV'	'D-galactarte transport via diffusion (extracellular to periplasm) (reversible)'	993.798	0.0217648	-4.65954	-0.999978
'ACACt2pp_REV'	'Acetoacetate transport via proton symport (periplasm) (reversible)'	1000	0.021153	-4.67463	-0.999979
'EX_ch4_e_REV'	'EX ch4 LPAREN e RPAREN (reversible)'	1000	0.0230492	-4.63734	-0.999977
'CO2tpp_REV'	'CO2 transporter via diffusion (periplasm) (reversible)'	1000	6.78236e-05	-7.16862	-1
'DHAtpp_REV'	'Dihydroxyacetone transport via facilitated diffusion (periplasm) (reversible)'	1000	0	-18	-1
'ASNt2rpp_REV'	'L-asparagine reversible transport via proton symport (periplasm) (reversible)'	1000	6.74584e-05	-7.17096	-1
'HIStex_REV'	'L-histidine transport via diffusion (extracellular to periplasm) (reversible)'	993.798	0.00223984	-5.64708	-0.999998
'HYXNtex_REV'	'Hypoxanthine transport via diffusion (extracellular to periplasm) (reversible)'	787.163	0.00103354	-5.88174	-0.999999
'IDONtex_REV'	'L-idonate transport via diffusion (extracellular to periplasm) (reversible)'	1000	0.0152988	-4.81534	-0.999985
'ILEtex_REV'	'L-isoleucine transport via diffusion (extracellular to periplasm) (reversible)'	1000	0.0152988	-4.81534	-0.999985
'ACt2rpp_REV'	'Acetate reversible transport via proton symport (periplasm) (reversible)'	1000	6.78236e-05	-7.16862	-1
'EX_fe3dcit_e_REV'	'Fe(III)dicitrate exchange (reversible)'	1000	6.78236e-05	-7.16862	-1
'EX_fe3hox_e_REV'	'Fe(III)hydroxamate exchange (reversible)'	7.68521e-08	3.73708e-08	-0.313123	-0.51373
'EX_fecrm_e_REV'	'Ferrichrome exchange (reversible)'	1000	6.78236e-05	-7.16862	-1
'EX_feenter_e_REV'	'Fe-enterobactin exchange (reversible)'	983.951	0.00157572	-5.79549	-0.999998
'EX_feoxam_e_REV'	'Ferroxamine exchange (reversible)'	787.163	0.00103354	-5.88174	-0.999999
'EX_cbi_e_REV'	'Cobinamide exchange (reversible)'	499.105	0.00110232	-5.65589	-0.999998
'GLCURtex_REV'	'D-glucuronat transport via diffusion (extracellular to periplasm) (reversible)'	390.749	0.000149889	-6.41613	-1
'OCTAtex_REV'	'Octanoate transport via diffusion (extracellular to periplasm) (reversible)'	137.527	0.000188482	-5.86312	-0.999999
'EX_ni2_e_REV'	'Ni2+ exchange (reversible)'	248.449	0.000149889	-6.21947	-0.999999
'CYTDt2pp_copy2_REV'	' (reversible)'	485.561	0.0080665	-4.77956	-0.999983
'EX_meoh_e_REV'	'Methanol exchange (reversible)'	236.07	0.000154756	-6.18339	-0.999999
'PNTOtex_REV'	'Pantothenate transport via diffusion (extracellular to periplasm) (reversible)'	223.096	7.22481e-06	-7.48966	-1
'PPPNtex_REV'	'3-phenylpropionate transport via diffusion (extracellular to periplasm) (reversible)'	221.04	7.1602e-06	-7.48955	-1
'PPTtex_REV'	'Phosphonate transport via diffusion (extracellular to periplasm) (reversible)'	564.054	1.45484e-05	-7.58851	-1
'PTRCtex_REV'	'Putrescine transport via diffusion (extracellular to periplasm) (reversible)'	553.732	1.45484e-05	-7.58048	-1
'PYRtex_REV'	'Pyruvate transport via diffusion (extracellular to periplasm) (reversible)'	1000	0.0152988	-4.81534	-0.999985
'DSERtex_REV'	'D-serine transport via diffusion (extracellular to periplasm) (reversible)'	1000	0.0246519	-4.60815	-0.999975
'SERtex_REV'	'L-serine transport via diffusion (extracellular to periplasm) (reversible)'	1000	0.0246519	-4.60815	-0.999975
'SO4tex_REV'	'Sulfate transport via diffusion (extracellular to periplasm) (reversible)'	1000	0.0246519	-4.60815	-0.999975
'SPMDtex_REV'	'Spermidine transport via diffusion (extracellular to periplasm) (reversible)'	1000	6.79924e-05	-7.16754	-1
'TARTRtex_REV'	'Tartrate transport via diffusion (extracellular to periplasm) (reversible)'	2000	0.0115935	-5.23682	-0.999994
'TAURtex_REV'	'Taurine transport via diffusion (extracellular to periplasm) (reversible)'	9.96551e-07	4.84612e-07	-0.313106	-0.513711
'THRtex_REV'	'L-threonine transport via diffusion (extracellular to periplasm) (reversible)'	3.91727e-08	1.14546e-08	-0.534005	-0.707588
'MNLtex_REV'	'Mannitol transport via diffusion (extracellular to periplasm) (reversible)'	1000	0.024275	-4.61484	-0.999976
'NAtex_REV'	'Sodium transport via diffusion (extracellular to periplasm) (reversible)'	1000	0	-18	-1
'NACtex_REV'	'Nicotinic acid transport via diffusion (extracellular to periplasm) (reversible)'	1753.2	0.00329208	-5.72636	-0.999998
'BUTtex_REV'	'Butyrate transport via diffusion (extracellular to periplasm) (reversible)'	1000	0.0150522	-4.8224	-0.999985
'CO2tex_REV'	'CO2 transport via diffusion (extracellular to periplasm) (reversible)'	736.434	0.000244987	-6.47799	-1
'CRNtex_REV'	'L-carnitine transport via diffusion (extracellular to periplasm) (reversible)'	1000	0.152555	-3.81657	-0.999847
'DINStex_REV'	'Deoxyinosine transport via diffusion (extracellular to periplasm) (reversible)'	1000	0.152555	-3.81657	-0.999847
'CYStex_REV'	'L-cysteine transport via diffusion (extracellular to periplasm) (reversible)'	1000	45.2109	-1.34476	-0.954789
'CYTDtex_REV'	'Cytidine transport via diffusion (extracellular to periplasm) (reversible)'	1000	45.0452	-1.34635	-0.954955
'DCAtex_REV'	'Decanoate transport via diffusion (extracellular to periplasm) (reversible)'	1000	0.0268421	-4.57118	-0.999973
'DCYTtex_REV'	'Deoxycytidine transport via diffusion (extracellular to periplasm) (reversible)'	1000	0.0170312	-4.76876	-0.999983
'LYXtex_REV'	'L-Lyxose transport via diffusion (extracellular to periplasm) (reversible)'	1000	0.000395736	-6.40259	-1
'MANtex_REV'	'D-mannose transport via diffusion (extracellular to periplasm) (reversible)'	1000	0.000422661	-6.37401	-1
'DMSOtex_REV'	'Dimethyl sulfoxide transport via diffusion (extracellular to periplasm) (reversible)'	51.0855	2.2132e-05	-6.36328	-1
'FE2tex_REV'	'Iron (II) transport via diffusion (extracellular to periplasm) (reversible)'	1000	0.00766656	-5.1154	-0.999992
'NMNtex_REV'	'NMN transport via diffusion (extracellular to periplasm) (reversible)'	1000	0.00766656	-5.1154	-0.999992
'TREtex_REV'	'Trehalose transport via diffusion (extracellular to periplasm) (reversible)'	1000	0.0206906	-4.68423	-0.999979
'TRPtex_REV'	'L-tryptophan transport via diffusion (extracellular to periplasm) (reversible)'	282.027	7.25681e-06	-7.58955	-1
'TYRtex_REV'	'L-tyrosine transport via diffusion (extracellular to periplasm) (reversible)'	1559.83	0.0166172	-4.97252	-0.999989
'URAtex_REV'	'Uracil transport via diffusion (extracellular to periplasm) (reversible)'	2000	7.15642	-2.44633	-0.996422
'URItex_REV'	'Uridine transport via diffusion (extracellular to periplasm) (reversible)'	1000	0.0245258	-4.61038	-0.999975
'VALtex_REV'	'L-valine transport via diffusion (extracellular to periplasm) (reversible)'	1000	0.0245258	-4.61038	-0.999975
'XYLtex_REV'	'D-xylose transport via diffusion (extracellular to periplasm) (reversible)'	1000	0.021153	-4.67463	-0.999979
'ABUTtex_REV'	'4-aminobutyrate transport via diffusion (extracellular to periplasm) (reversible)'	2.87196e-09	8.27246e-11	-1.54054	-0.971195
'EX_mso3_e_REV'	'Methanesulfonate exchange (reversible)'	1000	0.00231	-5.63639	-0.999998
'EX_23cump_e_REV'	'2'',3''-Cyclic UMP exchange (reversible)'	1000	0.0071591	-5.14514	-0.999993
'23CUMPtex_REV'	'23cUMP transport via diffusion (extracellular to periplasm) (reversible)'	1000	0.0700711	-4.15446	-0.99993
'3AMPtex_REV'	'3AMP transport via diffusion (extracellular to periplasm) (reversible)'	1000	0.180967	-3.7424	-0.999819
'BUTSO3tex_REV'	'Butanesulfonate transport via diffusion (extracellular to periplasm) (reversible)'	1860.74	1005.89	-0.267138	-0.459417
'GALBDtex_REV'	'Beta D-galactose transport via diffusion (extracellular to periplasm) (reversible)'	209.413	0.000260938	-5.90447	-0.999999
'SULFACtex_REV'	'Sulfoaceate transport via diffusion (extracellular to periplasm) (reversible)'	431.06	0.00245944	-5.2437	-0.999994
'EX_butso3_e_REV'	'Butanesulfonate exchange (reversible)'	145.079	0.000185755	-5.89266	-0.999999
'NOtpp_REV'	'NO transport (diffusion) (reversible)'	1000	0.0172951	-4.76208	-0.999983
'N2Otpp_REV'	'Nitrious oxide transport (diffusion) (reversible)'	47.7626	7.52113e-06	-6.8028	-1
'CRNDt2rpp_REV'	'D-carnitine outward transport (H+ antiport) (reversible)'	1000	0.000710065	-6.1487	-0.999999
'CTBTt2rpp_REV'	'Cronobetaine outward transport (H+ antiport) (reversible)'	2.74439e-07	1.34056e-07	-0.31116	-0.511528
'PACALDt2rpp_REV'	'Phenylacetaldehyde reversible transport via proton symport (periplasm) (reversible)'	1994.22	0.0824102	-4.38379	-0.999959
'PEAMNtex_REV'	'Phenethylamine transport via diffusion (extracellular to periplasm) (reversible)'	1000	0.0246519	-4.60815	-0.999975
'PACALDtex_REV'	'Phenethylacetaldehyde transport via diffusion (extracellular to periplasm) (reversible)'	1000	0.0010963	-5.96007	-0.999999
'CYANtex_REV'	'Cyanide transport via diffusion (extracellular to periplasm) (reversible)'	431.06	0.00203879	-5.32517	-0.999995
'SO3tex_REV'	'Sulfite transport via diffusion (extracellular to periplasm) (reversible)'	999.976	0.0105217	-4.9779	-0.999989
'TCYNTtex_REV'	'Thiocyanate transport via diffusion (extracellular to periplasm) (reversible)'	390.749	2.53681e-05	-7.18761	-1
'METSOX1tex_REV'	'L-methionine S-oxide diffusion (extracellular) (reversible)'	1000	0.305111	-3.51554	-0.999695
'METSOX2tex_REV'	'L-methionine R-oxide diffusion (extracellular) (reversible)'	273.314	7.2544e-06	-7.57606	-1
'3GMPtex_REV'	'3GMP transport via diffusion (extracellular to periplasm) (reversible)'	1000	0.152555	-3.81657	-0.999847
'FALDtpp_REV'	'Formaldehyde transport via diffusion (periplasm) (reversible)'	1000	6.74584e-05	-7.17096	-1
'EX_imp_e_REV'	'IMP exchange (reversible)'	998.209	0.00534085	-5.27161	-0.999995
'DOPAtex_REV'	'Dopamine transport via diffusion (extracellular to periplasm) (reversible)'	993.14	0.0311088	-4.50413	-0.999969
'4HOXPACDtex_REV'	'4-hydroxyphenylacetaldehyde transport via diffusion (extracellular to periplasm) (reversible)'	1000	0.0248255	-4.6051	-0.999975
'G3PStex_REV'	'Glycerophosphserine transport via diffusion (extracellular to periplasm) (reversible)'	999.101	0.00118737	-5.92502	-0.999999
'GLCUR1Ptex_REV'	'D-glucuronate 1-phosphate transport via diffusion (extracellular to periplasm) (reversible)'	1000	0.0412568	-4.3845	-0.999959
'UDPGLCURtex_REV'	'UDP-D-glucuronate transport via diffusion (extracellular to periplasm) (reversible)'	1000	1.9308	-2.71426	-0.998069
'UDPGtex_REV'	'UDPglucose transport via diffusion (extracellular to periplasm) (reversible)'	274.444	0.000233762	-6.06968	-0.999999
'UDPGALtex_REV'	'UDPgalactose transport via diffusion (extracellular to periplasm) (reversible)'	998.209	0.000589532	-6.22871	-0.999999
'ACGAM1Ptex_REV'	'N-acetyl-D-glucosamine 1-phosphate transport via diffusion (extracellular to periplasm) (reversible)'	999.876	0.00367693	-5.43446	-0.999996
'MSO3tex_REV'	'Methanesulfonate transport via diffusion (extracellular to periplasm) (reversible)'	332.736	0.000203635	-6.21325	-0.999999
'R5Ptex_REV'	'Ribose 5-phosphate transport via diffusion (extracellular to periplasm) (reversible)'	367.871	8.02568e-05	-6.66121	-1
'CITtex_REV'	'Citrate transport via diffusion (extracellular to periplasm) (reversible)'	1000	0.0152988	-4.81534	-0.999985
'EX_cd2_e_REV'	'Cadmium exchange (reversible)'	1000	0.0884363	-4.05337	-0.999912
'G6Ptex_REV'	'Glucose 6-phosphate transport via diffusion (extracellular to periplasm) (reversible)'	628.048	0.000262335	-6.37914	-1
'NI2tex_REV'	'Nickel transport via diffusion (extracellular to periplasm) (reversible)'	524.241	0.00281519	-5.27002	-0.999995
'L_LACt2rpp_REV'	'L-lactate reversible transport via proton symport (periplasm) (reversible)'	700.56	0.000196399	-6.55231	-1
'EX_fe3hox_un_e_REV'	'Fe(III)hydoxamate, unloaded exchange (reversible)'	0.000384299	0.000384237	-7.05918e-05	-0.00016253
'EX_23dappa_e_REV'	'2,3-diaminopropionate exchange (reversible)'	209.413	0.000260938	-5.90447	-0.999999
'NH4tpp_REV'	'Ammonia reversible transport (periplasm) (reversible)'	993.798	1987.6	0.30103	1
'NO2t2rpp_REV'	'Nitrite transport in via proton symport, reversible (periplasm) (reversible)'	1998.21	0.0146445	-5.13497	-0.999993
'PROt2rpp_REV'	'L-proline reversible transport via proton symport (periplasm) (reversible)'	998.209	0.0124072	-4.90555	-0.999988
'EX_fecrm_un_e_REV'	'Ferrichrome minus Fe(III) exchange (reversible)'	1000	0.012564	-4.90087	-0.999987
'EX_cgly_e_REV'	'Cys-Gly exchange (reversible)'	1000	0.305111	-3.51554	-0.999695
'EX_h2o2_e_REV'	'Hydrogen peroxide exchange (reversible)'	139.252	4.85084e-05	-6.45799	-1
'EX_ump_e_REV'	'UMP exchange (reversible)'	7.74269e-08	0.000205665	3.42427	2655.25
'EX_pydam_e_REV'	'Pyridoxamine exchange (reversible)'	869.8	0.00123359	-5.84825	-0.999999
'ADEtex_REV'	'Adenine transport via diffusion (extracellular to periplasm) (reversible)'	101.876	9.30376e-05	-6.03941	-0.999999
'ADNtex_REV'	'Adenosine transport via diffusion (extracellular to periplasm) (reversible)'	332.736	0.000205628	-6.20902	-0.999999
'AMPtex_REV'	'AMP transport via diffusion (extracellular to periplasm) (reversible)'	1000	0.000256148	-6.59151	-1
'ARBtex_REV'	'L-arabinose transport via diffusion (extracellular to periplasm) (reversible)'	1000	0.305111	-3.51554	-0.999695
'ASCBtex_REV'	'L-ascorbate transport via diffusion (extracellular to periplasm) (reversible)'	274.444	0.000235979	-6.06558	-0.999999
'MMETtex_REV'	'S-methyl-L-methionine transport via diffusion (extracellular to periplasm) (reversible)'	267.37	0.000630671	-5.62731	-0.999998
'MG2tex_REV'	'Magnesium (Mg+2) transport via diffusion (extracellular to periplasm) (reversible)'	191.61	0.00058634	-5.51427	-0.999997
'Zn2tex_REV'	'Zinc (Zn+2) transport via diffusion (extracellular to periplasm) (reversible)'	250.825	0.00494718	-4.70501	-0.99998
'CD2tex_REV'	'Cadmium (Cd+2) transport via diffusion (extracellular to periplasm) (reversible)'	250.825	0.00497511	-4.70257	-0.99998
'GLYALDtpp_REV'	'Glyceraldehyde facilitated diffusion (periplasm) (reversible)'	8.04107e-10	2000	12.3957	2.48723e+12
'EX_etha_e_REV'	'Ethanolamine exchange (reversible)'	628.048	1999.71	0.502974	2.18401
'ASO3tex_REV'	'Arsenite transport via diffusion (extracellular to periplasm) (reversible)'	503.148	0.000159309	-6.49945	-1
'MANGLYCtex_REV'	'2-O-alpha-mannosyl-D-glycerate transport via diffusion (extracellular to periplasm) (reversible)'	999.101	0.00126472	-5.89762	-0.999999
'EX_frulys_e_REV'	'Fructoselysine exchange (reversible)'	998.209	0.00359937	-5.443	-0.999996
'GLYCAtex_REV'	'D-glycerate transport via diffusion (extracellular to periplasm) (reversible)'	1000	1.34056e-07	-9.87271	-1
'EX_hacolipa_e_REV'	'Hepta-acylated core oligosaccharide lipid A (E. coli) exchange (reversible)'	628.048	0.000262335	-6.37914	-1
'HISt2rpp_REV'	'L-histidine reversible transport via proton symport (periplasm) (reversible)'	998.209	2.82962e-05	-7.54749	-1
'DIMPtex_REV'	'DIMP transport via diffusion (extracellular to periplasm) (reversible)'	999.86	0.00289372	-5.53848	-0.999997
'GLCRt2rpp_REV'	'D-glucarate transport via proton symport, reversible (periplasm) (reversible)'	1000	0.00778947	-5.10849	-0.999992
'EX_h2o_e_REV'	'H2O exchange (reversible)'	999.86	0.00289372	-5.53848	-0.999997
'EX_ala__D_e_REV'	'D-Alanine exchange (reversible)'	1.14888e-06	1.14868e-06	-7.37931e-05	-0.0001699
'UREAtpp_REV'	'Urea transport via facilitate diffusion (periplasm) (reversible)'	2.2423e-05	1999.78	7.95029	8.91841e+07
'PTRCORNt7pp_REV'	'Putrescine/ornithine antiporter (periplasm) (reversible)'	1000	0.152555	-3.81657	-0.999847
'EX_no2_e_REV'	'Nitrite exchange (reversible)'	736.434	0.000244987	-6.47799	-1
'ACACtex_REV'	'Acetoacetate transport via diffusion (extracellular to periplasm) (reversible)'	998.209	0.000432591	-6.36314	-1
'ACNAMtex_REV'	'N-acetylneuraminate transport via diffusion (extracellular to periplasm) (reversible)'	1000	0.000578445	-6.23774	-0.999999
'H2Stex_REV'	'H2s transport via diffusion (extracellular to periplasm) (reversible)'	1000	2000	0.30103	1
'EX_ddca_e_REV'	'Dodecanoate (n-C12:0) exchange (reversible)'	1000	0.0152988	-4.81534	-0.999985
'EX_r5p_e_REV'	'Alpha-D-Ribose 5-phosphate exchange (reversible)'	999.984	0.0101292	-4.99442	-0.99999
'EX_glyc2p_e_REV'	'Glycerol 2-phosphate exchange (reversible)'	5.9793e-07	2.90767e-07	-0.313106	-0.513711
'4PEPTtex_REV'	'LalaDgluMdapDala (pentapeptide) transport via diffusion (extracellular to periplasm) (reversible)'	817.139	0.000888179	-5.9638	-0.999999
'EX_gam_e_REV'	'D-Glucosamine exchange (reversible)'	1000	0.0246519	-4.60815	-0.999975
'EX_mobd_e_REV'	'Molybdate exchange (reversible)'	1000	0.152555	-3.81657	-0.999847
'EX_so4_e_REV'	'Sulfate exchange (reversible)'	251.574	0.00018702	-6.12878	-0.999999
'EX_phe__L_e_REV'	'L-Phenylalanine exchange (reversible)'	2000	0.295228	-3.83087	-0.999852
'EX_thr__L_e_REV'	'L-Threonine exchange (reversible)'	1000	0.038873	-4.41035	-0.999961
'EX_halipa_e_REV'	'Hepta-acylated KDO(2)-lipid (A) exchange (reversible)'	7.74269e-08	3.76554e-08	-0.313065	-0.513666
'EX_malthx_e_REV'	'Maltohexaose exchange (reversible)'	250.825	0.00497511	-4.70257	-0.99998
'EX_csn_e_REV'	'Cytosine exchange (reversible)'	1000	0.00766656	-5.1154	-0.999992
'EX_na1_e_REV'	'Sodium exchange (reversible)'	998.318	0.00157572	-5.80179	-0.999998
'ARGORNt7pp_REV'	'Arginine/ornithine antiporter (periplasm) (reversible)'	1000	0.000628757	-6.20152	-0.999999
'EX_dmso_e_REV'	'Dimethyl sulfoxide exchange (reversible)'	263.062	0.000260938	-6.00352	-0.999999
'EX_acgam1p_e_REV'	'N-Acetyl-D-glucosamine 1-phosphate exchange (reversible)'	516.397	0.000743039	-5.84197	-0.999999
'CU2tex_REV'	'Copper (Cu+2) transport via diffusion (extracellular to periplasm) (reversible)'	1000	0.0116227	-4.93469	-0.999988
'CLtex_REV'	'Chloride (Cl-1) transport via diffusion (extracellular to periplasm) (reversible)'	2000	0.498265	-3.60357	-0.999751
'EX_glcur1p_e_REV'	'D-Glucuronate 1-phosphate exchange (reversible)'	2000	0.0722644	-4.44211	-0.999964
'EX_thrp_e_REV'	'L-Threonine O-3-phosphate exchange (reversible)'	1018.24	0.00792791	-5.10869	-0.999992
'EX_pydxn_e_REV'	'Pyridoxine exchange (reversible)'	0.000384299	0.000384236	-7.07216e-05	-0.000162829
'EX_cys__L_e_REV'	'L-Cysteine exchange (reversible)'	1000	0.000710065	-6.1487	-0.999999
'EX_gsn_e_REV'	'Guanosine exchange (reversible)'	705.371	0.00081136	-5.9392	-0.999999
'EX_orot_e_REV'	'Orotate exchange (reversible)'	178.863	0.000187063	-5.98053	-0.999999
'PROtex_REV'	'L-proline transport via diffusion (extracellular to periplasm) (reversible)'	482.215	0.00203928	-5.37376	-0.999996
'SBTtex_REV'	'D-sorbitol transport via diffusion (extracellular to periplasm) (reversible)'	1000	0.0152988	-4.81534	-0.999985
'AKGtex_REV'	'Alpha-ketoglutarate transport via diffusion (extracellular to periplasm) (reversible)'	1000	0.0181711	-4.74062	-0.999982
'ALLTNtex_REV'	'Allantoin transport via diffusion (extracellular to periplasm) (reversible)'	1000	252.409	-0.597895	-0.747591
'EX_gal_bD_e_REV'	'Beta D-Galactose exchange (reversible)'	274.444	0.000233807	-6.0696	-0.999999
'EX_dump_e_REV'	'DUMP exchange (reversible)'	274.444	0.000233807	-6.0696	-0.999999
'EX_ag_e_REV'	'Silver exchange (reversible)'	1000	0.0884363	-4.05337	-0.999912
'EX_cys__D_e_REV'	'D-Cysteine exchange (reversible)'	1000	0.000628757	-6.20152	-0.999999
'EX_acser_e_REV'	'O-Acetyl-L-serine exchange (reversible)'	1000	0.000628757	-6.20152	-0.999999
'TYMtex_REV'	'Tyramine transport via diffusion (extracellular to periplasm) (reversible)'	858.818	0.000431818	-6.2986	-0.999999
'EX_g3pe_e_REV'	'Sn-Glycero-3-phosphoethanolamine exchange (reversible)'	1000	0.152555	-3.81657	-0.999847
'3PEPTtex_REV'	'LalaDgluMdap (tripeptide) transport via diffusion (extracellular to periplasm) (reversible)'	1000	0.00309267	-5.50967	-0.999997
'ANHGMtex_REV'	'GlcNAc-anhMurNAc transport via diffusion (extracellular to periplasm) (reversible)'	1000	0.000578445	-6.23774	-0.999999
'FALDtex_REV'	'Formaldehyde transport via diffusion (extracellular to periplasm) (reversible)'	999.101	0.00246007	-5.60866	-0.999998
'EX_acgal_e_REV'	'N-Acetyl-D-galactosamine exchange (reversible)'	753.199	0.000302728	-6.39586	-1
'G3PCtex_REV'	'Glycero-3-phosphocholine transport via diffusion (extracellular to periplasm) (reversible)'	115.764	9.42392e-05	-6.08934	-0.999999
'EX_acgal1p_e_REV'	'N-Acetyl-D-galactosamine 1-phosphate exchange (reversible)'	143.288	0.000152324	-5.97344	-0.999999
'EX_udpgal_e_REV'	'UDPgalactose exchange (reversible)'	12.7714	5.53292e-06	-6.36328	-1
'EX_14glucan_e_REV'	'1,4-alpha-D-glucan exchange (reversible)'	1000	0.00236945	-5.62535	-0.999998
'EX_aso3_e_REV'	'Arsenite exchange (reversible)'	1000	0.00194698	-5.71064	-0.999998
'EX_tcynt_e_REV'	'Thiocyanate exchange (reversible)'	12.7714	5.53292e-06	-6.36328	-1
'EX_g3pc_e_REV'	'Sn-Glycero-3-phosphocholine exchange (reversible)'	553.472	0.000194185	-6.45488	-1
'EX_34dhpac_e_REV'	'3,4-Dihydroxyphenylacetaldehyde exchange (reversible)'	217.99	7.24027e-06	-7.47868	-1
'DAMPtex_REV'	'DAMP transport via diffusion (extracellular to periplasm) (reversible)'	212.991	7.17689e-06	-7.47242	-1
'DGMPtex_REV'	'DGMP transport via diffusion (extracellular to periplasm) (reversible)'	12.7714	5.53292e-06	-6.36328	-1
'DTMPtex_REV'	'DTMP transport via diffusion (extracellular to periplasm) (reversible)'	12.7714	5.53292e-06	-6.36328	-1
'GMPtex_REV'	'GMP transport via diffusion (extracellular to periplasm) (reversible)'	1000	0.023333	-4.63203	-0.999977
'IMPtex_REV'	'IMP transport via diffusion (extracellular to periplasm) (reversible)'	12.7714	5.53292e-06	-6.36328	-1
'UMPtex_REV'	'UMP transport via diffusion (extracellular to periplasm) (reversible)'	12.7714	5.53292e-06	-6.36328	-1
'EX_cl_e_REV'	'Chloride exchange (reversible)'	1000	0.0288834	-4.53935	-0.999971
'23DAPPAtex_REV'	'2,3-diaminopropionate transport via diffusion (reversible)'	1000	0.305111	-3.51554	-0.999695
'EX_man6p_e_REV'	'D-Mannose 6-phosphate exchange (reversible)'	1000	0.305111	-3.51554	-0.999695
'EX_maltttr_e_REV'	'Maltotetraose exchange (reversible)'	12.7714	5.53292e-06	-6.36328	-1
'EX_lipoate_e_REV'	'Lipoate exchange (reversible)'	12.7714	5.53292e-06	-6.36328	-1
'EX_pydx_e_REV'	'Pyridoxal exchange (reversible)'	12.7714	5.53292e-06	-6.36328	-1
'GLCtex_copy2_REV'	' (reversible)'	1000	0.0187511	-4.72697	-0.999981
'12PPDRtpp_REV'	'(R)-Propane-1,2-diol facilitated transport (periplasm) (reversible)'	43.9265	2.40383e-05	-6.26182	-0.999999
'CA2tex_REV'	'Calcium (Ca+2) transport via diffusion (extracellular to periplasm) (reversible)'	274.444	0.000235979	-6.06558	-0.999999
'CUtex_REV'	'Copper (Cu+1) transport via diffusion (extracellular to periplasm) (reversible)'	800.392	0.00426833	-5.27305	-0.999995
'12PPDRtex_REV'	'(R)-Propane-1,2-diol transport via diffusion (extracellular to periplasm) (reversible)'	800.392	0.00426833	-5.27305	-0.999995
'ACONIs_REV'	'Aconitate isomerase (spontaneous) (reversible)'	1000	0.126387	-3.8983	-0.999874
'PPALtpp_REV'	'Propanal transport via channel (periplasm) (reversible)'	2.56174e-08	1.28087e-08	-0.30103	-0.5
'EX_12ppd__R_e_REV'	'(R)-Propane-1,2-diol exchange (reversible)'	1000	0.0243443	-4.6136	-0.999976
'CGLYtex_REV'	'L-Cysteinylglycine transport via diffusion (extracellular to periplasm) (reversible)'	715.035	0.000746023	-5.98158	-0.999999
'EX_urate_e_REV'	'Urate exchange (reversible)'	715.035	0.000746023	-5.98158	-0.999999
'GTHOXtex_REV'	'Glutathione (ox) transport via diffusion (extracellular to periplasm) (reversible)'	1000	0.0219836	-4.6579	-0.999978
'EX_cpgn_un_e_REV'	'Coprogen unloaded (no Fe(III)) exchange (reversible)'	1000	0.0291929	-4.53472	-0.999971
'GTHRDtex_REV'	'Glutathione transport via diffusion (extracellular to periplasm) (reversible)'	252.774	0.0002092	-6.08217	-0.999999
'EX_crn__D_e_REV'	'D-carnitine exchange (reversible)'	269.543	1.38092e-05	-7.29046	-1
'EX_psclys_e_REV'	'Psicoselysine exchange (reversible)'	264.791	1.38092e-05	-7.28274	-1
'TUNGStex_REV'	'Tungstate transport via diffusion (extracellular to periplasm) (reversible)'	268.458	1.40521e-05	-7.28114	-1
'DM_aacald_c_REV'	'Sink needed to allow aminoacetaldehyde to leave system (reversible)'	266.205	1.40521e-05	-7.27748	-1
'CAt6pp_REV'	'Calcium / sodium antiporter (1:1) (reversible)'	499.105	1.45484e-05	-7.53538	-1
'5DGLCNt2rpp_REV'	'5-Dehydro-D-gluconate transport via proton symport, reversible (periplasm) (reversible)'	998.209	2.82962e-05	-7.54749	-1
'GALCTNLtex_REV'	'L-galactonate transport via diffusion (extracellular to periplasm) (reversible)'	998.209	0.000255883	-6.59118	-1
'EX_galctn__L_e_REV'	'L-Galactonate exchange (reversible)'	216.032	7.22889e-06	-7.47545	-1
'5DGLCNtex_REV'	'5-Dehydro-D-gluconate transport via diffusion (extracellular to periplasm) (reversible)'	1000	45.0452	-1.34635	-0.954955
'EX_5dglcn_e_REV'	'5-Dehydro-D-gluconate exchange (reversible)'	1000	45.0452	-1.34635	-0.954955
'PPAtex_REV'	'Propionate transport via diffusion (reversible)'	269.652	1.38092e-05	-7.29064	-1
'PSCLYStex_REV'	'Psicoselysine transporter via diffusion (extracellular) (reversible)'	266.967	1.38092e-05	-7.28629	-1
'THYMtex_REV'	'Thymine transport via diffusion (extracellular to periplasm) (reversible)'	264.918	1.38092e-05	-7.28294	-1
'MG2t3_2pp_REV'	'Magnesium (Mg+2) transport in/out via proton antiport (periplasm) (reversible)'	265.864	1.40521e-05	-7.27692	-1
'EX_ppal_e_REV'	'Propanal exchange (reversible)'	271.392	1.40521e-05	-7.28586	-1
'EX_slnt_e_REV'	'Selenite exchange (reversible)'	373.51	1.41481e-05	-7.4216	-1
'RFAMPtex_REV'	'Rifampin transport via diffusion (extracellular to periplasm) (reversible)'	499.105	1.45484e-05	-7.53538	-1
'MINCYCtex_REV'	'Minocycline transport via diffusion (extracellular to periplasm) (reversible)'	0.00137233	0.00137219	-4.61266e-05	-0.000106205
'DOXRBCNtex_REV'	'Doxorubicin transport via diffusion (extracellular to periplasm) (reversible)'	499.105	1.45484e-05	-7.53538	-1
'ETOHtrpp_REV'	'Ethanol reversible transport via diffusion (periplasm) (reversible)'	499.105	1.45484e-05	-7.53538	-1
'LALALGLUtex_REV'	'L-alanyl-L-glutamate transport via diffusion (extracellular to periplasm) (reversible)'	499.105	1.45484e-05	-7.53538	-1
'5MTRtex_REV'	'5-Methylthio-D-ribose transport via proton diffusion (extracellular to periplasm) (reversible)'	499.105	1.45484e-05	-7.53538	-1
'LALADGLUtex_REV'	'L-alanyl-D-glutamate transport via diffusion (extracellular to periplasm) (reversible)'	499.105	1.45484e-05	-7.53538	-1
'3HPPtex_REV'	'3-hydroxypropionate transport via diffusion (extracellular to periplasm) (reversible)'	998.209	0.000197858	-6.70287	-1
'EX_LalaDglu_e_REV'	'L-alanine-D-glutamate exchange (reversible)'	998.209	0.000197858	-6.70287	-1
'EX_LalaLglu_e_REV'	'L-alanine-L-glutamate exchange (reversible)'	1000	0.0197049	-4.70543	-0.99998
'EX_ttrcyc_e_REV'	'Tetracycline exchange (reversible)'	499.105	1.45484e-05	-7.53538	-1
'DM_4crsol_c_REV'	'Sink needed to allow p-Cresol to leave system (reversible)'	514.296	0.000132019	-6.59058	-1
'EX_cm_e_REV'	'Chloramphenicol exchange (reversible)'	0.000384299	0.000384258	-4.69646e-05	-0.000108134
'EX_novbcn_e_REV'	'Novobiocin exchange (reversible)'	209.413	0.000260938	-5.90447	-0.999999
'FUSAtex_REV'	'Fusidic acid transport via diffusion (extracellular to periplasm) (reversible)'	2000	2.33806	-2.93217	-0.998831
'EX_rfamp_e_REV'	'Rifampin exchange (reversible)'	1000	0.00369762	-5.43208	-0.999996
'QUIN2tex_REV'	'Quinate transport via diffusion (extracellular to periplasm) (reversible)'	736.434	0.000207987	-6.5491	-1
'EX_quin_e_REV'	'Quinate exchange (reversible)'	2.56174e-08	1.28087e-08	-0.30103	-0.5
'EX_3hpp_e_REV'	'3-Hydroxypropanoate exchange (reversible)'	199.94	1.44701e-05	-7.14043	-1
'DM_mththf_c_REV'	'Sink needed to allow (2R,4S)-2-methyl-2,3,3,4-tetrahydroxytetrahydrofuran to leave system (reversible)'	221.888	0.000221567	-6.00063	-0.999999
'MEOHtrpp_REV'	'Methanol reversible transport via diffusion (periplasm) (reversible)'	543.551	1.45484e-05	-7.57242	-1
'SELtex_REV'	'Selenate transport via diffusion (extracellular to periplasm) (reversible)'	333.233	1.45114e-05	-7.36104	-1
'MEOHtex_REV'	'Methanol transport via diffusion (extracellular to periplasm) (reversible)'	514.229	5.80252e-05	-6.94754	-1
'EX_5mtr_e_REV'	'5-Methylthio-D-ribose exchange (reversible)'	333.233	1.45112e-05	-7.36104	-1
'TTRCYCtex_REV'	'Tetracycline transport via diffusion (extracellular to periplasm) (reversible)'	514.229	5.80252e-05	-6.94754	-1
'SLNTtex_REV'	'Selenite transport via diffusion (extracellular to periplasm) (reversible)'	998.209	0.00545825	-5.26217	-0.999995
'CH4tex_REV'	'Methane Transport(extracellular via diffusion) (reversible)'	998.209	0.00545825	-5.26217	-0.999995
'TARTRDtex_REV'	'D-tartrate transport via diffusion (extracellular to periplasm) (reversible)'	998.209	0.00545825	-5.26217	-0.999995
'BTNtex_REV'	'Biotin transport via diffusion (extracellular to periplasm) (reversible)'	998.209	0.00545825	-5.26217	-0.999995
'EX_arbt_e_REV'	'Arbutin exchange (reversible)'	611.974	0.000695423	-5.94448	-0.999999
'DMSOtpp_REV'	'Dimethyl sulfoxide transport via diffusion (periplasm) (reversible)'	269.543	1.38092e-05	-7.29046	-1
'PYDXtex_REV'	'Pyridoxal transport via diffusion (extracellular) (reversible)'	499.105	1.45484e-05	-7.53538	-1
'SUCASPtpp_REV'	'Succinate:aspartate antiporter (periplasm) (reversible)'	499.105	1.45484e-05	-7.53538	-1
'SUCMALtpp_REV'	'Succinate:malate antiporter (periplasm) (reversible)'	503.416	5.80252e-05	-6.93831	-1
'PYDXNtex_REV'	'Pyridoxine transport via diffusion (extracellular) (reversible)'	410.011	2.90126e-05	-7.15021	-1
'PYDAMtex_REV'	'Pyridoxamine transport via diffusion (extracellular) (reversible)'	1000	0.0197049	-4.70543	-0.99998
'SUCTARTtpp_REV'	'Succinate:D-tartrate antiporter (periplasm) (reversible)'	499.105	1.45484e-05	-7.53538	-1
'CHTBStex_REV'	'Chitobiose transport via diffusion (extracellular to periplasm) (reversible)'	1000	0.0227873	-4.64231	-0.999977
'CRNDtex_REV'	'D-carnitine transport via diffusion (extracellular to periplasm) (reversible)'	333.233	1.45114e-05	-7.36104	-1
'DXYLONtpp_REV'	'D-xylonate reversible tranposrt (periplasm) (reversible)'	333.233	1.45114e-05	-7.36104	-1
'PSURItex_REV'	'Pseudouridine transport via diffusion (extracellular to periplasm) (reversible)'	1000	0.305111	-3.51554	-0.999695
'DHPStex_REV'	'2,3-dihydroxypropane 1-sulfonate transport via diffusion (reversible)'	499.148	5.80252e-05	-6.93461	-1
'FMNtex_REV'	'FMN transport, outer membrane (reversible)'	499.148	7.25736e-05	-6.83745	-1
'EX_mththf_e_REV'	'(2R,4S)-2-methyl-2,3,3,4-tetrahydroxytetrahydrofuran exchange (reversible)'	999.984	0.0101292	-4.99442	-0.99999
'4ABZGLUtr_REV'	'P-aminobenzoyl glutamate:H+ symporter (reversible)'	499.105	1.45484e-05	-7.53538	-1
'GLYtpp_REV'	'Glycine transport via facillitated diffusion (reversible)'	499.105	1.45484e-05	-7.53538	-1
'FADtex_REV'	'FAD transport, outer membrane (reversible)'	499.105	1.45484e-05	-7.53538	-1
'2DGLCtex_REV'	'2-Deoxy-D-glucose transport via diffusion (extracellular) (reversible)'	499.105	1.45484e-05	-7.53538	-1
'SQtex_REV'	'Sulphoquinovose transport via diffusion (reversible)'	499.105	1.45484e-05	-7.53538	-1
'EX_dhps_e_REV'	'2,3-Dihydroxypropane-1-sulfonate exchange (reversible)'	499.105	1.45484e-05	-7.53538	-1
'URATEtex_REV'	'Uric acid transport (reversible)'	274.444	0.000235899	-6.06573	-0.999999
'EX_cs1_e_REV'	'Cesium ion exchange (reversible)'	1000	0.000859239	-6.06589	-0.999999
'EX_mepn_e_REV'	'Methylphosphonic acid exchange (reversible)'	214.746	7.16407e-06	-7.47677	-1
'Ftex_REV'	'Fluoride transport via diffusion (reversible)'	499.105	1.45484e-05	-7.53538	-1
'CS1tex_REV'	'Cesium transport via diffusion (reversible)'	1000	0.011706	-4.93159	-0.999988
'MEPNtex_REV'	'Methylphosphonic acid transport via diffusion (extracellular to periplasm) (reversible)'	499.105	1.45484e-05	-7.53538	-1
'EX_4abzglu_e_REV'	'4-aminobenzoyl-glutamate exchange (reversible)'	499.105	1.45484e-05	-7.53538	-1
'4ABZGLUtex_REV'	'P-aminobenzoyl glutamate transport via diffusion (extracellular to periplasm) (reversible)'	499.105	1.45484e-05	-7.53538	-1
'EX_metglcur_e_REV'	'1-O-methyl-Beta-D-glucuronate exchange (reversible)'	499.105	1.45484e-05	-7.53538	-1
'METGLCURtex_REV'	'1-O-methyl-Beta-D-glucuronate via diffusion (extracellular) (reversible)'	499.105	1.45484e-05	-7.53538	-1
'AI2tex_REV'	'Ai2 transport, outer membrane (reversible)'	499.105	1.45484e-05	-7.53538	-1
'EX_2dglc_e_REV'	'2-Deoxy-D-glucose exchange (reversible)'	499.105	1.45484e-05	-7.53538	-1
'ASPtpp_REV'	'L-aspartate uptake via facillitated diffusion (reversible)'	499.105	1.45484e-05	-7.53538	-1
'FUMt1pp_REV'	'Fumarate transport via diffusion in (periplasm) (reversible)'	499.105	1.45484e-05	-7.53538	-1
'SUCCt1pp_REV'	'Succinate transport via diffusion in (periplasm) (reversible)'	499.105	1.45484e-05	-7.53538	-1
'DHORD5No1'	'Dihydroorotic acid (menaquinone-8) (No1)'	611.974	0.000695423	-5.94448	-0.999999
'GLYCTO2No1'	'Glycolate oxidase (No1)'	611.974	0.000695423	-5.94448	-0.999999
'GLYCTO3No1'	'Glycolate oxidase (No1)'	611.974	0.000695423	-5.94448	-0.999999
'GLYCTO4No1'	'Glycolate oxidase (No1)'	512.739	0.000693842	-5.86864	-0.999999
'PFK_3No1'	'Phosphofructokinase (s7p) (No1)'	512.739	0.000693842	-5.86864	-0.999999
'TRPS2No1'	'Tryptophan synthase (indole) (No1)'	512.739	0.000693842	-5.86864	-0.999999
'arm_G3PD5'	'Glycerol-3-phosphate dehydrogenase (ubiquinone-8) (arm)'	1000	0.0104451	-4.98109	-0.99999
'G3PD5No1'	'Glycerol-3-phosphate dehydrogenase (ubiquinone-8) (No1)'	499.105	1.45484e-05	-7.53538	-1
'G3PD5No2'	'Glycerol-3-phosphate dehydrogenase (ubiquinone-8) (No2)'	611.974	0.000695423	-5.94448	-0.999999
'LEUTAiNo2'	'Leucine transaminase (irreversible) (No2)'	499.105	1.45484e-05	-7.53538	-1
'DB4PSNo1'	'3,4-Dihydroxy-2-butanone-4-phosphate synthase (No1)'	558.381	1.45484e-05	-7.58412	-1
'RBFKNo1'	'Riboflavin kinase (No1)'	549.901	1.45484e-05	-7.57747	-1
'arm_ACP1_FMN'	'Acid phosphatase (FMN) (arm)'	1000	0.0104451	-4.98109	-0.99999
'ACP1_FMNNo1'	'Acid phosphatase (FMN) (No1)'	1000	0.0104451	-4.98109	-0.99999
'ACP1_FMNNo2'	'Acid phosphatase (FMN) (No2)'	1000	0.0104451	-4.98109	-0.99999
'ACP1_FMNNo3'	'Acid phosphatase (FMN) (No3)'	512.739	0.000693842	-5.86864	-0.999999
'RBFSbNo1'	'Riboflavin synthase (No1)'	512.739	0.000693842	-5.86864	-0.999999
'DMATTNo1'	'Dimethylallyltranstransferase (No1)'	512.739	0.000693842	-5.86864	-0.999999
'GRTTNo1'	'Geranyltranstransferase (No1)'	512.739	0.000693842	-5.86864	-0.999999
'UPP3SNo1'	'Uroporphyrinogen-III synthase (No1)'	611.974	0.000695423	-5.94448	-0.999999
'UPPDC1No1'	'Uroporphyrinogen decarboxylase (uroporphyrinogen III) (No1)'	611.974	0.000695423	-5.94448	-0.999999
'TMDPPNo1'	'Thymidine phosphorylase (No1)'	611.974	0.000695423	-5.94448	-0.999999
'arm_HCO3E'	'HCO3 equilibration reaction (arm)'	611.974	0.000695423	-5.94448	-0.999999
'HCO3ENo1'	'HCO3 equilibration reaction (No1)'	499.105	1.45484e-05	-7.53538	-1
'HCO3ENo2'	'HCO3 equilibration reaction (No2)'	499.105	1.45484e-05	-7.53538	-1
'IMPCNo1'	'IMP cyclohydrolase (No1)'	499.105	1.45484e-05	-7.53538	-1
'IMPDNo1'	'IMP dehydrogenase (No1)'	611.974	0.000695423	-5.94448	-0.999999
'arm_ECOAH4'	'3-hydroxyacyl-CoA dehydratase (3-hydroxydecanoyl-CoA) (arm)'	611.974	0.000695423	-5.94448	-0.999999
'ECOAH4No1'	'3-hydroxyacyl-CoA dehydratase (3-hydroxydecanoyl-CoA) (No1)'	611.974	0.000695423	-5.94448	-0.999999
'ECOAH4No2'	'3-hydroxyacyl-CoA dehydratase (3-hydroxydecanoyl-CoA) (No2)'	512.739	0.000693842	-5.86864	-0.999999
'GLUTRSNo1'	'Glutamyl-tRNA synthetase (No1)'	1000	0.0104451	-4.98109	-0.99999
'TMPPPNo1'	'Thiamine-phosphate diphosphorylase (No1)'	1000	0.0104451	-4.98109	-0.99999
'URIK1No1'	'Uridine kinase ATPUridine (No1)'	1000	0.0104451	-4.98109	-0.99999
'URIK2No1'	'Uridine kinase (GTP:Uridine) (No1)'	1000	0.0104451	-4.98109	-0.99999
'CYTDK1No1'	'ATP:cytidine 5''-phosphotransferase (No1)'	1000	0.0104451	-4.98109	-0.99999
'CYTDK2No1'	'Cytidine kinase (GTP) (No1)'	1000	0.0104451	-4.98109	-0.99999
'XPPTNo1'	'Xanthine phosphoribosyltransferase (No1)'	2000	0.258588	-3.88842	-0.999871
'arm_HXPRT'	'Hypoxanthine phosphoribosyltransferase (Hypoxanthine) (arm)'	1000	0.0152988	-4.81534	-0.999985
'CSNo1'	'Citrate synthase (No1)'	1000	0.00429365	-5.36717	-0.999996
'ICDHyrNo1'	'Isocitrate dehydrogenase (NADP) (No1)'	1000	2.33806	-2.63114	-0.997662
'ACALDNo1'	'Acetaldehyde dehydrogenase (acetylating) (No1)'	510.14	0.000200153	-6.40633	-1
'ACALDNo2'	'Acetaldehyde dehydrogenase (acetylating) (No2)'	0.0001281	4.1751e-06	-1.48688	-0.967407
'PPANo2'	'Inorganic diphosphatase (No2)'	580.444	0.000192491	-6.47935	-1
'arm_ALAR'	'Alanine racemase (arm)'	1000	0.0219836	-4.6579	-0.999978
'ALARNo2'	'Alanine racemase (No2)'	5.9793e-07	2.9075e-07	-0.313131	-0.513739
'ALATA_LNo1'	'L-alanine transaminase (No1)'	1000	0.00145006	-5.83861	-0.999999
'XYLKNo1'	'Xylulokinase (No1)'	12.7714	5.53292e-06	-6.36328	-1
'XYLKNo2'	'Xylulokinase (No2)'	1000	0.0152988	-4.81534	-0.999985
'RBKNo1'	'Ribokinase (No1)'	510.14	0.0147817	-4.53797	-0.999971
'ASPTANo1'	'Aspartate transaminase (No1)'	1236.21	0.310086	-3.60061	-0.999749
'FBPNo1'	'Fructose-bisphosphatase (No1)'	137.222	8.93734e-05	-6.18622	-0.999999
'FBPNo3'	'Fructose-bisphosphatase (No3)'	0	0	0	0
'arm_PYK'	'Pyruvate kinase (arm)'	1000	9.26662e-06	-8.03308	-1
'arm_A5PISO'	'Arabinose-5-phosphate isomerase (arm)'	248.762	0.00018479	-6.12911	-0.999999
'A5PISONo1'	'Arabinose-5-phosphate isomerase (No1)'	51.0855	2.2132e-05	-6.36328	-1
'IPPMIbNo1'	'2-isopropylmalate hydratase (No1)'	137.222	0.00011799	-6.06558	-0.999999
'arm_ACHBS'	'2-aceto-2-hydroxybutanoate synthase (arm)'	91.4814	6.45366e-05	-6.15153	-0.999999
'ACHBSNo1'	'2-aceto-2-hydroxybutanoate synthase (No1)'	137.222	8.99555e-05	-6.1834	-0.999999
'ACHBSNo2'	'2-aceto-2-hydroxybutanoate synthase (No2)'	91.4814	6.45366e-05	-6.15153	-0.999999
'arm_ACLS'	'Acetolactate synthase (arm)'	137.222	0.000117949	-6.06573	-0.999999
'ACLSNo1'	'Acetolactate synthase (No1)'	1000	0.152555	-3.81657	-0.999847
'CHORMNo2'	'Chorismate mutase (No2)'	578.774	0.113973	-3.70571	-0.999803
'CHORSNo1'	'Chorismate synthase (No1)'	2.23503e-06	1.09176e-06	-0.311155	-0.511522
'ECOAH6No2'	'3-hydroxyacyl-CoA dehydratase (3-hydroxytetradecanoyl-CoA) (No2)'	0.0001281	2.08114e-06	-1.78925	-0.983754
'arm_FBA'	'Fructose-bisphosphate aldolase (arm)'	1000	0.00044588	-6.35078	-1
'FBANo1'	'Fructose-bisphosphate aldolase (No1)'	47.7627	0.000135531	-5.54705	-0.999997
'FBANo2'	'Fructose-bisphosphate aldolase (No2)'	0.0001281	0.000128085	-5.04523e-05	-0.000116164
'MGSANo1'	'Methylglyoxal synthase (No1)'	0.0001281	0.000128086	-4.4751e-05	-0.000103038
'PPSNo1'	'Phosphoenolpyruvate synthase (No1)'	359.314	1.41481e-05	-7.40478	-1
'PGINo1'	'Glucose-6-phosphate isomerase (No1)'	368.052	1.41481e-05	-7.41521	-1
'EDANo1'	'2-dehydro-3-deoxy-phosphogluconate aldolase (No1)'	1000	2.20388	-2.65681	-0.997796
'PGLNo1'	'6-phosphogluconolactonase (No1)'	333.233	1.45114e-05	-7.36104	-1
'RPENo1'	'Ribulose 5-phosphate 3-epimerase (No1)'	511.998	1.00762e-05	-7.70597	-1
'arm_TALA'	'Transaldolase (arm)'	510.505	1.00761e-05	-7.70471	-1
'arm_TKT1'	'Transketolase (arm)'	998.209	0.00545825	-5.26217	-0.999995
'TKT1No1'	'Transketolase (No1)'	998.209	0.00545825	-5.26217	-0.999995
'TKT1No2'	'Transketolase (No2)'	998.209	0.00545825	-5.26217	-0.999995
'G6PDANo1'	'Glucosamine-6-phosphate deaminase (No1)'	998.209	0.00545825	-5.26217	-0.999995
'arm_ALCD2x'	'Alcohol dehydrogenase (ethanol) (arm)'	998.209	0.00545825	-5.26217	-0.999995
'ALCD2xNo1'	'Alcohol dehydrogenase (ethanol) (No1)'	611.974	0.000695423	-5.94448	-0.999999
'ALDD2yNo1'	'Aldehyde dehydrogenase (acetaldehyde, NADP) (No1)'	234.848	0.000719598	-5.5137	-0.999997
'ALDD2yNo4'	'Aldehyde dehydrogenase (acetaldehyde, NADP) (No4)'	1000	0.00243557	-5.6134	-0.999998
'ALDD2yNo5'	'Aldehyde dehydrogenase (acetaldehyde, NADP) (No5)'	507.155	0.00010275	-6.69336	-1
'RMINo1'	'L-rhamnose isomerase (No1)'	518.404	5.80252e-05	-6.95105	-1
'FMNATNo1'	'FMN adenylyltransferase (No1)'	199.94	1.44701e-05	-7.14043	-1
'arm_NADDP'	'NAD diphosphatase (arm)'	518.404	5.80252e-05	-6.95105	-1
'NADDPNo1'	'NAD diphosphatase (No1)'	510.826	1.14479e-05	-7.64955	-1
'NADDPNo2'	'NAD diphosphatase (No2)'	628.193	0.0259803	-4.38345	-0.999959
'arm_NMNAT'	'Nicotinamide-nucleotide adenylyltransferase (arm)'	509.708	1.14478e-05	-7.6486	-1
'NMNATNo1'	'Nicotinamide-nucleotide adenylyltransferase (No1)'	373.51	1.41481e-05	-7.4216	-1
'NMNATNo2'	'Nicotinamide-nucleotide adenylyltransferase (No2)'	611.974	0.00138926	-5.64395	-0.999998
'arm_HMPK1'	'Hydroxymethylpyrimidine kinase (ATP) (arm)'	1000	0.0187783	-4.72634	-0.999981
'HMPK1No1'	'Hydroxymethylpyrimidine kinase (ATP) (No1)'	264.791	1.38092e-05	-7.28274	-1
'HMPK1No2'	'Hydroxymethylpyrimidine kinase (ATP) (No2)'	266.967	1.38092e-05	-7.28629	-1
'arm_NDPK6'	'Nucleoside-diphosphate kinase (ATP:dUDP) (arm)'	269.652	1.38092e-05	-7.29064	-1
'NDPK6No1'	'Nucleoside-diphosphate kinase (ATP:dUDP) (No1)'	266.845	1.38092e-05	-7.28609	-1
'NDPK6No2'	'Nucleoside-diphosphate kinase (ATP:dUDP) (No2)'	266.967	1.38092e-05	-7.28629	-1
'arm_NDPK8'	'Nucleoside-diphosphate kinase (ATP:dADP) (arm)'	264.791	1.38092e-05	-7.28274	-1
'NDPK8No1'	'Nucleoside-diphosphate kinase (ATP:dADP) (No1)'	12.7714	5.53292e-06	-6.36328	-1
'NDPK8No2'	'Nucleoside-diphosphate kinase (ATP:dADP) (No2)'	276.866	7.25681e-06	-7.58152	-1
'PYNP2rNo1'	'Pyrimidine-nucleoside phosphorylase (uracil) (No1)'	279.19	7.25681e-06	-7.58515	-1
'arm_DURIPP'	'Deoxyuridine phosphorylase (arm)'	270.223	7.25681e-06	-7.57098	-1
'PTRCTANo1'	'Putrescine Transaminase (No1)'	5.9793e-07	2.90775e-07	-0.313093	-0.513697
'arm_CYSDS'	'Cysteine Desulfhydrase (arm)'	1000	2000	0.30103	1
'CYSDSNo1'	'Cysteine Desulfhydrase (No1)'	250	250	0	0
'CYSDSNo2'	'Cysteine Desulfhydrase (No2)'	1000	0.113917	-3.94341	-0.999886
'TRPAS2No1'	'Tryptophanase (L-tryptophan) (No1)'	218.89	7.17689e-06	-7.48429	-1
'arm_NDP3'	'Nucleoside diphosphatase GDP (arm)'	1000	0.00231	-5.63639	-0.999998
'NDP3No1'	'Nucleoside diphosphatase GDP (No1)'	1000	0.00243557	-5.6134	-0.999998
'NDP3No2'	'Nucleoside diphosphatase GDP (No2)'	215.461	7.17689e-06	-7.47743	-1
'arm_PMDPHT'	'Pyrimidine phosphatase (arm)'	213.59	7.17689e-06	-7.47365	-1
'PMDPHTNo1'	'Pyrimidine phosphatase (No1)'	214.166	7.17689e-06	-7.47481	-1
'PMDPHTNo2'	'Pyrimidine phosphatase (No2)'	216.661	7.24027e-06	-7.47603	-1
'ILETANo1'	'Isoleucine transaminase (No1)'	217.1	7.24027e-06	-7.4769	-1
'VALTANo1'	'Valine transaminase (No1)'	223.096	7.24027e-06	-7.48874	-1
'ORPTNo1'	'Orotate phosphoribosyltransferase (No1)'	217.915	7.17689e-06	-7.48235	-1
'RBFSaNo1'	'Riboflavin synthase (No1)'	215.461	7.17689e-06	-7.47743	-1
'DHAD2No1'	'Dihydroxy-acid dehydratase (2,3-dihydroxy-3-methylpentanoate) (No1)'	274.951	7.25681e-06	-7.57851	-1
'arm_G1PP'	'Glucose-1-phosphatase (arm)'	271.775	7.25681e-06	-7.57346	-1
'G1PPNo3'	'Glucose-1-phosphatase (No3)'	1000	0.00243557	-5.6134	-0.999998
'arm_PFL'	'Pyruvate formate lyase (arm)'	219.96	7.24027e-06	-7.48259	-1
'PFLNo1'	'Pyruvate formate lyase (No1)'	214.61	7.24027e-06	-7.4719	-1
'PFLNo2'	'Pyruvate formate lyase (No2)'	214.949	7.24027e-06	-7.47258	-1
'PFLNo4'	'Pyruvate formate lyase (No4)'	999.382	0.000869467	-6.06048	-0.999999
'FRD2No1'	'Fumarate reductase (No1)'	998.209	0.0100935	-4.99518	-0.99999
'arm_PTAr'	'Phosphotransacetylase (arm)'	218.89	7.17689e-06	-7.48429	-1
'PTArNo1'	'Phosphotransacetylase (No1)'	214.166	7.17689e-06	-7.47481	-1
'PTArNo2'	'Phosphotransacetylase (No2)'	219.367	7.24027e-06	-7.48142	-1
'arm_ACKr'	'Acetate kinase (arm)'	514.229	5.80252e-05	-6.94754	-1
'ACKrNo1'	'Acetate kinase (No1)'	216.661	7.24027e-06	-7.47603	-1
'ACKrNo2'	'Acetate kinase (No2)'	214.949	7.24027e-06	-7.47258	-1
'ACKrNo3'	'Acetate kinase (No3)'	998.347	0.00195026	-5.70919	-0.999998
'MOATNo1'	'3-deoxy-D-manno-octulosonic acid transferase (No1)'	199.94	1.44699e-05	-7.14043	-1
'UDCPDPSNo1'	'Undecaprenyl diphosphate synthase (No1)'	516.67	5.80216e-05	-6.94962	-1
'USHDNo1'	'UDP-sugar hydrolase (No1)'	511.998	1.00762e-05	-7.70597	-1
'LPADSSNo1'	'Lipid A disaccaride synthase (No1)'	333.233	1.45114e-05	-7.36104	-1
'TDSKNo1'	'Tetraacyldisaccharide 4''kinase (No1)'	333.233	1.45112e-05	-7.36104	-1
'arm_NTPP1'	'Nucleoside triphosphate pyrophosphorylase (dgtp) (arm)'	753.199	0.000302728	-6.39586	-1
'arm_NTPP2'	'Nucleoside triphosphate pyrophosphorylase (gtp) (arm)'	91.4814	6.45366e-05	-6.15153	-0.999999
'NTPP2No1'	'Nucleoside triphosphate pyrophosphorylase (gtp) (No1)'	137.222	0.00011699	-6.06927	-0.999999
'NTPP2No2'	'Nucleoside triphosphate pyrophosphorylase (gtp) (No2)'	515.003	2.90126e-05	-7.24922	-1
'NTPTP1No1'	'Nucleoside triphosphate tripolyhydrolase (No1)'	199.94	1.44699e-05	-7.14043	-1
'NTPTP2No1'	'Nucleoside triphosphate tripolyhydrolase (No1)'	511.998	1.00762e-05	-7.70597	-1
'arm_IPMD'	'3-isopropylmalate dehydrogenase (arm)'	512.457	5.80216e-05	-6.94607	-1
'ADSL2rNo1'	'Adenylosuccinate lyase (No1)'	362.289	1.41481e-05	-7.40836	-1
'arm_PUNP5'	'Purine-nucleoside phosphorylase (Inosine) (arm)'	998.209	0.00545825	-5.26217	-0.999995
'PUNP5No1'	'Purine-nucleoside phosphorylase (Inosine) (No1)'	137.222	8.99555e-05	-6.1834	-0.999999
'PUNP5No2'	'Purine-nucleoside phosphorylase (Inosine) (No2)'	511.375	5.80216e-05	-6.94515	-1
'arm_PUNP6'	'Purine-nucleoside phosphorylase (Deoxyinosine) (arm)'	405.187	2.90117e-05	-7.14508	-1
'PUNP6No1'	'Purine-nucleoside phosphorylase (Deoxyinosine) (No1)'	333.233	1.45114e-05	-7.36104	-1
'PUNP6No2'	'Purine-nucleoside phosphorylase (Deoxyinosine) (No2)'	514.229	5.80252e-05	-6.94754	-1
'PUNP7No1'	'Purine-nucleoside phosphorylase (Xanthosine) (No1)'	333.233	1.45114e-05	-7.36104	-1
'arm_RNDR1'	'Ribonucleoside-diphosphate reductase (ADP) (arm)'	333.233	1.45114e-05	-7.36104	-1
'RNDR1No1'	'Ribonucleoside-diphosphate reductase (ADP) (No1)'	269.543	1.38092e-05	-7.29046	-1
'RNDR1No2'	'Ribonucleoside-diphosphate reductase (ADP) (No2)'	1000	0.000578445	-6.23774	-0.999999
'arm_RNDR3'	'Ribonucleoside-diphosphate reductase (CDP) (arm)'	998.209	0.00545825	-5.26217	-0.999995
'RNDR3No1'	'Ribonucleoside-diphosphate reductase (CDP) (No1)'	611.974	0.000695423	-5.94448	-0.999999
'RNDR3No2'	'Ribonucleoside-diphosphate reductase (CDP) (No2)'	279.19	7.25681e-06	-7.58515	-1
'arm_RNDR4'	'Ribonucleoside-diphosphate reductase (UDP) (arm)'	270.223	7.25681e-06	-7.57098	-1
'RNDR4No1'	'Ribonucleoside-diphosphate reductase (UDP) (No1)'	217.915	7.17689e-06	-7.48235	-1
'RNDR4No2'	'Ribonucleoside-diphosphate reductase (UDP) (No2)'	216.204	7.17689e-06	-7.47893	-1
'TMDSNo1'	'Thymidylate synthase (No1)'	219.367	7.24027e-06	-7.48142	-1
'TMDK1No1'	'Thymidine kinase (ATP:thymidine) (No1)'	999.382	0.000869467	-6.06048	-0.999999
'PPCDCNo1'	'Phosphopantothenoylcysteine decarboxylase (No1)'	137.222	0.00011799	-6.06558	-0.999999
'FTHFDNo1'	'Formyltetrahydrofolate deformylase (No1)'	1000	0.0104451	-4.98109	-0.99999
'EDDNo1'	'6-phosphogluconate dehydratase (No1)'	1000	0.0104451	-4.98109	-0.99999
'DHQTiNo1'	'3-dehydroquinate dehydratase, irreversible (No1)'	1000	0.0104451	-4.98109	-0.99999
'PUNP1No1'	'Purine-nucleoside phosphorylase (Adenosine) (No1)'	512.739	0.000693842	-5.86864	-0.999999
'PUNP2No1'	'Purine-nucleoside phosphorylase (Deoxyadenosine) (No1)'	512.739	0.000693842	-5.86864	-0.999999
'arm_PUNP3'	'Purine-nucleoside phosphorylase (Guanosine) (arm)'	611.974	0.000695423	-5.94448	-0.999999
'PUNP3No1'	'Purine-nucleoside phosphorylase (Guanosine) (No1)'	611.974	0.000695423	-5.94448	-0.999999
'LYSAMNo1'	'Lysine 2,3-aminomutase (No1)'	611.974	0.000695423	-5.94448	-0.999999
'DHAD1No1'	'Dihydroxy-acid dehydratase (2,3-dihydroxy-3-methylbutanoate) (No1)'	611.974	0.00138926	-5.64395	-0.999998
'IPPMIaNo1'	'3-isopropylmalate dehydratase (No1)'	611.974	0.00138926	-5.64395	-0.999998
'G3PD7No1'	'Glycerol-3-phosphate dehydrogenase (demethylmenaquinone-8) (No1)'	137.222	0.00011799	-6.06558	-0.999999
'arm_NADH9'	'NADH dehydrogenase (demethylmenaquinone-8 & 0 protons) (arm)'	137.222	0.00011799	-6.06558	-0.999999
'NADH9No2'	'NADH dehydrogenase (demethylmenaquinone-8 & 0 protons) (No2)'	367.005	1.41481e-05	-7.41397	-1
'NADH9No3'	'NADH dehydrogenase (demethylmenaquinone-8 & 0 protons) (No3)'	611.974	0.000695423	-5.94448	-0.999999
'NADH9No4'	'NADH dehydrogenase (demethylmenaquinone-8 & 0 protons) (No4)'	137.222	0.00011799	-6.06558	-0.999999
'arm_NADH10'	'NADH dehydrogenase (menaquinone-8 & 0 protons) (arm)'	515.003	3.72703e-05	-7.14045	-1
'NADH10No1'	'NADH dehydrogenase (menaquinone-8 & 0 protons) (No1)'	515.003	3.72703e-05	-7.14045	-1
'NADH10No2'	'NADH dehydrogenase (menaquinone-8 & 0 protons) (No2)'	512.644	5.80252e-05	-6.9462	-1
'NADH10No3'	'NADH dehydrogenase (menaquinone-8 & 0 protons) (No3)'	611.974	0.000695423	-5.94448	-0.999999
'NADH10No4'	'NADH dehydrogenase (menaquinone-8 & 0 protons) (No4)'	511.998	1.00762e-05	-7.70597	-1
'MDHNo1'	'Malate dehydrogenase (No1)'	611.974	0.00138926	-5.64395	-0.999998
'arm_FUM'	'Fumarase (arm)'	611.974	0.00138926	-5.64395	-0.999998
'FUMNo1'	'Fumarase (No1)'	611.974	0.00138926	-5.64395	-0.999998
'FUMNo2'	'Fumarase (No2)'	611.974	0.00138926	-5.64395	-0.999998
'FUMNo3'	'Fumarase (No3)'	998.209	0.00545825	-5.26217	-0.999995
'PYAM5PONo1'	'Pyridoxamine 5''-phosphate oxidase (No1)'	499.105	1.45484e-05	-7.53538	-1
'OHPBATNo1'	'O-Phospho-4-hydroxy-L-threonine:2-oxoglutarate aminotransferase (No1)'	499.105	1.45484e-05	-7.53538	-1
'GLUTRRNo1'	'Glutamyl-tRNA reductase (No1)'	499.105	1.45484e-05	-7.53538	-1
'GLCS1No1'	'Glycogen synthase (ADPGlc) (No1)'	269.652	1.38092e-05	-7.29064	-1
'arm_GLCP'	'Glycogen phosphorylase (arm)'	611.974	0.000695423	-5.94448	-0.999999
'GLCPNo1'	'Glycogen phosphorylase (No1)'	611.974	0.000695423	-5.94448	-0.999999
'GLCPNo2'	'Glycogen phosphorylase (No2)'	611.974	0.000695423	-5.94448	-0.999999
'HEMEOSNo1'	'Heme O synthase (No1)'	611.974	0.000695423	-5.94448	-0.999999
'ADMDCNo1'	'Adenosylmethionine decarboxylase (No1)'	512.739	0.000693842	-5.86864	-0.999999
'AGMTNo1'	'Agmatinase (No1)'	512.739	0.000693842	-5.86864	-0.999999
'ARGDCNo1'	'Arginine decarboxylase (No1)'	512.739	0.000693842	-5.86864	-0.999999
'ARGSSNo1'	'Argininosuccinate synthase (No1)'	1000	0.0104451	-4.98109	-0.99999
'AGPRNo1'	'N-acetyl-g-glutamyl-phosphate reductase (No1)'	1000	0.0104451	-4.98109	-0.99999
'SPMSNo1'	'Spermidine synthase (No1)'	1000	0.0104451	-4.98109	-0.99999
'G1SATNo1'	'Glutamate-1-semialdehyde aminotransferase (No1)'	137.222	0.00011699	-6.06927	-0.999999
'KDOCT2No1'	'3-deoxy-manno-octulosonate cytidylyltransferase (No1)'	611.974	0.000695423	-5.94448	-0.999999
'OAADCNo1'	'Oxaloacetate decarboxylase (No1)'	611.974	0.000695423	-5.94448	-0.999999
'MNNHNo1'	'D-mannonate hydrolyase (No1)'	611.974	0.000695423	-5.94448	-0.999999
'ALTRHNo1'	'Altronate hydrolase (No1)'	499.105	1.45484e-05	-7.53538	-1
'MACPDNo1'	'Malonyl-ACP decarboxylase (No1)'	27.9886	8.55264e-06	-6.51488	-1
'DMQMTNo1'	'3-Dimethylubiquinonol 3-methyltransferase (No1)'	266.845	1.38092e-05	-7.28609	-1
'ICHORS_copy1No1'	' (No1)'	264.918	1.38092e-05	-7.28294	-1
'arm_HACD5'	'3-hydroxyacyl-CoA dehydrogenase (3-oxododecanoyl-CoA) (arm)'	1000	0.0187783	-4.72634	-0.999981
'HACD5No1'	'3-hydroxyacyl-CoA dehydrogenase (3-oxododecanoyl-CoA) (No1)'	1000	0.0187783	-4.72634	-0.999981
'HACD5No2'	'3-hydroxyacyl-CoA dehydrogenase (3-oxododecanoyl-CoA) (No2)'	1000	0.0187783	-4.72634	-0.999981
'HPPK2No1'	'6-hydroxymethyl-dihydropterin pyrophosphokinase (No1)'	1000	0.0187783	-4.72634	-0.999981
'PTPATiNo1'	'Pantetheine-phosphate adenylyltransferase (No1)'	359.314	1.41481e-05	-7.40478	-1
'HEX7No1'	'Hexokinase (D-fructose:ATP) (No1)'	137.222	8.93734e-05	-6.18622	-0.999999
'DXPRIiNo1'	'1-deoxy-D-xylulose reductoisomerase (No1)'	91.4814	6.45366e-05	-6.15153	-0.999999
'OPHBDCNo1'	'Octaprenyl-hydroxybenzoate decarboxylase (No1)'	137.222	0.000116904	-6.0696	-0.999999
'OHPHMNo1'	'2-octaprenyl-6-hydroxyphenol methylase (No1)'	208.754	0.000109372	-6.28073	-0.999999
'GHMT2rNo1'	'Glycine hydroxymethyltransferase, reversible (No1)'	199.94	1.44701e-05	-7.14043	-1
'DHORD2No1'	'Dihydoorotic acid dehydrogenase (quinone8) (No1)'	499.105	1.45484e-05	-7.53538	-1
'ADK4No1'	'Adentylate kinase (ITP) (No1)'	199.94	1.44701e-05	-7.14043	-1
'INSKNo1'	'Insosine kinase (No1)'	512.644	5.80252e-05	-6.9462	-1
'arm_ABTA'	'4-aminobutyrate transaminase (arm)'	199.94	1.44701e-05	-7.14043	-1
'ABTANo1'	'4-aminobutyrate transaminase (No1)'	199.94	1.44701e-05	-7.14043	-1
'ABTANo2'	'4-aminobutyrate transaminase (No2)'	137.222	0.000117949	-6.06573	-0.999999
'SSALxNo1'	'Succinate-semialdehyde dehydrogenase (NAD) (No1)'	137.222	0.00011699	-6.06927	-0.999999
'ASPTNo1'	'L-aspartase (No1)'	499.105	1.45484e-05	-7.53538	-1
'arm_SERD_L'	'L-serine deaminase (arm)'	367.005	1.41481e-05	-7.41397	-1
'SERD_LNo1'	'L-serine deaminase (No1)'	362.289	1.41481e-05	-7.40836	-1
'SERD_LNo2'	'L-serine deaminase (No2)'	358.718	1.41481e-05	-7.40405	-1
'SERD_LNo3'	'L-serine deaminase (No3)'	368.052	1.41481e-05	-7.41521	-1
'SERD_LNo5'	'L-serine deaminase (No5)'	499.105	1.45484e-05	-7.53538	-1
'arm_THRD'	'L-threonine dehydrogenase (arm)'	499.105	1.45484e-05	-7.53538	-1
'THRDNo1'	'L-threonine dehydrogenase (No1)'	266.845	1.38092e-05	-7.28609	-1
'THRDNo2'	'L-threonine dehydrogenase (No2)'	270.988	1.40521e-05	-7.28521	-1
'KARA1No1'	'Ketol-acid reductoisomerase (2,3-dihydroxy-3-methylbutanoate) (No1)'	268.076	1.40521e-05	-7.28052	-1
'KARA2No1'	'Ketol-acid reductoisomerase (2-Acetolactate) (No1)'	499.105	1.45484e-05	-7.53538	-1
'ACCOACNo1'	'Acetyl-CoA carboxylase (No1)'	499.105	1.45484e-05	-7.53538	-1
'NADKNo1'	'NAD kinase (No1)'	499.105	1.45484e-05	-7.53538	-1
'ICHORS_copy2No1'	' (No1)'	499.105	1.45484e-05	-7.53538	-1
'SUCBZSNo1'	'O-succinylbenzoate-CoA synthase (No1)'	499.105	1.45484e-05	-7.53538	-1
'DHBDNo1'	'2,3-dihydro-2,3-dihydroxybenzoate dehydrogenase (No1)'	363.064	1.41481e-05	-7.40928	-1
'ICHORTNo1'	'Isochorismatase (No1)'	359.314	1.41481e-05	-7.40478	-1
'RBK_L1No1'	'L-ribulokinase (L-ribulose) (No1)'	499.105	1.45484e-05	-7.53538	-1
'arm_RBP4E'	'L-ribulose-phosphate 4-epimerase (arm)'	274.983	1.40521e-05	-7.29157	-1
'RBP4ENo1'	'L-ribulose-phosphate 4-epimerase (No1)'	1000	0.0104451	-4.98109	-0.99999
'RBP4ENo2'	'L-ribulose-phosphate 4-epimerase (No2)'	1000	0.0104451	-4.98109	-0.99999
'RBP4ENo3'	'L-ribulose-phosphate 4-epimerase (No3)'	1000	0.0104451	-4.98109	-0.99999
'arm_NTD2'	'5''-nucleotidase (UMP) (arm)'	512.739	0.000693842	-5.86864	-0.999999
'NTD2No1'	'5''-nucleotidase (UMP) (No1)'	499.105	1.45484e-05	-7.53538	-1
'NTD2No2'	'5''-nucleotidase (UMP) (No2)'	499.105	1.45484e-05	-7.53538	-1
'NTD5No4'	'5''-nucleotidase (dTMP) (No4)'	753.199	0.000302728	-6.39586	-1
'arm_NTD6'	'5''-nucleotidase (dAMP) (arm)'	282.027	7.25681e-06	-7.58955	-1
'NTD6No1'	'5''-nucleotidase (dAMP) (No1)'	273.083	7.25681e-06	-7.57555	-1
'NTD6No2'	'5''-nucleotidase (dAMP) (No2)'	611.974	0.000695423	-5.94448	-0.999999
'NTD6No3'	'5''-nucleotidase (dAMP) (No3)'	273.238	1.38092e-05	-7.29637	-1
'LGTHLNo1'	'Lactoylglutathione lyase (No1)'	410.007	2.90126e-05	-7.1502	-1
'arm_PYDXPP'	'Pyridoxal 5-phosphate phosphatase (arm)'	518.404	5.80252e-05	-6.95105	-1
'PYDXPPNo1'	'Pyridoxal 5-phosphate phosphatase (No1)'	512.644	5.80252e-05	-6.9462	-1
'PYDXPPNo2'	'Pyridoxal 5-phosphate phosphatase (No2)'	513.537	2.90117e-05	-7.248	-1
'PYDXPPNo3'	'Pyridoxal 5-phosphate phosphatase (No3)'	333.233	1.45114e-05	-7.36104	-1
'PYDXPPNo4'	'Pyridoxal 5-phosphate phosphatase (No4)'	199.94	1.44701e-05	-7.14043	-1
'PDXPPNo1'	'Pyridoxine 5-phosphate phosphatase (No1)'	410.011	2.90126e-05	-7.15021	-1
'arm_HACD6'	'3-hydroxyacyl-CoA dehydrogenase (3-oxotetradecanoyl-CoA) (arm)'	518.404	5.80252e-05	-6.95105	-1
'HACD6No1'	'3-hydroxyacyl-CoA dehydrogenase (3-oxotetradecanoyl-CoA) (No1)'	199.94	1.44701e-05	-7.14043	-1
'HACD6No2'	'3-hydroxyacyl-CoA dehydrogenase (3-oxotetradecanoyl-CoA) (No2)'	410.011	2.90126e-05	-7.15021	-1
'arm_ECOAH1'	'3-hydroxyacyl-CoA dehydratase (3-hydroxybutanoyl-CoA) (arm)'	199.94	1.44701e-05	-7.14043	-1
'ECOAH1No1'	'3-hydroxyacyl-CoA dehydratase (3-hydroxybutanoyl-CoA) (No1)'	410.011	2.90126e-05	-7.15021	-1
'ECOAH1No2'	'3-hydroxyacyl-CoA dehydratase (3-hydroxybutanoyl-CoA) (No2)'	515.003	2.90126e-05	-7.24922	-1
'arm_ECOAH2'	'3-hydroxyacyl-CoA dehydratase (3-hydroxyhexanoyl-CoA) (arm)'	512.644	5.80252e-05	-6.9462	-1
'ECOAH2No1'	'3-hydroxyacyl-CoA dehydratase (3-hydroxyhexanoyl-CoA) (No1)'	358.718	1.41481e-05	-7.40405	-1
'ECOAH2No2'	'3-hydroxyacyl-CoA dehydratase (3-hydroxyhexanoyl-CoA) (No2)'	368.052	1.41481e-05	-7.41521	-1
'arm_ECOAH3'	'3-hydroxyacyl-CoA dehydratase (3-hydroxyoctanoyl-CoA) (arm)'	363.064	1.41481e-05	-7.40928	-1
'ECOAH3No1'	'3-hydroxyacyl-CoA dehydratase (3-hydroxyoctanoyl-CoA) (No1)'	998.209	0.00545825	-5.26217	-0.999995
'ECOAH3No2'	'3-hydroxyacyl-CoA dehydratase (3-hydroxyoctanoyl-CoA) (No2)'	199.94	1.44701e-05	-7.14043	-1
'UGLTNo1'	'UDPglucose--hexose-1-phosphate uridylyltransferase (No1)'	199.94	1.44699e-05	-7.14043	-1
'DXPSNo1'	'1-deoxy-D-xylulose 5-phosphate synthase (No1)'	137.222	0.000117949	-6.06573	-0.999999
'CDPMEKNo1'	'4-(cytidine 5''-diphospho)-2-C-methyl-D-erythritol kinase (No1)'	137.222	0.000116951	-6.06942	-0.999999
'MECDPSNo1'	'2-C-methyl-D-erythritol 2,4-cyclodiphosphate synthase (No1)'	137.222	0.000117946	-6.06574	-0.999999
'DDGLKNo1'	'2-dehydro-3-deoxygluconokinase (No1)'	91.4814	6.45366e-05	-6.15153	-0.999999
'XYLI2No1'	'Xylose isomerase (No1)'	199.94	1.44701e-05	-7.14043	-1
'PMANMNo1'	'Phosphomannomutase (No1)'	199.94	1.44701e-05	-7.14043	-1
'ICLNo1'	'Isocitrate lyase (No1)'	499.105	1.45484e-05	-7.53538	-1
'GLYCLNo1'	'Glycine Cleavage System (No1)'	1000	0.0104451	-4.98109	-0.99999
'HCYSMTNo1'	'Homocysteine S-methyltransferase (No1)'	1000	0.0104451	-4.98109	-0.99999
'LACZNo1'	'B-galactosidase (No1)'	510.826	1.14479e-05	-7.64955	-1
'TRE6PHNo1'	'Trehalose-6-phosphate hydrolase (No1)'	510.826	1.14479e-05	-7.64955	-1
'XYLI1No1'	'Xylose isomerase (No1)'	998.209	0.00545825	-5.26217	-0.999995
'PPCNo1'	'Phosphoenolpyruvate carboxylase (No1)'	273.238	1.38092e-05	-7.29637	-1
'arm_G3PT'	'Glycerol-3-phosphatase (arm)'	273.238	1.38092e-05	-7.29637	-1
'CINNDONo1'	'Cinnamate dioxygenase (No1)'	137.222	8.93734e-05	-6.18622	-0.999999
'DHPPDNo1'	'2,3-dihydroxyphenylpropionate dehydrogenase (No1)'	137.222	8.99555e-05	-6.1834	-0.999999
'DHCINDNo1'	'2,3-dihydroxycinnamate dehydrogenase (No1)'	264.918	1.38092e-05	-7.28294	-1
'CITLNo1'	'Citrate lyase (No1)'	1000	0.0187783	-4.72634	-0.999981
'GOFUCRNo1'	'GDP-4-oxo-L-fucose reductase (No1)'	1000	0.0187783	-4.72634	-0.999981
'arm_PYDXK'	'Pyridoxal kinase (arm)'	221.27	7.17689e-06	-7.48899	-1
'PYDXKNo1'	'Pyridoxal kinase (No1)'	219.96	7.24027e-06	-7.48259	-1
'PYDXKNo2'	'Pyridoxal kinase (No2)'	217.1	7.24027e-06	-7.4769	-1
'GTPCII2No1'	'GTP cyclohydrolase II (25drapp) (No1)'	282.027	7.25681e-06	-7.58955	-1
'SADT2No1'	'Sulfate adenyltransferase (No1)'	276.866	7.25681e-06	-7.58152	-1
'LCARSNo1'	'Lacaldehyde reductase (S-propane-1,2-diol forming) (No1)'	271.775	7.25681e-06	-7.57346	-1
'arm_ALCD19'	'Alcohol dehydrogenase (glycerol) (arm)'	221.27	7.17689e-06	-7.48899	-1
'ALCD19No1'	'Alcohol dehydrogenase (glycerol) (No1)'	510.826	1.14479e-05	-7.64955	-1
'RMPANo1'	'Rhamnulose-1-phosphate aldolase (No1)'	611.974	0.000695423	-5.94448	-0.999999
'PFK_2No1'	'Phosphofructokinase (No1)'	151.932	0.000137656	-6.04285	-0.999999
'GLTPDNo1'	'Galactitol-1-phosphate dehydrogenase (No1)'	1000	0.011706	-4.93159	-0.999988
'arm_TGBPA'	'Tagatose-bisphosphate aldolase (arm)'	0	0	0	0
'TGBPANo1'	'Tagatose-bisphosphate aldolase (No1)'	1000	0.0223005	-4.65168	-0.999978
'TGBPANo2'	'Tagatose-bisphosphate aldolase (No2)'	512.644	0.00012286	-6.62041	-1
'MANAONo1'	'Mannonate oxidoreductase (No1)'	510.826	1.14479e-05	-7.64955	-1
'TAGURrNo1'	'Tagaturonate reductase (No1)'	686.401	0.000166846	-6.61426	-1
'PGLYCPNo1'	'Phosphoglycolate phosphatase (No1)'	367.871	8.02243e-05	-6.66139	-1
'GLXCLNo1'	'Glyoxalate carboligase (No1)'	817.139	0.000888146	-5.96381	-0.999999
'TARTDNo1'	'L(+)-tartrate dehydratase (No1)'	577.942	0.000109211	-6.72362	-1
'GLCRALNo1'	'5-dehydro-4-deoxyglucarate aldolase (No1)'	543.07	0.0001315	-6.61593	-1
'arm_KAS14'	'Beta-ketoacyl-ACP synthase (arm)'	1000	2.82147	-2.54952	-0.997179
'KAS14No1'	'Beta-ketoacyl-ACP synthase (No1)'	1000	0.0265892	-4.57529	-0.999973
'EDTXS1No1'	'Endotoxin Synthesis (lauroyl transferase) (No1)'	1000	0.152555	-3.81657	-0.999847
'EDTXS3No1'	'Endotoxin Synthesis (palmitoleoyl ACP) (No1)'	1000	0.305111	-3.51554	-0.999695
'EDTXS4No1'	'Endotoxin Synthesis (myristoyl transferase) (No1)'	1000	0.152555	-3.81657	-0.999847
'arm_HACD7'	'3-hydroxyacyl-CoA dehydrogenase (3-oxohexadecanoyl-CoA) (arm)'	999.86	0.0203094	-4.69224	-0.99998
'HACD7No1'	'3-hydroxyacyl-CoA dehydrogenase (3-oxohexadecanoyl-CoA) (No1)'	0.0001281	0.000128081	-6.17315e-05	-0.000142132
'AACPS1No1'	'Acyl-[acyl-carrier-protein] synthetase (n-C14:0) (No1)'	998.209	0.000197858	-6.70287	-1
'SDPDSNo1'	'Succinyl-diaminopimelate desuccinylase (No1)'	998.209	0.000197858	-6.70287	-1
'arm_DMSOR1'	'Dimethyl sulfoxide reductase (Menaquinol 8) (arm)'	998.209	0.000197858	-6.70287	-1
'DMSOR1No1'	'Dimethyl sulfoxide reductase (Menaquinol 8) (No1)'	998.209	0.000197858	-6.70287	-1
'2DGULRyNo1'	'2-dehydro-L-gulonate reductase (NADPH) (No1)'	1000	0.152555	-3.81657	-0.999847
'RZ5PPNo1'	'Alpha-ribazole 5-phosphate phosphatase (No1)'	1000	0.305111	-3.51554	-0.999695
'NTD9No4'	'5''-nucleotidase (GMP) (No4)'	1000	0.305111	-3.51554	-0.999695
'ADPTNo1'	'Adenine phosphoribosyltransferase (No1)'	367.005	1.41481e-05	-7.41397	-1
'ADK1No1'	'Adenylate kinase (No1)'	362.289	1.41481e-05	-7.40836	-1
'OCTDPSNo1'	'Octaprenyl pyrophosphate synthase (No1)'	363.064	1.41481e-05	-7.40928	-1
'AACPS2No1'	'Acyl-[acyl-carrier-protein] synthetase (n-C14:1) (No1)'	358.718	1.41481e-05	-7.40405	-1
'AACPS3No1'	'Acyl-[acyl-carrier-protein] synthetase (n-C16:0) (No1)'	359.314	1.41481e-05	-7.40478	-1
'AMANKNo1'	'N-acetyl-D-mannosamine kinase (No1)'	274.444	0.000235979	-6.06558	-0.999999
'ACNMLNo1'	'N-Acetylneuraminate lyase (No1)'	274.444	0.000233807	-6.0696	-0.999999
'arm_CAT'	'Catalase (arm)'	1000	0.000473489	-6.32469	-1
'CATNo1'	'Catalase (No1)'	1000	0.305306	-3.51526	-0.999695
'CATNo2'	'Catalase (No2)'	1000	0.305296	-3.51528	-0.999695
'SERASrNo1'	'(L-seryl)adenylate synthase (No1)'	1000	0.305111	-3.51554	-0.999695
'ACMAMUTNo1'	'UDP-N-acetyl-D-mannosaminuronic acid transferase (No1)'	373.51	1.41481e-05	-7.4216	-1
'DDGALKNo1'	'2-dehydro-3-deoxygalactonokinase (No1)'	367.005	1.41481e-05	-7.41397	-1
'arm_AB6PGH'	'Arbutin 6-phosphate glucohydrolase (arm)'	368.052	1.41481e-05	-7.41521	-1
'AB6PGHNo1'	'Arbutin 6-phosphate glucohydrolase (No1)'	362.289	1.41481e-05	-7.40836	-1
'AB6PGHNo2'	'Arbutin 6-phosphate glucohydrolase (No2)'	363.064	1.41481e-05	-7.40928	-1
'AB6PGHNo3'	'Arbutin 6-phosphate glucohydrolase (No3)'	358.718	1.41481e-05	-7.40405	-1
'AMALT1No1'	'Amylomaltase (maltotriose) (No1)'	373.51	1.41481e-05	-7.4216	-1
'MLTP2No1'	'Maltodextrin phosphorylase (maltohexaose) (No1)'	999.997	0	-18	-1
'PACCOALNo1'	'Phenylacetate-CoA ligase (No1)'	985.197	0.257344	-3.58301	-0.999739
'arm_UDCPDP'	'Undecaprenyl-diphosphatase (arm)'	1000	2.82147	-2.54952	-0.997179
'UDCPDPNo1'	'Undecaprenyl-diphosphatase (No1)'	998.209	0.000197858	-6.70287	-1
'UDCPDPNo2'	'Undecaprenyl-diphosphatase (No2)'	998.209	0.000197858	-6.70287	-1
'UDCPDPNo3'	'Undecaprenyl-diphosphatase (No3)'	1000	0.152555	-3.81657	-0.999847
'TREHNo1'	'Alpha,alpha-trehalase (No1)'	998.209	0.000197858	-6.70287	-1
'HACD1No2'	'3-hydroxyacyl-CoA dehydrogenase (acetoacetyl-CoA) (No2)'	985.197	0.257344	-3.58301	-0.999739
'HACD2No2'	'3-hydroxyacyl-CoA dehydrogenase (3-oxohexanoyl-CoA) (No2)'	216.204	7.17689e-06	-7.47893	-1
'arm_ACACCT'	'Acetyl-CoA:acetoacetyl-CoA transferase (arm)'	213.59	7.17689e-06	-7.47365	-1
'ACACCTNo1'	'Acetyl-CoA:acetoacetyl-CoA transferase (No1)'	223.096	7.24027e-06	-7.48874	-1
'ACACCTNo2'	'Acetyl-CoA:acetoacetyl-CoA transferase (No2)'	214.61	7.24027e-06	-7.4719	-1
'BUTCTNo1'	'Acetyl-CoA:butyrate-CoA transferase (No1)'	274.951	7.25681e-06	-7.57851	-1
'2DGULRxNo1'	'2-dehydro-L-gulonate reductase (NADH) (No1)'	273.083	7.25681e-06	-7.57555	-1
'G1PTTNo2'	'Glucose-1-phosphate thymidylyltransferase (No2)'	1000	0.305111	-3.51554	-0.999695
'TDPGDHNo2'	'DTDPglucose 4,6-dehydratase (No2)'	548.896	0.00844761	-4.81276	-0.999985
'UDPGALMNo1'	'UDPgalactopyranose mutase (No1)'	1000	0.314335	-3.50261	-0.999686
'TDPDRRNo1'	'DTDP-4-dehydrorhamnose reductase (No1)'	1000	0.152555	-3.81657	-0.999847
'G3PD6No1'	'Glycerol-3-phosphate dehydrogenase (menaquinone-8) (No1)'	1000	0.305111	-3.51554	-0.999695
'NDPK7No1'	'Nucleoside-diphosphate kinase (ATP:dCDP) (No1)'	267.37	0.000630671	-5.62731	-0.999998
'GLYATNo1'	'Glycine C-acetyltransferase (No1)'	267.37	0.000630671	-5.62731	-0.999998
'ADNUCNo1'	'Adenosine hydrolase (No1)'	1000	0.0246519	-4.60815	-0.999975
'GMHEPPANo1'	'D-glycero-D-manno-heptose 1,7-bisphosphate phosphatase (No1)'	1000	0.305111	-3.51554	-0.999695
'S7PINo1'	'Sedoheptulose 7-phosphate isomerase (No1)'	1000	0.305111	-3.51554	-0.999695
'TRPS3No1'	'Tryptophan synthase (indoleglycerol phosphate) (No1)'	1000	0.157538	-3.80262	-0.999842
'CRNBTCTNo1'	'Gamma-butyrobetainyl-CoA: carnitine CoA transferase (No1)'	1000	0.305111	-3.51554	-0.999695
'CRNCBCTNo1'	'Crotonobetainyl-CoA: carnitine CoA transferase (No1)'	221.04	7.15989e-06	-7.48956	-1
'CRNCDHNo1'	'Carnityl-CoA dehydratse (No1)'	1000	0.00482363	-5.31663	-0.999995
'FADRxNo1'	'FAD reductase (No1)'	998.318	0.0946231	-4.02327	-0.999905
'arm_NDPK2'	'Nucleoside-diphosphate kinase (ATP:UDP) (arm)'	1000	0.0170312	-4.76876	-0.999983
'NDPK2No1'	'Nucleoside-diphosphate kinase (ATP:UDP) (No1)'	0.00149498	0.00149483	-4.34273e-05	-9.999e-05
'arm_NDPK3'	'Nucleoside-diphosphate kinase (ATP:CDP) (arm)'	2000	0.0825449	-4.38434	-0.999959
'NDPK3No1'	'Nucleoside-diphosphate kinase (ATP:CDP) (No1)'	511.998	1.14479e-05	-7.65054	-1
'NDPK3No2'	'Nucleoside-diphosphate kinase (ATP:CDP) (No2)'	511.998	1.00762e-05	-7.70597	-1
'arm_NDPK4'	'Nucleoside-diphosphate kinase (ATP:dTDP) (arm)'	832.38	6.63131e-05	-7.09872	-1
'NDPK4No1'	'Nucleoside-diphosphate kinase (ATP:dTDP) (No1)'	671.775	0.000434171	-6.18956	-0.999999
'FCLTNo2'	'Ferrochelatase (No2)'	1.14888e-06	1.14868e-06	-7.50617e-05	-0.000172821
'FCLTNo3'	'Ferrochelatase (No3)'	1.14888e-06	1.14868e-06	-7.50617e-05	-0.000172821
'HBZOPTNo1'	'Hydroxybenzoate octaprenyltransferase (No1)'	1.14888e-06	1.14868e-06	-7.50617e-05	-0.000172821
'PNTKNo1'	'Pantothenate kinase (No1)'	1.14888e-06	1.14868e-06	-7.50617e-05	-0.000172821
'HETZKNo1'	'Hydroxyethylthiazole kinase (No1)'	499.105	0.00186293	-5.42799	-0.999996
'KDOPSNo1'	'3-deoxy -D-manno-octulosonic -acid 8-phosphate synthase (No1)'	499.105	0.00186293	-5.42799	-0.999996
'KDOPPNo1'	'3-deoxy-manno-octulosonate-8-phosphatase (No1)'	499.105	0.00186293	-5.42799	-0.999996
'CYNTAHNo1'	'Cyanate aminohydrolase (No1)'	1000	0.305111	-3.51554	-0.999695
'GSPMDANo1'	'Glutathionylspermidine amidase (No1)'	1000	0.305111	-3.51554	-0.999695
'GSPMDSNo1'	'Glutathionylspermidine synthetase (No1)'	1000	0.305111	-3.51554	-0.999695
'GUADNo1'	'Guanine deaminase (No1)'	1000	0.305111	-3.51554	-0.999695
'arm_TMAOR1'	'Trimethylamine N-oxide reductase (menaquinol 8) (arm)'	1000	0.305111	-3.51554	-0.999695
'TMAOR1No1'	'Trimethylamine N-oxide reductase (menaquinol 8) (No1)'	1000	0.305111	-3.51554	-0.999695
'TMAOR1No2'	'Trimethylamine N-oxide reductase (menaquinol 8) (No2)'	1000	0.305111	-3.51554	-0.999695
'TMAOR2No1'	'Trimethylamine N-oxide reductase (demethylmenaquinol 8) (No1)'	1000	1.9308	-2.71426	-0.998069
'DTMPKNo1'	'DTMP kinase (No1)'	998.209	1.41481e-05	-7.84852	-1
'arm_NDPK1'	'Nucleoside-diphosphate kinase (ATP:GDP) (arm)'	998.252	0.00413418	-5.38285	-0.999996
'NDPK1No1'	'Nucleoside-diphosphate kinase (ATP:GDP) (No1)'	998.209	1.41481e-05	-7.84852	-1
'NDPK1No2'	'Nucleoside-diphosphate kinase (ATP:GDP) (No2)'	362.325	0.00413418	-4.94271	-0.999989
'arm_TRDR'	'Thioredoxin reductase (NADPH) (arm)'	363.107	0.00413418	-4.94364	-0.999989
'TRDRNo1'	'Thioredoxin reductase (NADPH) (No1)'	358.718	1.41481e-05	-7.40405	-1
'TRDRNo2'	'Thioredoxin reductase (NADPH) (No2)'	0.000756535	1.3198e-05	-1.75832	-0.982555
'arm_PGMT'	'Phosphoglucomutase (arm)'	0.000149354	3.29946e-06	-1.65577	-0.977908
'PGMTNo1'	'Phosphoglucomutase (No1)'	1.60843e-05	7.748e-06	-0.317212	-0.518287
'KG6PDCNo2'	'3-keto-L-gulonate 6-phosphate decarboxylase (No2)'	1000	0.305111	-3.51554	-0.999695
'arm_X5PL3E'	'L-xylulose 5-phosphate 3-epimerase (arm)'	1000	0.305111	-3.51554	-0.999695
'BETALDHxNo1'	'Betaine-aldehyde dehydrogenase (No1)'	1.60843e-05	6.59891e-06	-0.386929	-0.589729
'BETALDHyNo1'	'Betaine-aldehyde dehydrogenase (No1)'	0.000149354	3.29946e-06	-1.65577	-0.977908
'MLTG3No1'	'Maltodextrin glucosidase (maltopentaose) (No1)'	0.000149354	3.29946e-06	-1.65577	-0.977908
'arm_DKGLCNR1'	'2,5-diketo-D-gluconate reductase (arm)'	0.000149354	3.30819e-06	-1.65463	-0.97785
'DKGLCNR1No1'	'2,5-diketo-D-gluconate reductase (No1)'	0.000149354	3.30819e-06	-1.65463	-0.97785
'DKGLCNR1No2'	'2,5-diketo-D-gluconate reductase (No2)'	1.14888e-06	1.14868e-06	-7.50617e-05	-0.000172821
'NADTRHDNo1'	'NAD transhydrogenase (No1)'	139.252	4.85084e-05	-6.45799	-1
'FMNRx2No2'	'FMN reductase (No2)'	578.584	0.000816033	-5.85066	-0.999999
'FMNRx2No3'	'FMN reductase (No3)'	578.584	0.000816033	-5.85066	-0.999999
'GMPS2No1'	'GMP synthase (No1)'	578.584	0.000816033	-5.85066	-0.999999
'AMPNNo1'	'AMP nucleosidase (No1)'	578.584	0.000816033	-5.85066	-0.999999
'ADCSNo1'	'4-amino-4-deoxychorismate synthase (No1)'	998.209	1.41481e-05	-7.84852	-1
'UMPKNo1'	'UMP kinase (No1)'	578.584	0.000816033	-5.85066	-0.999999
'UMPKNo2'	'UMP kinase (No2)'	578.584	0.000816033	-5.85066	-0.999999
'DDPGALANo1'	'2-dehydro-3-deoxy-6-phosphogalactonate aldolase (No1)'	998.246	0.00413418	-5.38285	-0.999996
'DURIK1No1'	'Deoxyuridine kinase (ATP:Deoxyuridine) (No1)'	998.209	1.41481e-05	-7.84852	-1
'UPPRTNo1'	'Uracil phosphoribosyltransferase (No1)'	998.209	4.81898e-09	-11.3163	-1
'CTPS2No1'	'CTP synthase (glutamine) (No1)'	998.209	4.81898e-09	-11.3163	-1
'arm_NTD1'	'5''-nucleotidase (dUMP) (arm)'	998.209	4.81898e-09	-11.3163	-1
'NTD1No1'	'5''-nucleotidase (dUMP) (No1)'	998.209	4.8189e-09	-11.3163	-1
'NTD1No2'	'5''-nucleotidase (dUMP) (No2)'	1000	0.061447	-4.2115	-0.999939
'NTD7No1'	'5''-nucleotidase (AMP) (No1)'	500	0.00244681	-5.31037	-0.999995
'UAGPT3No1'	'UDP-N-acetylglucosamine-N-acetylmuramyl-(pentapeptide)pyrophosphoryl-undecaprenol N-acetylglucosamine transferase (No1)'	1.14888e-06	1.14866e-06	-8.13592e-05	-0.000187319
'arm_F6PA'	'Fructose 6-phosphate aldolase (arm)'	234.848	0.000686564	-5.53411	-0.999997
'F6PANo1'	'Fructose 6-phosphate aldolase (No1)'	0.0001281	2.08114e-06	-1.78925	-0.983754
'F6PANo2'	'Fructose 6-phosphate aldolase (No2)'	373.51	1.41481e-05	-7.4216	-1
'AGMHENo1'	'ADP-D-glycero-D-manno-heptose epimerase (No1)'	998.209	4.81898e-09	-11.3163	-1
'IDONDNo1'	'L-idonate 5-dehydrogenase (No1)'	1000	0.305111	-3.51554	-0.999695
'IDOND2No1'	'L-indonate 5-dehydrogenase (NADP) (No1)'	1000	0.305111	-3.51554	-0.999695
'HPYRRyNo1'	'Hydroxypyruvate reductase (NADPH) (No1)'	671.775	0.000434171	-6.18956	-0.999999
'AGDCNo1'	'N-acetylglucosamine-6-phosphate deacetylase (No1)'	27.9886	8.55264e-06	-6.51488	-1
'ASNNNo1'	'L-asparaginase (No1)'	578.584	0.000816033	-5.85066	-0.999999
'ASPCTNo1'	'Aspartate carbamoyltransferase (No1)'	1.14888e-06	1.14868e-06	-7.37724e-05	-0.000169853
'ASPCTNo2'	'Aspartate carbamoyltransferase (No2)'	511.998	1.14479e-05	-7.65054	-1
'DMPPSNo1'	'1-hydroxy-2-methyl-2-(E)-butenyl 4-diphosphate reductase (dmpp) (No1)'	1013.29	0.000125862	-6.90584	-1
'IPDPSNo1'	'1-hydroxy-2-methyl-2-(E)-butenyl 4-diphosphate reductase (ipdp) (No1)'	2.23503e-06	1.09176e-06	-0.311155	-0.511522
'DAPENo1'	'Diaminopimelate epimerase (No1)'	1000	0.00432405	-5.36411	-0.999996
'DHDPRyNo1'	'Dihydrodipicolinate reductase (NADPH) (No1)'	1000	0.00432405	-5.36411	-0.999996
'HSKNo1'	'Homoserine kinase (No1)'	998.209	1.41481e-05	-7.84852	-1
'arm_SDPTA'	'Succinyldiaminopimelate transaminase (arm)'	367.005	1.41481e-05	-7.41397	-1
'SDPTANo1'	'Succinyldiaminopimelate transaminase (No1)'	368.052	1.41481e-05	-7.41521	-1
'SDPTANo2'	'Succinyldiaminopimelate transaminase (No2)'	359.314	1.41481e-05	-7.40478	-1
'SDPTANo3'	'Succinyldiaminopimelate transaminase (No3)'	998.209	4.81898e-09	-11.3163	-1
'SDPTANo4'	'Succinyldiaminopimelate transaminase (No4)'	998.209	4.81898e-09	-11.3163	-1
'SDPTANo5'	'Succinyldiaminopimelate transaminase (No5)'	1.14888e-06	1.14868e-06	-7.50617e-05	-0.000172821
'THRSNo1'	'Threonine synthase (No1)'	1.14888e-06	1.14868e-06	-7.50617e-05	-0.000172821
'HSSTNo1'	'Homoserine O-succinyltransferase (No1)'	1.14888e-06	1.14868e-06	-7.50617e-05	-0.000172821
'PPNDHNo1'	'Prephenate dehydratase (No1)'	1.14888e-06	1.14868e-06	-7.37943e-05	-0.000169903
'arm_DDPA'	'3-deoxy-D-arabino-heptulosonate 7-phosphate synthetase (arm)'	0.000628435	1.43642e-05	-1.64098	-0.977143
'DDPANo2'	'3-deoxy-D-arabino-heptulosonate 7-phosphate synthetase (No2)'	0.000149354	3.30819e-06	-1.65463	-0.97785
'NNAMNo1'	'Nicotinamidase (No1)'	1.14888e-06	1.14868e-06	-7.50617e-05	-0.000172821
'P5CDNo1'	'1-pyrroline-5-carboxylate dehydrogenase (No1)'	1.14888e-06	1.14868e-06	-7.50617e-05	-0.000172821
'SPMDAT1No1'	'Spermidine acetyltransferase (No1)'	1.14888e-06	1.14868e-06	-7.50617e-05	-0.000172821
'SPMDAT2No1'	'Spermidine acetyltransferase (N8) (No1)'	1.14888e-06	1.14868e-06	-7.50617e-05	-0.000172821
'TDPADGATNo1'	'DTDP-4-amino-4,6-dideoxy-D-glucose acetyltransferase (No1)'	1.14888e-06	1.14868e-06	-7.51156e-05	-0.000172945
'MALSNo1'	'Malate synthase (No1)'	2.74439e-07	1.34056e-07	-0.31116	-0.511528
'MALSNo2'	'Malate synthase (No2)'	1000	0.0125909	-4.89994	-0.999987
'TRE6PPNo1'	'Trehalose-phosphatase (No1)'	999.876	0.00618111	-5.20888	-0.999994
'arm_ADPRDP'	'ADPribose diphosphatase (arm)'	999.116	0.00447476	-5.34885	-0.999996
'ADPRDPNo1'	'ADPribose diphosphatase (No1)'	998.209	0.0124072	-4.90555	-0.999988
'ADPRDPNo2'	'ADPribose diphosphatase (No2)'	1000	0.0726599	-4.1387	-0.999927
'M1PDNo1'	'Mannitol-1-phosphate 5-dehydrogenase (No1)'	139.252	4.85084e-05	-6.45799	-1
'G3PD2No1'	'Glycerol-3-phosphate dehydrogenase (NADP) (No1)'	1000	0.305111	-3.51554	-0.999695
'GALS3No1'	'A-galactosidase (melibiose) (No1)'	1000	0.305111	-3.51554	-0.999695
'FCINo1'	'L-fucose isomerase (No1)'	1000	0.00489362	-5.31037	-0.999995
'FCLPANo1'	'L-fuculose 1-phosphate aldolase (No1)'	1000	0.00151216	-5.8204	-0.999998
'FCLPANo2'	'L-fuculose 1-phosphate aldolase (No2)'	1000	0.00151216	-5.8204	-0.999998
'ACCOALNo2'	'Acetate-CoA ligase (ADP-forming) (No2)'	998.209	0.00940543	-5.02584	-0.999991
'U23GAATNo1'	'UDP-3-O-(3-hydroxymyristoyl)glucosamine acyltransferase (No1)'	578.584	0.000816033	-5.85066	-0.999999
'arm_HPYRRx'	'Hydroxypyruvate reductase (NADH) (arm)'	1000	0.000578445	-6.23774	-0.999999
'GLYCDxNo1'	'Glycerol dehydrogenase (No1)'	1000	0.305111	-3.51554	-0.999695
'ASP1DCNo1'	'Aspartate 1-decarboxylase (No1)'	1999.42	0.0157318	-5.10412	-0.999992
'UHGADANo1'	'UDP-3-O-acetylglucosamine deacetylase (No1)'	12.7714	5.53292e-06	-6.36328	-1
'PRPPSNo1'	'Phosphoribosylpyrophosphate synthetase (No1)'	1.14888e-06	1.14876e-06	-4.34273e-05	-9.999e-05
'arm_CYSS'	'Cysteine synthase (arm)'	998.209	0.000883731	-6.0529	-0.999999
'ASPKNo1'	'Aspartate kinase (No1)'	2000	0.457666	-3.64048	-0.999771
'ASCBPLNo1'	'L-ascorbate 6-phosphate lactonase (No1)'	1000	0.101704	-3.99266	-0.999898
'ACBIPGTNo1'	'Adenosyl cobinamide phosphate guanyltransferase (No1)'	1000	0.101704	-3.99266	-0.999898
'HPPPNDONo1'	'2,3-dihydroxypheylpropionate 1,2-dioxygenase (No1)'	1000	0.305111	-3.51554	-0.999695
'DHCINDONo1'	'2,3-dihydroxycinnamate 1,2-dioxygenase (No1)'	1000	0.305111	-3.51554	-0.999695
'ENTCSNo1'	'Enterochelin synthase (No1)'	1000	6.74584e-05	-7.17096	-1
'SULRNo1'	'Sulfite reductase (NADPH2) (No1)'	1000	0.305111	-3.51554	-0.999695
'URDGLYCDNo1'	'Ureidoglycolate dehydrogenase (No1)'	1000	0.305111	-3.51554	-0.999695
'CBMKrNo1'	'Carbamate kinase (No1)'	1000	0.305111	-3.51554	-0.999695
'AMANAPErNo1'	'N-acetylmannosamine 6-phosphate epimerase (No1)'	7.68521e-08	3.75146e-08	-0.311456	-0.51186
'CYTDHNo1'	'Cytidine hydrolase (No1)'	1000	0.00288577	-5.53974	-0.999997
'CYTDHNo2'	'Cytidine hydrolase (No2)'	1000	0.0204317	-4.6897	-0.99998
'CYTDHNo3'	'Cytidine hydrolase (No3)'	1000	0.0197422	-4.70461	-0.99998
'PSERTNo1'	'Phosphoserine transaminase (No1)'	1000	0.0201131	-4.69652	-0.99998
'AIRC2No1'	'Phosphoribosylaminoimidazole carboxylase (No1)'	1000	0.0204317	-4.6897	-0.99998
'GAPDNo1'	'Glyceraldehyde-3-phosphate dehydrogenase (No1)'	1000	0.0200491	-4.69791	-0.99998
'GNDNo1'	'Phosphogluconate dehydrogenase (No1)'	1000	1.30045	-2.88591	-0.9987
'TAUDONo1'	'Taurine dioxygenase (No1)'	1000	1.73251	-2.76132	-0.998267
'ME2No1'	'Malic enzyme (NADP) (No1)'	1000	1.16015	-2.93549	-0.99884
'ARGSLNo1'	'Argininosuccinate lyase (No1)'	1000	0.0201131	-4.69652	-0.99998
'CBPSNo1'	'Carbamoyl-phosphate synthase (glutamine-hydrolysing) (No1)'	1000	0.0200491	-4.69791	-0.99998
'GLU5KNo1'	'Glutamate 5-kinase (No1)'	1000	0.0197422	-4.70461	-0.99998
'IPPSNo1'	'2-isopropylmalate synthase (No1)'	1000	0.305111	-3.51554	-0.999695
'MLTG1No1'	'Maltodextrin glucosidase (maltotriose) (No1)'	0.000384299	0.000384253	-5.1526e-05	-0.000118636
'AMALT3No1'	'Amylomaltase (maltopentaose) (No1)'	0.000384299	0.000384253	-5.1526e-05	-0.000118636
'MLTP3No1'	'Maltodextrin phosphorylase (maltoheptaose) (No1)'	0.000384299	0.000384252	-5.28456e-05	-0.000121674
'SPODMNo1'	'Superoxide dismutase (No1)'	1000	0.0255984	-4.59179	-0.999974
'SPODMNo2'	'Superoxide dismutase (No2)'	252.774	0.00018479	-6.13605	-0.999999
'AHCYSNSNo1'	'S-adenosylhomocysteine nucleosidase (No1)'	252.774	0.00018479	-6.13605	-0.999999
'arm_NTPP4'	'Nucleoside triphosphate pyrophosphorylase (ctp) (arm)'	1000	0.00405218	-5.39231	-0.999996
'NTPP4No2'	'Nucleoside triphosphate pyrophosphorylase (ctp) (No2)'	500	0.00763171	-4.81635	-0.999985
'NTPP3No1'	'Nucleoside triphosphate pyrophosphorylase (dctp) (No1)'	500	1.31608e-05	-7.57969	-1
'NTPP3No2'	'Nucleoside triphosphate pyrophosphorylase (dctp) (No2)'	0.000384299	0.000384253	-5.1526e-05	-0.000118636
'arm_NTPP6'	'Nucleoside triphosphate pyrophosphorylase (atp) (arm)'	1000	0.00243557	-5.6134	-0.999998
'NTPP6No1'	'Nucleoside triphosphate pyrophosphorylase (atp) (No1)'	0	0	0	0
'NTPP6No2'	'Nucleoside triphosphate pyrophosphorylase (atp) (No2)'	1000	0.152555	-3.81657	-0.999847
'arm_NTPP7'	'Nucleoside triphosphate pyrophosphorylase (dttp) (arm)'	1000	0.152555	-3.81657	-0.999847
'NTPP7No1'	'Nucleoside triphosphate pyrophosphorylase (dttp) (No1)'	1000	0.0202382	-4.69383	-0.99998
'arm_CYANST'	'Cyanide sulfurtransferase (arm)'	88.3898	3.47905e-05	-6.40494	-1
'CYANSTNo2'	'Cyanide sulfurtransferase (No2)'	823.333	0.000407403	-6.30555	-1
'DBTSNo1'	'Dethiobiotin synthase (No1)'	163.962	0.000186638	-5.94374	-0.999999
'DCTPDNo1'	'DCTP deaminase (No1)'	163.962	0.000186638	-5.94374	-0.999999
'GMPRNo1'	'GMP reductase (No1)'	1000	0.173638	-3.76035	-0.999826
'NADS1No1'	'NAD synthase (nh3) (No1)'	1000	0.32816	-3.48391	-0.999672
'NTRIR2xNo1'	'Nitrite Reductase (NADH) (No1)'	1000	0.152555	-3.81657	-0.999847
'arm_OCBT'	'Ornithine carbamoyltransferase (arm)'	1000	0.152555	-3.81657	-0.999847
'OCBTNo1'	'Ornithine carbamoyltransferase (No1)'	1000	0.152555	-3.81657	-0.999847
'OCBTNo2'	'Ornithine carbamoyltransferase (No2)'	1000	0.0220573	-4.65645	-0.999978
'GARFTNo1'	'Phosphoribosylglycinamide formyltransferase (No1)'	1000	0.152555	-3.81657	-0.999847
'GPDDA1No1'	'Glycerophosphodiester phosphodiesterase (Glycerophosphocholine) (No1)'	0.00298995	0.00298964	-4.48334e-05	-0.000103227
'GPDDA2No1'	'Glycerophosphodiester phosphodiesterase (Glycerophosphoethanolamine) (No1)'	1000	0.257344	-3.58949	-0.999743
'arm_PHETA1'	'Phenylalanine transaminase (arm)'	1000	0.305111	-3.51554	-0.999695
'PHETA1No1'	'Phenylalanine transaminase (No1)'	1000	0.152555	-3.81657	-0.999847
'PHETA1No2'	'Phenylalanine transaminase (No2)'	1000	0.152555	-3.81657	-0.999847
'PPNDNo1'	'Prephenate dehydrogenase (No1)'	1000	0.152555	-3.81657	-0.999847
'TRPS1No1'	'Tryptophan synthase (indoleglycerol phosphate) (No1)'	1000	0.305111	-3.51554	-0.999695
'PRAMPCNo1'	'Phosphoribosyl-AMP cyclohydrolase (No1)'	1000	1.07122	-2.97012	-0.998929
'DXYLKNo1'	'1-Deoxy-D-xylulose kinase (No1)'	49.4264	2.9072e-05	-6.23048	-0.999999
'MDH3No1'	'Malate dehydrogenase (menaquinone 8 as acceptor) (No1)'	1000	0.0199821	-4.69936	-0.99998
'SOTANo1'	'Succinylornithine transaminase (No1)'	823.333	0.000407403	-6.30555	-1
'PRFGSNo1'	'Phosphoribosylformylglycinamidine synthase (No1)'	1000	6.14948	-2.21116	-0.993851
'NTP3No1'	'Nucleoside-triphosphatase (GTP) (No1)'	1000	0.00766656	-5.1154	-0.999992
'NTP3No7'	'Nucleoside-triphosphatase (GTP) (No7)'	234.848	0.000686564	-5.53411	-0.999997
'MOAT2No1'	'3-deoxy-D-manno-octulosonic acid transferase (No1)'	0.000384299	0.000384234	-7.40995e-05	-0.000170606
'NADH5No3'	'NADH dehydrogenase (ubiquinone-8 ) (No3)'	27.9886	8.55264e-06	-6.51488	-1
'PPPNDONo1'	'Phenylpropanoate Dioxygenase (No1)'	0.0001281	0.000128082	-6.14585e-05	-0.000141503
'arm_CHRPL'	'Chorismate pyruvate lyase (arm)'	999.873	0.00644809	-5.19051	-0.999994
'FBA3No1'	'Sedoheptulose 1,7-bisphosphate D-glyceraldehyde-3-phosphate-lyase (No1)'	163.962	0.000186638	-5.94374	-0.999999
'GLUDCNo1'	'Glutamate Decarboxylase (No1)'	1000	0.152555	-3.81657	-0.999847
'GLUDCNo2'	'Glutamate Decarboxylase (No2)'	1000	0.152555	-3.81657	-0.999847
'HSDyNo2'	'Homoserine dehydrogenase (NADPH) (No2)'	0.000384299	0.000512307	0.124861	0.333096
'arm_CYSTL'	'Cystathionine b-lyase (arm)'	1000	0.0191042	-4.71887	-0.999981
'arm_SSALy'	'Succinate-semialdehyde dehydrogenase (NADP) (arm)'	671.775	0.00069032	-5.98817	-0.999999
'SSALyNo1'	'Succinate-semialdehyde dehydrogenase (NADP) (No1)'	823.333	0.000407403	-6.30555	-1
'arm_FACOAL180t2pp'	'Fatty-acid-CoA ligase (octadecanoate transport via vectoral Co-A coupling) (arm)'	1000	0.152555	-3.81657	-0.999847
'FACOAL180t2ppNo1'	'Fatty-acid-CoA ligase (octadecanoate transport via vectoral Co-A coupling) (No1)'	1000	0.305111	-3.51554	-0.999695
'PHYTSppNo1'	'Phytase (periplasm) (No1)'	1000	0.305111	-3.51554	-0.999695
'NTP3ppNo1'	'Nucleoside-triphosphatase (GTP) (periplasm) (No1)'	1000	0.0353796	-4.45125	-0.999965
					-0.999998

## Sheet: Ecoli_chem
rxns	rxnNames	GEM flux variability ranges [mmol/gDw h]	ecModel flux variability ranges [mmol/gDw h]	log10FC	rel_diff
'NTP3ppNo1'	'Nucleoside-triphosphatase (GTP) (periplasm) (No1)'	0.180641	0.0303653	-0.774438	-0.831902
'PHYTSppNo1'	'Phytase (periplasm) (No1)'	0.117872	0.0131022	-0.954064	-0.888843
'FACOAL180t2ppNo1'	'Fatty-acid-CoA ligase (octadecanoate transport via vectoral Co-A coupling) (No1)'	0.117872	0.0131022	-0.954064	-0.888843
'arm_FACOAL180t2pp'	'Fatty-acid-CoA ligase (octadecanoate transport via vectoral Co-A coupling) (arm)'	0.0589359	0.00655112	-0.954064	-0.888843
'SSALyNo1'	'Succinate-semialdehyde dehydrogenase (NADP) (No1)'	0.00647397	0.000759263	-0.930779	-0.882721
'arm_SSALy'	'Succinate-semialdehyde dehydrogenase (NADP) (arm)'	0.00125819	0.00014756	-0.930779	-0.882721
'arm_CYSTL'	'Cystathionine b-lyase (arm)'	0.0294679	0.00327556	-0.954064	-0.888843
'HSDyNo2'	'Homoserine dehydrogenase (NADPH) (No2)'	6.69134e-05	0.000133795	0.300927	0.999527
'GLUDCNo2'	'Glutamate Decarboxylase (No2)'	0.0589359	0.00655112	-0.954064	-0.888843
'GLUDCNo1'	'Glutamate Decarboxylase (No1)'	0.0589359	0.00655112	-0.954064	-0.888843
'FBA3No1'	'Sedoheptulose 1,7-bisphosphate D-glyceraldehyde-3-phosphate-lyase (No1)'	0.000596316	6.62845e-05	-0.954064	-0.888843
'arm_CHRPL'	'Chorismate pyruvate lyase (arm)'	0.0392906	0.00436741	-0.954064	-0.888843
'PPPNDONo1'	'Phenylpropanoate Dioxygenase (No1)'	2.23045e-05	2.23006e-05	-7.59162e-05	-0.000174788
'NADH5No3'	'NADH dehydrogenase (ubiquinone-8 ) (No3)'	5.18422e-05	5.7626e-06	-0.954064	-0.888843
'MOAT2No1'	'3-deoxy-D-manno-octulosonic acid transferase (No1)'	6.69134e-05	6.69018e-05	-7.53553e-05	-0.000173497
'NTP3No7'	'Nucleoside-triphosphatase (GTP) (No7)'	0.000489095	5.43661e-05	-0.954064	-0.888843
'NTP3No1'	'Nucleoside-triphosphatase (GTP) (No1)'	0.0294679	0.00327556	-0.954064	-0.888843
'PRFGSNo1'	'Phosphoribosylformylglycinamidine synthase (No1)'	0.0170619	0.00209481	-0.910883	-0.877223
'SOTANo1'	'Succinylornithine transaminase (No1)'	0.00647397	0.000759263	-0.930779	-0.882721
'MDH3No1'	'Malate dehydrogenase (menaquinone 8 as acceptor) (No1)'	0.0294679	0.00327556	-0.954064	-0.888843
'DXYLKNo1'	'1-Deoxy-D-xylulose kinase (No1)'	0.000230744	2.56487e-05	-0.954064	-0.888843
'PRAMPCNo1'	'Phosphoribosyl-AMP cyclohydrolase (No1)'	0.784855	0.62703	-0.0975007	-0.201087
'TRPS1No1'	'Tryptophan synthase (indoleglycerol phosphate) (No1)'	0.117872	0.0131022	-0.954064	-0.888843
'PPNDNo1'	'Prephenate dehydrogenase (No1)'	0.0589359	0.00655112	-0.954064	-0.888843
'PHETA1No2'	'Phenylalanine transaminase (No2)'	0.0589359	0.00655112	-0.954064	-0.888843
'PHETA1No1'	'Phenylalanine transaminase (No1)'	0.0589359	0.00655112	-0.954064	-0.888843
'arm_PHETA1'	'Phenylalanine transaminase (arm)'	0.117872	0.0131022	-0.954064	-0.888843
'GPDDA2No1'	'Glycerophosphodiester phosphodiesterase (Glycerophosphoethanolamine) (No1)'	0.180641	0.0305055	-0.772437	-0.831126
'GPDDA1No1'	'Glycerophosphodiester phosphodiesterase (Glycerophosphocholine) (No1)'	0.000520604	0.000520512	-7.64464e-05	-0.000176009
'GARFTNo1'	'Phosphoribosylglycinamide formyltransferase (No1)'	0.0589359	0.00655112	-0.954064	-0.888843
'OCBTNo2'	'Ornithine carbamoyltransferase (No2)'	0.0235744	0.00262045	-0.954064	-0.888843
'OCBTNo1'	'Ornithine carbamoyltransferase (No1)'	0.0589359	0.00655112	-0.954064	-0.888843
'arm_OCBT'	'Ornithine carbamoyltransferase (arm)'	0.0589359	0.00655112	-0.954064	-0.888843
'NTRIR2xNo1'	'Nitrite Reductase (NADH) (No1)'	0.0589359	0.00655112	-0.954064	-0.888843
'NADS1No1'	'NAD synthase (nh3) (No1)'	0.157162	0.0174696	-0.954064	-0.888843
'GMPRNo1'	'GMP reductase (No1)'	0.180641	0.0305055	-0.772437	-0.831126
'DCTPDNo1'	'DCTP deaminase (No1)'	0.000596316	6.62845e-05	-0.954064	-0.888843
'DBTSNo1'	'Dethiobiotin synthase (No1)'	0.000596316	6.62845e-05	-0.954064	-0.888843
'CYANSTNo2'	'Cyanide sulfurtransferase (No2)'	0.00647397	0.000759263	-0.930779	-0.882721
'arm_CYANST'	'Cyanide sulfurtransferase (arm)'	0.00035291	3.92282e-05	-0.954064	-0.888843
'NTPP7No1'	'Nucleoside triphosphate pyrophosphorylase (dttp) (No1)'	0.0294679	0.00327556	-0.954064	-0.888843
'arm_NTPP7'	'Nucleoside triphosphate pyrophosphorylase (dttp) (arm)'	0.0589359	0.00655112	-0.954064	-0.888843
'NTPP6No2'	'Nucleoside triphosphate pyrophosphorylase (atp) (No2)'	0.0589359	0.00655112	-0.954064	-0.888843
'arm_NTPP6'	'Nucleoside triphosphate pyrophosphorylase (atp) (arm)'	0.00182843	0.000209636	-0.940612	-0.885346
'NTPP3No2'	'Nucleoside triphosphate pyrophosphorylase (dctp) (No2)'	6.69134e-05	6.68988e-05	-9.4754e-05	-0.000218155
'NTPP3No1'	'Nucleoside triphosphate pyrophosphorylase (dctp) (No1)'	0.00477912	0.000569662	-0.92373	-0.880802
'NTPP4No2'	'Nucleoside triphosphate pyrophosphorylase (ctp) (No2)'	0.00990178	0.00151271	-0.815957	-0.847228
'arm_NTPP4'	'Nucleoside triphosphate pyrophosphorylase (ctp) (arm)'	999.973	0.601412	-3.22082	-0.999399
'AHCYSNSNo1'	'S-adenosylhomocysteine nucleosidase (No1)'	0.00256846	0.000308288	-0.920716	-0.879972
'SPODMNo2'	'Superoxide dismutase (No2)'	0.00256846	0.000308288	-0.920716	-0.879972
'SPODMNo1'	'Superoxide dismutase (No1)'	0.0294679	0.00327556	-0.954064	-0.888843
'MLTP3No1'	'Maltodextrin phosphorylase (maltoheptaose) (No1)'	6.69134e-05	6.68987e-05	-9.50692e-05	-0.000218881
'AMALT3No1'	'Amylomaltase (maltopentaose) (No1)'	6.69134e-05	6.68988e-05	-9.4754e-05	-0.000218155
'MLTG1No1'	'Maltodextrin glucosidase (maltotriose) (No1)'	6.69134e-05	6.68988e-05	-9.4754e-05	-0.000218155
'IPPSNo1'	'2-isopropylmalate synthase (No1)'	0.117872	0.0131022	-0.954064	-0.888843
'GLU5KNo1'	'Glutamate 5-kinase (No1)'	0.0294679	0.00327556	-0.954064	-0.888843
'CBPSNo1'	'Carbamoyl-phosphate synthase (glutamine-hydrolysing) (No1)'	0.0294679	0.00327556	-0.954064	-0.888843
'ARGSLNo1'	'Argininosuccinate lyase (No1)'	0.0294679	0.00327556	-0.954064	-0.888843
'ME2No1'	'Malic enzyme (NADP) (No1)'	0.784855	0.627039	-0.0974948	-0.201077
'TAUDONo1'	'Taurine dioxygenase (No1)'	0.784855	0.627152	-0.0974163	-0.200932
'GNDNo1'	'Phosphogluconate dehydrogenase (No1)'	0.784855	0.627052	-0.0974857	-0.20106
'GAPDNo1'	'Glyceraldehyde-3-phosphate dehydrogenase (No1)'	0.0294679	0.00327556	-0.954064	-0.888843
'AIRC2No1'	'Phosphoribosylaminoimidazole carboxylase (No1)'	0.0294679	0.00327556	-0.954064	-0.888843
'PSERTNo1'	'Phosphoserine transaminase (No1)'	0.0294679	0.00327556	-0.954064	-0.888843
'CYTDHNo3'	'Cytidine hydrolase (No3)'	0.0294679	0.00327556	-0.954064	-0.888843
'CYTDHNo2'	'Cytidine hydrolase (No2)'	0.0294679	0.00327556	-0.954064	-0.888843
'CYTDHNo1'	'Cytidine hydrolase (No1)'	0.0170619	0.00209481	-0.910883	-0.877223
'AMANAPErNo1'	'N-acetylmannosamine 6-phosphate epimerase (No1)'	1.33814e-08	8.4614e-09	-0.199059	-0.367674
'CBMKrNo1'	'Carbamate kinase (No1)'	0.117872	0.0131022	-0.954064	-0.888843
'URDGLYCDNo1'	'Ureidoglycolate dehydrogenase (No1)'	0.117872	0.0131022	-0.954064	-0.888843
'SULRNo1'	'Sulfite reductase (NADPH2) (No1)'	0.117872	0.0131022	-0.954064	-0.888843
'ENTCSNo1'	'Enterochelin synthase (No1)'	0.0235744	0.00262045	-0.954064	-0.888843
'DHCINDONo1'	'2,3-dihydroxycinnamate 1,2-dioxygenase (No1)'	0.117872	0.0131022	-0.954064	-0.888843
'HPPPNDONo1'	'2,3-dihydroxypheylpropionate 1,2-dioxygenase (No1)'	0.117872	0.0131022	-0.954064	-0.888843
'ACBIPGTNo1'	'Adenosyl cobinamide phosphate guanyltransferase (No1)'	0.0392906	0.00436741	-0.954064	-0.888843
'ASCBPLNo1'	'L-ascorbate 6-phosphate lactonase (No1)'	0.0392906	0.00436741	-0.954064	-0.888843
'ASPKNo1'	'Aspartate kinase (No1)'	0.176808	0.0196534	-0.954064	-0.888843
'arm_CYSS'	'Cysteine synthase (arm)'	0.014734	0.00163778	-0.954064	-0.888843
'PRPPSNo1'	'Phosphoribosylpyrophosphate synthetase (No1)'	2.0004e-07	2.00005e-07	-7.53553e-05	-0.000173497
'UHGADANo1'	'UDP-3-O-acetylglucosamine deacetylase (No1)'	2.37326e-05	2.63803e-06	-0.954064	-0.888843
'ASP1DCNo1'	'Aspartate 1-decarboxylase (No1)'	1999.9	0.47663	-3.62283	-0.999762
'GLYCDxNo1'	'Glycerol dehydrogenase (No1)'	0.117872	0.0131022	-0.954064	-0.888843
'arm_HPYRRx'	'Hydroxypyruvate reductase (NADH) (arm)'	0.014734	0.00163778	-0.954064	-0.888843
'U23GAATNo1'	'UDP-3-O-(3-hydroxymyristoyl)glucosamine acyltransferase (No1)'	0.00155094	0.000172398	-0.954064	-0.888843
'ACCOALNo2'	'Acetate-CoA ligase (ADP-forming) (No2)'	0.014734	0.00163778	-0.954064	-0.888843
'FCLPANo2'	'L-fuculose 1-phosphate aldolase (No2)'	1000	0.224826	-3.64815	-0.999775
'FCLPANo1'	'L-fuculose 1-phosphate aldolase (No1)'	1000	0.224826	-3.64815	-0.999775
'FCINo1'	'L-fucose isomerase (No1)'	0.022212	0.00316295	-0.846496	-0.857602
'GALS3No1'	'A-galactosidase (melibiose) (No1)'	0.117872	0.0131022	-0.954064	-0.888843
'G3PD2No1'	'Glycerol-3-phosphate dehydrogenase (NADP) (No1)'	0.117872	0.0131022	-0.954064	-0.888843
'M1PDNo1'	'Mannitol-1-phosphate 5-dehydrogenase (No1)'	0.000358455	3.98446e-05	-0.954064	-0.888843
'ADPRDPNo2'	'ADPribose diphosphatase (No2)'	0.180641	0.0293896	-0.788622	-0.837303
'ADPRDPNo1'	'ADPribose diphosphatase (No1)'	0.0108402	0.00353045	-0.487208	-0.674319
'arm_ADPRDP'	'ADPribose diphosphatase (arm)'	0.0128117	0.00550174	-0.367107	-0.570569
'TRE6PPNo1'	'Trehalose-phosphatase (No1)'	0.0239296	0.00738654	-0.510495	-0.691322
'MALSNo2'	'Malate synthase (No2)'	0.0238445	0.00730145	-0.51398	-0.693789
'MALSNo1'	'Malate synthase (No1)'	4.77846e-08	3.02157e-08	-0.199056	-0.367669
'TDPADGATNo1'	'DTDP-4-amino-4,6-dideoxy-D-glucose acetyltransferase (No1)'	2.0004e-07	2.00005e-07	-7.58084e-05	-0.00017454
'SPMDAT2No1'	'Spermidine acetyltransferase (N8) (No1)'	2.0004e-07	2.00005e-07	-7.59234e-05	-0.000174805
'SPMDAT1No1'	'Spermidine acetyltransferase (No1)'	2.0004e-07	2.00005e-07	-7.59234e-05	-0.000174805
'P5CDNo1'	'1-pyrroline-5-carboxylate dehydrogenase (No1)'	2.0004e-07	2.00005e-07	-7.59234e-05	-0.000174805
'NNAMNo1'	'Nicotinamidase (No1)'	2.0004e-07	2.00005e-07	-7.59234e-05	-0.000174805
'DDPANo2'	'3-deoxy-D-arabino-heptulosonate 7-phosphate synthetase (No2)'	2.60052e-05	2.60006e-05	-7.62273e-05	-0.000175504
'arm_DDPA'	'3-deoxy-D-arabino-heptulosonate 7-phosphate synthetase (arm)'	0.000109422	0.000109403	-7.68423e-05	-0.00017692
'PPNDHNo1'	'Prephenate dehydratase (No1)'	2.0004e-07	1.9999e-07	-0.000108921	-0.000250768
'HSSTNo1'	'Homoserine O-succinyltransferase (No1)'	2.0004e-07	2.00005e-07	-7.59234e-05	-0.000174805
'THRSNo1'	'Threonine synthase (No1)'	2.0004e-07	2.00005e-07	-7.59234e-05	-0.000174805
'SDPTANo5'	'Succinyldiaminopimelate transaminase (No5)'	2.0004e-07	2.00005e-07	-7.59234e-05	-0.000174805
'SDPTANo4'	'Succinyldiaminopimelate transaminase (No4)'	0.014734	7.16338e-07	-4.3132	-0.999951
'SDPTANo3'	'Succinyldiaminopimelate transaminase (No3)'	0.014734	7.16338e-07	-4.3132	-0.999951
'SDPTANo2'	'Succinyldiaminopimelate transaminase (No2)'	0.00406454	0.000451801	-0.954064	-0.888843
'SDPTANo1'	'Succinyldiaminopimelate transaminase (No1)'	0.00406454	0.000451801	-0.954064	-0.888843
'arm_SDPTA'	'Succinyldiaminopimelate transaminase (arm)'	0.00406454	0.000451801	-0.954064	-0.888843
'HSKNo1'	'Homoserine kinase (No1)'	0.014734	0.000451952	-1.51323	-0.969326
'DHDPRyNo1'	'Dihydrodipicolinate reductase (NADPH) (No1)'	0.0590864	0.00670163	-0.945307	-0.886579
'DAPENo1'	'Diaminopimelate epimerase (No1)'	0.0590864	0.00670163	-0.945307	-0.886579
'IPDPSNo1'	'1-hydroxy-2-methyl-2-(E)-butenyl 4-diphosphate reductase (ipdp) (No1)'	3.89159e-07	2.46076e-07	-0.199057	-0.367671
'DMPPSNo1'	'1-hydroxy-2-methyl-2-(E)-butenyl 4-diphosphate reductase (dmpp) (No1)'	0.022846	0.00713344	-0.505512	-0.68776
'ASPCTNo2'	'Aspartate carbamoyltransferase (No2)'	0.00523875	0.000582322	-0.954064	-0.888843
'ASPCTNo1'	'Aspartate carbamoyltransferase (No1)'	2.0004e-07	2.00005e-07	-7.59267e-05	-0.000174812
'ASNNNo1'	'L-asparaginase (No1)'	0.00155094	0.000172398	-0.954064	-0.888843
'AGDCNo1'	'N-acetylglucosamine-6-phosphate deacetylase (No1)'	5.18422e-05	5.7626e-06	-0.954064	-0.888843
'HPYRRyNo1'	'Hydroxypyruvate reductase (NADPH) (No1)'	0.00125819	0.00014756	-0.930779	-0.882721
'IDOND2No1'	'L-indonate 5-dehydrogenase (NADP) (No1)'	0.117872	0.0131022	-0.954064	-0.888843
'IDONDNo1'	'L-idonate 5-dehydrogenase (No1)'	0.117872	0.0131022	-0.954064	-0.888843
'AGMHENo1'	'ADP-D-glycero-D-manno-heptose epimerase (No1)'	0.014734	7.16338e-07	-4.3132	-0.999951
'F6PANo2'	'Fructose 6-phosphate aldolase (No2)'	0.00406454	0.000451801	-0.954064	-0.888843
'F6PANo1'	'Fructose 6-phosphate aldolase (No1)'	2.23045e-05	2.2298e-05	-0.000124839	-0.000287412
'arm_F6PA'	'Fructose 6-phosphate aldolase (arm)'	0.000489095	5.43661e-05	-0.954064	-0.888843
'UAGPT3No1'	'UDP-N-acetylglucosamine-N-acetylmuramyl-(pentapeptide)pyrophosphoryl-undecaprenol N-acetylglucosamine transferase (No1)'	2.0004e-07	1.99984e-07	-0.00012098	-0.000278528
'NTD7No1'	'5''-nucleotidase (AMP) (No1)'	0.011106	0.00158147	-0.846497	-0.857602
'NTD1No2'	'5''-nucleotidase (dUMP) (No2)'	0.0107156	0.00119111	-0.954064	-0.888843
'NTD1No1'	'5''-nucleotidase (dUMP) (No1)'	0.014734	7.16336e-07	-4.3132	-0.999951
'arm_NTD1'	'5''-nucleotidase (dUMP) (arm)'	0.014734	7.16338e-07	-4.3132	-0.999951
'CTPS2No1'	'CTP synthase (glutamine) (No1)'	0.014734	7.16338e-07	-4.3132	-0.999951
'UPPRTNo1'	'Uracil phosphoribosyltransferase (No1)'	0.014734	7.16338e-07	-4.3132	-0.999951
'DURIK1No1'	'Deoxyuridine kinase (ATP:Deoxyuridine) (No1)'	0.014734	0.000451952	-1.51323	-0.969326
'DDPGALANo1'	'2-dehydro-3-deoxy-6-phosphogalactonate aldolase (No1)'	0.0211154	0.00683271	-0.490006	-0.67641
'UMPKNo2'	'UMP kinase (No2)'	0.00155094	0.000172398	-0.954064	-0.888843
'UMPKNo1'	'UMP kinase (No1)'	0.00155094	0.000172398	-0.954064	-0.888843
'ADCSNo1'	'4-amino-4-deoxychorismate synthase (No1)'	0.014734	0.000451952	-1.51323	-0.969326
'AMPNNo1'	'AMP nucleosidase (No1)'	0.00155094	0.000172398	-0.954064	-0.888843
'GMPS2No1'	'GMP synthase (No1)'	0.00155094	0.000172398	-0.954064	-0.888843
'FMNRx2No3'	'FMN reductase (No3)'	0.00155094	0.000172398	-0.954064	-0.888843
'FMNRx2No2'	'FMN reductase (No2)'	0.00155094	0.000172398	-0.954064	-0.888843
'NADTRHDNo1'	'NAD transhydrogenase (No1)'	0.000358455	3.98446e-05	-0.954064	-0.888843
'DKGLCNR1No2'	'2,5-diketo-D-gluconate reductase (No2)'	2.0004e-07	2.00005e-07	-7.59234e-05	-0.000174805
'DKGLCNR1No1'	'2,5-diketo-D-gluconate reductase (No1)'	2.60052e-05	2.60006e-05	-7.62273e-05	-0.000175504
'arm_DKGLCNR1'	'2,5-diketo-D-gluconate reductase (arm)'	2.60052e-05	2.60006e-05	-7.62273e-05	-0.000175504
'MLTG3No1'	'Maltodextrin glucosidase (maltopentaose) (No1)'	2.60052e-05	2.60007e-05	-7.53553e-05	-0.000173497
'BETALDHyNo1'	'Betaine-aldehyde dehydrogenase (No1)'	2.60052e-05	2.60007e-05	-7.53553e-05	-0.000173497
'BETALDHxNo1'	'Betaine-aldehyde dehydrogenase (No1)'	2.80056e-06	2.80007e-06	-7.59234e-05	-0.000174805
'arm_X5PL3E'	'L-xylulose 5-phosphate 3-epimerase (arm)'	0.117872	0.0131022	-0.954064	-0.888843
'KG6PDCNo2'	'3-keto-L-gulonate 6-phosphate decarboxylase (No2)'	0.117872	0.0131022	-0.954064	-0.888843
'PGMTNo1'	'Phosphoglucomutase (No1)'	2.80056e-06	2.80007e-06	-7.59703e-05	-0.000174913
'arm_PGMT'	'Phosphoglucomutase (arm)'	2.60052e-05	2.60007e-05	-7.53553e-05	-0.000173497
'TRDRNo2'	'Thioredoxin reductase (NADPH) (No2)'	0.000131726	0.000131688	-0.000125407	-0.000288719
'TRDRNo1'	'Thioredoxin reductase (NADPH) (No1)'	0.00406454	0.000451801	-0.954064	-0.888843
'arm_TRDR'	'Thioredoxin reductase (NADPH) (arm)'	0.0115859	0.00797245	-0.16234	-0.311886
'NDPK1No2'	'Nucleoside-diphosphate kinase (ATP:GDP) (No2)'	0.0104459	0.00683256	-0.184364	-0.345912
'NDPK1No1'	'Nucleoside-diphosphate kinase (ATP:GDP) (No1)'	0.014734	0.000451952	-1.51323	-0.969326
'arm_NDPK1'	'Nucleoside-diphosphate kinase (ATP:GDP) (arm)'	0.0222554	0.0079726	-0.445835	-0.641767
'DTMPKNo1'	'DTMP kinase (No1)'	0.014734	0.000451952	-1.51323	-0.969326
'TMAOR2No1'	'Trimethylamine N-oxide reductase (demethylmenaquinol 8) (No1)'	0.0027412	0.000304703	-0.954064	-0.888843
'TMAOR1No2'	'Trimethylamine N-oxide reductase (menaquinol 8) (No2)'	0.117872	0.0131022	-0.954064	-0.888843
'TMAOR1No1'	'Trimethylamine N-oxide reductase (menaquinol 8) (No1)'	0.117872	0.0131022	-0.954064	-0.888843
'arm_TMAOR1'	'Trimethylamine N-oxide reductase (menaquinol 8) (arm)'	0.117872	0.0131022	-0.954064	-0.888843
'GUADNo1'	'Guanine deaminase (No1)'	0.117872	0.0131022	-0.954064	-0.888843
'GSPMDSNo1'	'Glutathionylspermidine synthetase (No1)'	0.117872	0.0131022	-0.954064	-0.888843
'GSPMDANo1'	'Glutathionylspermidine amidase (No1)'	0.117872	0.0131022	-0.954064	-0.888843
'CYNTAHNo1'	'Cyanate aminohydrolase (No1)'	0.117872	0.0131022	-0.954064	-0.888843
'KDOPPNo1'	'3-deoxy-manno-octulosonate-8-phosphatase (No1)'	0.00736699	0.00081889	-0.954064	-0.888843
'KDOPSNo1'	'3-deoxy -D-manno-octulosonic -acid 8-phosphate synthase (No1)'	0.00736699	0.00081889	-0.954064	-0.888843
'HETZKNo1'	'Hydroxyethylthiazole kinase (No1)'	0.00736699	0.00081889	-0.954064	-0.888843
'PNTKNo1'	'Pantothenate kinase (No1)'	2.0004e-07	2.00005e-07	-7.59234e-05	-0.000174805
'HBZOPTNo1'	'Hydroxybenzoate octaprenyltransferase (No1)'	2.0004e-07	2.00005e-07	-7.59234e-05	-0.000174805
'FCLTNo3'	'Ferrochelatase (No3)'	2.0004e-07	2.00005e-07	-7.59234e-05	-0.000174805
'FCLTNo2'	'Ferrochelatase (No2)'	2.0004e-07	2.00005e-07	-7.59234e-05	-0.000174805
'NDPK4No1'	'Nucleoside-diphosphate kinase (ATP:dTDP) (No1)'	0.00125819	0.00014756	-0.930779	-0.882721
'arm_NDPK4'	'Nucleoside-diphosphate kinase (ATP:dTDP) (arm)'	0.0214719	0.00370514	-0.763066	-0.827443
'NDPK3No2'	'Nucleoside-diphosphate kinase (ATP:CDP) (No2)'	0.00523875	0.000582322	-0.954064	-0.888843
'NDPK3No1'	'Nucleoside-diphosphate kinase (ATP:CDP) (No1)'	0.00523875	0.000582322	-0.954064	-0.888843
'arm_NDPK3'	'Nucleoside-diphosphate kinase (ATP:CDP) (arm)'	0.199252	0.0421366	-0.674743	-0.788526
'NDPK2No1'	'Nucleoside-diphosphate kinase (ATP:UDP) (No1)'	0.000260302	0.000260257	-7.53553e-05	-0.000173497
'arm_NDPK2'	'Nucleoside-diphosphate kinase (ATP:UDP) (arm)'	1000	2.53217	-2.59651	-0.997468
'FADRxNo1'	'FAD reductase (No1)'	0.0124076	0.029598	0.377576	1.38548
'CRNCDHNo1'	'Carnityl-CoA dehydratse (No1)'	0.0130287	0.00200023	-0.813821	-0.846475
'CRNCBCTNo1'	'Crotonobetainyl-CoA: carnitine CoA transferase (No1)'	0.00240555	0.000267393	-0.954064	-0.888843
'CRNBTCTNo1'	'Gamma-butyrobetainyl-CoA: carnitine CoA transferase (No1)'	0.117872	0.0131022	-0.954064	-0.888843
'TRPS3No1'	'Tryptophan synthase (indoleglycerol phosphate) (No1)'	0.0589361	0.00741864	-0.900057	-0.874124
'S7PINo1'	'Sedoheptulose 7-phosphate isomerase (No1)'	0.117872	0.0131022	-0.954064	-0.888843
'GMHEPPANo1'	'D-glycero-D-manno-heptose 1,7-bisphosphate phosphatase (No1)'	0.117872	0.0131022	-0.954064	-0.888843
'ADNUCNo1'	'Adenosine hydrolase (No1)'	0.0294679	0.00327556	-0.954064	-0.888843
'GLYATNo1'	'Glycine C-acetyltransferase (No1)'	0.00137862	0.000153243	-0.954064	-0.888843
'NDPK7No1'	'Nucleoside-diphosphate kinase (ATP:dCDP) (No1)'	0.00137862	0.000153243	-0.954064	-0.888843
'G3PD6No1'	'Glycerol-3-phosphate dehydrogenase (menaquinone-8) (No1)'	0.117872	0.0131022	-0.954064	-0.888843
'TDPDRRNo1'	'DTDP-4-dehydrorhamnose reductase (No1)'	0.0589359	0.00655112	-0.954064	-0.888843
'UDPGALMNo1'	'UDPgalactopyranose mutase (No1)'	0.119478	0.0147082	-0.909729	-0.876896
'TDPGDHNo2'	'DTDPglucose 4,6-dehydratase (No2)'	0.00640522	0.000862245	-0.870903	-0.865384
'G1PTTNo2'	'Glucose-1-phosphate thymidylyltransferase (No2)'	0.117872	0.0131022	-0.954064	-0.888843
'2DGULRxNo1'	'2-dehydro-L-gulonate reductase (NADH) (No1)'	0.00318572	0.000354114	-0.954064	-0.888843
'BUTCTNo1'	'Acetyl-CoA:butyrate-CoA transferase (No1)'	0.00318572	0.000354114	-0.954064	-0.888843
'ACACCTNo2'	'Acetyl-CoA:acetoacetyl-CoA transferase (No2)'	0.00245566	0.000272963	-0.954064	-0.888843
'ACACCTNo1'	'Acetyl-CoA:acetoacetyl-CoA transferase (No1)'	0.00245566	0.000272963	-0.954064	-0.888843
'arm_ACACCT'	'Acetyl-CoA:acetoacetyl-CoA transferase (arm)'	0.00240555	0.000267393	-0.954064	-0.888843
'HACD2No2'	'3-hydroxyacyl-CoA dehydrogenase (3-oxohexanoyl-CoA) (No2)'	0.00240555	0.000267393	-0.954064	-0.888843
'HACD1No2'	'3-hydroxyacyl-CoA dehydrogenase (acetoacetyl-CoA) (No2)'	0.00142014	0.000157858	-0.954064	-0.888843
'TREHNo1'	'Alpha,alpha-trehalase (No1)'	0.014734	0.00163778	-0.954064	-0.888843
'UDCPDPNo3'	'Undecaprenyl-diphosphatase (No3)'	0.0589359	0.00655112	-0.954064	-0.888843
'UDCPDPNo2'	'Undecaprenyl-diphosphatase (No2)'	0.014734	0.00163778	-0.954064	-0.888843
'UDCPDPNo1'	'Undecaprenyl-diphosphatase (No1)'	0.014734	0.00163778	-0.954064	-0.888843
'arm_UDCPDP'	'Undecaprenyl-diphosphatase (arm)'	6.81769	3.98925	-0.232746	-0.414867
'PACCOALNo1'	'Phenylacetate-CoA ligase (No1)'	0.00142014	0.000157858	-0.954064	-0.888843
'MLTP2No1'	'Maltodextrin phosphorylase (maltohexaose) (No1)'	999.999	0	-18	-1
'AMALT1No1'	'Amylomaltase (maltotriose) (No1)'	0.00406454	0.000451801	-0.954064	-0.888843
'AB6PGHNo3'	'Arbutin 6-phosphate glucohydrolase (No3)'	0.00406454	0.000451801	-0.954064	-0.888843
'AB6PGHNo2'	'Arbutin 6-phosphate glucohydrolase (No2)'	0.00406454	0.000451801	-0.954064	-0.888843
'AB6PGHNo1'	'Arbutin 6-phosphate glucohydrolase (No1)'	0.00406454	0.000451801	-0.954064	-0.888843
'arm_AB6PGH'	'Arbutin 6-phosphate glucohydrolase (arm)'	0.00406454	0.000451801	-0.954064	-0.888843
'DDGALKNo1'	'2-dehydro-3-deoxygalactonokinase (No1)'	0.00406454	0.000451801	-0.954064	-0.888843
'ACMAMUTNo1'	'UDP-N-acetyl-D-mannosaminuronic acid transferase (No1)'	0.00406454	0.000451801	-0.954064	-0.888843
'SERASrNo1'	'(L-seryl)adenylate synthase (No1)'	0.117872	0.0131022	-0.954064	-0.888843
'CATNo2'	'Catalase (No2)'	0.117904	0.0131345	-0.953114	-0.8886
'CATNo1'	'Catalase (No1)'	0.117906	0.0131363	-0.953061	-0.888586
'arm_CAT'	'Catalase (arm)'	0.0294679	0.00327556	-0.954064	-0.888843
'ACNMLNo1'	'N-Acetylneuraminate lyase (No1)'	0.00256243	0.000284831	-0.954064	-0.888843
'AMANKNo1'	'N-acetyl-D-mannosamine kinase (No1)'	0.00261937	0.000291161	-0.954064	-0.888843
'AACPS3No1'	'Acyl-[acyl-carrier-protein] synthetase (n-C16:0) (No1)'	0.00406454	0.000451801	-0.954064	-0.888843
'AACPS2No1'	'Acyl-[acyl-carrier-protein] synthetase (n-C14:1) (No1)'	0.00406454	0.000451801	-0.954064	-0.888843
'OCTDPSNo1'	'Octaprenyl pyrophosphate synthase (No1)'	0.00406454	0.000451801	-0.954064	-0.888843
'ADK1No1'	'Adenylate kinase (No1)'	0.00406454	0.000451801	-0.954064	-0.888843
'ADPTNo1'	'Adenine phosphoribosyltransferase (No1)'	0.00406454	0.000451801	-0.954064	-0.888843
'NTD9No4'	'5''-nucleotidase (GMP) (No4)'	0.117872	0.0131022	-0.954064	-0.888843
'RZ5PPNo1'	'Alpha-ribazole 5-phosphate phosphatase (No1)'	0.117872	0.0131022	-0.954064	-0.888843
'2DGULRyNo1'	'2-dehydro-L-gulonate reductase (NADPH) (No1)'	0.0589359	0.00655112	-0.954064	-0.888843
'DMSOR1No1'	'Dimethyl sulfoxide reductase (Menaquinol 8) (No1)'	0.014734	0.00163778	-0.954064	-0.888843
'arm_DMSOR1'	'Dimethyl sulfoxide reductase (Menaquinol 8) (arm)'	0.014734	0.00163778	-0.954064	-0.888843
'SDPDSNo1'	'Succinyl-diaminopimelate desuccinylase (No1)'	0.014734	0.00163778	-0.954064	-0.888843
'AACPS1No1'	'Acyl-[acyl-carrier-protein] synthetase (n-C14:0) (No1)'	0.014734	0.00163778	-0.954064	-0.888843
'HACD7No1'	'3-hydroxyacyl-CoA dehydrogenase (3-oxohexadecanoyl-CoA) (No1)'	2.23045e-05	2.23006e-05	-7.53555e-05	-0.000173497
'arm_HACD7'	'3-hydroxyacyl-CoA dehydrogenase (3-oxohexadecanoyl-CoA) (arm)'	0.0294679	0.00327556	-0.954064	-0.888843
'EDTXS4No1'	'Endotoxin Synthesis (myristoyl transferase) (No1)'	0.0589359	0.00655112	-0.954064	-0.888843
'EDTXS3No1'	'Endotoxin Synthesis (palmitoleoyl ACP) (No1)'	0.117872	0.0131022	-0.954064	-0.888843
'EDTXS1No1'	'Endotoxin Synthesis (lauroyl transferase) (No1)'	0.0589359	0.00655112	-0.954064	-0.888843
'KAS14No1'	'Beta-ketoacyl-ACP synthase (No1)'	6.81769	3.98886	-0.232788	-0.414925
'arm_KAS14'	'Beta-ketoacyl-ACP synthase (arm)'	6.81769	3.9893	-0.232741	-0.414861
'GLCRALNo1'	'5-dehydro-4-deoxyglucarate aldolase (No1)'	0.0223072	0.00655688	-0.531748	-0.706065
'TARTDNo1'	'L(+)-tartrate dehydratase (No1)'	0.0115692	0.00331013	-0.543459	-0.713885
'GLXCLNo1'	'Glyoxalate carboligase (No1)'	0.0100315	0.00229595	-0.640404	-0.771126
'PGLYCPNo1'	'Phosphoglycolate phosphatase (No1)'	0.0093176	0.0022166	-0.623618	-0.762107
'TAGURrNo1'	'Tagaturonate reductase (No1)'	0.015322	0.00658569	-0.366713	-0.57018
'MANAONo1'	'Mannonate oxidoreductase (No1)'	0.00523875	0.000582322	-0.954064	-0.888843
'TGBPANo2'	'Tagatose-bisphosphate aldolase (No2)'	0.0157352	0.00655273	-0.380449	-0.583561
'TGBPANo1'	'Tagatose-bisphosphate aldolase (No1)'	0.0107156	0.00119111	-0.954064	-0.888843
'GLTPDNo1'	'Galactitol-1-phosphate dehydrogenase (No1)'	0.014734	0.00163778	-0.954064	-0.888843
'PFK_2No1'	'Phosphofructokinase (No1)'	0.000602925	6.70191e-05	-0.954064	-0.888843
'RMPANo1'	'Rhamnulose-1-phosphate aldolase (No1)'	0.00589359	0.000655112	-0.954064	-0.888843
'ALCD19No1'	'Alcohol dehydrogenase (glycerol) (No1)'	0.00523875	0.000582322	-0.954064	-0.888843
'arm_ALCD19'	'Alcohol dehydrogenase (glycerol) (arm)'	0.00240555	0.000267393	-0.954064	-0.888843
'LCARSNo1'	'Lacaldehyde reductase (S-propane-1,2-diol forming) (No1)'	0.00318572	0.000354114	-0.954064	-0.888843
'SADT2No1'	'Sulfate adenyltransferase (No1)'	0.00318572	0.000354114	-0.954064	-0.888843
'GTPCII2No1'	'GTP cyclohydrolase II (25drapp) (No1)'	0.00318572	0.000354114	-0.954064	-0.888843
'PYDXKNo2'	'Pyridoxal kinase (No2)'	0.00245566	0.000272963	-0.954064	-0.888843
'PYDXKNo1'	'Pyridoxal kinase (No1)'	0.00245566	0.000272963	-0.954064	-0.888843
'arm_PYDXK'	'Pyridoxal kinase (arm)'	0.00240555	0.000267393	-0.954064	-0.888843
'GOFUCRNo1'	'GDP-4-oxo-L-fucose reductase (No1)'	0.0294679	0.00327556	-0.954064	-0.888843
'CITLNo1'	'Citrate lyase (No1)'	0.0294679	0.00327556	-0.954064	-0.888843
'DHCINDNo1'	'2,3-dihydroxycinnamate dehydrogenase (No1)'	0.00294679	0.000327556	-0.954064	-0.888843
'DHPPDNo1'	'2,3-dihydroxyphenylpropionate dehydrogenase (No1)'	0.00129529	0.000143981	-0.954064	-0.888843
'CINNDONo1'	'Cinnamate dioxygenase (No1)'	0.00128122	0.000142416	-0.954064	-0.888843
'arm_G3PT'	'Glycerol-3-phosphatase (arm)'	0.00294679	0.000327556	-0.954064	-0.888843
'PPCNo1'	'Phosphoenolpyruvate carboxylase (No1)'	0.00294679	0.000327556	-0.954064	-0.888843
'XYLI1No1'	'Xylose isomerase (No1)'	0.014734	0.00163778	-0.954064	-0.888843
'TRE6PHNo1'	'Trehalose-6-phosphate hydrolase (No1)'	0.00523875	0.000582322	-0.954064	-0.888843
'LACZNo1'	'B-galactosidase (No1)'	0.00523875	0.000582322	-0.954064	-0.888843
'HCYSMTNo1'	'Homocysteine S-methyltransferase (No1)'	0.0130969	0.0014558	-0.954064	-0.888843
'GLYCLNo1'	'Glycine Cleavage System (No1)'	0.0130969	0.0014558	-0.954064	-0.888843
'ICLNo1'	'Isocitrate lyase (No1)'	0.00589359	0.000655112	-0.954064	-0.888843
'PMANMNo1'	'Phosphomannomutase (No1)'	0.00900655	0.00109117	-0.916665	-0.878847
'XYLI2No1'	'Xylose isomerase (No1)'	0.00900655	0.00109117	-0.916665	-0.878847
'DDGLKNo1'	'2-dehydro-3-deoxygluconokinase (No1)'	0.000854143	9.49437e-05	-0.954064	-0.888843
'MECDPSNo1'	'2-C-methyl-D-erythritol 2,4-cyclodiphosphate synthase (No1)'	0.00129529	0.000143981	-0.954064	-0.888843
'CDPMEKNo1'	'4-(cytidine 5''-diphospho)-2-C-methyl-D-erythritol kinase (No1)'	0.00129529	0.000143981	-0.954064	-0.888843
'DXPSNo1'	'1-deoxy-D-xylulose 5-phosphate synthase (No1)'	0.00130969	0.00014558	-0.954064	-0.888843
'UGLTNo1'	'UDPglucose--hexose-1-phosphate uridylyltransferase (No1)'	0.00900655	0.00108112	-0.920684	-0.879963
'ECOAH3No2'	'3-hydroxyacyl-CoA dehydratase (3-hydroxyoctanoyl-CoA) (No2)'	0.00900655	0.00109117	-0.916665	-0.878847
'ECOAH3No1'	'3-hydroxyacyl-CoA dehydratase (3-hydroxyoctanoyl-CoA) (No1)'	0.014734	0.00163778	-0.954064	-0.888843
'arm_ECOAH3'	'3-hydroxyacyl-CoA dehydratase (3-hydroxyoctanoyl-CoA) (arm)'	0.00406454	0.000451801	-0.954064	-0.888843
'ECOAH2No2'	'3-hydroxyacyl-CoA dehydratase (3-hydroxyhexanoyl-CoA) (No2)'	0.00406454	0.000451801	-0.954064	-0.888843
'ECOAH2No1'	'3-hydroxyacyl-CoA dehydratase (3-hydroxyhexanoyl-CoA) (No1)'	0.00406454	0.000451801	-0.954064	-0.888843
'arm_ECOAH2'	'3-hydroxyacyl-CoA dehydratase (3-hydroxyhexanoyl-CoA) (arm)'	0.0157326	0.00327556	-0.681515	-0.791798
'ECOAH1No2'	'3-hydroxyacyl-CoA dehydratase (3-hydroxybutanoyl-CoA) (No2)'	0.0134637	0.00163778	-0.914908	-0.878356
'ECOAH1No1'	'3-hydroxyacyl-CoA dehydratase (3-hydroxybutanoyl-CoA) (No1)'	0.0112582	0.00163778	-0.837213	-0.854525
'arm_ECOAH1'	'3-hydroxyacyl-CoA dehydratase (3-hydroxybutanoyl-CoA) (arm)'	0.00900655	0.00109117	-0.916665	-0.878847
'HACD6No2'	'3-hydroxyacyl-CoA dehydrogenase (3-oxotetradecanoyl-CoA) (No2)'	0.0112582	0.00163778	-0.837213	-0.854525
'HACD6No1'	'3-hydroxyacyl-CoA dehydrogenase (3-oxotetradecanoyl-CoA) (No1)'	0.00900655	0.00109117	-0.916665	-0.878847
'arm_HACD6'	'3-hydroxyacyl-CoA dehydrogenase (3-oxotetradecanoyl-CoA) (arm)'	0.0150109	0.00327556	-0.661122	-0.781788
'PDXPPNo1'	'Pyridoxine 5-phosphate phosphatase (No1)'	0.0112582	0.00163778	-0.837213	-0.854525
'PYDXPPNo4'	'Pyridoxal 5-phosphate phosphatase (No4)'	0.00900655	0.00109117	-0.916665	-0.878847
'PYDXPPNo3'	'Pyridoxal 5-phosphate phosphatase (No3)'	0.00736699	0.00081889	-0.954064	-0.888843
'PYDXPPNo2'	'Pyridoxal 5-phosphate phosphatase (No2)'	0.0134637	0.00163778	-0.914908	-0.878356
'PYDXPPNo1'	'Pyridoxal 5-phosphate phosphatase (No1)'	0.0157326	0.00327556	-0.681515	-0.791798
'arm_PYDXPP'	'Pyridoxal 5-phosphate phosphatase (arm)'	0.0150109	0.00327556	-0.661122	-0.781788
'LGTHLNo1'	'Lactoylglutathione lyase (No1)'	0.0112582	0.00163778	-0.837213	-0.854525
'NTD6No3'	'5''-nucleotidase (dAMP) (No3)'	0.00294679	0.000327556	-0.954064	-0.888843
'NTD6No2'	'5''-nucleotidase (dAMP) (No2)'	0.00589359	0.000655112	-0.954064	-0.888843
'NTD6No1'	'5''-nucleotidase (dAMP) (No1)'	0.00318572	0.000354114	-0.954064	-0.888843
'arm_NTD6'	'5''-nucleotidase (dAMP) (arm)'	0.00318572	0.000354114	-0.954064	-0.888843
'NTD5No4'	'5''-nucleotidase (dTMP) (No4)'	0.00693363	0.00077072	-0.954064	-0.888843
'NTD2No2'	'5''-nucleotidase (UMP) (No2)'	0.00589359	0.000655112	-0.954064	-0.888843
'NTD2No1'	'5''-nucleotidase (UMP) (No1)'	0.00589359	0.000655112	-0.954064	-0.888843
'arm_NTD2'	'5''-nucleotidase (UMP) (arm)'	0.00561294	0.000623916	-0.954064	-0.888843
'RBP4ENo3'	'L-ribulose-phosphate 4-epimerase (No3)'	0.0130969	0.0014558	-0.954064	-0.888843
'RBP4ENo2'	'L-ribulose-phosphate 4-epimerase (No2)'	0.0130969	0.0014558	-0.954064	-0.888843
'RBP4ENo1'	'L-ribulose-phosphate 4-epimerase (No1)'	0.0130969	0.0014558	-0.954064	-0.888843
'arm_RBP4E'	'L-ribulose-phosphate 4-epimerase (arm)'	0.00294679	0.000327556	-0.954064	-0.888843
'RBK_L1No1'	'L-ribulokinase (L-ribulose) (No1)'	0.00589359	0.000655112	-0.954064	-0.888843
'ICHORTNo1'	'Isochorismatase (No1)'	0.00406454	0.000451801	-0.954064	-0.888843
'DHBDNo1'	'2,3-dihydro-2,3-dihydroxybenzoate dehydrogenase (No1)'	0.00406454	0.000451801	-0.954064	-0.888843
'SUCBZSNo1'	'O-succinylbenzoate-CoA synthase (No1)'	0.00589359	0.000655112	-0.954064	-0.888843
'ICHORS_copy2No1'	' (No1)'	0.00589359	0.000655112	-0.954064	-0.888843
'NADKNo1'	'NAD kinase (No1)'	0.00589359	0.000655112	-0.954064	-0.888843
'ACCOACNo1'	'Acetyl-CoA carboxylase (No1)'	0.00589359	0.000655112	-0.954064	-0.888843
'KARA2No1'	'Ketol-acid reductoisomerase (2-Acetolactate) (No1)'	0.00589359	0.000655112	-0.954064	-0.888843
'KARA1No1'	'Ketol-acid reductoisomerase (2,3-dihydroxy-3-methylbutanoate) (No1)'	0.00294679	0.000327556	-0.954064	-0.888843
'THRDNo2'	'L-threonine dehydrogenase (No2)'	0.00294679	0.000327556	-0.954064	-0.888843
'THRDNo1'	'L-threonine dehydrogenase (No1)'	0.00294679	0.000327556	-0.954064	-0.888843
'arm_THRD'	'L-threonine dehydrogenase (arm)'	0.00589359	0.000655112	-0.954064	-0.888843
'SERD_LNo5'	'L-serine deaminase (No5)'	0.00589359	0.000655112	-0.954064	-0.888843
'SERD_LNo3'	'L-serine deaminase (No3)'	0.00406454	0.000451801	-0.954064	-0.888843
'SERD_LNo2'	'L-serine deaminase (No2)'	0.00406454	0.000451801	-0.954064	-0.888843
'SERD_LNo1'	'L-serine deaminase (No1)'	0.00406454	0.000451801	-0.954064	-0.888843
'arm_SERD_L'	'L-serine deaminase (arm)'	0.00406454	0.000451801	-0.954064	-0.888843
'ASPTNo1'	'L-aspartase (No1)'	0.00589359	0.000655112	-0.954064	-0.888843
'SSALxNo1'	'Succinate-semialdehyde dehydrogenase (NAD) (No1)'	0.00126744	0.000140884	-0.954064	-0.888843
'ABTANo2'	'4-aminobutyrate transaminase (No2)'	0.00130969	0.00014558	-0.954064	-0.888843
'ABTANo1'	'4-aminobutyrate transaminase (No1)'	0.00900655	0.00109117	-0.916665	-0.878847
'arm_ABTA'	'4-aminobutyrate transaminase (arm)'	0.00900655	0.00109117	-0.916665	-0.878847
'INSKNo1'	'Insosine kinase (No1)'	0.0157326	0.00327556	-0.681515	-0.791798
'ADK4No1'	'Adentylate kinase (ITP) (No1)'	0.00900655	0.00109117	-0.916665	-0.878847
'DHORD2No1'	'Dihydoorotic acid dehydrogenase (quinone8) (No1)'	0.00589359	0.000655112	-0.954064	-0.888843
'GHMT2rNo1'	'Glycine hydroxymethyltransferase, reversible (No1)'	0.00900655	0.00109117	-0.916665	-0.878847
'OHPHMNo1'	'2-octaprenyl-6-hydroxyphenol methylase (No1)'	0.000939217	0.0001044	-0.954064	-0.888843
'OPHBDCNo1'	'Octaprenyl-hydroxybenzoate decarboxylase (No1)'	0.00128122	0.000142416	-0.954064	-0.888843
'DXPRIiNo1'	'1-deoxy-D-xylulose reductoisomerase (No1)'	0.000854143	9.49437e-05	-0.954064	-0.888843
'HEX7No1'	'Hexokinase (D-fructose:ATP) (No1)'	0.00128122	0.000142416	-0.954064	-0.888843
'PTPATiNo1'	'Pantetheine-phosphate adenylyltransferase (No1)'	0.00406454	0.000451801	-0.954064	-0.888843
'HPPK2No1'	'6-hydroxymethyl-dihydropterin pyrophosphokinase (No1)'	0.0294679	0.00327556	-0.954064	-0.888843
'HACD5No2'	'3-hydroxyacyl-CoA dehydrogenase (3-oxododecanoyl-CoA) (No2)'	0.0294679	0.00327556	-0.954064	-0.888843
'HACD5No1'	'3-hydroxyacyl-CoA dehydrogenase (3-oxododecanoyl-CoA) (No1)'	0.0294679	0.00327556	-0.954064	-0.888843
'arm_HACD5'	'3-hydroxyacyl-CoA dehydrogenase (3-oxododecanoyl-CoA) (arm)'	0.0294679	0.00327556	-0.954064	-0.888843
'ICHORS_copy1No1'	' (No1)'	0.00294679	0.000327556	-0.954064	-0.888843
'DMQMTNo1'	'3-Dimethylubiquinonol 3-methyltransferase (No1)'	0.00294679	0.000327556	-0.954064	-0.888843
'MACPDNo1'	'Malonyl-ACP decarboxylase (No1)'	5.18422e-05	5.7626e-06	-0.954064	-0.888843
'ALTRHNo1'	'Altronate hydrolase (No1)'	0.00589359	0.000655112	-0.954064	-0.888843
'MNNHNo1'	'D-mannonate hydrolyase (No1)'	0.00589359	0.000655112	-0.954064	-0.888843
'OAADCNo1'	'Oxaloacetate decarboxylase (No1)'	0.00589359	0.000655112	-0.954064	-0.888843
'KDOCT2No1'	'3-deoxy-manno-octulosonate cytidylyltransferase (No1)'	0.00589359	0.000655112	-0.954064	-0.888843
'G1SATNo1'	'Glutamate-1-semialdehyde aminotransferase (No1)'	0.00128122	0.000142416	-0.954064	-0.888843
'SPMSNo1'	'Spermidine synthase (No1)'	0.0130969	0.0014558	-0.954064	-0.888843
'AGPRNo1'	'N-acetyl-g-glutamyl-phosphate reductase (No1)'	0.0130969	0.0014558	-0.954064	-0.888843
'ARGSSNo1'	'Argininosuccinate synthase (No1)'	0.0130969	0.0014558	-0.954064	-0.888843
'ARGDCNo1'	'Arginine decarboxylase (No1)'	0.00561294	0.000623916	-0.954064	-0.888843
'AGMTNo1'	'Agmatinase (No1)'	0.00561294	0.000623916	-0.954064	-0.888843
'ADMDCNo1'	'Adenosylmethionine decarboxylase (No1)'	0.00561294	0.000623916	-0.954064	-0.888843
'HEMEOSNo1'	'Heme O synthase (No1)'	0.00589359	0.000655112	-0.954064	-0.888843
'GLCPNo2'	'Glycogen phosphorylase (No2)'	0.00589359	0.000655112	-0.954064	-0.888843
'GLCPNo1'	'Glycogen phosphorylase (No1)'	0.00589359	0.000655112	-0.954064	-0.888843
'arm_GLCP'	'Glycogen phosphorylase (arm)'	0.00589359	0.000655112	-0.954064	-0.888843
'GLCS1No1'	'Glycogen synthase (ADPGlc) (No1)'	0.00294679	0.000327556	-0.954064	-0.888843
'GLUTRRNo1'	'Glutamyl-tRNA reductase (No1)'	0.00589359	0.000655112	-0.954064	-0.888843
'OHPBATNo1'	'O-Phospho-4-hydroxy-L-threonine:2-oxoglutarate aminotransferase (No1)'	0.00589359	0.000655112	-0.954064	-0.888843
'PYAM5PONo1'	'Pyridoxamine 5''-phosphate oxidase (No1)'	0.00589359	0.000655112	-0.954064	-0.888843
'FUMNo3'	'Fumarase (No3)'	0.014734	0.00163778	-0.954064	-0.888843
'FUMNo2'	'Fumarase (No2)'	0.00589359	0.00127903	-0.6635	-0.78298
'FUMNo1'	'Fumarase (No1)'	0.00589359	0.00127903	-0.6635	-0.78298
'arm_FUM'	'Fumarase (arm)'	0.00589359	0.00127903	-0.6635	-0.78298
'MDHNo1'	'Malate dehydrogenase (No1)'	0.00589359	0.00127903	-0.6635	-0.78298
'NADH10No4'	'NADH dehydrogenase (menaquinone-8 & 0 protons) (No4)'	0.00523875	0.000582322	-0.954064	-0.888843
'NADH10No3'	'NADH dehydrogenase (menaquinone-8 & 0 protons) (No3)'	0.00589359	0.000655112	-0.954064	-0.888843
'NADH10No2'	'NADH dehydrogenase (menaquinone-8 & 0 protons) (No2)'	0.0157326	0.00327556	-0.681515	-0.791798
'NADH10No1'	'NADH dehydrogenase (menaquinone-8 & 0 protons) (No1)'	0.0134637	0.00163778	-0.914908	-0.878356
'arm_NADH10'	'NADH dehydrogenase (menaquinone-8 & 0 protons) (arm)'	0.0134637	0.00163778	-0.914908	-0.878356
'NADH9No4'	'NADH dehydrogenase (demethylmenaquinone-8 & 0 protons) (No4)'	0.00128122	0.000142416	-0.954064	-0.888843
'NADH9No3'	'NADH dehydrogenase (demethylmenaquinone-8 & 0 protons) (No3)'	0.00589359	0.000655112	-0.954064	-0.888843
'NADH9No2'	'NADH dehydrogenase (demethylmenaquinone-8 & 0 protons) (No2)'	0.00406454	0.000451801	-0.954064	-0.888843
'arm_NADH9'	'NADH dehydrogenase (demethylmenaquinone-8 & 0 protons) (arm)'	0.00130969	0.00014558	-0.954064	-0.888843
'G3PD7No1'	'Glycerol-3-phosphate dehydrogenase (demethylmenaquinone-8) (No1)'	0.00129529	0.000143981	-0.954064	-0.888843
'IPPMIaNo1'	'3-isopropylmalate dehydratase (No1)'	0.00589359	0.00127903	-0.6635	-0.78298
'DHAD1No1'	'Dihydroxy-acid dehydratase (2,3-dihydroxy-3-methylbutanoate) (No1)'	0.00589359	0.00127903	-0.6635	-0.78298
'LYSAMNo1'	'Lysine 2,3-aminomutase (No1)'	0.00589359	0.000655112	-0.954064	-0.888843
'PUNP3No1'	'Purine-nucleoside phosphorylase (Guanosine) (No1)'	0.00589359	0.000655112	-0.954064	-0.888843
'arm_PUNP3'	'Purine-nucleoside phosphorylase (Guanosine) (arm)'	0.00589359	0.000655112	-0.954064	-0.888843
'PUNP2No1'	'Purine-nucleoside phosphorylase (Deoxyadenosine) (No1)'	0.00561294	0.000623916	-0.954064	-0.888843
'PUNP1No1'	'Purine-nucleoside phosphorylase (Adenosine) (No1)'	0.00561294	0.000623916	-0.954064	-0.888843
'DHQTiNo1'	'3-dehydroquinate dehydratase, irreversible (No1)'	0.0130969	0.0014558	-0.954064	-0.888843
'EDDNo1'	'6-phosphogluconate dehydratase (No1)'	0.0130969	0.0014558	-0.954064	-0.888843
'FTHFDNo1'	'Formyltetrahydrofolate deformylase (No1)'	0.0130969	0.0014558	-0.954064	-0.888843
'PPCDCNo1'	'Phosphopantothenoylcysteine decarboxylase (No1)'	0.00129529	0.000143981	-0.954064	-0.888843
'TMDK1No1'	'Thymidine kinase (ATP:thymidine) (No1)'	0.043617	0.00721884	-0.781189	-0.834495
'TMDSNo1'	'Thymidylate synthase (No1)'	0.00245566	0.000272963	-0.954064	-0.888843
'RNDR4No2'	'Ribonucleoside-diphosphate reductase (UDP) (No2)'	0.00240555	0.000267393	-0.954064	-0.888843
'RNDR4No1'	'Ribonucleoside-diphosphate reductase (UDP) (No1)'	0.00240555	0.000267393	-0.954064	-0.888843
'arm_RNDR4'	'Ribonucleoside-diphosphate reductase (UDP) (arm)'	0.00318572	0.000354114	-0.954064	-0.888843
'RNDR3No2'	'Ribonucleoside-diphosphate reductase (CDP) (No2)'	0.00318572	0.000354114	-0.954064	-0.888843
'RNDR3No1'	'Ribonucleoside-diphosphate reductase (CDP) (No1)'	0.00589359	0.000655112	-0.954064	-0.888843
'arm_RNDR3'	'Ribonucleoside-diphosphate reductase (CDP) (arm)'	0.014734	0.00163778	-0.954064	-0.888843
'RNDR1No2'	'Ribonucleoside-diphosphate reductase (ADP) (No2)'	0.014734	0.00163778	-0.954064	-0.888843
'RNDR1No1'	'Ribonucleoside-diphosphate reductase (ADP) (No1)'	0.00294679	0.000327556	-0.954064	-0.888843
'arm_RNDR1'	'Ribonucleoside-diphosphate reductase (ADP) (arm)'	0.00736699	0.00081889	-0.954064	-0.888843
'PUNP7No1'	'Purine-nucleoside phosphorylase (Xanthosine) (No1)'	0.00736699	0.00081889	-0.954064	-0.888843
'PUNP6No2'	'Purine-nucleoside phosphorylase (Deoxyinosine) (No2)'	0.0176073	0.00327556	-0.730407	-0.813966
'PUNP6No1'	'Purine-nucleoside phosphorylase (Deoxyinosine) (No1)'	0.00736699	0.00081889	-0.954064	-0.888843
'arm_PUNP6'	'Purine-nucleoside phosphorylase (Deoxyinosine) (arm)'	0.0112582	0.00163778	-0.837213	-0.854525
'PUNP5No2'	'Purine-nucleoside phosphorylase (Inosine) (No2)'	0.0157326	0.00327556	-0.681515	-0.791798
'PUNP5No1'	'Purine-nucleoside phosphorylase (Inosine) (No1)'	0.00129529	0.000143981	-0.954064	-0.888843
'arm_PUNP5'	'Purine-nucleoside phosphorylase (Inosine) (arm)'	0.014734	0.00163778	-0.954064	-0.888843
'ADSL2rNo1'	'Adenylosuccinate lyase (No1)'	0.00406454	0.000451801	-0.954064	-0.888843
'arm_IPMD'	'3-isopropylmalate dehydrogenase (arm)'	0.0176073	0.00327556	-0.730407	-0.813966
'NTPTP2No1'	'Nucleoside triphosphate tripolyhydrolase (No1)'	0.00523875	0.000582322	-0.954064	-0.888843
'NTPTP1No1'	'Nucleoside triphosphate tripolyhydrolase (No1)'	0.00900655	0.00108112	-0.920684	-0.879963
'NTPP2No2'	'Nucleoside triphosphate pyrophosphorylase (gtp) (No2)'	0.0134637	0.00163778	-0.914908	-0.878356
'NTPP2No1'	'Nucleoside triphosphate pyrophosphorylase (gtp) (No1)'	0.00128122	0.000142416	-0.954064	-0.888843
'arm_NTPP2'	'Nucleoside triphosphate pyrophosphorylase (gtp) (arm)'	0.000854143	9.49437e-05	-0.954064	-0.888843
'arm_NTPP1'	'Nucleoside triphosphate pyrophosphorylase (dgtp) (arm)'	0.00693363	0.00077072	-0.954064	-0.888843
'TDSKNo1'	'Tetraacyldisaccharide 4''kinase (No1)'	0.00736699	0.00081889	-0.954064	-0.888843
'LPADSSNo1'	'Lipid A disaccaride synthase (No1)'	0.00736699	0.00081889	-0.954064	-0.888843
'USHDNo1'	'UDP-sugar hydrolase (No1)'	0.00523875	0.000582322	-0.954064	-0.888843
'UDCPDPSNo1'	'Undecaprenyl diphosphate synthase (No1)'	0.0150109	0.00327556	-0.661122	-0.781788
'MOATNo1'	'3-deoxy-D-manno-octulosonic acid transferase (No1)'	0.00900655	0.00108112	-0.920684	-0.879963
'ACKrNo3'	'Acetate kinase (No3)'	0.0260555	0.00327556	-0.900614	-0.874285
'ACKrNo2'	'Acetate kinase (No2)'	0.00245566	0.000272963	-0.954064	-0.888843
'ACKrNo1'	'Acetate kinase (No1)'	0.00245566	0.000272963	-0.954064	-0.888843
'arm_ACKr'	'Acetate kinase (arm)'	0.0176073	0.00327556	-0.730407	-0.813966
'PTArNo2'	'Phosphotransacetylase (No2)'	0.00245566	0.000272963	-0.954064	-0.888843
'PTArNo1'	'Phosphotransacetylase (No1)'	0.00240555	0.000267393	-0.954064	-0.888843
'arm_PTAr'	'Phosphotransacetylase (arm)'	0.00240555	0.000267393	-0.954064	-0.888843
'FRD2No1'	'Fumarate reductase (No1)'	0.0294679	0.00327556	-0.954064	-0.888843
'PFLNo4'	'Pyruvate formate lyase (No4)'	0.043617	0.00721884	-0.781189	-0.834495
'PFLNo2'	'Pyruvate formate lyase (No2)'	0.00245566	0.000272963	-0.954064	-0.888843
'PFLNo1'	'Pyruvate formate lyase (No1)'	0.00245566	0.000272963	-0.954064	-0.888843
'arm_PFL'	'Pyruvate formate lyase (arm)'	0.00245566	0.000272963	-0.954064	-0.888843
'G1PPNo3'	'Glucose-1-phosphatase (No3)'	0.00182843	0.000209636	-0.940612	-0.885346
'arm_G1PP'	'Glucose-1-phosphatase (arm)'	0.00318572	0.000354114	-0.954064	-0.888843
'DHAD2No1'	'Dihydroxy-acid dehydratase (2,3-dihydroxy-3-methylpentanoate) (No1)'	0.00318572	0.000354114	-0.954064	-0.888843
'RBFSaNo1'	'Riboflavin synthase (No1)'	0.00240555	0.000267393	-0.954064	-0.888843
'ORPTNo1'	'Orotate phosphoribosyltransferase (No1)'	0.00240555	0.000267393	-0.954064	-0.888843
'VALTANo1'	'Valine transaminase (No1)'	0.00245566	0.000272963	-0.954064	-0.888843
'ILETANo1'	'Isoleucine transaminase (No1)'	0.00245566	0.000272963	-0.954064	-0.888843
'PMDPHTNo2'	'Pyrimidine phosphatase (No2)'	0.00245566	0.000272963	-0.954064	-0.888843
'PMDPHTNo1'	'Pyrimidine phosphatase (No1)'	0.00240555	0.000267393	-0.954064	-0.888843
'arm_PMDPHT'	'Pyrimidine phosphatase (arm)'	0.00240555	0.000267393	-0.954064	-0.888843
'NDP3No2'	'Nucleoside diphosphatase GDP (No2)'	0.00240555	0.000267393	-0.954064	-0.888843
'NDP3No1'	'Nucleoside diphosphatase GDP (No1)'	0.00182843	0.000209636	-0.940612	-0.885346
'arm_NDP3'	'Nucleoside diphosphatase GDP (arm)'	0.00182843	0.000209636	-0.940612	-0.885346
'TRPAS2No1'	'Tryptophanase (L-tryptophan) (No1)'	0.00240555	0.000267393	-0.954064	-0.888843
'CYSDSNo2'	'Cysteine Desulfhydrase (No2)'	6.8511	4.01439	-0.232141	-0.414052
'CYSDSNo1'	'Cysteine Desulfhydrase (No1)'	250	250	0	0
'arm_CYSDS'	'Cysteine Desulfhydrase (arm)'	1000	2000	0.30103	1
'PTRCTANo1'	'Putrescine Transaminase (No1)'	1.0411e-07	6.5832e-08	-0.199057	-0.367672
'arm_DURIPP'	'Deoxyuridine phosphorylase (arm)'	0.00318572	0.000354114	-0.954064	-0.888843
'PYNP2rNo1'	'Pyrimidine-nucleoside phosphorylase (uracil) (No1)'	0.00318572	0.000354114	-0.954064	-0.888843
'NDPK8No2'	'Nucleoside-diphosphate kinase (ATP:dADP) (No2)'	0.00318572	0.000354114	-0.954064	-0.888843
'NDPK8No1'	'Nucleoside-diphosphate kinase (ATP:dADP) (No1)'	2.37326e-05	2.63803e-06	-0.954064	-0.888843
'arm_NDPK8'	'Nucleoside-diphosphate kinase (ATP:dADP) (arm)'	0.00294679	0.000327556	-0.954064	-0.888843
'NDPK6No2'	'Nucleoside-diphosphate kinase (ATP:dUDP) (No2)'	0.00294679	0.000327556	-0.954064	-0.888843
'NDPK6No1'	'Nucleoside-diphosphate kinase (ATP:dUDP) (No1)'	0.00294679	0.000327556	-0.954064	-0.888843
'arm_NDPK6'	'Nucleoside-diphosphate kinase (ATP:dUDP) (arm)'	0.00294679	0.000327556	-0.954064	-0.888843
'HMPK1No2'	'Hydroxymethylpyrimidine kinase (ATP) (No2)'	0.00294679	0.000327556	-0.954064	-0.888843
'HMPK1No1'	'Hydroxymethylpyrimidine kinase (ATP) (No1)'	0.00294679	0.000327556	-0.954064	-0.888843
'arm_HMPK1'	'Hydroxymethylpyrimidine kinase (ATP) (arm)'	0.0294679	0.00327556	-0.954064	-0.888843
'NMNATNo2'	'Nicotinamide-nucleotide adenylyltransferase (No2)'	0.00589359	0.00127903	-0.6635	-0.78298
'NMNATNo1'	'Nicotinamide-nucleotide adenylyltransferase (No1)'	0.00406454	0.000451801	-0.954064	-0.888843
'arm_NMNAT'	'Nicotinamide-nucleotide adenylyltransferase (arm)'	0.00523875	0.000582322	-0.954064	-0.888843
'NADDPNo2'	'NAD diphosphatase (No2)'	0.0279005	0.00467211	-0.776099	-0.832544
'NADDPNo1'	'NAD diphosphatase (No1)'	0.00523875	0.000582322	-0.954064	-0.888843
'arm_NADDP'	'NAD diphosphatase (arm)'	0.0150109	0.00327556	-0.661122	-0.781788
'FMNATNo1'	'FMN adenylyltransferase (No1)'	0.00900655	0.00109117	-0.916665	-0.878847
'RMINo1'	'L-rhamnose isomerase (No1)'	0.0150109	0.00327556	-0.661122	-0.781788
'ALDD2yNo5'	'Aldehyde dehydrogenase (acetaldehyde, NADP) (No5)'	0.0213976	0.00491334	-0.638988	-0.770379
'ALDD2yNo4'	'Aldehyde dehydrogenase (acetaldehyde, NADP) (No4)'	0.00182843	0.000209636	-0.940612	-0.885346
'ALDD2yNo1'	'Aldehyde dehydrogenase (acetaldehyde, NADP) (No1)'	0.000516237	8.15059e-05	-0.80166	-0.842115
'ALCD2xNo1'	'Alcohol dehydrogenase (ethanol) (No1)'	0.00589359	0.000655112	-0.954064	-0.888843
'arm_ALCD2x'	'Alcohol dehydrogenase (ethanol) (arm)'	0.014734	0.00163778	-0.954064	-0.888843
'G6PDANo1'	'Glucosamine-6-phosphate deaminase (No1)'	0.014734	0.00163778	-0.954064	-0.888843
'TKT1No2'	'Transketolase (No2)'	0.014734	0.00163778	-0.954064	-0.888843
'TKT1No1'	'Transketolase (No1)'	0.014734	0.00163778	-0.954064	-0.888843
'arm_TKT1'	'Transketolase (arm)'	0.014734	0.00163778	-0.954064	-0.888843
'arm_TALA'	'Transaldolase (arm)'	0.00523875	0.000582322	-0.954064	-0.888843
'RPENo1'	'Ribulose 5-phosphate 3-epimerase (No1)'	0.00523875	0.000582322	-0.954064	-0.888843
'PGLNo1'	'6-phosphogluconolactonase (No1)'	0.00736699	0.00081889	-0.954064	-0.888843
'EDANo1'	'2-dehydro-3-deoxy-phosphogluconate aldolase (No1)'	0.0593263	0.00694148	-0.931795	-0.882995
'PGINo1'	'Glucose-6-phosphate isomerase (No1)'	0.00406454	0.000451801	-0.954064	-0.888843
'PPSNo1'	'Phosphoenolpyruvate synthase (No1)'	0.00406454	0.000451801	-0.954064	-0.888843
'MGSANo1'	'Methylglyoxal synthase (No1)'	2.23045e-05	2.23006e-05	-7.53553e-05	-0.000173497
'FBANo2'	'Fructose-bisphosphate aldolase (No2)'	2.23045e-05	2.23005e-05	-7.64541e-05	-0.000176027
'FBANo1'	'Fructose-bisphosphate aldolase (No1)'	0.000197704	4.17951e-05	-0.674891	-0.788598
'arm_FBA'	'Fructose-bisphosphate aldolase (arm)'	0.0107156	0.00119111	-0.954064	-0.888843
'ECOAH6No2'	'3-hydroxyacyl-CoA dehydratase (3-hydroxytetradecanoyl-CoA) (No2)'	2.23045e-05	2.2298e-05	-0.000124839	-0.000287412
'CHORSNo1'	'Chorismate synthase (No1)'	3.89159e-07	2.46076e-07	-0.199057	-0.367671
'CHORMNo2'	'Chorismate mutase (No2)'	0.0351474	0.0333061	-0.0233703	-0.0523899
'ACLSNo1'	'Acetolactate synthase (No1)'	0.0589359	0.00655112	-0.954064	-0.888843
'arm_ACLS'	'Acetolactate synthase (arm)'	0.00130969	0.00014558	-0.954064	-0.888843
'ACHBSNo2'	'2-aceto-2-hydroxybutanoate synthase (No2)'	0.000854143	9.49437e-05	-0.954064	-0.888843
'ACHBSNo1'	'2-aceto-2-hydroxybutanoate synthase (No1)'	0.00129529	0.000143981	-0.954064	-0.888843
'arm_ACHBS'	'2-aceto-2-hydroxybutanoate synthase (arm)'	0.000854143	9.49437e-05	-0.954064	-0.888843
'IPPMIbNo1'	'2-isopropylmalate hydratase (No1)'	0.00130969	0.00014558	-0.954064	-0.888843
'A5PISONo1'	'Arabinose-5-phosphate isomerase (No1)'	9.49303e-05	1.05521e-05	-0.954064	-0.888843
'arm_A5PISO'	'Arabinose-5-phosphate isomerase (arm)'	0.00215195	0.000254412	-0.927295	-0.881776
'arm_PYK'	'Pyruvate kinase (arm)'	0.0294679	0.00115983	-1.40496	-0.960641
'FBPNo1'	'Fructose-bisphosphatase (No1)'	0.00128122	0.000142416	-0.954064	-0.888843
'ASPTANo1'	'Aspartate transaminase (No1)'	0.118588	0.0131818	-0.954064	-0.888843
'RBKNo1'	'Ribokinase (No1)'	0.00477912	0.00113932	-0.6227	-0.761603
'XYLKNo2'	'Xylulokinase (No2)'	0.00955823	0.00113932	-0.92373	-0.880802
'XYLKNo1'	'Xylulokinase (No1)'	2.37326e-05	2.63803e-06	-0.954064	-0.888843
'ALATA_LNo1'	'L-alanine transaminase (No1)'	0.0120936	0.00154355	-0.894038	-0.872367
'ALARNo2'	'Alanine racemase (No2)'	1.0411e-07	6.5832e-08	-0.199057	-0.367672
'arm_ALAR'	'Alanine racemase (arm)'	0.00182843	0.000209636	-0.940612	-0.885346
'PPANo2'	'Inorganic diphosphatase (No2)'	0.00519276	0.000637551	-0.910883	-0.877223
'ACALDNo2'	'Acetaldehyde dehydrogenase (acetylating) (No2)'	2.23045e-05	4.45984e-05	0.300927	0.999527
'ACALDNo1'	'Acetaldehyde dehydrogenase (acetylating) (No1)'	0.00477912	0.000569662	-0.92373	-0.880802
'ICDHyrNo1'	'Isocitrate dehydrogenase (NADP) (No1)'	0.0027412	0.000304703	-0.954064	-0.888843
'CSNo1'	'Citrate synthase (No1)'	0.0147716	0.00167541	-0.945307	-0.886579
'arm_HXPRT'	'Hypoxanthine phosphoribosyltransferase (Hypoxanthine) (arm)'	0.00955823	0.00113932	-0.92373	-0.880802
'XPPTNo1'	'Xanthine phosphoribosyltransferase (No1)'	1000.03	37.3436	-1.4278	-0.962658
'CYTDK2No1'	'Cytidine kinase (GTP) (No1)'	0.0130969	0.0014558	-0.954064	-0.888843
'CYTDK1No1'	'ATP:cytidine 5''-phosphotransferase (No1)'	0.0130969	0.0014558	-0.954064	-0.888843
'URIK2No1'	'Uridine kinase (GTP:Uridine) (No1)'	0.0130969	0.0014558	-0.954064	-0.888843
'URIK1No1'	'Uridine kinase ATPUridine (No1)'	0.0130969	0.0014558	-0.954064	-0.888843
'TMPPPNo1'	'Thiamine-phosphate diphosphorylase (No1)'	0.0130969	0.0014558	-0.954064	-0.888843
'GLUTRSNo1'	'Glutamyl-tRNA synthetase (No1)'	0.0130969	0.0014558	-0.954064	-0.888843
'ECOAH4No2'	'3-hydroxyacyl-CoA dehydratase (3-hydroxydecanoyl-CoA) (No2)'	0.00561294	0.000623916	-0.954064	-0.888843
'ECOAH4No1'	'3-hydroxyacyl-CoA dehydratase (3-hydroxydecanoyl-CoA) (No1)'	0.00589359	0.000655112	-0.954064	-0.888843
'arm_ECOAH4'	'3-hydroxyacyl-CoA dehydratase (3-hydroxydecanoyl-CoA) (arm)'	0.00589359	0.000655112	-0.954064	-0.888843
'IMPDNo1'	'IMP dehydrogenase (No1)'	0.00589359	0.000655112	-0.954064	-0.888843
'IMPCNo1'	'IMP cyclohydrolase (No1)'	0.00589359	0.000655112	-0.954064	-0.888843
'HCO3ENo2'	'HCO3 equilibration reaction (No2)'	0.00589359	0.000655112	-0.954064	-0.888843
'HCO3ENo1'	'HCO3 equilibration reaction (No1)'	0.00589359	0.000655112	-0.954064	-0.888843
'arm_HCO3E'	'HCO3 equilibration reaction (arm)'	0.00589359	0.000655112	-0.954064	-0.888843
'TMDPPNo1'	'Thymidine phosphorylase (No1)'	0.00589359	0.000655112	-0.954064	-0.888843
'UPPDC1No1'	'Uroporphyrinogen decarboxylase (uroporphyrinogen III) (No1)'	0.00589359	0.000655112	-0.954064	-0.888843
'UPP3SNo1'	'Uroporphyrinogen-III synthase (No1)'	0.00589359	0.000655112	-0.954064	-0.888843
'GRTTNo1'	'Geranyltranstransferase (No1)'	0.00561294	0.000623916	-0.954064	-0.888843
'DMATTNo1'	'Dimethylallyltranstransferase (No1)'	0.00561294	0.000623916	-0.954064	-0.888843
'RBFSbNo1'	'Riboflavin synthase (No1)'	0.00561294	0.000623916	-0.954064	-0.888843
'ACP1_FMNNo3'	'Acid phosphatase (FMN) (No3)'	0.00561294	0.000623916	-0.954064	-0.888843
'ACP1_FMNNo2'	'Acid phosphatase (FMN) (No2)'	0.0130969	0.0014558	-0.954064	-0.888843
'ACP1_FMNNo1'	'Acid phosphatase (FMN) (No1)'	0.0130969	0.0014558	-0.954064	-0.888843
'arm_ACP1_FMN'	'Acid phosphatase (FMN) (arm)'	0.0130969	0.0014558	-0.954064	-0.888843
'RBFKNo1'	'Riboflavin kinase (No1)'	0.00637145	0.000708229	-0.954064	-0.888843
'DB4PSNo1'	'3,4-Dihydroxy-2-butanone-4-phosphate synthase (No1)'	0.00637145	0.000708229	-0.954064	-0.888843
'LEUTAiNo2'	'Leucine transaminase (irreversible) (No2)'	0.00589359	0.000655112	-0.954064	-0.888843
'G3PD5No2'	'Glycerol-3-phosphate dehydrogenase (ubiquinone-8) (No2)'	0.00589359	0.000655112	-0.954064	-0.888843
'G3PD5No1'	'Glycerol-3-phosphate dehydrogenase (ubiquinone-8) (No1)'	0.00589359	0.000655112	-0.954064	-0.888843
'arm_G3PD5'	'Glycerol-3-phosphate dehydrogenase (ubiquinone-8) (arm)'	0.0130969	0.0014558	-0.954064	-0.888843
'TRPS2No1'	'Tryptophan synthase (indole) (No1)'	0.00561294	0.000623916	-0.954064	-0.888843
'PFK_3No1'	'Phosphofructokinase (s7p) (No1)'	0.00561294	0.000623916	-0.954064	-0.888843
'GLYCTO4No1'	'Glycolate oxidase (No1)'	0.00561294	0.000623916	-0.954064	-0.888843
'GLYCTO3No1'	'Glycolate oxidase (No1)'	0.00589359	0.000655112	-0.954064	-0.888843
'GLYCTO2No1'	'Glycolate oxidase (No1)'	0.00589359	0.000655112	-0.954064	-0.888843
'DHORD5No1'	'Dihydroorotic acid (menaquinone-8) (No1)'	0.00589359	0.000655112	-0.954064	-0.888843
'SUCCt1pp_REV'	'Succinate transport via diffusion in (periplasm) (reversible)'	0.00589359	0.000655112	-0.954064	-0.888843
'FUMt1pp_REV'	'Fumarate transport via diffusion in (periplasm) (reversible)'	0.00589359	0.000655112	-0.954064	-0.888843
'ASPtpp_REV'	'L-aspartate uptake via facillitated diffusion (reversible)'	0.00589359	0.000655112	-0.954064	-0.888843
'EX_2dglc_e_REV'	'2-Deoxy-D-glucose exchange (reversible)'	0.00589359	0.000655112	-0.954064	-0.888843
'AI2tex_REV'	'Ai2 transport, outer membrane (reversible)'	0.00589359	0.000655112	-0.954064	-0.888843
'METGLCURtex_REV'	'1-O-methyl-Beta-D-glucuronate via diffusion (extracellular) (reversible)'	0.00589359	0.000655112	-0.954064	-0.888843
'EX_metglcur_e_REV'	'1-O-methyl-Beta-D-glucuronate exchange (reversible)'	0.00589359	0.000655112	-0.954064	-0.888843
'4ABZGLUtex_REV'	'P-aminobenzoyl glutamate transport via diffusion (extracellular to periplasm) (reversible)'	0.00589359	0.000655112	-0.954064	-0.888843
'EX_4abzglu_e_REV'	'4-aminobenzoyl-glutamate exchange (reversible)'	0.00589359	0.000655112	-0.954064	-0.888843
'MEPNtex_REV'	'Methylphosphonic acid transport via diffusion (extracellular to periplasm) (reversible)'	0.00589359	0.000655112	-0.954064	-0.888843
'CS1tex_REV'	'Cesium transport via diffusion (reversible)'	0.014734	0.00163778	-0.954064	-0.888843
'Ftex_REV'	'Fluoride transport via diffusion (reversible)'	0.00589359	0.000655112	-0.954064	-0.888843
'EX_mepn_e_REV'	'Methylphosphonic acid exchange (reversible)'	0.00226677	0.000251966	-0.954064	-0.888843
'EX_cs1_e_REV'	'Cesium ion exchange (reversible)'	0.014734	0.00137985	-1.02849	-0.906349
'URATEtex_REV'	'Uric acid transport (reversible)'	0.00261937	0.000291161	-0.954064	-0.888843
'EX_dhps_e_REV'	'2,3-Dihydroxypropane-1-sulfonate exchange (reversible)'	0.00589359	0.000655112	-0.954064	-0.888843
'SQtex_REV'	'Sulphoquinovose transport via diffusion (reversible)'	0.00589359	0.000655112	-0.954064	-0.888843
'2DGLCtex_REV'	'2-Deoxy-D-glucose transport via diffusion (extracellular) (reversible)'	0.00589359	0.000655112	-0.954064	-0.888843
'FADtex_REV'	'FAD transport, outer membrane (reversible)'	0.00589359	0.000655112	-0.954064	-0.888843
'GLYtpp_REV'	'Glycine transport via facillitated diffusion (reversible)'	0.00589359	0.000655112	-0.954064	-0.888843
'4ABZGLUtr_REV'	'P-aminobenzoyl glutamate:H+ symporter (reversible)'	0.00589359	0.000655112	-0.954064	-0.888843
'EX_mththf_e_REV'	'(2R,4S)-2-methyl-2,3,3,4-tetrahydroxytetrahydrofuran exchange (reversible)'	0.0294679	0.00327556	-0.954064	-0.888843
'FMNtex_REV'	'FMN transport, outer membrane (reversible)'	0.0214142	0.00398379	-0.730407	-0.813966
'DHPStex_REV'	'2,3-dihydroxypropane 1-sulfonate transport via diffusion (reversible)'	0.0181618	0.00327556	-0.743872	-0.819645
'PSURItex_REV'	'Pseudouridine transport via diffusion (extracellular to periplasm) (reversible)'	0.117872	0.0131022	-0.954064	-0.888843
'DXYLONtpp_REV'	'D-xylonate reversible tranposrt (periplasm) (reversible)'	0.00736699	0.00081889	-0.954064	-0.888843
'CRNDtex_REV'	'D-carnitine transport via diffusion (extracellular to periplasm) (reversible)'	0.00736699	0.00081889	-0.954064	-0.888843
'CHTBStex_REV'	'Chitobiose transport via diffusion (extracellular to periplasm) (reversible)'	0.00240555	0.000267393	-0.954064	-0.888843
'SUCTARTtpp_REV'	'Succinate:D-tartrate antiporter (periplasm) (reversible)'	0.00589359	0.000655112	-0.954064	-0.888843
'PYDAMtex_REV'	'Pyridoxamine transport via diffusion (extracellular) (reversible)'	0.0294679	0.00327556	-0.954064	-0.888843
'PYDXNtex_REV'	'Pyridoxine transport via diffusion (extracellular) (reversible)'	0.0112582	0.00163778	-0.837213	-0.854525
'SUCMALtpp_REV'	'Succinate:malate antiporter (periplasm) (reversible)'	0.0150109	0.00327556	-0.661122	-0.781788
'SUCASPtpp_REV'	'Succinate:aspartate antiporter (periplasm) (reversible)'	0.00637145	0.000708229	-0.954064	-0.888843
'PYDXtex_REV'	'Pyridoxal transport via diffusion (extracellular) (reversible)'	0.00589359	0.000655112	-0.954064	-0.888843
'DMSOtpp_REV'	'Dimethyl sulfoxide transport via diffusion (periplasm) (reversible)'	0.00294679	0.000327556	-0.954064	-0.888843
'EX_arbt_e_REV'	'Arbutin exchange (reversible)'	0.00589359	0.000655112	-0.954064	-0.888843
'BTNtex_REV'	'Biotin transport via diffusion (extracellular to periplasm) (reversible)'	0.014734	0.00163778	-0.954064	-0.888843
'TARTRDtex_REV'	'D-tartrate transport via diffusion (extracellular to periplasm) (reversible)'	0.014734	0.00163778	-0.954064	-0.888843
'CH4tex_REV'	'Methane Transport(extracellular via diffusion) (reversible)'	0.014734	0.00163778	-0.954064	-0.888843
'SLNTtex_REV'	'Selenite transport via diffusion (extracellular to periplasm) (reversible)'	0.014734	0.00163778	-0.954064	-0.888843
'TTRCYCtex_REV'	'Tetracycline transport via diffusion (extracellular to periplasm) (reversible)'	0.0176073	0.00327556	-0.730407	-0.813966
'EX_5mtr_e_REV'	'5-Methylthio-D-ribose exchange (reversible)'	0.00736699	0.00081889	-0.954064	-0.888843
'MEOHtex_REV'	'Methanol transport via diffusion (extracellular to periplasm) (reversible)'	0.0176073	0.00327556	-0.730407	-0.813966
'SELtex_REV'	'Selenate transport via diffusion (extracellular to periplasm) (reversible)'	0.00736699	0.00081889	-0.954064	-0.888843
'MEOHtrpp_REV'	'Methanol reversible transport via diffusion (periplasm) (reversible)'	0.00637145	0.000708229	-0.954064	-0.888843
'DM_mththf_c_REV'	'Sink needed to allow (2R,4S)-2-methyl-2,3,3,4-tetrahydroxytetrahydrofuran to leave system (reversible)'	0.000886254	9.8513e-05	-0.954064	-0.888843
'EX_3hpp_e_REV'	'3-Hydroxypropanoate exchange (reversible)'	0.00900655	0.00109117	-0.916665	-0.878847
'EX_quin_e_REV'	'Quinate exchange (reversible)'	4.46045e-09	2.82047e-09	-0.199057	-0.367671
'QUIN2tex_REV'	'Quinate transport via diffusion (extracellular to periplasm) (reversible)'	0.00982265	0.00109185	-0.954064	-0.888843
'EX_rfamp_e_REV'	'Rifampin exchange (reversible)'	0.0294679	0.00327556	-0.954064	-0.888843
'FUSAtex_REV'	'Fusidic acid transport via diffusion (extracellular to periplasm) (reversible)'	0.0541466	0.572522	1.02422	9.57356
'EX_novbcn_e_REV'	'Novobiocin exchange (reversible)'	0.0010635	0.000118216	-0.954064	-0.888843
'EX_cm_e_REV'	'Chloramphenicol exchange (reversible)'	6.69134e-05	6.69016e-05	-7.62434e-05	-0.000175542
'DM_4crsol_c_REV'	'Sink needed to allow p-Cresol to leave system (reversible)'	0.0281067	0.00655463	-0.632261	-0.766795
'EX_ttrcyc_e_REV'	'Tetracycline exchange (reversible)'	0.00589359	0.000655112	-0.954064	-0.888843
'EX_LalaLglu_e_REV'	'L-alanine-L-glutamate exchange (reversible)'	0.0294679	0.00327556	-0.954064	-0.888843
'EX_LalaDglu_e_REV'	'L-alanine-D-glutamate exchange (reversible)'	0.014734	0.00163778	-0.954064	-0.888843
'3HPPtex_REV'	'3-hydroxypropionate transport via diffusion (extracellular to periplasm) (reversible)'	0.0186252	0.00327556	-0.754815	-0.824133
'LALADGLUtex_REV'	'L-alanyl-D-glutamate transport via diffusion (extracellular to periplasm) (reversible)'	0.00589359	0.000655112	-0.954064	-0.888843
'5MTRtex_REV'	'5-Methylthio-D-ribose transport via proton diffusion (extracellular to periplasm) (reversible)'	0.00589359	0.000655112	-0.954064	-0.888843
'LALALGLUtex_REV'	'L-alanyl-L-glutamate transport via diffusion (extracellular to periplasm) (reversible)'	0.00589359	0.000655112	-0.954064	-0.888843
'ETOHtrpp_REV'	'Ethanol reversible transport via diffusion (periplasm) (reversible)'	0.00589359	0.000655112	-0.954064	-0.888843
'DOXRBCNtex_REV'	'Doxorubicin transport via diffusion (extracellular to periplasm) (reversible)'	0.00589359	0.000655112	-0.954064	-0.888843
'MINCYCtex_REV'	'Minocycline transport via diffusion (extracellular to periplasm) (reversible)'	0.000238948	0.000238906	-7.53554e-05	-0.000173497
'RFAMPtex_REV'	'Rifampin transport via diffusion (extracellular to periplasm) (reversible)'	0.00589359	0.000655112	-0.954064	-0.888843
'EX_slnt_e_REV'	'Selenite exchange (reversible)'	0.00406454	0.000451801	-0.954064	-0.888843
'EX_ppal_e_REV'	'Propanal exchange (reversible)'	0.00294679	0.000327556	-0.954064	-0.888843
'MG2t3_2pp_REV'	'Magnesium (Mg+2) transport in/out via proton antiport (periplasm) (reversible)'	0.00294679	0.000327556	-0.954064	-0.888843
'THYMtex_REV'	'Thymine transport via diffusion (extracellular to periplasm) (reversible)'	0.00294679	0.000327556	-0.954064	-0.888843
'PSCLYStex_REV'	'Psicoselysine transporter via diffusion (extracellular) (reversible)'	0.00294679	0.000327556	-0.954064	-0.888843
'PPAtex_REV'	'Propionate transport via diffusion (reversible)'	0.00294679	0.000327556	-0.954064	-0.888843
'EX_5dglcn_e_REV'	'5-Dehydro-D-gluconate exchange (reversible)'	0.0298583	0.00366592	-0.910883	-0.877223
'5DGLCNtex_REV'	'5-Dehydro-D-gluconate transport via diffusion (extracellular to periplasm) (reversible)'	0.0298583	0.00366592	-0.910883	-0.877223
'EX_galctn__L_e_REV'	'L-Galactonate exchange (reversible)'	0.00226677	0.000251966	-0.954064	-0.888843
'GALCTNLtex_REV'	'L-galactonate transport via diffusion (extracellular to periplasm) (reversible)'	0.0225164	0.00491334	-0.661122	-0.781788
'5DGLCNt2rpp_REV'	'5-Dehydro-D-gluconate transport via proton symport, reversible (periplasm) (reversible)'	0.014734	0.000903696	-1.2123	-0.938666
'CAt6pp_REV'	'Calcium / sodium antiporter (1:1) (reversible)'	0.00589359	0.000655112	-0.954064	-0.888843
'DM_aacald_c_REV'	'Sink needed to allow aminoacetaldehyde to leave system (reversible)'	0.00294679	0.000327556	-0.954064	-0.888843
'TUNGStex_REV'	'Tungstate transport via diffusion (extracellular to periplasm) (reversible)'	0.00294679	0.000327556	-0.954064	-0.888843
'EX_psclys_e_REV'	'Psicoselysine exchange (reversible)'	0.00294679	0.000327556	-0.954064	-0.888843
'EX_crn__D_e_REV'	'D-carnitine exchange (reversible)'	0.00294679	0.000327556	-0.954064	-0.888843
'GTHRDtex_REV'	'Glutathione transport via diffusion (extracellular to periplasm) (reversible)'	0.00256846	0.000308288	-0.920716	-0.879972
'EX_cpgn_un_e_REV'	'Coprogen unloaded (no Fe(III)) exchange (reversible)'	0.0294679	0.00327556	-0.954064	-0.888843
'GTHOXtex_REV'	'Glutathione (ox) transport via diffusion (extracellular to periplasm) (reversible)'	0.0108043	0.00127983	-0.926446	-0.881545
'EX_urate_e_REV'	'Urate exchange (reversible)'	0.00168388	0.000187175	-0.954064	-0.888843
'CGLYtex_REV'	'L-Cysteinylglycine transport via diffusion (extracellular to periplasm) (reversible)'	0.00168388	0.000187175	-0.954064	-0.888843
'EX_12ppd__R_e_REV'	'(R)-Propane-1,2-diol exchange (reversible)'	0.0294679	0.00327556	-0.954064	-0.888843
'PPALtpp_REV'	'Propanal transport via channel (periplasm) (reversible)'	4.46045e-09	2.82047e-09	-0.199057	-0.367671
'ACONIs_REV'	'Aconitate isomerase (spontaneous) (reversible)'	0.0392906	0.00436741	-0.954064	-0.888843
'12PPDRtex_REV'	'(R)-Propane-1,2-diol transport via diffusion (extracellular to periplasm) (reversible)'	0.00175928	0.000195556	-0.954064	-0.888843
'CUtex_REV'	'Copper (Cu+1) transport via diffusion (extracellular to periplasm) (reversible)'	0.00175928	0.000195556	-0.954064	-0.888843
'CA2tex_REV'	'Calcium (Ca+2) transport via diffusion (extracellular to periplasm) (reversible)'	0.00261937	0.000291161	-0.954064	-0.888843
'12PPDRtpp_REV'	'(R)-Propane-1,2-diol facilitated transport (periplasm) (reversible)'	0.000154366	3.26332e-05	-0.674891	-0.788598
'GLCtex_copy2_REV'	' (reversible)'	0.0294679	0.00327556	-0.954064	-0.888843
'EX_pydx_e_REV'	'Pyridoxal exchange (reversible)'	2.37326e-05	2.63803e-06	-0.954064	-0.888843
'EX_lipoate_e_REV'	'Lipoate exchange (reversible)'	2.37326e-05	2.63803e-06	-0.954064	-0.888843
'EX_maltttr_e_REV'	'Maltotetraose exchange (reversible)'	2.37326e-05	2.63803e-06	-0.954064	-0.888843
'EX_man6p_e_REV'	'D-Mannose 6-phosphate exchange (reversible)'	0.117872	0.0131022	-0.954064	-0.888843
'23DAPPAtex_REV'	'2,3-diaminopropionate transport via diffusion (reversible)'	0.117872	0.0131022	-0.954064	-0.888843
'EX_cl_e_REV'	'Chloride exchange (reversible)'	0.0321291	0.00593649	-0.733369	-0.81523
'UMPtex_REV'	'UMP transport via diffusion (extracellular to periplasm) (reversible)'	2.37326e-05	2.63803e-06	-0.954064	-0.888843
'IMPtex_REV'	'IMP transport via diffusion (extracellular to periplasm) (reversible)'	2.37326e-05	2.63803e-06	-0.954064	-0.888843
'GMPtex_REV'	'GMP transport via diffusion (extracellular to periplasm) (reversible)'	0.0294679	0.00327556	-0.954064	-0.888843
'DTMPtex_REV'	'DTMP transport via diffusion (extracellular to periplasm) (reversible)'	2.37326e-05	2.63803e-06	-0.954064	-0.888843
'DGMPtex_REV'	'DGMP transport via diffusion (extracellular to periplasm) (reversible)'	2.37326e-05	2.63803e-06	-0.954064	-0.888843
'DAMPtex_REV'	'DAMP transport via diffusion (extracellular to periplasm) (reversible)'	0.000830083	9.22693e-05	-0.954064	-0.888843
'EX_34dhpac_e_REV'	'3,4-Dihydroxyphenylacetaldehyde exchange (reversible)'	0.000736699	8.1889e-05	-0.954064	-0.888843
'EX_g3pc_e_REV'	'Sn-Glycero-3-phosphocholine exchange (reversible)'	0.014734	0.00163778	-0.954064	-0.888843
'EX_tcynt_e_REV'	'Thiocyanate exchange (reversible)'	2.37326e-05	2.63803e-06	-0.954064	-0.888843
'EX_aso3_e_REV'	'Arsenite exchange (reversible)'	0.0294679	0.00327556	-0.954064	-0.888843
'EX_14glucan_e_REV'	'1,4-alpha-D-glucan exchange (reversible)'	0.00182843	0.000209636	-0.940612	-0.885346
'EX_udpgal_e_REV'	'UDPgalactose exchange (reversible)'	2.37326e-05	2.63803e-06	-0.954064	-0.888843
'EX_acgal1p_e_REV'	'N-Acetyl-D-galactosamine 1-phosphate exchange (reversible)'	0.000346682	3.8536e-05	-0.954064	-0.888843
'G3PCtex_REV'	'Glycero-3-phosphocholine transport via diffusion (extracellular to periplasm) (reversible)'	0.000417985	4.64618e-05	-0.954064	-0.888843
'EX_acgal_e_REV'	'N-Acetyl-D-galactosamine exchange (reversible)'	0.00693363	0.00077072	-0.954064	-0.888843
'FALDtex_REV'	'Formaldehyde transport via diffusion (extracellular to periplasm) (reversible)'	0.0294679	0.00327556	-0.954064	-0.888843
'ANHGMtex_REV'	'GlcNAc-anhMurNAc transport via diffusion (extracellular to periplasm) (reversible)'	0.014734	0.00163778	-0.954064	-0.888843
'3PEPTtex_REV'	'LalaDgluMdap (tripeptide) transport via diffusion (extracellular to periplasm) (reversible)'	0.0294679	0.00327556	-0.954064	-0.888843
'EX_g3pe_e_REV'	'Sn-Glycero-3-phosphoethanolamine exchange (reversible)'	0.0589359	0.00655112	-0.954064	-0.888843
'TYMtex_REV'	'Tyramine transport via diffusion (extracellular to periplasm) (reversible)'	0.00714374	0.000794075	-0.954064	-0.888843
'EX_acser_e_REV'	'O-Acetyl-L-serine exchange (reversible)'	0.0294679	0.00327556	-0.954064	-0.888843
'EX_cys__D_e_REV'	'D-Cysteine exchange (reversible)'	0.0294679	0.00327556	-0.954064	-0.888843
'EX_ag_e_REV'	'Silver exchange (reversible)'	0.180641	0.0282188	-0.806277	-0.843785
'EX_dump_e_REV'	'DUMP exchange (reversible)'	0.00256243	0.000284831	-0.954064	-0.888843
'EX_gal_bD_e_REV'	'Beta D-Galactose exchange (reversible)'	0.00256243	0.000284831	-0.954064	-0.888843
'ALLTNtex_REV'	'Allantoin transport via diffusion (extracellular to periplasm) (reversible)'	250.241	250.231	-1.84764e-05	-4.25425e-05
'AKGtex_REV'	'Alpha-ketoglutarate transport via diffusion (extracellular to periplasm) (reversible)'	0.180641	0.0737596	-0.388997	-0.591678
'SBTtex_REV'	'D-sorbitol transport via diffusion (extracellular to periplasm) (reversible)'	0.00955823	0.00113932	-0.92373	-0.880802
'PROtex_REV'	'L-proline transport via diffusion (extracellular to periplasm) (reversible)'	0.00210485	0.000233968	-0.954064	-0.888843
'EX_orot_e_REV'	'Orotate exchange (reversible)'	0.00176938	0.000206334	-0.93325	-0.883386
'EX_gsn_e_REV'	'Guanosine exchange (reversible)'	0.00187098	0.000207972	-0.954064	-0.888843
'EX_cys__L_e_REV'	'L-Cysteine exchange (reversible)'	0.0294679	0.00327556	-0.954064	-0.888843
'EX_pydxn_e_REV'	'Pyridoxine exchange (reversible)'	6.69134e-05	0.000111497	0.221751	0.666292
'EX_thrp_e_REV'	'L-Threonine O-3-phosphate exchange (reversible)'	0.0236089	0.0052049	-0.656664	-0.779537
'EX_glcur1p_e_REV'	'D-Glucuronate 1-phosphate exchange (reversible)'	0.0589359	0.0072499	-0.910048	-0.876987
'CLtex_REV'	'Chloride (Cl-1) transport via diffusion (extracellular to periplasm) (reversible)'	0.049495	55.3201	3.04832	1116.69
'CU2tex_REV'	'Copper (Cu+2) transport via diffusion (extracellular to periplasm) (reversible)'	1.33774	0.63609	-0.322853	-0.524504
'EX_acgam1p_e_REV'	'N-Acetyl-D-glucosamine 1-phosphate exchange (reversible)'	0.00135485	0.0001506	-0.954064	-0.888843
'EX_dmso_e_REV'	'Dimethyl sulfoxide exchange (reversible)'	0.00256846	0.000308288	-0.920716	-0.879972
'ARGORNt7pp_REV'	'Arginine/ornithine antiporter (periplasm) (reversible)'	0.0294679	0.00327556	-0.954064	-0.888843
'EX_na1_e_REV'	'Sodium exchange (reversible)'	0.0160646	0.00296825	-0.733369	-0.81523
'EX_csn_e_REV'	'Cytosine exchange (reversible)'	0.0442558	0.00771823	-0.758453	-0.8256
'EX_malthx_e_REV'	'Maltohexaose exchange (reversible)'	0.000747601	8.31009e-05	-0.954064	-0.888843
'EX_halipa_e_REV'	'Hepta-acylated KDO(2)-lipid (A) exchange (reversible)'	1.34813e-08	8.43694e-09	-0.203547	-0.374175
'EX_thr__L_e_REV'	'L-Threonine exchange (reversible)'	0.0294679	0.00655112	-0.653034	-0.777687
'EX_phe__L_e_REV'	'L-Phenylalanine exchange (reversible)'	998.976	2.6603	-2.57462	-0.997337
'EX_so4_e_REV'	'Sulfate exchange (reversible)'	0.00240555	0.000267393	-0.954064	-0.888843
'EX_mobd_e_REV'	'Molybdate exchange (reversible)'	0.0589359	0.00655112	-0.954064	-0.888843
'EX_gam_e_REV'	'D-Glucosamine exchange (reversible)'	0.0294679	0.00327556	-0.954064	-0.888843
'4PEPTtex_REV'	'LalaDgluMdapDala (pentapeptide) transport via diffusion (extracellular to periplasm) (reversible)'	0.0100315	0.00229628	-0.640342	-0.771094
'EX_glyc2p_e_REV'	'Glycerol 2-phosphate exchange (reversible)'	1.0411e-07	6.5832e-08	-0.199057	-0.367672
'EX_r5p_e_REV'	'Alpha-D-Ribose 5-phosphate exchange (reversible)'	0.0294679	0.00327556	-0.954064	-0.888843
'EX_ddca_e_REV'	'Dodecanoate (n-C12:0) exchange (reversible)'	0.00955823	0.00113932	-0.92373	-0.880802
'H2Stex_REV'	'H2s transport via diffusion (extracellular to periplasm) (reversible)'	1000	2000	0.30103	1
'ACNAMtex_REV'	'N-acetylneuraminate transport via diffusion (extracellular to periplasm) (reversible)'	0.014734	0.00163778	-0.954064	-0.888843
'ACACtex_REV'	'Acetoacetate transport via diffusion (extracellular to periplasm) (reversible)'	0.014734	0.00163778	-0.954064	-0.888843
'EX_no2_e_REV'	'Nitrite exchange (reversible)'	0.00982265	0.00109185	-0.954064	-0.888843
'PTRCORNt7pp_REV'	'Putrescine/ornithine antiporter (periplasm) (reversible)'	0.0589359	0.00655112	-0.954064	-0.888843
'UREAtpp_REV'	'Urea transport via facilitate diffusion (periplasm) (reversible)'	3.90425e-06	1999.96	8.70948	5.12252e+08
'EX_ala__D_e_REV'	'D-Alanine exchange (reversible)'	2.0004e-07	2.00005e-07	-7.58084e-05	-0.00017454
'EX_h2o_e_REV'	'H2O exchange (reversible)'	0.0212279	0.00468511	-0.656188	-0.779295
'GLCRt2rpp_REV'	'D-glucarate transport via proton symport, reversible (periplasm) (reversible)'	0.0294679	0.00327556	-0.954064	-0.888843
'DIMPtex_REV'	'DIMP transport via diffusion (extracellular to periplasm) (reversible)'	0.0212279	0.00468511	-0.656188	-0.779295
'HISt2rpp_REV'	'L-histidine reversible transport via proton symport (periplasm) (reversible)'	0.014734	0.000903696	-1.2123	-0.938666
'EX_hacolipa_e_REV'	'Hepta-acylated core oligosaccharide lipid A (E. coli) exchange (reversible)'	0.0027412	0.000304703	-0.954064	-0.888843
'GLYCAtex_REV'	'D-glycerate transport via diffusion (extracellular to periplasm) (reversible)'	0.216052	3.02157e-08	-6.85433	-1
'EX_frulys_e_REV'	'Fructoselysine exchange (reversible)'	0.0160423	0.00294595	-0.736041	-0.816363
'MANGLYCtex_REV'	'2-O-alpha-mannosyl-D-glycerate transport via diffusion (extracellular to periplasm) (reversible)'	0.0294679	0.00327556	-0.954064	-0.888843
'ASO3tex_REV'	'Arsenite transport via diffusion (extracellular to periplasm) (reversible)'	0.00491132	0.000545926	-0.954064	-0.888843
'EX_etha_e_REV'	'Ethanolamine exchange (reversible)'	0.0027412	1999.95	5.86308	729587
'GLYALDtpp_REV'	'Glyceraldehyde facilitated diffusion (periplasm) (reversible)'	1.40062e-10	2000	13.1547	1.42793e+13
'CD2tex_REV'	'Cadmium (Cd+2) transport via diffusion (extracellular to periplasm) (reversible)'	0.000747601	8.31009e-05	-0.954064	-0.888843
'Zn2tex_REV'	'Zinc (Zn+2) transport via diffusion (extracellular to periplasm) (reversible)'	0.000747601	8.31009e-05	-0.954064	-0.888843
'MG2tex_REV'	'Magnesium (Mg+2) transport via diffusion (extracellular to periplasm) (reversible)'	0.000714374	7.94075e-05	-0.954064	-0.888843
'MMETtex_REV'	'S-methyl-L-methionine transport via diffusion (extracellular to periplasm) (reversible)'	0.00137862	0.000153243	-0.954064	-0.888843
'ASCBtex_REV'	'L-ascorbate transport via diffusion (extracellular to periplasm) (reversible)'	0.00261937	0.000291161	-0.954064	-0.888843
'ARBtex_REV'	'L-arabinose transport via diffusion (extracellular to periplasm) (reversible)'	0.117872	0.0131022	-0.954064	-0.888843
'AMPtex_REV'	'AMP transport via diffusion (extracellular to periplasm) (reversible)'	1000	0	-18	-1
'ADNtex_REV'	'Adenosine transport via diffusion (extracellular to periplasm) (reversible)'	0.00420971	0.000467937	-0.954064	-0.888843
'ADEtex_REV'	'Adenine transport via diffusion (extracellular to periplasm) (reversible)'	0.000360464	4.0068e-05	-0.954064	-0.888843
'EX_pydam_e_REV'	'Pyridoxamine exchange (reversible)'	0.00714374	0.000794075	-0.954064	-0.888843
'EX_ump_e_REV'	'UMP exchange (reversible)'	1.34813e-08	0.000467945	4.54046	34709.7
'EX_h2o2_e_REV'	'Hydrogen peroxide exchange (reversible)'	0.000358455	3.98446e-05	-0.954064	-0.888843
'EX_cgly_e_REV'	'Cys-Gly exchange (reversible)'	0.117872	0.0131022	-0.954064	-0.888843
'EX_fecrm_un_e_REV'	'Ferrichrome minus Fe(III) exchange (reversible)'	0.0294679	0.00327556	-0.954064	-0.888843
'PROt2rpp_REV'	'L-proline reversible transport via proton symport (periplasm) (reversible)'	0.0108402	0.00353045	-0.487208	-0.674319
'NO2t2rpp_REV'	'Nitrite transport in via proton symport, reversible (periplasm) (reversible)'	0.0359619	0.00632289	-0.754927	-0.824178
'NH4tpp_REV'	'Ammonia reversible transport (periplasm) (reversible)'	0.00906706	1997.84	5.34309	220339
'EX_23dappa_e_REV'	'2,3-diaminopropionate exchange (reversible)'	0.0010635	0.000118216	-0.954064	-0.888843
'EX_fe3hox_un_e_REV'	'Fe(III)hydoxamate, unloaded exchange (reversible)'	6.69134e-05	0.000111497	0.221751	0.666293
'L_LACt2rpp_REV'	'L-lactate reversible transport via proton symport (periplasm) (reversible)'	0.00982265	0.00109185	-0.954064	-0.888843
'NI2tex_REV'	'Nickel transport via diffusion (extracellular to periplasm) (reversible)'	0.00107156	0.000119111	-0.954064	-0.888843
'G6Ptex_REV'	'Glucose 6-phosphate transport via diffusion (extracellular to periplasm) (reversible)'	0.0027412	0.000304703	-0.954064	-0.888843
'EX_cd2_e_REV'	'Cadmium exchange (reversible)'	0.180641	0.0282188	-0.806277	-0.843785
'CITtex_REV'	'Citrate transport via diffusion (extracellular to periplasm) (reversible)'	0.00955823	0.00113932	-0.92373	-0.880802
'R5Ptex_REV'	'Ribose 5-phosphate transport via diffusion (extracellular to periplasm) (reversible)'	0.0093176	0.00221692	-0.623554	-0.762072
'MSO3tex_REV'	'Methanesulfonate transport via diffusion (extracellular to periplasm) (reversible)'	0.00420971	0.000467937	-0.954064	-0.888843
'ACGAM1Ptex_REV'	'N-acetyl-D-glucosamine 1-phosphate transport via diffusion (extracellular to periplasm) (reversible)'	0.0239296	0.0147731	-0.209465	-0.382645
'UDPGALtex_REV'	'UDPgalactose transport via diffusion (extracellular to periplasm) (reversible)'	0.00982265	0.00109185	-0.954064	-0.888843
'UDPGtex_REV'	'UDPglucose transport via diffusion (extracellular to periplasm) (reversible)'	0.00250791	0.000278771	-0.954064	-0.888843
'UDPGLCURtex_REV'	'UDP-D-glucuronate transport via diffusion (extracellular to periplasm) (reversible)'	0.0027412	0.000304703	-0.954064	-0.888843
'GLCUR1Ptex_REV'	'D-glucuronate 1-phosphate transport via diffusion (extracellular to periplasm) (reversible)'	0.00250791	0.000278771	-0.954064	-0.888843
'G3PStex_REV'	'Glycerophosphserine transport via diffusion (extracellular to periplasm) (reversible)'	0.01011	0.00280031	-0.557546	-0.723016
'4HOXPACDtex_REV'	'4-hydroxyphenylacetaldehyde transport via diffusion (extracellular to periplasm) (reversible)'	0.0294679	0.00327556	-0.954064	-0.888843
'DOPAtex_REV'	'Dopamine transport via diffusion (extracellular to periplasm) (reversible)'	0.0294679	0.00327556	-0.954064	-0.888843
'EX_imp_e_REV'	'IMP exchange (reversible)'	0.014734	0.00163778	-0.954064	-0.888843
'FALDtpp_REV'	'Formaldehyde transport via diffusion (periplasm) (reversible)'	0.0235744	0.00262045	-0.954064	-0.888843
'3GMPtex_REV'	'3GMP transport via diffusion (extracellular to periplasm) (reversible)'	0.0589359	0.00655112	-0.954064	-0.888843
'METSOX2tex_REV'	'L-methionine R-oxide diffusion (extracellular) (reversible)'	0.00294679	0.000327556	-0.954064	-0.888843
'METSOX1tex_REV'	'L-methionine S-oxide diffusion (extracellular) (reversible)'	0.117872	0.0131022	-0.954064	-0.888843
'TCYNTtex_REV'	'Thiocyanate transport via diffusion (extracellular to periplasm) (reversible)'	0.00453353	0.000503932	-0.954064	-0.888843
'SO3tex_REV'	'Sulfite transport via diffusion (extracellular to periplasm) (reversible)'	0.180641	0.0737596	-0.388997	-0.591678
'CYANtex_REV'	'Cyanide transport via diffusion (extracellular to periplasm) (reversible)'	0.00103396	0.000114932	-0.954064	-0.888843
'PACALDtex_REV'	'Phenethylacetaldehyde transport via diffusion (extracellular to periplasm) (reversible)'	0.0392906	0.00436741	-0.954064	-0.888843
'PEAMNtex_REV'	'Phenethylamine transport via diffusion (extracellular to periplasm) (reversible)'	0.0294679	0.00327556	-0.954064	-0.888843
'PACALDt2rpp_REV'	'Phenylacetaldehyde reversible transport via proton symport (periplasm) (reversible)'	0.211469	0.0824944	-0.408823	-0.609899
'CTBTt2rpp_REV'	'Cronobetaine outward transport (H+ antiport) (reversible)'	4.77846e-08	3.02157e-08	-0.199056	-0.367669
'CRNDt2rpp_REV'	'D-carnitine outward transport (H+ antiport) (reversible)'	0.0294679	0.00327556	-0.954064	-0.888843
'N2Otpp_REV'	'Nitrious oxide transport (diffusion) (reversible)'	0.000175404	1.94974e-05	-0.954064	-0.888843
'NOtpp_REV'	'NO transport (diffusion) (reversible)'	0.0294679	0.00327556	-0.954064	-0.888843
'EX_butso3_e_REV'	'Butanesulfonate exchange (reversible)'	0.000751574	8.35424e-05	-0.954064	-0.888843
'SULFACtex_REV'	'Sulfoaceate transport via diffusion (extracellular to periplasm) (reversible)'	0.00103396	0.000114932	-0.954064	-0.888843
'GALBDtex_REV'	'Beta D-galactose transport via diffusion (extracellular to periplasm) (reversible)'	0.0010635	0.000118216	-0.954064	-0.888843
'BUTSO3tex_REV'	'Butanesulfonate transport via diffusion (extracellular to periplasm) (reversible)'	500.485	1000.46	0.30081	0.998986
'3AMPtex_REV'	'3AMP transport via diffusion (extracellular to periplasm) (reversible)'	0.117872	0.0131022	-0.954064	-0.888843
'23CUMPtex_REV'	'23cUMP transport via diffusion (extracellular to periplasm) (reversible)'	0.117872	0.0131022	-0.954064	-0.888843
'EX_23cump_e_REV'	'2'',3''-Cyclic UMP exchange (reversible)'	0.0294679	0.00327556	-0.954064	-0.888843
'EX_mso3_e_REV'	'Methanesulfonate exchange (reversible)'	0.00182843	0.000209636	-0.940612	-0.885346
'ABUTtex_REV'	'4-aminobutyrate transport via diffusion (extracellular to periplasm) (reversible)'	5.00108e-10	3.16196e-10	-0.199107	-0.367745
'XYLtex_REV'	'D-xylose transport via diffusion (extracellular to periplasm) (reversible)'	0.0235744	0.00262045	-0.954064	-0.888843
'VALtex_REV'	'L-valine transport via diffusion (extracellular to periplasm) (reversible)'	0.0392906	0.00436741	-0.954064	-0.888843
'URItex_REV'	'Uridine transport via diffusion (extracellular to periplasm) (reversible)'	0.0392906	0.00436741	-0.954064	-0.888843
'URAtex_REV'	'Uracil transport via diffusion (extracellular to periplasm) (reversible)'	0.0401274	0.00635362	-0.800421	-0.841664
'TYRtex_REV'	'L-tyrosine transport via diffusion (extracellular to periplasm) (reversible)'	0.00792586	0.000881012	-0.954064	-0.888843
'TRPtex_REV'	'L-tryptophan transport via diffusion (extracellular to periplasm) (reversible)'	0.00318572	0.000354114	-0.954064	-0.888843
'TREtex_REV'	'Trehalose transport via diffusion (extracellular to periplasm) (reversible)'	0.0235744	0.00262045	-0.954064	-0.888843
'NMNtex_REV'	'NMN transport via diffusion (extracellular to periplasm) (reversible)'	0.00294679	0.000327556	-0.954064	-0.888843
'FE2tex_REV'	'Iron (II) transport via diffusion (extracellular to periplasm) (reversible)'	0.00294679	0.000327556	-0.954064	-0.888843
'DMSOtex_REV'	'Dimethyl sulfoxide transport via diffusion (extracellular to periplasm) (reversible)'	9.49303e-05	1.05521e-05	-0.954064	-0.888843
'MANtex_REV'	'D-mannose transport via diffusion (extracellular to periplasm) (reversible)'	0.0107156	0.00119111	-0.954064	-0.888843
'LYXtex_REV'	'L-Lyxose transport via diffusion (extracellular to periplasm) (reversible)'	0.0107156	0.00119111	-0.954064	-0.888843
'DCYTtex_REV'	'Deoxycytidine transport via diffusion (extracellular to periplasm) (reversible)'	1000	2.53217	-2.59651	-0.997468
'DCAtex_REV'	'Decanoate transport via diffusion (extracellular to periplasm) (reversible)'	0.0392906	0.00436741	-0.954064	-0.888843
'CYTDtex_REV'	'Cytidine transport via diffusion (extracellular to periplasm) (reversible)'	0.0392906	0.00436741	-0.954064	-0.888843
'CYStex_REV'	'L-cysteine transport via diffusion (extracellular to periplasm) (reversible)'	0.0392906	0.00436741	-0.954064	-0.888843
'DINStex_REV'	'Deoxyinosine transport via diffusion (extracellular to periplasm) (reversible)'	0.0589359	0.00655112	-0.954064	-0.888843
'CRNtex_REV'	'L-carnitine transport via diffusion (extracellular to periplasm) (reversible)'	0.0589359	0.00655112	-0.954064	-0.888843
'CO2tex_REV'	'CO2 transport via diffusion (extracellular to periplasm) (reversible)'	0.00982265	0.00109185	-0.954064	-0.888843
'BUTtex_REV'	'Butyrate transport via diffusion (extracellular to periplasm) (reversible)'	0.00231121	0.000256907	-0.954064	-0.888843
'NACtex_REV'	'Nicotinic acid transport via diffusion (extracellular to periplasm) (reversible)'	1000.01	0.00077072	-6.11311	-0.999999
'NAtex_REV'	'Sodium transport via diffusion (extracellular to periplasm) (reversible)'	1000	0	-18	-1
'MNLtex_REV'	'Mannitol transport via diffusion (extracellular to periplasm) (reversible)'	0.0392906	0.00436741	-0.954064	-0.888843
'THRtex_REV'	'L-threonine transport via diffusion (extracellular to periplasm) (reversible)'	6.82064e-09	4.31291e-09	-0.199055	-0.367668
'TAURtex_REV'	'Taurine transport via diffusion (extracellular to periplasm) (reversible)'	1.73517e-07	1.0972e-07	-0.199057	-0.367672
'TARTRtex_REV'	'Tartrate transport via diffusion (extracellular to periplasm) (reversible)'	1000.01	1.00853	-2.99632	-0.998991
'SPMDtex_REV'	'Spermidine transport via diffusion (extracellular to periplasm) (reversible)'	0.0196453	0.00218371	-0.954064	-0.888843
'SO4tex_REV'	'Sulfate transport via diffusion (extracellular to periplasm) (reversible)'	0.0294679	0.00327556	-0.954064	-0.888843
'SERtex_REV'	'L-serine transport via diffusion (extracellular to periplasm) (reversible)'	0.0294679	0.00327556	-0.954064	-0.888843
'DSERtex_REV'	'D-serine transport via diffusion (extracellular to periplasm) (reversible)'	0.0294679	0.00327556	-0.954064	-0.888843
'PYRtex_REV'	'Pyruvate transport via diffusion (extracellular to periplasm) (reversible)'	0.00955823	0.00113932	-0.92373	-0.880802
'PTRCtex_REV'	'Putrescine transport via diffusion (extracellular to periplasm) (reversible)'	0.00637145	0.000708229	-0.954064	-0.888843
'PPTtex_REV'	'Phosphonate transport via diffusion (extracellular to periplasm) (reversible)'	0.00637145	0.000708229	-0.954064	-0.888843
'PPPNtex_REV'	'3-phenylpropionate transport via diffusion (extracellular to periplasm) (reversible)'	0.00240555	0.000267393	-0.954064	-0.888843
'PNTOtex_REV'	'Pantothenate transport via diffusion (extracellular to periplasm) (reversible)'	0.00245566	0.000272963	-0.954064	-0.888843
'EX_meoh_e_REV'	'Methanol exchange (reversible)'	0.00110161	0.000122451	-0.954064	-0.888843
'CYTDt2pp_copy2_REV'	' (reversible)'	0.0022635	0.000304703	-0.870903	-0.865384
'EX_ni2_e_REV'	'Ni2+ exchange (reversible)'	0.001112	0.000123606	-0.954064	-0.888843
'OCTAtex_REV'	'Octanoate transport via diffusion (extracellular to periplasm) (reversible)'	0.00142875	0.000158815	-0.954064	-0.888843
'GLCURtex_REV'	'D-glucuronat transport via diffusion (extracellular to periplasm) (reversible)'	0.00436562	0.000485268	-0.954064	-0.888843
'EX_cbi_e_REV'	'Cobinamide exchange (reversible)'	0.00736699	0.00081889	-0.954064	-0.888843
'EX_feoxam_e_REV'	'Ferroxamine exchange (reversible)'	0.00733329	0.00109185	-0.827135	-0.85111
'EX_feenter_e_REV'	'Fe-enterobactin exchange (reversible)'	0.00982265	0.00109185	-0.954064	-0.888843
'EX_fecrm_e_REV'	'Ferrichrome exchange (reversible)'	0.0392906	0.00436741	-0.954064	-0.888843
'EX_fe3hox_e_REV'	'Fe(III)hydroxamate exchange (reversible)'	1.33813e-08	8.43056e-09	-0.200643	-0.369976
'EX_fe3dcit_e_REV'	'Fe(III)dicitrate exchange (reversible)'	0.0392906	0.00436741	-0.954064	-0.888843
'ACt2rpp_REV'	'Acetate reversible transport via proton symport (periplasm) (reversible)'	0.0392906	0.00436741	-0.954064	-0.888843
'ILEtex_REV'	'L-isoleucine transport via diffusion (extracellular to periplasm) (reversible)'	0.00955823	0.00113932	-0.92373	-0.880802
'IDONtex_REV'	'L-idonate transport via diffusion (extracellular to periplasm) (reversible)'	0.00955823	0.00113932	-0.92373	-0.880802
'HYXNtex_REV'	'Hypoxanthine transport via diffusion (extracellular to periplasm) (reversible)'	0.00733329	0.00109185	-0.827135	-0.85111
'HIStex_REV'	'L-histidine transport via diffusion (extracellular to periplasm) (reversible)'	0.0168388	0.00187175	-0.954064	-0.888843
'ASNt2rpp_REV'	'L-asparagine reversible transport via proton symport (periplasm) (reversible)'	0.0235744	0.00262045	-0.954064	-0.888843
'DHAtpp_REV'	'Dihydroxyacetone transport via facilitated diffusion (periplasm) (reversible)'	1000	0.000520448	-6.28362	-0.999999
'CO2tpp_REV'	'CO2 transporter via diffusion (periplasm) (reversible)'	0.0392906	0.00436741	-0.954064	-0.888843
'EX_ch4_e_REV'	'EX ch4 LPAREN e RPAREN (reversible)'	0.0392906	0.00436741	-0.954064	-0.888843
'ACACt2pp_REV'	'Acetoacetate transport via proton symport (periplasm) (reversible)'	0.0235744	0.00262045	-0.954064	-0.888843
'GALCTtex_REV'	'D-galactarte transport via diffusion (extracellular to periplasm) (reversible)'	0.0168388	0.00187175	-0.954064	-0.888843
'GALtex_REV'	'D-galactose transport via diffusion (extracellular to periplasm) (reversible)'	0.117872	0.0131022	-0.954064	-0.888843
'EX_fruur_e_REV'	'D-Fructuronate exchange (reversible)'	0.117872	0.0131022	-0.954064	-0.888843
'URIt2pp_copy2_REV'	' (reversible)'	0.0392906	0.00436741	-0.954064	-0.888843
'TYRt2rpp_REV'	'L-tyrosine reversible transport via proton symport (periplasm) (reversible)'	0.117872	0.0131022	-0.954064	-0.888843
'EX_gtp_e_REV'	'GTP exchange (reversible)'	0.00519276	0.000637551	-0.910883	-0.877223
'EX_xylu__L_e_REV'	'L-Xylulose exchange (reversible)'	0.0235744	0.00262045	-0.954064	-0.888843
'EX_octa_e_REV'	'Octanoate (n-C8:0) exchange (reversible)'	0.0589359	0.00655112	-0.954064	-0.888843
'EX_agm_e_REV'	'Agmatine exchange (reversible)'	0.0392906	0.00436741	-0.954064	-0.888843
'EX_ala_B_e_REV'	'Beta-Alanine exchange (reversible)'	0.0589359	0.00655112	-0.954064	-0.888843
'EX_ascb__L_e_REV'	'L-Ascorbate exchange (reversible)'	0.00233035	0.000270149	-0.935817	-0.884074
'AKGt2rpp_REV'	'2-oxoglutarate reversible transport via symport (periplasm) (reversible)'	0.0235744	0.00262045	-0.954064	-0.888843
'EX_so3_e_REV'	'Sulfite exchange (reversible)'	0.0313821	0.00436741	-0.856458	-0.860831
'EX_ca2_e_REV'	'Calcium exchange (reversible)'	1000	0.739859	-3.13085	-0.99926
'TARTRt7pp_REV'	'Tartrate/succinate antiporter (periplasm) (reversible)'	1000	0.739859	-3.13085	-0.99926
'SUCFUMtpp_REV'	'Succinate:fumarate antiporter (periplasm) (reversible)'	6.4606e-09	4.08525e-09	-0.199054	-0.367666
'ACMANAtex_REV'	'N-acetyl-D-mannosamine transport via diffusion (extracellular to periplasm) (reversible)'	0.0235808	0.00262691	-0.953114	-0.8886
'ACALDtex_REV'	'Acetaldehyde transport via diffusion (extracellular to periplasm) (reversible)'	1.40062e-10	8.85348e-11	-0.199205	-0.367886
'ACtex_REV'	'Acetate transport via diffusion (extracellular to periplasm) (reversible)'	1.40014e-10	8.85348e-11	-0.199055	-0.367669
'12PPDStex_REV'	'(S)-Propane-1,2-diol transport via diffusion (extracellular to periplasm) (reversible)'	0.014734	0.00163778	-0.954064	-0.888843
'O2tpp_REV'	'O2 transport via diffusion (periplasm) (reversible)'	0.0235744	0.00262045	-0.954064	-0.888843
'H2Otex_REV'	'H2O transport via diffusion (extracellular to periplasm) (reversible)'	0.00130969	0.00014558	-0.954064	-0.888843
'H2tex_REV'	'Hydrogen transport via diffusion (extracellular to periplasm) (reversible)'	0.014734	0.00137985	-1.02849	-0.906349
'Htex_REV'	'Proton transport via diffusion (extracellular to periplasm) (reversible)'	0.0294679	0.00327556	-0.954064	-0.888843
'GUAtex_REV'	'Guanine transport via diffusion (extracellular to periplasm) (reversible)'	0.0294679	0.00327556	-0.954064	-0.888843
'GLYC3Ptex_REV'	'Glycerol-3-phosphate transport via diffusion (extracellular to periplasm) (reversible)'	0.0294679	0.00327556	-0.954064	-0.888843
'GLYCtex_REV'	'Glycerol transport via diffusion (extracellular to periplasm) (reversible)'	0.00736699	0.00081889	-0.954064	-0.888843
'EX_galctn__D_e_REV'	'D-Galactonate exchange (reversible)'	0.014734	0.00163778	-0.954064	-0.888843
'EX_ser__D_e_REV'	'D-Serine exchange (reversible)'	0.0198036	0.00302543	-0.815957	-0.847228
'EX_dad_2_e_REV'	'Deoxyadenosine exchange (reversible)'	0.00955823	0.00113932	-0.92373	-0.880802
'EX_ocdca_e_REV'	'Octadecanoate (n-C18:0) exchange (reversible)'	0.00955823	0.00113932	-0.92373	-0.880802
'EX_nac_e_REV'	'Nicotinate exchange (reversible)'	0.014734	0.00163778	-0.954064	-0.888843
'EX_adn_e_REV'	'Adenosine exchange (reversible)'	0.00955823	0.00113932	-0.92373	-0.880802
'EX_acac_e_REV'	'Acetoacetate exchange (reversible)'	0.00955823	0.00113932	-0.92373	-0.880802
'EX_mg2_e_REV'	'Mg exchange (reversible)'	0.00477912	0.000569662	-0.92373	-0.880802
'DM_amob_c_REV'	'Sink needed to allow S-Adenosyl-4-methylthio-2-oxobutanoate to leave system (reversible)'	0.00477912	0.000569662	-0.92373	-0.880802
'EX_mmet_e_REV'	'S-Methyl-L-methionine exchange (reversible)'	0.00477912	0.000569662	-0.92373	-0.880802
'EX_glcur_e_REV'	'D-Glucuronate exchange (reversible)'	0.0163747	0.00327556	-0.698889	-0.799963
'EX_maltpt_e_REV'	'Maltopentaose exchange (reversible)'	0.0191342	0.00398379	-0.681515	-0.791798
'EX_taur_e_REV'	'Taurine exchange (reversible)'	0.00637145	0.000708229	-0.954064	-0.888843
'EX_tartr__L_e_REV'	'L-tartrate exchange (reversible)'	0.0239296	0.00738654	-0.510495	-0.691322
'EX_met__D_e_REV'	'D-Methionine exchange (reversible)'	0.0238445	0.00730145	-0.51398	-0.693789
'EX_gthrd_e_REV'	'Reduced glutathione exchange (reversible)'	0.0539734	0.0374261	-0.159005	-0.306582
'EX_h2s_e_REV'	'Hydrogen sulfide exchange (reversible)'	0.0274667	0.0250265	-0.0404061	-0.0888415
'EX_gbbtn_e_REV'	'Gamma-butyrobetaine exchange (reversible)'	0.0597389	0.00735409	-0.909729	-0.876896
'EX_but_e_REV'	'Butyrate (n-C4:0) exchange (reversible)'	0.0235812	0.00262727	-0.953061	-0.888586
'EX_galur_e_REV'	'D-Galacturonate exchange (reversible)'	0.117872	0.0131022	-0.954064	-0.888843
'EX_idon__L_e_REV'	'L-Idonate exchange (reversible)'	0.00477912	0.000569662	-0.92373	-0.880802
'EX_galct__D_e_REV'	'D-Galactarate exchange (reversible)'	0.00477912	0.000569662	-0.92373	-0.880802
'EX_2ddglcn_e_REV'	'2-Dehydro-3-deoxy-D-gluconate exchange (reversible)'	0.00477912	0.000569662	-0.92373	-0.880802
'EX_g6p_e_REV'	'D-Glucose 6-phosphate exchange (reversible)'	0.00955823	0.00113932	-0.92373	-0.880802
'EX_glyclt_e_REV'	'Glycolate exchange (reversible)'	0.00955823	0.00113932	-0.92373	-0.880802
'EX_ttdca_e_REV'	'Tetradecanoate (n-C14:0) exchange (reversible)'	0.00477912	0.000569662	-0.92373	-0.880802
'EX_rmn_e_REV'	'L-Rhamnose exchange (reversible)'	0.00477912	0.000569662	-0.92373	-0.880802
'EX_glyald_e_REV'	'D-Glyceraldehyde exchange (reversible)'	0.00477912	0.000569662	-0.92373	-0.880802
'EX_fuc__L_e_REV'	'L-Fucose exchange (reversible)'	0.00955823	0.00113932	-0.92373	-0.880802
'EX_dha_e_REV'	'Dihydroxyacetone exchange (reversible)'	0.00240555	0.000267393	-0.954064	-0.888843
'EX_amp_e_REV'	'AMP exchange (reversible)'	0.00256243	0.000284831	-0.954064	-0.888843
'EX_acnam_e_REV'	'N-Acetylneuraminate exchange (reversible)'	0.00261937	0.000291161	-0.954064	-0.888843
'EX_26dap__M_e_REV'	'Meso-2,6-Diaminoheptanedioate exchange (reversible)'	0.00235744	0.000262045	-0.954064	-0.888843
'EX_tmao_e_REV'	'Trimethylamine N-oxide exchange (reversible)'	0.00240555	0.000267393	-0.954064	-0.888843
'EX_zn2_e_REV'	'Zinc exchange (reversible)'	0.0294679	1.31902e-05	-3.3491	-0.999552
'EX_tre_e_REV'	'Trehalose exchange (reversible)'	0.00477912	0.000569662	-0.92373	-0.880802
'EX_sucr_e_REV'	'Sucrose exchange (reversible)'	0.00477912	0.000569662	-0.92373	-0.880802
'EX_fmn_e_REV'	'FMN exchange (reversible)'	0.00256243	0.000284831	-0.954064	-0.888843
'EX_din_e_REV'	'Deoxyinosine exchange (reversible)'	0.00261937	0.000291161	-0.954064	-0.888843
'EX_trp__L_e_REV'	'L-Tryptophan exchange (reversible)'	0.00256243	0.000284831	-0.954064	-0.888843
'EX_fru_e_REV'	'D-Fructose exchange (reversible)'	250.003	0.251632	-2.99718	-0.998993
'EX_ptrc_e_REV'	'Putrescine exchange (reversible)'	0.0108402	0.00353045	-0.487208	-0.674319
'EX_btn_e_REV'	'Biotin exchange (reversible)'	0.0128117	0.00550174	-0.367107	-0.570569
'EX_tyr__L_e_REV'	'L-Tyrosine exchange (reversible)'	0.00256243	0.000262045	-0.990277	-0.897736
'EX_thymd_e_REV'	'Thymidine exchange (reversible)'	0.00235744	0.000262045	-0.954064	-0.888843
'EX_succ_e_REV'	'Succinate exchange (reversible)'	0.002224	0.000247212	-0.954064	-0.888843
'EX_pro__L_e_REV'	'L-Proline exchange (reversible)'	0.00477912	0.000569662	-0.92373	-0.880802
'EX_orn_e_REV'	'Ornithine exchange (reversible)'	0.00955823	0.00113932	-0.92373	-0.880802
'EX_no3_e_REV'	'Nitrate exchange (reversible)'	0.00955823	0.00113932	-0.92373	-0.880802
'EX_leu__L_e_REV'	'L-Leucine exchange (reversible)'	0.00477912	0.000569662	-0.92373	-0.880802
'EX_lac__L_e_REV'	'L-Lactate exchange (reversible)'	0.00477912	0.000569662	-0.92373	-0.880802
'EX_ile__L_e_REV'	'L-Isoleucine exchange (reversible)'	0.00477912	0.000569662	-0.92373	-0.880802
'EX_co2_e_REV'	'carbon dioxide exchange (reversible)'	0.00140324	0.000155979	-0.954064	-0.888843
'EX_man_e_REV'	'D-Mannose exchange (reversible)'	0.00693363	0.00077072	-0.954064	-0.888843
'EX_gln__L_e_REV'	'L-Glutamine exchange (reversible)'	0.0107156	0.00119111	-0.954064	-0.888843
'EX_glcn_e_REV'	'D-Gluconate exchange (reversible)'	0.0107156	0.00119111	-0.954064	-0.888843
'EX_ala__L_e_REV'	'L-Alanine exchange (reversible)'	0.00261937	0.000267393	-0.991048	-0.897917
'EX_akg_e_REV'	'2-Oxoglutarate exchange (reversible)'	0.000175404	1.94974e-05	-0.954064	-0.888843
'BIOMASS_Ec_iML1515_WT_75p37M'	'E. coli biomass objective function (iML1515) - WT - with 75.37 GAM estimate'	0.0392906	0.00436741	-0.954064	-0.888843
'BIOMASS_Ec_iML1515_core_75p37M'	'biomass pseudoreaction'	1000.04	0.00436741	-5.35979	-0.999996
'SUCCt1pp'	'Succinate transport via diffusion in (periplasm)'	1000	0	-18	-1
'FMNt'	'FMN transporter, periplasm'	2.37326e-05	2.63803e-06	-0.954064	-0.888843
'METGLCURtex'	'1-O-methyl-Beta-D-glucuronate via diffusion (extracellular)'	2.37326e-05	2.63803e-06	-0.954064	-0.888843
'EX_4abzglu_e'	'4-aminobenzoyl-glutamate exchange'	0.00477912	0.000569662	-0.92373	-0.880802
'MEPNtex'	'Methylphosphonic acid transport via diffusion (extracellular to periplasm)'	0.00477912	0.000569662	-0.92373	-0.880802
'ADOCBLtonex'	'Adenosylcobalimin transport via ton system (extermal)'	0.00477912	0.000569662	-0.92373	-0.880802
'CS1tex'	'Cesium transport via diffusion'	0.0107156	0.00119111	-0.954064	-0.888843
'URATEtpp'	'Uric acid transporter'	2.37326e-05	2.63803e-06	-0.954064	-0.888843
'EX_sq_e'	'Sulphoquinovose exchange'	2.37326e-05	2.63803e-06	-0.954064	-0.888843
'DHGLYH'	'Dehydroglycine Hydratase'	9.49303e-05	1.05521e-05	-0.954064	-0.888843
'SERtpp'	'L-serine export via facilitated transport'	2.37326e-05	2.63803e-06	-0.954064	-0.888843
'EX_mepn_e'	'Methylphosphonic acid exchange'	0.000175404	1.94974e-05	-0.954064	-0.888843
'4HBZt3pp'	'4-hydroxybenzoate transport out via antiporter'	0.00519276	0.000637551	-0.910883	-0.877223
'FADtex'	'FAD transport, outer membrane'	0.0589359	0.00655112	-0.954064	-0.888843
'FADt'	'FAD transporter, periplasm'	0.00477912	0.000569662	-0.92373	-0.880802
'GLYtpp'	'Glycine transport via facillitated diffusion'	0.00955823	0.00113932	-0.92373	-0.880802
'ILEt2rpp'	'L-isoleucine reversible transport via proton symport (periplasm)'	0.00955823	0.00113932	-0.92373	-0.880802
'INDOLEt2rpp'	'Indole transport via proton symport, reversible (periplasm)'	0.00955823	0.00113932	-0.92373	-0.880802
'INSt3pp'	'Inosine transport out via proton antiport (perisplasm)'	0.00955823	0.00113932	-0.92373	-0.880802
'LEUt3pp'	'L-leucine transport out via proton antiport (periplasm)'	0.00955823	0.00113932	-0.92373	-0.880802
'PItpp'	'Phosphate export via facillated diffusion (periplasm)'	0.002224	0.000247212	-0.954064	-0.888843
'CLtipp'	'Chloride ion transport in via diffusion (periplasm)'	0.002224	0.000247212	-0.954064	-0.888843
'CYSItpp'	'Cystine efflux transport'	0.00955823	0.00113932	-0.92373	-0.880802
'4ABZGLUtr'	'P-aminobenzoyl glutamate:H+ symporter'	0.00955823	0.00113932	-0.92373	-0.880802
'CHOLATEtpp'	'Cholate transport via proton antiport'	0.00955823	0.00113932	-0.92373	-0.880802
'CLBtex'	'Cellobiose transport transport via diffusion extracellular to periplasm '	0.00736699	0.00081889	-0.954064	-0.888843
'FEENTERES'	'Enterochelin Esterase (Fe containing)'	0.014856	0.00175977	-0.926446	-0.881545
'SPMDt3pp'	'Spermidine transport out via proton antiport (periplasm)'	0.00519276	0.000637551	-0.910883	-0.877223
'TRPtipp'	'L-tryptophan transport out (periplasm)'	2.37326e-05	2.63803e-06	-0.954064	-0.888843
'CHTBStex'	'Chitobiose transport via diffusion (extracellular to periplasm)'	0.00733329	0.00109185	-0.827135	-0.85111
'SUCTARTtpp'	'Succinate:D-tartrate antiporter (periplasm)'	0.117972	0.0132026	-0.951121	-0.888087
'TARTt2_3pp'	'D-tartrate transport via proton symport (3 H) (periplasm)'	0.00170829	0.000189887	-0.954064	-0.888843
'PYDAMtex'	'Pyridoxamine transport via diffusion (extracellular)'	0.00156122	0.00017354	-0.954064	-0.888843
'PYDXNtpp'	'Pyridoxine import'	0.00133945	0.000148889	-0.954064	-0.888843
'SUCMALtpp'	'Succinate:malate antiporter (periplasm)'	0.00453353	0.000503932	-0.954064	-0.888843
'SUCASPtpp'	'Succinate:aspartate antiporter (periplasm)'	0.00206793	0.000229864	-0.954064	-0.888843
'PYDXtpp'	'Pyridoxal import'	0.000747601	8.31009e-05	-0.954064	-0.888843
'DMSOtpp'	'Dimethyl sulfoxide transport via diffusion (periplasm)'	0.000583524	6.48626e-05	-0.954064	-0.888843
'EX_arbt_e'	'Arbutin exchange'	0.0138002	0.00328132	-0.623838	-0.762227
'ARBTtex'	'Arbutin transport via diffusion (extracellular to periplasm)'	0.0108043	0.00127983	-0.926446	-0.881545
'BTNtex'	'Biotin transport via diffusion (extracellular to periplasm)'	0.0108043	0.00127983	-0.926446	-0.881545
'RFAMPtpp'	'Rifampin transport via TolC system'	5.00108e-10	2000	12.602	3.99912e+12
'SELGTHR2'	'Selenate glutathione reductase II'	0.0294679	0.00327556	-0.954064	-0.888843
'SLNTtex'	'Selenite transport via diffusion (extracellular to periplasm)'	4.55645e-08	2.88118e-08	-0.199057	-0.367671
'FESR'	'Iron-sulfur cluster repair'	0.00103396	0.000114932	-0.954064	-0.888843
'TTRCYCtex'	'Tetracycline transport via diffusion (extracellular to periplasm)'	0.0465276	0.0205596	-0.354695	-0.558119
'5MTRtpp'	'5-Methylthio-D-ribose transport via proton symport (periplasm)'	0.0465276	0.0205596	-0.354695	-0.558119
'CDGS'	'7-deaza-7-carboxyguanine synthase'	1.33813e-08	8.43056e-09	-0.200643	-0.369976
'SELtex'	'Selenate transport via diffusion (extracellular to periplasm)'	1000.01	1.01013	-2.99563	-0.99899
'MEOHtrpp'	'Methanol reversible transport via diffusion (periplasm)'	0.015322	0.00658569	-0.366713	-0.57018
'FESD2s'	'Iron-sulfur cluster damage (nitrous oxide, spontaneous)'	0.00240555	0.000267393	-0.954064	-0.888843
'EX_fusa_e'	'Fusidic acid exchange'	0.00107156	0.000119111	-0.954064	-0.888843
'FESD1s'	'Iron-sulfur cluster damage (peroxide, spontaneous)'	0.000227846	0.000227806	-7.53553e-05	-0.000173497
'DM_4crsol_c'	'Sink needed to allow p-Cresol to leave system'	0.000227846	0.000227806	-7.53553e-05	-0.000173497
'EX_mincyc_e'	'Minocycline exchange'	0.000227846	0.000227806	-7.53552e-05	-0.000173497
'EX_ttrcyc_e'	'Tetracycline exchange'	0.000227846	0.000227806	-7.53552e-05	-0.000173497
'EX_LalaLglu_e'	'L-alanine-L-glutamate exchange'	0.000810115	9.00497e-05	-0.954064	-0.888843
'LALALGLUtpp'	'L-alanyl-L-glutamate transport in via proton symport (periplasm)'	0.000800035	8.89292e-05	-0.954064	-0.888843
'LALADGLUtex'	'L-alanyl-D-glutamate transport via diffusion (extracellular to periplasm)'	0.00133945	0.000148889	-0.954064	-0.888843
'CMtex'	'Chloramphenicol transport via diffusion (extracellular to periplasm)'	0.0147716	0.00335081	-0.644277	-0.773158
'I4FE4SR'	'ISC [4Fe-4S] Reduction'	0.0294679	0.00327556	-0.954064	-0.888843
'ETOHtrpp'	'Ethanol reversible transport via diffusion (periplasm)'	0.0294679	0.00327556	-0.954064	-0.888843
'DOXRBCNtpp'	'Doxorubicin transport via TolC system'	0.0294679	0.00327556	-0.954064	-0.888843
'DOXRBCNtex'	'Doxorubicin transport via diffusion (extracellular to periplasm)'	0.00906706	0.00100786	-0.954064	-0.888843
'SELGTHR3'	'Selenate glutathione reductase III'	0.00066657	7.40937e-05	-0.954064	-0.888843
'SELGTHR'	'Selenate glutathione reductase'	0.00166017	0.000184539	-0.954064	-0.888843
'FE3abcpp'	'Iron (III) transport via ABC system (periplasm to cytoplasm)'	0.002224	0.000247212	-0.954064	-0.888843
'ETHAt2pp'	'Ethanolamine transport in via proton symport'	0.000358455	3.98446e-05	-0.954064	-0.888843
'CD2tpp'	'Cadmium (+2) transport in via permease (no H+)'	0.0027412	0.000304703	-0.954064	-0.888843
'FE2t3pp'	'Iron (Fe+2) transport out via proton antiport (periplasm)'	0.00327422	0.000363951	-0.954064	-0.888843
'CU2tpp'	'Copper transport in via permease (no H+)'	0.00128122	0.000142416	-0.954064	-0.888843
'NI2t3pp'	'Nickle (Ni+2) transport out via proton antiport (periplasm)'	1000.03	37.3436	-1.4278	-0.962658
'MG2tpp'	'Magnesium (+2) transport in via diffusion'	0.00256846	0.000308288	-0.920716	-0.879972
'MN2tpp'	'Manganese transport in via permease (no H+)'	0.014734	0.00163778	-0.954064	-0.888843
'FE2tpp'	'Iron (+2) transport in via permease (no H+)'	1000	2000	0.30103	1
'DALAt2pp'	'D-alanine transport in via proton symport (periplasm)'	0.000810115	0.00247227	0.48455	2.05176
'BALAt2pp'	'Beta-alanine transport in via proton symport (periplasm)'	0.00261937	0.000291161	-0.954064	-0.888843
'GLYt2pp'	'Glycine transport in via proton symport (periplasm)'	0.000715821	7.95682e-05	-0.954064	-0.888843
'LYSt2pp'	'L-lysine transport in via proton symport (periplasm)'	0.00990178	0.00151271	-0.815957	-0.847228
'CAt6pp'	'Calcium / sodium antiporter (1:1)'	0.00955823	0.00113932	-0.92373	-0.880802
'23DAPPAt2pp'	'2,3-diaminopropionate transport in via proton symport'	0.0392906	0.00436741	-0.954064	-0.888843
'COBALT2t3pp'	'Cobalt (Co+2) transport out via proton antiport (periplasm)'	0.0589359	0.00655112	-0.954064	-0.888843
'DM_aacald_c'	'Sink needed to allow aminoacetaldehyde to leave system'	0.0238956	0.00294163	-0.909729	-0.876896
'FRULYSt2pp'	'Fructoselysine transport via proton symport (periplasm)'	0.0235744	0.00262045	-0.954064	-0.888843
'CHLt2pp'	'Choline transport via proton symport (periplasm)'	6.4606e-09	4.08525e-09	-0.199054	-0.367666
'EX_crn__D_e'	'D-carnitine exchange'	0.117872	0.0131022	-0.954064	-0.888843
'EX_tungs_e'	'Tungstate exchange'	1.33813e-08	8.43056e-09	-0.200643	-0.369976
'LYSt3pp'	'L-lysine transport out via proton antiport (cytoplasm to periplasm)'	0.015322	0.00658569	-0.366713	-0.57018
'ALAt4pp'	'L-alanine transport in via sodium symport (periplasm)'	0.00126744	0.000140884	-0.954064	-0.888843
'12DGR181tipp'	'1,2 diacylglycerol transport via flipping (periplasm to cytoplasm, n-C18:1)'	0.00955823	0.00113932	-0.92373	-0.880802
'12DGR161tipp'	'1,2 diacylglycerol transport via flipping (periplasm to cytoplasm, n-C16:1)'	0.00990178	0.00151271	-0.815957	-0.847228
'CGLYabcpp'	'L-Cysteinylglycine (Cys-Gly) transport via ABC system (periplasm)'	0.00142875	0.000158815	-0.954064	-0.888843
'DSBAO1'	'DsbA protein reoxidation reaction (aerobic)'	0.117872	0.0131022	-0.954064	-0.888843
'GTHOXtex'	'Glutathione (ox) transport via diffusion (extracellular to periplasm)'	0.0252582	0.00280762	-0.954064	-0.888843
'2AGPG120tipp'	'2-Acyl-sn-glycero-3-phosphoglycerol (n-C12:0) transporter via facilitated diffusion (periplasm)'	0.00523875	0.000582322	-0.954064	-0.888843
'2AGPA181tipp'	'2-Acyl-sn-glycero-3-phosphatidate (n-C18:1) transporter via facilitated diffusion (periplasm)'	0.0392906	0.00436741	-0.954064	-0.888843
'2AGPA161tipp'	'2-Acyl-sn-glycero-3-phosphatidate (n-C16:1) transporter via facilitated diffusion (periplasm)'	0.00176938	0.000206334	-0.93325	-0.883386
'2AGPE140tipp'	'2-Acyl-sn-glycero-3-phosphoethanolamine (n-C14:0) transporter via facilitated diffusion (periplasm)'	0.00142875	0.000158815	-0.954064	-0.888843
'2AGPA141tipp'	'2-Acyl-sn-glycero-3-phosphatidate (n-C14:1) transporter via facilitated diffusion (periplasm)'	0.00233035	0.000270149	-0.935817	-0.884074
'2AGPA180tipp'	'2-Acyl-sn-glycero-3-phosphatidate (n-C18:0) transporter via facilitated diffusion (periplasm)'	0.000714374	7.94075e-05	-0.954064	-0.888843
'2AGPA160tipp'	'2-Acyl-sn-glycero-3-phosphatidate (n-C16:0) transporter via facilitated diffusion (periplasm)'	0.0471933	0.0105382	-0.651113	-0.776701
'EX_progly_e'	'L-Prolinylglycine exchange'	0.00327422	0.000363951	-0.954064	-0.888843
'PROGLYtex'	'L-Prolinylglycine transport via diffusion (extracellular to periplasm)'	0.0589359	0.00655112	-0.954064	-0.888843
'PPALtpp'	'Propanal transport via channel (periplasm)'	0.0589359	0.00655112	-0.954064	-0.888843
'GAMAN6Ptex'	'D-glucosamine 6-phosphate transport via diffusion (extracellular to periplasm)'	0.0294679	0.00327556	-0.954064	-0.888843
'12PPDRtex'	'(R)-Propane-1,2-diol transport via diffusion (extracellular to periplasm)'	0.00240555	0.000267393	-0.954064	-0.888843
'SO4t2pp'	'Sulfate transport in via proton symport (periplasm to cytoplasm)'	0.0027412	0.000304703	-0.954064	-0.888843
'12PPDRtpp'	'(R)-Propane-1,2-diol facilitated transport (periplasm)'	3.90425e-06	2.46877e-06	-0.199057	-0.367671
'EX_dtmp_e'	'DTMP exchange'	0.000974147	0.000108283	-0.954064	-0.888843
'EX_alaala_e'	'D-Alanyl-D-alanine exchange'	0.00130969	0.00014558	-0.954064	-0.888843
'HG2t3pp'	'Mercury (Hg+2) transport out via proton antiport (periplasm)'	0.00142875	0.000158815	-0.954064	-0.888843
'PDX5PO2'	'Pyridoxine 5''-phosphate oxidase (anaerboic'	0.00102497	0.000113932	-0.954064	-0.888843
'DM_oxam_c'	'Sink needed to allow oxamate to leave system'	0.0010635	0.000118216	-0.954064	-0.888843
'DSBGGT'	'DsbG:glutathione thiotransferase'	0.0392906	0.00436741	-0.954064	-0.888843
'DHORDfum'	'Fumarate dependent DHORD'	0.0589359	0.00655112	-0.954064	-0.888843
'NAt3pp'	'Sodium transport out via proton antiport (cytoplasm to periplasm)'	0.117872	0.0131022	-0.954064	-0.888843
'EX_g1p_e'	'D-Glucose 1-phosphate exchange'	0.0294679	0.00327556	-0.954064	-0.888843
'EX_pydx_e'	'Pyridoxal exchange'	0.0168388	0.00187175	-0.954064	-0.888843
'MELIBt3ipp'	'Melibiose transport in via antiport (periplasm)'	0.00547762	0.000608874	-0.954064	-0.888843
'UDCPPtppi'	'Undecaprenyl phosphate transport (cytoplasm to periplasm)'	0.0235744	0.00262045	-0.954064	-0.888843
'EX_maltttr_e'	'Maltotetraose exchange'	0.00250791	0.000278771	-0.954064	-0.888843
'EX_n2o_e'	'Nitrous oxide exchange'	0.0590864	0.0134033	-0.644277	-0.773158
'EX_tsul_e'	'Thiosulfate exchange'	0.0982265	0.0109185	-0.954064	-0.888843
'FEOXAMtonex'	'Ferroxamine transport via ton system (extracellular)'	0.00955823	0.00113932	-0.92373	-0.880802
'23DAPPAtex'	'2,3-diaminopropionate transport via diffusion'	0.00955823	0.00113932	-0.92373	-0.880802
'AACTOOR'	'Aminoacetone:oxygen oxidoreductase(deaminating)(flavin-containing)'	0.0298116	0.00338716	-0.944549	-0.886381
'FE3DHBZStonex'	'Ferric 2,3-dihydroxybenzoylserine transport via ton system (extracellular)'	0.0186113	0.00206877	-0.954064	-0.888843
'EX_manglyc_e'	'2(alpha-D-Mannosyl)-D-glycerate exchange'	0.00955823	0.00113932	-0.92373	-0.880802
'EX_dgmp_e'	'DGMP exchange'	0.0589359	0.00655112	-0.954064	-0.888843
'CLPNH181pp'	'Cardiolipin hydrolase (periplasm, n-C18:1)'	0.000751574	8.35424e-05	-0.954064	-0.888843
'CLPNH161pp'	'Cardiolipin hydrolase (periplasm, n-C16:1)'	0.0235744	0.00262045	-0.954064	-0.888843
'12DGR141tipp'	'1,2 diacylglycerol transport via flipping (periplasm to cytoplasm, n-C14:1)'	0.118619	0.0131853	-0.954064	-0.888843
'2AGPG181tipp'	'2-Acyl-sn-glycero-3-phosphoglycerol (n-C18:1) transporter via facilitated diffusion (periplasm)'	0.118455	0.0131671	-0.954064	-0.888843
'2AGPG141tipp'	'2-Acyl-sn-glycero-3-phosphoglycerol (n-C14:1) transporter via facilitated diffusion (periplasm)'	0.0235744	0.00262045	-0.954064	-0.888843
'2AGPG140tipp'	'2-Acyl-sn-glycero-3-phosphoglycerol (n-C14:0) transporter via facilitated diffusion (periplasm)'	2.23045e-05	2.23006e-05	-7.53553e-05	-0.000173497
'CYStpp'	'L-cysteine export via facilitated transport'	0.00187098	0.000207972	-0.954064	-0.888843
'SO2tpp'	'SO2 transport via diffusion (periplasm)'	0.0784552	0.0109185	-0.856458	-0.860831
'HOMtex'	'L-homoserine transport via diffusion (extracellular to periplasm)'	1.0411e-07	6.5832e-08	-0.199057	-0.367672
'EX_dimp_e'	'DIMP exchange'	0.0170619	0.00209481	-0.910883	-0.877223
'O2Stex'	'Superoxide anion transport via diffusion (extracellular to periplasm)'	0.0260809	0.00436741	-0.776099	-0.832544
'MNt2pp'	'Manganese (Mn+2) transport in via proton symport (periplasm)'	0.0589359	0.00655112	-0.954064	-0.888843
'SKMtex'	'Shikimate transport via diffusion (extracellular to periplasm)'	0.0115692	0.00331013	-0.543459	-0.713885
'ZN2t3pp'	'Zinc (Zn+2) transport out via proton antiport (periplasm)'	0.0093176	0.00221472	-0.623986	-0.762308
'CUt3'	'Copper transport out via proton antiport'	0.0100315	0.00229407	-0.64076	-0.771314
'G1Ptex'	'D-glucose 1-phosphate transport via diffusion'	0.0442558	0	-13.646	-1
'UMPtex'	'UMP transport via diffusion (extracellular to periplasm)'	0.0281067	0.00655463	-0.632261	-0.766795
'EX_g3ps_e'	'Glycerophosphoserine exchange'	0.00182843	0.000209636	-0.940612	-0.885346
'EX_g3pi_e'	'Sn-Glycero-3-phospho-1-inositol exchange'	0.00103396	0.000114932	-0.954064	-0.888843
'EX_g3pg_e'	'Glycerophosphoglycerol exchange'	0.117872	0.0131022	-0.954064	-0.888843
'EX_fe3dhbzs_e'	'Ferric 2,3-dihydroxybenzoylserine exchange'	0.0589359	0.00655112	-0.954064	-0.888843
'EX_14glucan_e'	'1,4-alpha-D-glucan exchange'	0.00327422	0.000363951	-0.954064	-0.888843
'EX_tyrp_e'	'Phosphotyrosine exchange'	0.00637145	0.000708229	-0.954064	-0.888843
'EX_cyan_e'	'Hydrogen cyanide exchange'	0.00637145	0.000708229	-0.954064	-0.888843
'EX_acgal1p_e'	'N-Acetyl-D-galactosamine 1-phosphate exchange'	500.485	1000.46	0.30081	0.998986
'G3PGtex'	'Glycerophoglycerol transport via diffusion (extracellular to periplasm)'	0.00146425	0.000162761	-0.954064	-0.888843
'EX_dms_e'	'Dimethyl sulfide exchange'	0.00471487	0.000524089	-0.954064	-0.888843
'EX_so2_e'	'Sulfur dioxide exchange'	0.00124076	0.000137918	-0.954064	-0.888843
'CYSDtex'	'D-cysteine transport via diffusion (extracellular to periplasm)'	0.00231121	0.000256907	-0.954064	-0.888843
'EX_LalaDgluMdapDala_e'	'L-alanine-D-glutamate-meso-2,6-diaminoheptanedioate-D-alanine exchange'	0.0294679	0.00327556	-0.954064	-0.888843
'THRt2pp'	'L-threonine efflux transport via proton antiport (periplasm)'	0.000810115	9.00497e-05	-0.954064	-0.888843
'EX_hom__L_e'	'L-Homoserine exchange'	0.000810115	9.00497e-05	-0.954064	-0.888843
'EX_dopa_e'	'Dopamine exchange'	0.0124076	0.00137918	-0.954064	-0.888843
'EX_arbtn_e'	'Aerobactin minus Fe3 exchange'	0.0027412	0.000304703	-0.954064	-0.888843
'EX_acser_e'	'O-Acetyl-L-serine exchange'	0.0294679	0.00327556	-0.954064	-0.888843
'EX_cys__D_e'	'D-Cysteine exchange'	2000	69.153	-1.46122	-0.965424
'EX_ag_e'	'Silver exchange'	0.0108043	0.00127983	-0.926446	-0.881545
'EX_skm_e'	'Shikimate exchange'	0.0294679	0.00327556	-0.954064	-0.888843
'EX_3cmp_e'	'3''-cmp exchange'	1.33774	0.000364885	-3.56422	-0.999727
'EX_23ccmp_e'	'2'',3''-Cyclic CMP exchange'	9.49303e-05	1.05521e-05	-0.954064	-0.888843
'EX_dcmp_e'	'DCMP exchange'	9.49303e-05	1.05521e-05	-0.954064	-0.888843
'EX_gal1p_e'	'Alpha-D-Galactose 1-phosphate exchange'	4.46045e-09	2.82047e-09	-0.199057	-0.367671
'EX_o2_e'	'oxygen exchange'	0.0364722	0.0089355	-0.610843	-0.755005
'G6Pt6_2pp'	'Glucose-6-phosphate transport via phosphate antiport (periplasm)'	1.34813e-08	8.43694e-09	-0.203547	-0.374175
'EX_orot_e'	'Orotate exchange'	0.0392906	0.00436741	-0.954064	-0.888843
'EX_gsn_e'	'Guanosine exchange'	0.0707231	0.0155917	-0.656669	-0.779539
'EX_pydxn_e'	'Pyridoxine exchange'	5.18422e-05	5.7626e-06	-0.954064	-0.888843
'EX_thrp_e'	'L-Threonine O-3-phosphate exchange'	0.0186113	0.00206877	-0.954064	-0.888843
'EX_glcur1p_e'	'D-Glucuronate 1-phosphate exchange'	0.0294679	0.00327556	-0.954064	-0.888843
'CLtex'	'Chloride (Cl-1) transport via diffusion (extracellular to periplasm)'	1000	3.68581	-2.43347	-0.996314
'FECRMUtex'	'Ferrichrome (minus Fe) secretion (to extracellular)'	0.014734	0.00163778	-0.954064	-0.888843
'EX_galt_e'	'Galactitol exchange'	0.014734	0.00163778	-0.954064	-0.888843
'EX_pppn_e'	'Phenylpropanoate exchange'	0.014734	0.00163778	-0.954064	-0.888843
'EX_12ppd__S_e'	'(S)-Propane-1,2-diol exchange'	0.0294679	0.00327556	-0.954064	-0.888843
'EX_dmso_e'	'Dimethyl sulfoxide exchange'	0.00294679	0.000327556	-0.954064	-0.888843
'EX_na1_e'	'Sodium exchange'	0.00256846	0.000308288	-0.920716	-0.879972
'EX_k_e'	'K+ exchange'	0.00256846	0.000308288	-0.920716	-0.879972
'EX_his__L_e'	'L-Histidine exchange'	1.34813e-08	8.51702e-09	-0.199445	-0.368235
'EX_etoh_e'	'Ethanol exchange'	0.000701618	7.79895e-05	-0.954064	-0.888843
'EX_csn_e'	'Cytosine exchange'	4.46045e-09	2.82047e-09	-0.199057	-0.367671
'EX_cmp_e'	'CMP exchange'	0.00982265	0.00109185	-0.954064	-0.888843
'EX_halipa_e'	'Hepta-acylated KDO(2)-lipid (A) exchange'	0.0392906	0.00436741	-0.954064	-0.888843
'H2St1pp'	'H2s transport (periplasm)'	1000	3.68581	-2.43347	-0.996314
'EX_uri_e'	'Uridine exchange'	0.00491132	0.000545926	-0.954064	-0.888843
'EX_thr__L_e'	'L-Threonine exchange'	0.00491132	0.000545926	-0.954064	-0.888843
'EX_phe__L_e'	'L-Phenylalanine exchange'	0.0392906	0.00436741	-0.954064	-0.888843
'EX_mobd_e'	'Molybdate exchange'	0.014734	0.00163778	-0.954064	-0.888843
'EX_inost_e'	'Myo-Inositol exchange'	0.0010635	0.000118216	-0.954064	-0.888843
'EX_gam_e'	'D-Glucosamine exchange'	0.00624723	0.00327556	-0.280402	-0.475678
'HPPPNt2rpp'	'3-(3-hydroxyphenyl)propionate transport via proton symport, reversible (periplasm)'	0.000715821	7.95682e-05	-0.954064	-0.888843
'EX_pnto__R_e'	'(R)-Pantothenate exchange'	0.0390407	0.0179786	-0.336761	-0.53949
'4PEPTtex'	'LalaDgluMdapDala (pentapeptide) transport via diffusion (extracellular to periplasm)'	0.00491132	0.000545926	-0.954064	-0.888843
'EX_glyc2p_e'	'Glycerol 2-phosphate exchange'	0.00736699	0.00081889	-0.954064	-0.888843
'EX_r5p_e'	'Alpha-D-Ribose 5-phosphate exchange'	0.014734	0.00163778	-0.954064	-0.888843
'FORt2pp'	'Formate transport via proton symport (uptake only, periplasm)'	0.00256846	0.000308288	-0.920716	-0.879972
'EX_ddca_e'	'Dodecanoate (n-C12:0) exchange'	0.0294679	0.00327556	-0.954064	-0.888843
'EX_nh4_e'	'Ammonia exchange'	0.00693363	0.00077072	-0.954064	-0.888843
'OMCDC'	'2-Oxo-4-methyl-3-carboxypentanoate decarboxylation'	0.0026789	0.000297778	-0.954064	-0.888843
'H2Stex'	'H2s transport via diffusion (extracellular to periplasm)'	0.0294679	0.00327556	-0.954064	-0.888843
'ASO3t8pp'	'Arsenite efflux via ATP hydrolysis (periplasm)'	0.0106948	0.00163778	-0.814919	-0.846863
'ACNAMtex'	'N-acetylneuraminate transport via diffusion (extracellular to periplasm)'	0.0364722	0.0089355	-0.610843	-0.755005
'ACACtex'	'Acetoacetate transport via diffusion (extracellular to periplasm)'	0.00523875	0.000582322	-0.954064	-0.888843
'EX_no2_e'	'Nitrite exchange'	0.00103396	0.000114932	-0.954064	-0.888843
'NMNN'	'NMN nucleosidase'	0.00695715	0.00163778	-0.628176	-0.764591
'EX_mal__L_e'	'L-Malate exchange'	2.0004e-07	2.00005e-07	-7.59234e-05	-0.000174805
'EX_asn__L_e'	'L-Asparagine exchange'	0.01011	0.00280031	-0.557546	-0.723016
'ETOHtex'	'Ethanol transport via diffusion (extracellular to periplasm)'	0.0106948	0.00109185	-0.991011	-0.897909
'DHAtex'	'Dihydroxyacetone transport via diffusion (extracellular to periplasm)'	998.976	2.60181	-2.58428	-0.997396
'EX_mnl_e'	'D-Mannitol exchange'	0.0294679	0.00327556	-0.954064	-0.888843
'NADPPPS'	'NADP phosphatase'	0.00035291	3.92282e-05	-0.954064	-0.888843
'HG2tex'	'Mercury (Hg+2) transport via diffusion (extracellular to periplasm)'	0.0392906	0.00436741	-0.954064	-0.888843
'PTRCORNt7pp'	'Putrescine/ornithine antiporter (periplasm)'	0.014734	0.00163778	-0.954064	-0.888843
'PPPNt2rpp'	'3-phenylpropionate transport via proton symport, reversible (periplasm)'	0.014734	0.00163778	-0.954064	-0.888843
'XANt2pp'	'Xanthine transport in via proton symport (periplasm)'	0.014734	0.00163778	-0.954064	-0.888843
'UREAtpp'	'Urea transport via facilitate diffusion (periplasm)'	0.014734	0.00163778	-0.954064	-0.888843
'HYPOE'	'Hypothetical enyme'	0.014734	0.00163778	-0.954064	-0.888843
'EX_glcr_e'	'D-Glucarate exchange'	2.23045e-05	2.23006e-05	-7.53553e-05	-0.000173497
'EX_hdca_e'	'Hexadecanoate (n-C16:0) exchange'	0.00642937	0.000714667	-0.954064	-0.888843
'XTSNtex'	'Xanthosine transport via diffusion (extracellular to periplasm)'	0.0298583	0.00366592	-0.910883	-0.877223
'EX_ala__D_e'	'D-Alanine exchange'	0.0294679	0.00115983	-1.40496	-0.960641
'GLCRt2rpp'	'D-glucarate transport via proton symport, reversible (periplasm)'	0.0384745	0.00428954	-0.952763	-0.88851
'GLCNt2rpp'	'D-gluconate transport via proton symport, reversible (periplasm)'	1.73517e-07	2000	10.0617	1.15262e+10
'GALURt2rpp'	'D-galacturonate transport via proton symport, reversible (periplasm)'	0.00107156	0.000119111	-0.954064	-0.888843
'DIMPtex'	'DIMP transport via diffusion (extracellular to periplasm)'	0.0294679	0.00327556	-0.954064	-0.888843
'FALGTHLs'	'Formaldehyde glutathione ligase (spontaneous)'	0.014734	0.00163778	-0.954064	-0.888843
'COBALT2tex'	'Cobalt (Co+2) transport via diffusion (extracellular to periplasm)'	0.00491132	0.000545926	-0.954064	-0.888843
'HISt2rpp'	'L-histidine reversible transport via proton symport (periplasm)'	0.0294679	0.00327556	-0.954064	-0.888843
'GLYCtpp'	'Glycerol transport via channel (periplasm)'	0.0707231	0.00786134	-0.954064	-0.888843
'GLYCLTt4pp'	'Glycolate transport via sodium symport (periplasm)'	0.117872	0.0131022	-0.954064	-0.888843
'GLYC3Pt6pp'	'Glycerol-3-phosphate : phosphate antiporter (periplasm)'	0.0295042	0.00404681	-0.86277	-0.862839
'EX_hacolipa_e'	'Hepta-acylated core oligosaccharide lipid A (E. coli) exchange'	0.00256846	0.000308288	-0.920716	-0.879972
'EX_enlipa_e'	'Phosphoethanolamine KDO(2)-lipid (A) exchange'	0.0442558	0.00771823	-0.758453	-0.8256
'GLYCAtex'	'D-glycerate transport via diffusion (extracellular to periplasm)'	0.00802114	0.00109185	-0.866072	-0.863878
'GLYCAt2rpp'	'D-glycerate transport via proton symport, reversible (periplasm)'	0.00736699	0.00081889	-0.954064	-0.888843
'O16AUNDtpp'	'O16 antigen (flippase, cytoplasm to periplasm)'	0.00261937	0.000291161	-0.954064	-0.888843
'ECAtpp'	'Enterobacterial common antigen transferase (flippase, cytoplasm to periplasm)'	0.0196453	0.00382149	-0.711026	-0.805476
'FRUURtex'	'D-fructuronate transport via diffusion (extracellular)'	0.00215195	0.000254412	-0.927295	-0.881776
'METOX2s'	'Methionine oxidation 2 (spontaneous)'	0.0027412	0.000304703	-0.954064	-0.888843
'METOX1s'	'Methionine oxidation (spontaneous)'	0.00245566	0.000272963	-0.954064	-0.888843
'EX_frulys_e'	'Fructoselysine exchange'	0.0294679	0.00327556	-0.954064	-0.888843
'GLYALDtpp'	'Glyceraldehyde facilitated diffusion (periplasm)'	0.00642937	0.000714667	-0.954064	-0.888843
'GLUt2rpp'	'L-glutamate transport via proton symport, reversible (periplasm)'	0.00103396	0.000114932	-0.954064	-0.888843
'GLUABUTt7pp'	'4-aminobutyrate/glutamate antiport (periplasm)'	0.0124076	0.00137918	-0.954064	-0.888843
'CD2tex'	'Cadmium (Cd+2) transport via diffusion (extracellular to periplasm)'	0.0124076	0.00137918	-0.954064	-0.888843
'MMETt2pp'	'S-methylmethionine permease (periplasm)'	0.0274667	0.0253312	-0.0351504	-0.077748
'Zn2tex'	'Zinc (Zn+2) transport via diffusion (extracellular to periplasm)'	0.0027412	0.000304703	-0.954064	-0.888843
'MG2tex'	'Magnesium (Mg+2) transport via diffusion (extracellular to periplasm)'	0.014734	0.00163778	-0.954064	-0.888843
'FE3tex'	'Iron (III) transport via diffusion (extracellular to periplasm)'	0.014734	0.00163778	-0.954064	-0.888843
'MMETtex'	'S-methyl-L-methionine transport via diffusion (extracellular to periplasm)'	0.0010635	0.000118216	-0.954064	-0.888843
'FE3HOXtonex'	'Fe(III)hydroxamine transport via ton system (extracellular)'	0.0010635	0.000118216	-0.954064	-0.888843
'ASCBtex'	'L-ascorbate transport via diffusion (extracellular to periplasm)'	1000.02	0.74064	-3.1304	-0.999259
'ARGtex'	'L-arginine transport via diffusion (extracellular to periplasm)'	0.0010635	0.000118216	-0.954064	-0.888843
'ARBtex'	'L-arabinose transport via diffusion (extracellular to periplasm)'	0.0010635	0.000118216	-0.954064	-0.888843
'AMPtex'	'AMP transport via diffusion (extracellular to periplasm)'	0.0010635	0.000118216	-0.954064	-0.888843
'DALAtex'	'D-Alanine transport via diffusion (extracellular to periplasm)'	0.000103684	1.15252e-05	-0.954064	-0.888843
'BALAtex'	'Beta-alanine transport via diffusion (extracellular to periplasm)'	0.000103684	1.15252e-05	-0.954064	-0.888843
'ALAtex'	'L-alanine transport via diffusion (extracellular to periplasm)'	0.00261937	0.000291161	-0.954064	-0.888843
'AGMtex'	'Agmatine transport via diffusion (extracellular to periplasm)'	1.34813e-08	8.43694e-09	-0.203547	-0.374175
'ADNtex'	'Adenosine transport via diffusion (extracellular to periplasm)'	0.0294679	0.00327556	-0.954064	-0.888843
'ADEtex'	'Adenine transport via diffusion (extracellular to periplasm)'	1000	37.3403	-1.42782	-0.96266
'H2O2tex'	'Hydrogen peroxide transport via diffusion (external)'	0.218889	0.0363616	-0.779581	-0.833881
'EX_gmp_e'	'GMP exchange'	0.00256846	0.000308288	-0.920716	-0.879972
'EX_chtbs_e'	'Chitobiose exchange'	0.002224	0.000247212	-0.954064	-0.888843
'EX_cgly_e'	'Cys-Gly exchange'	0.002224	0.000247212	-0.954064	-0.888843
'EX_fecrm_un_e'	'Ferrichrome minus Fe(III) exchange'	0.002224	0.000247212	-0.954064	-0.888843
'EX_enter_e'	'Enterochelin exchange'	0.000103684	1.15252e-05	-0.954064	-0.888843
'ARBTNtonex'	'Aerobactin transport via ton system (extracellular)'	0.014734	0.00163778	-0.954064	-0.888843
'FECRMtonex'	'Ferrichrome transport via ton system (extracellular)'	1000	3.68581	-2.43347	-0.996314
'NO2t2rpp'	'Nitrite transport in via proton symport, reversible (periplasm)'	0.0687585	0.0109185	-0.799163	-0.841205
'NAt3_2pp'	'Sodium proton antiporter (H:NA is 2) (periplasm)'	0.00420971	0.000467937	-0.954064	-0.888843
'EX_fe3hox_un_e'	'Fe(III)hydoxamate, unloaded exchange'	0.00982265	0.00109185	-0.954064	-0.888843
'MELIBt2pp'	'Melibiose transport in via symport (periplasm)'	0.180641	0.0294174	-0.788211	-0.83715
'MAN6Pt6_2pp'	'Mannose-6-phosphate transport via phosphate antiport (periplasm)'	9.49303e-05	1.05521e-05	-0.954064	-0.888843
'L_LACt2rpp'	'L-lactate reversible transport via proton symport (periplasm)'	0.0294679	0.00327556	-0.954064	-0.888843
'LEUabcpp'	'L-leucine transport via ABC system (periplasm)'	0.00420971	0.000467937	-0.954064	-0.888843
'R1PK'	'Ribose 1-phosphokinase'	0.00736699	0.00081889	-0.954064	-0.888843
'NI2tex'	'Nickel transport via diffusion (extracellular to periplasm)'	0.000747601	8.31009e-05	-0.954064	-0.888843
'MOBDtex'	'Molybdate transport via diffusion (extracellular to periplasm)'	0.000715821	7.95682e-05	-0.954064	-0.888843
'G6Ptex'	'Glucose 6-phosphate transport via diffusion (extracellular to periplasm)'	0.000810115	9.00497e-05	-0.954064	-0.888843
'OCDCEAtexi'	'Octadecenoate (n-C18:1) transport via facilitated irreversible diffusion (extracellular to periplasm)'	0.0124076	0.00137918	-0.954064	-0.888843
'OCDCAtexi'	'Octadecanoate transport via facilitated irreversible diffusion (extracellular to periplasm)'	0.00103396	0.000114932	-0.954064	-0.888843
'LYXt2pp'	'L-Lyxose transport via proton symport (periplasm)'	0.0124076	0.00137918	-0.954064	-0.888843
'INSt2pp'	'Inosine transport in via proton symport (periplasm)'	0.00103396	0.000114932	-0.954064	-0.888843
'INDOLEt2pp'	'Indole transport via proton symport, irreversible (periplasm)'	0.00103396	0.000114932	-0.954064	-0.888843
'ILEabcpp'	'L-isoleucine transport via ABC system (periplasm)'	0.000238948	0.000238906	-7.5355e-05	-0.000173496
'IDONt2rpp'	'L-idonate transport via proton symport, reversible (periplasm)'	0.047481	0.00545587	-0.939657	-0.885094
'EX_cd2_e'	'Cadmium exchange'	0.000238948	0.000238906	-7.5355e-05	-0.000173496
'GTPHs'	'GTP amine hydrolysis (spontaneous)'	0.00206793	0.000229864	-0.954064	-0.888843
'ATPHs'	'ATP amine hydrolysis (spontaneous)'	0.0409443	0.00514731	-0.900614	-0.874285
'GUACYC'	'Guanylate cyclase'	0.014734	0.00163778	-0.954064	-0.888843
'HDCAtexi'	'Hexadecanoate transport via facilitated irreversible diffusion (extracellular to periplasm)'	0.00523875	0.000582322	-0.954064	-0.888843
'DDCAtexi'	'Fatty acid (dodecanoate) transport via facilitated irreversible diffusion (extracellular to periplasm)'	0.0160646	0.00163778	-0.991614	-0.89805
'ACGAtex'	'N-Acetyl-D-glucosamine transport via diffusion (extracellular to periplasm)'	0.0160646	0.00296825	-0.733369	-0.81523
'CPGNexs'	'Coprogen Fe-loading reaction (spontaneaous)'	0.00982265	0.00109185	-0.954064	-0.888843
'CPGNUtex'	'Coprogen unloaded secretion (extracellular)'	0.180641	0.03051	-0.772374	-0.831101
'CPGNUtpp'	'Coprogen unloaded secretion'	0.0392906	0.00436741	-0.954064	-0.888843
'CPGNR3'	'Coprogen(Fe(III)) reductase'	0.180641	0.0304215	-0.773635	-0.831591
'CPGNR2'	'Coprogen(Fe(III)) reductase'	0.18195	8.18898	1.65328	44.0067
'TYRPtex'	'Phopho-L-tyrosine transport via diffusion (extracellular to periplasm)'	9.49303e-05	1.05521e-05	-0.954064	-0.888843
'THRPtex'	'Phospho-L-threonine transport via diffusion (extracellular to periplasm)'	9.49303e-05	1.05521e-05	-0.954064	-0.888843
'R5Ptex'	'Ribose 5-phosphate transport via diffusion (extracellular to periplasm)'	0.814323	1.23658	0.181426	0.518539
'GLYC2Ptex'	'Glycerol-2-phosphate transport via diffusion (extracellular to periplasm)'	0.00261937	0.000291161	-0.954064	-0.888843
'FE2t2pp'	'Iron (II) transport in via proton symport (periplasm)'	0.00261937	0.000291161	-0.954064	-0.888843
'SKMt2pp'	'Shikimate transport in via proton symport (periplasm)'	0.0294679	0.00327556	-0.954064	-0.888843
'CD2t3pp'	'Cadmium (Cd+2) transport out via proton antiport (periplasm)'	0.0294679	0.00764297	-0.586088	-0.740634
'AGt3'	'Silver transport out via proton antiport'	0.011567	0.00283608	-0.610504	-0.754814
'FEOXAMR3'	'Ferroxamine reductase'	0.014734	0.00163778	-0.954064	-0.888843
'FEOXAMR2'	'Ferroxamine reductase'	0.0320845	0.0058919	-0.736041	-0.816363
'FEOXAMexs'	'Ferroxamine Fe3-loading reaction (spontaneous)'	0.0320845	0.00850824	-0.576456	-0.734818
'ARBTNR3'	'Aerobactin reductase'	0.784855	0.632814	-0.093513	-0.193718
'ARBTNR2'	'Aerobactin reductase'	0.000596316	6.62845e-05	-0.954064	-0.888843
'ARBTNR1'	'Aerobactin reductase'	0.000596316	6.62845e-05	-0.954064	-0.888843
'AGMt2pp'	'GlcNAc-anhMurNAc transport in via proton symport (periplasm)'	0.0320845	0.0058919	-0.736041	-0.816363
'AGM3Pt2pp'	'GlcNAc-anhMurNAc tripeptide transport in via proton symport (periplasm)'	0.0260378	0.00327556	-0.90032	-0.8742
'FECRMR1'	'Ferrichrome reductase'	0.00477912	0.000569662	-0.92373	-0.880802
'MSO3tex'	'Methanesulfonate transport via diffusion (extracellular to periplasm)'	0.180641	0.0304749	-0.772873	-0.831296
'UACGAMtex'	'UDP-N-acetyl-D-glucosamine transport via diffusion (extracellular to periplasm)'	0.0294679	0.00327556	-0.954064	-0.888843
'ISETACtex'	'Isethionate transport via diffusion (extracellular to periplasm)'	0.00642937	0.000714667	-0.954064	-0.888843
'GLCUR1Ptex'	'D-glucuronate 1-phosphate transport via diffusion (extracellular to periplasm)'	0.0294679	0.00327556	-0.954064	-0.888843
'ACGALtex'	'N-acetyl-D-galactosamine transport via diffusion (extracellular to periplasm)'	0.0539734	0.0355408	-0.181452	-0.341512
'ACGAL1Ptex'	'N-acetyl-D-galactosamine 1-phosphate transport via diffusion (extracellular to periplasm)'	2000	69.1792	-1.46105	-0.96541
'FECRMR3'	'Ferrichrome reductase'	0.014734	0.00163778	-0.954064	-0.888843
'FE3HOXexs'	'Fe(III) hydroxamate Fe-loading reaction (spontaneaous)'	0.0359619	0.00632289	-0.754927	-0.824178
'FEENTERR2'	'Fe-enterobactin reduction (Fe(III)-unloading)'	0.00802114	0.00109185	-0.866072	-0.863878
'G3PStex'	'Glycerophosphserine transport via diffusion (extracellular to periplasm)'	0.0294679	0.00327556	-0.954064	-0.888843
'ETHAtex'	'Ethanolamine transport via diffusion (extracellular)'	0.0294679	0.00327556	-0.954064	-0.888843
'DOPAtex'	'Dopamine transport via diffusion (extracellular to periplasm)'	0.00491132	0.000545926	-0.954064	-0.888843
'EX_imp_e'	'IMP exchange'	0.00491132	0.000545926	-0.954064	-0.888843
'EX_tym_e'	'Tyramine exchange'	0.000103684	1.15252e-05	-0.954064	-0.888843
'FALDtpp'	'Formaldehyde transport via diffusion (periplasm)'	0.000103684	1.15252e-05	-0.954064	-0.888843
'3UMPtex'	'3UMP transport via diffusion (extracellular to periplasm)'	1.34813e-08	8.51702e-09	-0.199445	-0.368235
'METSOX2tex'	'L-methionine R-oxide diffusion (extracellular)'	1.34813e-08	8.51702e-09	-0.199445	-0.368235
'METSOX1tex'	'L-methionine S-oxide diffusion (extracellular)'	4.46045e-09	2.82047e-09	-0.199057	-0.367671
'METSOX2abcpp'	'L-methionine R-oxide transport via ABC system (periplasm)'	0.000175404	1.94974e-05	-0.954064	-0.888843
'TCYNTtex'	'Thiocyanate transport via diffusion (extracellular to periplasm)'	0.799589	0.631283	-0.102642	-0.21049
'SO3tex'	'Sulfite transport via diffusion (extracellular to periplasm)'	0.814323	0.648403	-0.0989515	-0.203752
'CYANtex'	'Cyanide transport via diffusion (extracellular to periplasm)'	0.802205	0.673723	-0.0758043	-0.160162
'PHEMEtiex'	'Protoheme transport irreversible out via diffusion (periplasm to extracellular)'	0.00420971	0.000467937	-0.954064	-0.888843
'INOSTt4pp'	'Na+/myo-inositol symporter (periplasm)'	0.014734	0.00163778	-0.954064	-0.888843
'CTBTt2rpp'	'Cronobetaine outward transport (H+ antiport)'	0.00639867	0.00335497	-0.280402	-0.475678
'CRNDt2rpp'	'D-carnitine outward transport (H+ antiport)'	9.49303e-05	1.05521e-05	-0.954064	-0.888843
'CRNt2rpp'	'L-carnitine outward transport (H+ antiport)'	9.49303e-05	1.05521e-05	-0.954064	-0.888843
'CRNt8pp'	'L-carnitine/D-carnitine antiporter (periplasm)'	0.0294679	0.00327556	-0.954064	-0.888843
'N2Otex'	'Nitrious oxide transport via diffusion (extracellular to periplasm)'	0.193048	0.029598	-0.814403	-0.846681
'N2Otpp'	'Nitrious oxide transport (diffusion)'	0.0120936	0.00154355	-0.894038	-0.872367
'NOtpp'	'NO transport (diffusion)'	0.0275457	0.00713952	-0.586385	-0.740812
'NOtex'	'Nitric oxide transport via diffusion (extracellular to periplasm)'	0.00261937	0.000291161	-0.954064	-0.888843
'EX_butso3_e'	'Butanesulfonate exchange'	0.0392906	0.00436741	-0.954064	-0.888843
'EX_sulfac_e'	'Sulfoacetate exchange'	2.37326e-05	2.63803e-06	-0.954064	-0.888843
'SULFACtex'	'Sulfoaceate transport via diffusion (extracellular to periplasm)'	2.37326e-05	2.63803e-06	-0.954064	-0.888843
'FEENTERR1'	'Fe-enterobactin reduction (Fe(III)-unloading)'	0.000118663	1.31902e-05	-0.954064	-0.888843
'FE3HOXR3'	'Fe(III)hydroxamate reductase'	0.000118663	1.31902e-05	-0.954064	-0.888843
'ETHSO3tex'	'Ethanesulfonate transport via diffusion (extracellular to periplasm)'	0.0100315	0.00229628	-0.640342	-0.771094
'PTRCt2pp'	'Putrescine transport in via proton symport'	0.0100315	0.00229628	-0.640342	-0.771094
'FECRMUtpp'	'Ferrichrome (minus Fe) secretion (to periplasm)'	0.024844	0.00443809	-0.748025	-0.821362
'FEOXAMUtpp'	'Ferroxamine (minus Fe3) secretion (to periplasm)'	0.0401628	0.00655112	-0.787509	-0.836886
'FEENTERtex'	'Enterochelin transport (secretion periplasm)'	0.00261937	0.000301713	-0.938603	-0.884815
'FEENTERtpp'	'Enterochelin transport (secretion)'	0.014734	0.00163778	-0.954064	-0.888843
'3CMPtex'	'3CMP transport via diffusion (extracellular to periplasm)'	9.49303e-05	1.05521e-05	-0.954064	-0.888843
'23CUMPtex'	'23cUMP transport via diffusion (extracellular to periplasm)'	9.49303e-05	1.05521e-05	-0.954064	-0.888843
'23CCMPtex'	'23cCMP transport via diffusion (extracellular to periplasm)'	9.49303e-05	1.05521e-05	-0.954064	-0.888843
'ARBTNtex'	'Aerobactin secretion (to extracellular)'	0.014734	0.00163778	-0.954064	-0.888843
'ARBTNtpp'	'Aerobactin secretion (to periplasm)'	0.0294679	0.00327556	-0.954064	-0.888843
'O16GLCT1'	'Glucosyltransferase I (LPS O16 antigen biosynthesis)'	9.49303e-05	1.05521e-05	-0.954064	-0.888843
'EX_sel_e'	'Selenate exchange'	0.00736699	0.00081889	-0.954064	-0.888843
'EX_eca4colipa_e'	'(enterobacterial common antigen)x4 core oligosaccharide lipid A exchange'	0.014734	0.00163778	-0.954064	-0.888843
'UREAtex'	'Urea transport via diffusion (extracellular to periplasm)'	0.0297768	0.00491334	-0.782501	-0.834994
'URAtex'	'Uracil transport via diffusion (extracellular to periplasm)'	0.0274968	0.00491334	-0.747905	-0.821312
'TYRtex'	'L-tyrosine transport via diffusion (extracellular to periplasm)'	0.0222554	0.00327556	-0.832149	-0.852819
'GDPtex'	'GDP transport via diffusion (extracellular to periplasm)'	4.46045e-09	2.82047e-09	-0.199057	-0.367671
'CADVtpp'	'Lysine/Cadaverine antiporter (periplasm)'	2000	69.1659	-1.46114	-0.965417
'BUTt2rpp'	'Butyrate transport via proton symport, reversible (periplasm)'	0.0160646	0.00296825	-0.733369	-0.81523
'NO2tex'	'Nitrite transport via diffusion (extracellular to periplasm)'	0.014734	0	-13.1683	-1
'NMNtex'	'NMN transport via diffusion (extracellular to periplasm)'	0.0294679	0.00327556	-0.954064	-0.888843
'EX_mal__D_e'	'D-Malate exchange'	0.00103396	0.000114932	-0.954064	-0.888843
'DURItex'	'Deoxyuridine transport via diffusion (extracellular to periplasm)'	0.0211154	0.00327556	-0.809313	-0.844873
'DMSOtex'	'Dimethyl sulfoxide transport via diffusion (extracellular to periplasm)'	0.0281067	0.00655463	-0.632261	-0.766795
'MELIBtex'	'Melibiose transport via diffusion (extracellular to periplasm)'	0.0115692	0.00331013	-0.543459	-0.713885
'MAN6Ptex'	'Mannose 6-phosphate transport via diffusion (extracellular to periplasm)'	4.55645e-08	2.88118e-08	-0.199057	-0.367671
'LEUtex'	'L-leucine transport via diffusion (extracellular to periplasm)'	5.18422e-05	5.7626e-06	-0.954064	-0.888843
'LCTStex'	'Lactose transport via diffusion (extracellular to periplasm)'	5.18422e-05	5.7626e-06	-0.954064	-0.888843
'DGSNtex'	'Deoxyguanosine transport via diffusion (extracellular to periplasm)'	0.00900655	0.00101398	-0.94853	-0.887418
'CYTDtex'	'Cytidine transport via diffusion (extracellular to periplasm)'	0.0168388	0.00187175	-0.954064	-0.888843
'BUTtex'	'Butyrate transport via diffusion (extracellular to periplasm)'	0.0317792	0.00353247	-0.954064	-0.888843
'NH4tex'	'Ammonia transport via diffusion (extracellular to periplasm)'	0.182469	24.2699	2.12388	132.008
'NACtex'	'Nicotinic acid transport via diffusion (extracellular to periplasm)'	0.0027412	0.000304703	-0.954064	-0.888843
'NAtex'	'Sodium transport via diffusion (extracellular to periplasm)'	0.00256846	0.000308288	-0.920716	-0.879972
'MNLtex'	'Mannitol transport via diffusion (extracellular to periplasm)'	0.00035291	3.92282e-05	-0.954064	-0.888843
'METtex'	'L-methionine transport via diffusion (extracellular to periplasm)'	0.0294679	0.00327556	-0.954064	-0.888843
'SUCRtex'	'Sucrose transport transport via diffusion (extracellular to periplasm)'	0.0294679	0.00327556	-0.954064	-0.888843
'SERtex'	'L-serine transport via diffusion (extracellular to periplasm)'	0.014734	0.00163778	-0.954064	-0.888843
'PPTtex'	'Phosphonate transport via diffusion (extracellular to periplasm)'	0.0106948	0.00163778	-0.814919	-0.846863
'PPPNtex'	'3-phenylpropionate transport via diffusion (extracellular to periplasm)'	0.0186388	0.00873482	-0.329164	-0.531364
'PNTOtex'	'Pantothenate transport via diffusion (extracellular to periplasm)'	0.180641	0.0294174	-0.788211	-0.83715
'EX_pheme_e'	'Protoheme exchange'	0.0294679	0.00327556	-0.954064	-0.888843
'CYSabc2pp'	'L-cysteine export via ABC system (cytoplasm to periplasm)'	0.14734	0.0163778	-0.954064	-0.888843
'PItex'	'Phosphate transport via diffusion (extracellular to periplasm)'	4.77846e-08	3.02157e-08	-0.199056	-0.367669
'PHEtex'	'L-phenylalanine transport via diffusion (extracellular to periplasm)'	4.77846e-08	3.02157e-08	-0.199056	-0.367669
'FE3DCITtonex'	'Ferric-dicitrate transport via ton system (extracellular)'	2.23567e-05	2.23013e-05	-0.00107713	-0.00247712
'MALTtexi'	'MaltoseMaltotriose transport via diffusion (extracellular to periplasm) irreversible'	0.0093176	0.00221692	-0.623554	-0.762072
'MALTPTtexi'	'MaltopentaoseMaltotriose transport via diffusion (extracellular to periplasm) irreversible'	0.0100315	0.00229628	-0.640342	-0.771094
'MALTTTRtexi'	'MaltotetraoseMaltotriose transport via diffusion (extracellular to periplasm) irreversible'	0.0100315	0.00229628	-0.640342	-0.771094
'MALTTRtexi'	'Maltotriose transport via diffusion (extracellular to periplasm) irreversible'	0.0138002	0.00328132	-0.623838	-0.762227
'EX_meoh_e'	'Methanol exchange'	0.0294679	0.00327556	-0.954064	-0.888843
'RMNtex'	'L-rhamnose transport via diffusion (extracellular to periplasm)'	0.0294679	0.00327556	-0.954064	-0.888843
'DCYTt2pp'	'Deoxycytidine transport in via proton symport (periplasm)'	0.0212279	0.00468511	-0.656188	-0.779295
'DADNt2pp'	'Deoxyadenosine transport in via proton symport (periplasm)'	0.0294679	0.00327556	-0.954064	-0.888843
'CYTDt2pp_copy1'	''	0.0294679	0.0018359	-1.2055	-0.937698
'CYNTt2pp'	'Cyanate transport via proton symport (periplasm)'	0.0320845	0.0058919	-0.736041	-0.816363
'FUMt2_3pp'	'Fumarate transport via proton symport (3 H) (periplasm)'	0.000683976	7.60284e-05	-0.954064	-0.888843
'FUMt2_2pp'	'Fumarate transport via proton symport (2 H) (periplasm)'	0.000683976	7.60284e-05	-0.954064	-0.888843
'FE2abcpp'	'Iron (II) transport via ABC system (periplasm)'	1000	0.114129	-3.9426	-0.999886
'DURIt2pp'	'Deoxyuridine transport in via proton symport (periplasm)'	0.0294679	0.00327556	-0.954064	-0.888843
'DINSt2pp'	'Deoxyinosine transport in via proton symport (periplasm)'	0.047481	0.00545587	-0.939657	-0.885094
'DGSNt2pp'	'Deoxyguanosine transport in via proton symport (periplasm)'	0.000974147	0.000108283	-0.954064	-0.888843
'EX_no_e'	'Nitric oxide exchange'	0.00133945	0.000148889	-0.954064	-0.888843
'EX_ni2_e'	'Ni2+ exchange'	0.0294679	0.00327556	-0.954064	-0.888843
'CRNt7pp'	'Carnitine/butyrobetaine antiporter (periplasm)'	0.0124076	0.00217326	-0.756575	-0.824844
'CITt7pp'	'Citrate transport via succinate antiport (periplasm)'	0.0294679	0.00327556	-0.954064	-0.888843
'ORNtex'	'Ornithine transport via diffusion (extracellular to periplasm)'	0.180641	0.0304368	-0.773416	-0.831506
'OCTAtex'	'Octanoate transport via diffusion (extracellular to periplasm)'	0.0294679	0.00327556	-0.954064	-0.888843
'EX_ppa_e'	'Propionate exchange'	0.0294679	0.00327556	-0.954064	-0.888843
'O2tex'	'Oxygen transport via diffusion (extracellular to periplasm)'	0.0294679	0.00327556	-0.954064	-0.888843
'GLNtex'	'L-glutamine transport via diffusion (extracellular to periplasm)'	0.0294679	0.00327556	-0.954064	-0.888843
'GLCURtex'	'D-glucuronat transport via diffusion (extracellular to periplasm)'	0.0351474	0.0333061	-0.0233703	-0.0523899
'GLCNtex'	'D-gluconate transport via diffusion (extracellular to periplasm)'	0.0278986	0.0102798	-0.433598	-0.63153
'CPGNtonex'	'Coprogen transport via ton system (extracellular)'	4.46045e-09	2.82047e-09	-0.199057	-0.367671
'NACtpp'	'Nicotinic acid uptake (periplasm)'	4.77846e-08	3.02157e-08	-0.199056	-0.367669
'HYXNtpp'	'Hypoxanthine transport (periplasm)'	0.117872	0.0131022	-0.954064	-0.888843
'GUAtpp'	'Guanine transport via diffusion (periplasm)'	1.34813e-08	8.51702e-09	-0.199445	-0.368235
'ALLTNt2rpp'	'Allantoin transport in via proton symport (periplasm)'	1.33813e-08	8.43056e-09	-0.200643	-0.369976
'ALAabcpp'	'L-alanine transport via ABC system (periplasm)'	1.33813e-08	8.43056e-09	-0.200643	-0.369976
'ADNt2pp_copy1'	''	0.015322	0.00658569	-0.366713	-0.57018
'ADEt2rpp'	'Adenine transport via proton symport (reversible) (periplasm)'	6.82064e-09	2000	11.4672	2.93227e+11
'INDOLEtex'	'Indole transport via diffusion (extracellular to periplasm)'	1000	0.114053	-3.94289	-0.999886
'EX_cpgn_e'	'Coprogen exchange'	0.0294679	0.00327556	-0.954064	-0.888843
'EX_feoxam_e'	'Ferroxamine exchange'	9.49303e-05	1.05521e-05	-0.954064	-0.888843
'EX_feenter_e'	'Fe-enterobactin exchange'	0.002224	0.000247212	-0.954064	-0.888843
'EX_fecrm_e'	'Ferrichrome exchange'	0.00261937	0.000291161	-0.954064	-0.888843
'EX_fe3hox_e'	'Fe(III)hydroxamate exchange'	0.00523875	0.000582322	-0.954064	-0.888843
'EX_fe3dcit_e'	'Fe(III)dicitrate exchange'	0.00523875	0.000582322	-0.954064	-0.888843
'ASPtex'	'L-aspartate transport via diffusion (extracellular to periplasm)'	0.0294679	0.00327556	-0.954064	-0.888843
'GALt2pp'	'D-galactose transport in via proton symport (periplasm)'	0.000103684	1.15252e-05	-0.954064	-0.888843
'GALCTt2rpp'	'D-galactarte transport via proton symport, reversible (periplasm)'	0.00140324	0.000155979	-0.954064	-0.888843
'EX_fad_e'	'Exchange of Flavin adenine dinucleotide oxidized'	0.000358455	3.98446e-05	-0.954064	-0.888843
'FRULYStex'	'Fructoselysine transporter via diffusion (extracellular)'	0.00982265	0.00109185	-0.954064	-0.888843
'D_LACtex'	'D-lactate transport via diffusion (extracellular to periplasm)'	0.00491132	0.000545926	-0.954064	-0.888843
'INStex'	'Inosine transport via diffusion (extracellular to periplasm)'	0.00453353	0.000503932	-0.954064	-0.888843
'INSTtex'	'Inositol transport via diffusion (extracellular to periplasm)'	0.000358455	3.98446e-05	-0.954064	-0.888843
'HIStex'	'L-histidine transport via diffusion (extracellular to periplasm)'	0.0294679	0.00655112	-0.653034	-0.777687
'ASPt2_3pp'	'L-asparate transport via proton symport (3 H) (periplasm)'	0.0294679	0.00327556	-0.954064	-0.888843
'ASPt2_2pp'	'Aspartate transport via proton symport (2 H) (periplasm)'	0.00140324	0.000155979	-0.954064	-0.888843
'GALTtex'	'Galactitol transport via diffusion (extracellular to periplasm)'	6.69134e-05	0.000111497	0.221751	0.666292
'GALCTNtex'	'D-galactonate transport via diffusion (extracellular to periplasm)'	0.0170619	0.00209481	-0.910883	-0.877223
'GALCTtex'	'D-galactarte transport via diffusion (extracellular to periplasm)'	0.0294679	0.00327556	-0.954064	-0.888843
'GALtex'	'D-galactose transport via diffusion (extracellular to periplasm)'	0.180734	0.0307115	-0.76974	-0.830074
'EX_fruur_e'	'D-Fructuronate exchange'	0.196424	35.0623	2.25165	177.503
'THRt4pp'	'L-threonine via sodium symport (periplasm)'	0.0392906	0.00436741	-0.954064	-0.888843
'XYLUt2pp'	'L-xylulose transport in via proton symport (periplasm)'	0.0392906	0.00436741	-0.954064	-0.888843
'XTSNt2rpp'	'Xanthosine transport via proton symport (periplasm)'	0.0392906	0.00436741	-0.954064	-0.888843
'URIt2pp_copy1'	''	0.00107156	0.000119111	-0.954064	-0.888843
'TYRt2rpp'	'L-tyrosine reversible transport via proton symport (periplasm)'	0.00133945	0.000148889	-0.954064	-0.888843
'THRabcpp'	'L-threonine transport via ABC system (periplasm)'	0.0359619	0.00632289	-0.754927	-0.824178
'EX_gtp_e'	'GTP exchange'	0.0359842	0.00634519	-0.753667	-0.823667
'EX_gdp_e'	'GDP exchange'	0.0468408	0.00759657	-0.790007	-0.837822
'EX_xylu__L_e'	'L-Xylulose exchange'	0.000747601	8.31009e-05	-0.954064	-0.888843
'EX_octa_e'	'Octanoate (n-C8:0) exchange'	0.0294679	0.00327556	-0.954064	-0.888843
'EX_all__D_e'	'D-Allose exchange'	0.00125396	0.000139385	-0.954064	-0.888843
'EX_dca_e'	'Decanoate (n-C10:0) exchange'	0.0294679	0.00327556	-0.954064	-0.888843
'EX_acmum_e'	'N-Acetylmuramate exchange'	1.34813e-08	8.51702e-09	-0.199445	-0.368235
'EX_lyx__L_e'	'L-Lyxose exchange'	0.0294679	0.00327556	-0.954064	-0.888843
'EX_hxa_e'	'Hexanoate (n-C6:0) exchange'	0.00137862	0.000153243	-0.954064	-0.888843
'EX_ppt_e'	'Phosphonate exchange'	0.0108402	0.0070609	-0.186178	-0.348639
'EX_minohp_e'	'Myo-Inositol hexakisphosphate exchange'	0.0128117	0.0110035	-0.0660769	-0.141139
'EX_agm_e'	'Agmatine exchange'	0.0238445	0.0146029	-0.21295	-0.387579
'EX_ala_B_e'	'Beta-Alanine exchange'	0.0442019	0.00491334	-0.954064	-0.888843
'EX_ascb__L_e'	'L-Ascorbate exchange'	0.0160646	0.00296825	-0.733369	-0.81523
'XYLt2pp'	'D-xylose transport in via proton symport (periplasm)'	0.0442019	0.00491334	-0.954064	-0.888843
'AKGt2rpp'	'2-oxoglutarate reversible transport via symport (periplasm)'	1000.01	1.01013	-2.99563	-0.99899
'Kt2pp'	'Potassium transport in via proton symport (periplasm)'	0.00256846	0.000308288	-0.920716	-0.879972
'EX_so3_e'	'Sulfite exchange'	0.00256846	0.000308288	-0.920716	-0.879972
'EX_ca2_e'	'Calcium exchange'	0.00107156	0.000119111	-0.954064	-0.888843
'THMDt2pp_copy1'	''	0.00982265	0.00109185	-0.954064	-0.888843
'TARTRt7pp'	'Tartrate/succinate antiporter (periplasm)'	0.00937979	0.00163778	-0.757938	-0.825393
'SUCFUMtpp'	'Succinate:fumarate antiporter (periplasm)'	0.014734	0.00163778	-0.954064	-0.888843
'SUCCt2_2pp'	'Succinate transport via proton symport (2 H) (periplasm)'	0.014734	0.00163778	-0.954064	-0.888843
'HCINNMtex'	'3-hydroxycinnamic acid transport via diffusion (extracellular to periplasm)'	5.18422e-05	5.7626e-06	-0.954064	-0.888843
'26DAHtex'	'Meso-2,6-Diaminoheptanedioate transport via diffusion (extracellular to periplasm)'	5.18422e-05	5.7626e-06	-0.954064	-0.888843
'DDGLCNtex'	'2-dehydro-3-deoxy-D-gluconate transport via diffusion (extracellular to periplasm)'	5.18422e-05	5.7626e-06	-0.954064	-0.888843
'12PPDStex'	'(S)-Propane-1,2-diol transport via diffusion (extracellular to periplasm)'	1.10011e-09	6.89464e-10	-0.202924	-0.373277
'GLYBtex'	'Glycine betaine transport via diffusion (extracellular to periplasm)'	0.0589359	0.00982668	-0.777973	-0.833265
'GLYALDtex'	'Glyceraldehyde transport via diffusion (extracellular to periplasm)'	0.0589359	0.00982668	-0.777973	-0.833265
'GLUtex'	'L-glutamate transport via diffusion (extracellular to periplasm)'	6.8177	3.98886	-0.232789	-0.414926
'NMNt7pp'	'NMN transport via NMN glycohydrolase (periplasm)'	6.85109	3.98886	-0.234911	-0.417777
'EX_glyb_e'	'Glycine betaine exchange'	0.0616573	0.00873482	-0.848731	-0.858333
'EX_galctn__D_e'	'D-Galactonate exchange'	0.0294679	0.00327556	-0.954064	-0.888843
'EX_cynt_e'	'Cyanate exchange'	0.000974147	0.000108283	-0.954064	-0.888843
'EX_ocdcea_e'	'Octadecenoate (n-C18:1) exchange'	0.000705819	7.84565e-05	-0.954064	-0.888843
'EX_15dap_e'	'1,5-Diaminopentane exchange'	0.00206793	0.000229864	-0.954064	-0.888843
'EX_gam6p_e'	'D-Glucosamine 6-phosphate exchange'	1999.9	0.529643	-3.57702	-0.999735
'EX_ser__D_e'	'D-Serine exchange'	0.000974147	0.000108283	-0.954064	-0.888843
'EX_dad_2_e'	'Deoxyadenosine exchange'	0.00035291	3.92282e-05	-0.954064	-0.888843
'FTHFLi'	'Formate-tetrahydrofolate ligase'	0.0147716	0.00167541	-0.945307	-0.886579
'EX_ocdca_e'	'Octadecanoate (n-C18:0) exchange'	0.0294679	0.00327556	-0.954064	-0.888843
'EX_nac_e'	'Nicotinate exchange'	0.0294679	0.00327556	-0.954064	-0.888843
'EX_lcts_e'	'Lactose exchange'	0.0294679	0.00327556	-0.954064	-0.888843
'EX_glyc3p_e'	'Glycerol 3-phosphate exchange'	0.0300515	0.00661598	-0.657272	-0.779845
'EX_ins_e'	'Inosine exchange'	0.014734	0.00163778	-0.954064	-0.888843
'EX_adn_e'	'Adenosine exchange'	0.00982265	0.00109185	-0.954064	-0.888843
'EX_acac_e'	'Acetoacetate exchange'	0.0122188	0.00368369	-0.520747	-0.698524
'H2SO'	'Hydrogen sulfide oxidation'	0.0468185	0.00752968	-0.793641	-0.839173
'G5SADs'	'L-glutamate 5-semialdehyde dehydratase (spontaneous)'	0.0385785	0.00893923	-0.635045	-0.768285
'EX_mg2_e'	'Mg exchange'	0.0108402	0.00353045	-0.487208	-0.674319
'EX_mmet_e'	'S-Methyl-L-methionine exchange'	0.014734	0.00163778	-0.954064	-0.888843
'EX_glcur_e'	'D-Glucuronate exchange'	0.014734	0.00163778	-0.954064	-0.888843
'EX_maltpt_e'	'Maltopentaose exchange'	0.000230744	2.56487e-05	-0.954064	-0.888843
'EX_h2s_e'	'Hydrogen sulfide exchange'	0.0294679	0.00327556	-0.954064	-0.888843
'EX_ttdcea_e'	'Tetradecenoate (n-C14:1) exchange'	0.0027412	0.000304703	-0.954064	-0.888843
'EX_lac__D_e'	'D-lactate exchange'	0.0294679	0.00327556	-0.954064	-0.888843
'EX_f6p_e'	'D-fructose 6-phosphate exchange'	0.0297781	0.00335371	-0.948371	-0.887377
'EX_urea_e'	'Urea exchange'	1.36131	0.00355392	-2.58325	-0.997389
'EX_nmn_e'	'NMN exchange'	0.0595563	0.00670743	-0.948371	-0.887377
'AOBUTDs'	'L-2-amino-3-oxobutanoate decarboxylation (spontaneous)'	0.0294679	0.00327556	-0.954064	-0.888843
'EX_hdcea_e'	'Hexadecenoate (n-C16:1) exchange'	0.0295042	0.00404681	-0.86277	-0.862839
'EX_malttr_e'	'Maltotriose exchange'	0.14734	0.0217497	-0.830866	-0.852384
'EX_gbbtn_e'	'Gamma-butyrobetaine exchange'	0.014734	0.00163778	-0.954064	-0.888843
'EX_cbl1_e'	'Cob(I)alamin exchange'	1.36721	0.636338	-0.332147	-0.534571
'EX_but_e'	'Butyrate (n-C4:0) exchange'	0.049495	0.00849784	-0.765253	-0.828309
'EX_galur_e'	'D-Galacturonate exchange'	0.0138002	0.00328132	-0.623838	-0.762227
'EX_indole_e'	'Indole exchange'	1.38214e-08	2000	11.1605	1.44704e+11
'EX_glyclt_e'	'Glycolate exchange'	1000.01	1.00853	-2.99632	-0.998991
'EX_rmn_e'	'L-Rhamnose exchange'	0.000714374	7.94075e-05	-0.954064	-0.888843
'EX_fuc__L_e'	'L-Fucose exchange'	0.000747601	8.31009e-05	-0.954064	-0.888843
'EX_dha_e'	'Dihydroxyacetone exchange'	0.000714374	7.94075e-05	-0.954064	-0.888843
'EX_amp_e'	'AMP exchange'	0.000714374	0	-11.8539	-1
'EX_acnam_e'	'N-Acetylneuraminate exchange'	0.000747601	8.31009e-05	-0.954064	-0.888843
'EX_26dap__M_e'	'Meso-2,6-Diaminoheptanedioate exchange'	0.00133945	0.000148889	-0.954064	-0.888843
'EX_tmao_e'	'Trimethylamine N-oxide exchange'	0.000974147	0.000108283	-0.954064	-0.888843
'URIC'	'Uricase'	0.00107156	0.000119111	-0.954064	-0.888843
'HEX4'	'Hexokinase (D-mannose:ATP)'	0.000103684	1.15252e-05	-0.954064	-0.888843
'DNMPPA'	'Dihydroneopterin monophosphate dephosphorylase'	0.784855	0.627145	-0.097421	-0.200941
'EX_zn2_e'	'Zinc exchange'	0.0294679	0.00327556	-0.954064	-0.888843
'EX_tre_e'	'Trehalose exchange'	0.0294679	0.00327556	-0.954064	-0.888843
'EX_sucr_e'	'Sucrose exchange'	0.180641	0.0304368	-0.773416	-0.831506
'EX_acald_e'	'Acetaldehyde exchange'	0.0294679	0.00327556	-0.954064	-0.888843
'EX_din_e'	'Deoxyinosine exchange'	1999.9	0.394681	-3.70476	-0.999803
'EX_trp__L_e'	'L-Tryptophan exchange'	0.180641	0.0737596	-0.388997	-0.591678
'EX_thm_e'	'Thiamin exchange'	0.0294679	0.00327556	-0.954064	-0.888843
'EX_ser__L_e'	'L-Serine exchange'	0.0294679	0.00327556	-0.954064	-0.888843
'EX_lys__L_e'	'L-Lysine exchange'	0.0410911	0.0102578	-0.602692	-0.750364
'EX_gly_e'	'Glycine exchange'	0.210109	0.0314944	-0.824211	-0.850104
'EX_for_e'	'Formate exchange'	0.218889	0.0656235	-0.523165	-0.700198
'EX_xyl__D_e'	'D-Xylose exchange'	0.00206793	0.000229864	-0.954064	-0.888843
'EX_gal_e'	'D-Galactose exchange'	0.00206793	0.000229864	-0.954064	-0.888843
'EX_fru_e'	'D-Fructose exchange'	0.0386636	0.00902432	-0.631888	-0.766594
'EX_arab__L_e'	'L-Arabinose exchange'	0.014734	0.00163778	-0.954064	-0.888843
'EX_dgsn_e'	'Deoxyguanosine exchange'	0.014734	0.00163778	-0.954064	-0.888843
'EX_alltn_e'	'Allantoin exchange'	0.0294679	0.000722436	-1.61055	-0.975484
'EX_glc__D_e'	'D-Glucose exchange'	0.0294679	0.000722442	-1.61055	-0.975484
'EX_fe2_e'	'Fe2+ exchange'	0.0294679	0.00327556	-0.954064	-0.888843
'EX_thym_e'	'Thymine exchange'	2.23045e-05	2.2298e-05	-0.000124839	-0.000287412
'EX_spmd_e'	'Spermidine exchange'	0.00140324	0.000155979	-0.954064	-0.888843
'EX_ptrc_e'	'Putrescine exchange'	0.0115692	0.00331013	-0.543459	-0.713885
'EX_btn_e'	'Biotin exchange'	0.0294679	0.00327556	-0.954064	-0.888843
'EX_tyr__L_e'	'L-Tyrosine exchange'	0.00256846	0.000308288	-0.920716	-0.879972
'EX_thymd_e'	'Thymidine exchange'	0.047481	0.00545587	-0.939657	-0.885094
'EX_xan_e'	'Xanthine exchange'	0.00137862	0.000153243	-0.954064	-0.888843
'EX_val__L_e'	'L-Valine exchange'	0.000175404	1.94974e-05	-0.954064	-0.888843
'EX_ura_e'	'Uracil exchange'	0.000175404	1.94974e-05	-0.954064	-0.888843
'EX_sbt__D_e'	'D-Sorbitol exchange'	5.56056e-09	3.479e-09	-0.203663	-0.374342
'EX_rib__D_e'	'D-Ribose exchange'	5.56056e-09	3.479e-09	-0.203663	-0.374342
'EX_mn2_e'	'Mn2+ exchange'	1000.93	2000	0.300625	0.998134
'EX_man_e'	'D-Mannose exchange'	0.00124076	1999.81	6.2073	1.61176e+06
'EX_glyc_e'	'Glycerol exchange'	0.00035291	3.92282e-05	-0.954064	-0.888843
'EX_gln__L_e'	'L-Glutamine exchange'	0.0294679	0.00327556	-0.954064	-0.888843
'EX_glcn_e'	'D-Gluconate exchange'	0.0294679	0.00327556	-0.954064	-0.888843
'EX_fe3_e'	'Fe3+ exchange'	0.000705819	7.84565e-05	-0.954064	-0.888843
'EX_crn_e'	'L-Carnitine exchange'	0.00035291	3.92282e-05	-0.954064	-0.888843
'EX_met__L_e'	'L-Methionine exchange'	0.0170619	0.00209481	-0.910883	-0.877223
'EX_gua_e'	'Guanine exchange'	0.0294679	0.00327556	-0.954064	-0.888843
'EX_glu__L_e'	'L-Glutamate exchange'	0.000747601	8.31009e-05	-0.954064	-0.888843
'EX_fum_e'	'Fumarate exchange'	0.00107156	0.000119111	-0.954064	-0.888843
'EX_arg__L_e'	'L-Arginine exchange'	0.0392906	0.00436741	-0.954064	-0.888843
'EX_ala__L_e'	'L-Alanine exchange'	0.0294679	0.00327556	-0.954064	-0.888843
'EX_akg_e'	'2-Oxoglutarate exchange'	1.33774	0.000364885	-3.56422	-0.999727
'EX_ac_e'	'Acetate exchange'	0.0392906	0.00436741	-0.954064	-0.888843
'EX_4abut_e'	'4-Aminobutanoate exchange'	0.0392906	0.00436741	-0.954064	-0.888843
'EX_ade_e'	'Adenine exchange'	0.0392906	0.00436741	-0.954064	-0.888843
'EX_h_e'	'H+ exchange'	0.0351474	0.0333061	-0.0233703	-0.0523899
'EX_pi_e'	'Phosphate exchange'	0.0539734	0.0621479	0.0612467	0.151454
'EX_cellb_e'	'Cellobiose exchange'	4.46045e-09	2.82047e-09	-0.199057	-0.367671
'EX_acgam_e'	'N-Acetyl-D-glucosamine exchange'	0.0170619	0.00209481	-0.910883	-0.877223

## Sheet: Yli_batch
rxns	rxnNames	GEM flux variability ranges [mmol/gDw h]	ecModel flux variability ranges [mmol/gDw h]	log10FC	rel_diff
'xAMINOACID'	'protein pseudoreaction'	5.60393e-05	2.80197e-05	-0.30103	-0.5
'xLIPID'	'lipid pseudoreaction'	5.60393e-08	2.77722e-08	-0.304882	-0.504415
'xMAINTENANCE'	'Non-growth associated maintenance (NGAM)'	1000	0.022758	-4.64287	-0.999977
'xPOOL_AC_EM'	'Acyl-CoAs pool'	1000	0	-18	-1
'xPOOL_AC_LP'	'Acyl-CoAs pool'	1999.97	0.0326506	-4.78713	-0.999984
'xPOOL_FA_EM'	'Fatty acids pool'	1000	4.60032e-05	-7.33721	-1
'xPOOL_FA_LP'	'Fatty acids pool'	1000	0.00190583	-5.71992	-0.999998
'y000089'	'5PP-IP5 pyrophosphorylation to 5,6-PP2-IP4'	2.47414e-05	1.23707e-05	-0.30103	-0.5
'y000146'	'adenosylmethionine-8-amino-7-oxononanoate transaminase'	169.124	0.000211638	-5.90261	-0.999999
'y000193'	'alpha,alpha-trehalase'	452.686	0.0133318	-4.53091	-0.999971
'y000208'	'argininosuccinate synthase'	452.686	0.0133567	-4.5301	-0.99997
'y000275'	'choline/ethanolaminephosphotransferase'	1000	0.00744705	-5.12802	-0.999993
'y000369'	'ethyl acetate-hydrolyzing esterase'	446.363	0.000650077	-5.83672	-0.999999
'y000400'	'fatty-acid--CoA ligase (dodecanoate)'	246.639	0.000205501	-6.07925	-0.999999
'y000402'	'fatty-acid--CoA ligase (hexadecanoate)'	285.927	0.000120753	-6.37436	-1
'y000410'	'fatty-acid--CoA ligase (octanoate)'	296.086	0.119402	-3.39441	-0.999597
'y000484'	'glutathione peroxidase, mitochondria'	375.227	0.00048782	-5.88603	-0.999999
'y000527'	'guanine phosphoribosyltransferase'	374.93	0.0277181	-4.13119	-0.999926
'y000562'	'hypoxanthine phosphoribosyltransferase (Hypoxanthine)'	382.418	0.0283774	-4.12957	-0.999926
'y000576'	'inositolphosphotransferase'	246.639	0.000205501	-6.07925	-0.999999
'y000578'	'inositolphosphotransferase'	375.345	0.025718	-4.16419	-0.999931
'y000579'	'inositolphosphotransferase'	340.708	0.0252302	-4.13046	-0.999926
'y000580'	'inositolphosphotransferase'	683.926	0.00115064	-5.77407	-0.999998
'y000581'	'inositolphosphotransferase'	1000	0.00320197	-5.49458	-0.999997
'y000584'	'inositolphosphotransferase'	774.845	0.00317693	-5.38721	-0.999996
'y000587'	'IPC synthase'	295.967	0.00061052	-5.68554	-0.999998
'y000588'	'IPC synthase'	295.967	0.00061052	-5.68554	-0.999998
'y000590'	'IPC synthase'	296.086	0.119402	-3.39441	-0.999597
'y000592'	'IPC synthase'	515.85	0.000383011	-6.12931	-0.999999
'y000594'	'IPC synthase'	375.227	0.00048782	-5.88603	-0.999999
'y000595'	'IPC synthase'	375.227	0.00048782	-5.88603	-0.999999
'y000656'	'isoamyl acetate-hydrolyzing esterase'	507.877	0.000738378	-5.83748	-0.999999
'y000657'	'isobutyl acetate-hydrolyzing esterase'	285.927	0.000120753	-6.37436	-1
'y000679'	'L-asparaginase'	434.941	0.000650077	-5.82547	-0.999999
'y000762'	'N-formyl-L-kynurenine amidohydrolase'	295.967	0.00061052	-5.68554	-0.999998
'y000844'	'peroxisomal acyl-CoA thioesterase'	235.165	8.63033e-06	-7.43534	-1
'y000845'	'peroxisomal acyl-CoA thioesterase'	235.165	8.63033e-06	-7.43534	-1
'y000847'	'peroxisomal acyl-CoA thioesterase'	527.272	0.000798224	-5.81991	-0.999998
'y000849'	'peroxisomal acyl-CoA thioesterase'	362.556	0.00048782	-5.87112	-0.999999
'y000850'	'peroxisomal acyl-CoA thioesterase'	1000	1.16622e-05	-7.93322	-1
'y000854'	'phenylpyruvate decarboxylase'	1000	1.16622e-05	-7.93322	-1
'y000929'	'polyamine oxidase'	1000	0.00254487	-5.59433	-0.999997
'y000936'	'poylamine oxidase'	999.822	0.000228802	-6.64046	-1
'y000937'	'poylamine oxidase'	1000	0.00254487	-5.59433	-0.999997
'y000964'	'reduced glutathione via ABC system'	164.317	0.000127075	-6.11162	-0.999999
'y001004'	'sphingoid base-phosphate phosphatase (phytosphingosine 1-phosphate)'	348.197	0.00016051	-6.33632	-1
'y001028'	'taurcholate via ABC system'	1000	1.17388e-05	-7.93038	-1
'y001032'	'thiamin diphosphatase'	1000	1.17388e-05	-7.93038	-1
'y001100'	'3-hexaprenyl-4,5-dihydroxybenzoate transport'	1000	1.16622e-05	-7.93322	-1
'y001101'	'4-aminobutyrate transport'	2000	2.32603e-05	-7.93442	-1
'y001102'	'5-aminolevulinate transport'	1000	5.92928e-05	-7.227	-1
'y001103'	'5-formyltetrahydrofolic acid transport'	1000	0.0926647	-4.03309	-0.999907
'y001104'	'8-Amino-7-oxononanoate transport'	1000	1.16622e-05	-7.93322	-1
'y001106'	'acetate transport'	1000	1.16622e-05	-7.93322	-1
'y001108'	'adenine transport'	525.664	0.000738378	-5.85243	-0.999999
'y001109'	'adenosine transport'	525.664	0.000738378	-5.85243	-0.999999
'y001111'	'ADP/ATP transporter'	379.148	0.000616736	-5.78871	-0.999998
'y001112'	'AKG transporter, mitochonrial'	125	1.2404e-05	-7.00335	-1
'y001113'	'allantoate uniport'	515.85	0.000427299	-6.08179	-0.999999
'y001114'	'allantoin uniport'	328.876	0.0365336	-3.95434	-0.999889
'y001115'	'ammonia transport'	356.478	0.0363752	-3.99123	-0.999898
'y001116'	'AMP/ATP transporter'	515.85	0.000383011	-6.12931	-0.999999
'y001118'	'aspartate-glutamate transporter'	102.057	0.000245326	-5.6191	-0.999998
'y001119'	'biotin uptake'	102.057	0.000347041	-5.46846	-0.999997
'y001121'	'ceramide-2'' (sphinganine:n-C24:0OH) transport'	725.896	0.00313353	-5.36484	-0.999996
'y001122'	'ceramide-2'' (sphinganine:n-C26:0OH) transport'	1000	0.00357391	-5.44686	-0.999996
'y001123'	'ceramide-3 (Phytosphingosine:n-C24:0OH) transport'	1000	0.145627	-3.83676	-0.999854
'y001124'	'ceramide-3 (Phytosphingosine:n-C26:0OH) transport'	1000	0.0415702	-4.38122	-0.999958
'y001126'	'citrate transport'	499.895	0.000174468	-6.45716	-1
'y001129'	'coenzyme A transport'	499.895	0.000174468	-6.45716	-1
'y001130'	'CTP transport'	102.057	0.000245326	-5.6191	-0.999998
'y001131'	'CTP/CMP antiport'	102.057	0.000347041	-5.46846	-0.999997
'y001132'	'cytidine transport'	125	1.2404e-05	-7.00335	-1
'y001133'	'cytosine transport'	515.85	0.000427299	-6.08179	-0.999999
'y001134'	'D-fructose transport'	379.148	0.000616736	-5.78871	-0.999998
'y001135'	'D-galactose transport'	515.85	0.000383011	-6.12931	-0.999999
'y001136'	'D-lactate transport'	1000	0.00112371	-5.94935	-0.999999
'y001137'	'D-lactate transport'	1000	0.000215699	-6.66615	-1
'y001147'	'ergosterol transport'	724.274	0.000186858	-6.58839	-1
'y001149'	'ethanolamine transport'	999.896	0.00197568	-5.70424	-0.999998
'y001151'	'fadH2 transport'	724.274	0.000186858	-6.58839	-1
'y001165'	'GDP-mannose antiport'	1000	0.00320197	-5.49458	-0.999997
'y001166'	'glucose transport'	1000	0.146077	-3.83542	-0.999854
'y001167'	'glutathione transport'	1000	0.0415702	-4.38122	-0.999958
'y001168'	'glutathione transport'	999.896	0.0371151	-4.4304	-0.999963
'y001169'	'glycero-3-phospho-1-inositol transport'	164.317	0.000127075	-6.11162	-0.999999
'y001170'	'glycero-3-phosphocholine transport'	999.896	0.00197568	-5.70424	-0.999998
'y001171'	'glycerol transport'	999.896	0.00197568	-5.70424	-0.999998
'y001172'	'glycerol transport via channel'	999.945	0.00438307	-5.3582	-0.999996
'y001174'	'glycogen vacuolar ''transport'' via autophagy'	1000	0.0168759	-4.77273	-0.999983
'y001176'	'guanine transport'	1000	0.261315	-3.58284	-0.999739
'y001179'	'iron (II) transport'	1000	0.189156	-3.72318	-0.999811
'y001180'	'isoamyl acetate transport'	430.349	0.000622231	-5.83987	-0.999999
'y001181'	'isobutyl acetate transport'	430.349	0.000622231	-5.83987	-0.999999
'y001182'	'isopentenyl diphosphate transport'	396.162	0.000608822	-5.81338	-0.999998
'y001183'	'L-alanine transport'	295.967	0.000585896	-5.70342	-0.999998
'y001184'	'L-arganine transport'	295.967	0.000585896	-5.70342	-0.999998
'y001187'	'L-asparagine transport'	1000	0.185329	-3.73206	-0.999815
'y001188'	'L-aspartate transport'	740.483	0.0137446	-4.73138	-0.999981
'y001189'	'L-aspartate transport'	555.526	0.0415702	-4.12592	-0.999925
'y001194'	'L-glutamate transport'	362.556	0.00047197	-5.88546	-0.999999
'y001195'	'L-glutamate transport'	362.556	0.00047197	-5.88546	-0.999999
'y001196'	'L-glutamate transport'	505.835	0.000702662	-5.85726	-0.999999
'y001197'	'L-glutamine transport'	505.835	0.000702662	-5.85726	-0.999999
'y001199'	'L-glutamine transport'	164.426	1.20784e-05	-7.13396	-1
'y001201'	'L-histidine transport'	164.426	1.20784e-05	-7.13396	-1
'y001204'	'L-isoleucine transport'	164.317	2.54516e-05	-6.80997	-1
'y001205'	'L-isoleucine transport'	164.317	2.54516e-05	-6.80997	-1
'y001206'	'L-lactate transport'	355.641	0.000312089	-6.05673	-0.999999
'y001209'	'L-leucine transport, vacuoluar'	451.351	0.000446106	-6.00508	-0.999999
'y001210'	'L-leucine transport, vacuoluar'	451.351	0.000444187	-6.00695	-0.999999
'y001211'	'L-leucine transport'	451.351	0.000446106	-6.00508	-0.999999
'y001215'	'L-phenylalanine transport'	493.286	1.2299e-05	-7.60323	-1
'y001216'	'L-proline transport'	164.426	1.20885e-05	-7.1336	-1
'y001217'	'L-serine transport'	1000	0.00684546	-5.1646	-0.999993
'y001219'	'L-tryptophan transport'	422.453	0.000320669	-6.11972	-0.999999
'y001221'	'L-tyrosine transport'	422.453	0.000320669	-6.11972	-0.999999
'y001222'	'L-tyrosine transport'	422.453	0.000320669	-6.11972	-0.999999
'y001225'	'lanosterol transport'	724.274	0.00101269	-5.85443	-0.999999
'y001229'	'NAD transport'	1.09893e-05	5.49371e-06	-0.301104	-0.500086
'y001230'	'NAD transport'	830.549	0.0183957	-4.65465	-0.999978
'y001231'	'NAD transport'	2000	0.0629139	-4.50228	-0.999969
'y001232'	'NAD transport'	1000	0.0235057	-4.62883	-0.999976
'y001235'	'nicotinate transport'	446.916	0.00137517	-5.51187	-0.999997
'y001236'	'octadecanoate (n-C18:0) transport'	830.549	0.0183957	-4.65465	-0.999978
'y001239'	'oxaloacetate transport'	1000	0.00684546	-5.1646	-0.999993
'y001241'	'pantothenate transport'	169.124	0.000211638	-5.90261	-0.999999
'y001242'	'pentaprenyl diphosphate transport'	1000	0.00472605	-5.3255	-0.999995
'y001244'	'phosphate transport'	1000	0.00129547	-5.88757	-0.999999
'y001252'	'putrescine transport'	37.6969	1.53528e-05	-6.39012	-1
'y001253'	'pyridoxine symport'	29.8727	3.17866e-06	-6.97303	-1
'y001254'	'pyruvate transport'	31.0441	6.06008e-06	-6.7095	-1
'y001255'	'S-adenosyl-L-methionine transport'	31.0441	6.06008e-06	-6.7095	-1
'y001256'	'S-adenosyl-L-methionine transport'	31.0441	6.06008e-06	-6.7095	-1
'y001257'	'S-methylmethionine permease'	31.0441	6.06008e-06	-6.7095	-1
'y001258'	'sodium proton antiporter'	31.0441	6.06008e-06	-6.7095	-1
'y001260'	'spermidine transport'	31.0441	6.06008e-06	-6.7095	-1
'y001261'	'spermidine transport'	31.0441	6.06008e-06	-6.7095	-1
'y001262'	'spermine transport'	31.0441	6.06008e-06	-6.7095	-1
'y001263'	'spermine transport'	29.8727	3.17866e-06	-6.97303	-1
'y001264'	'succinate transport'	31.0441	6.06008e-06	-6.7095	-1
'y001265'	'succinate-fumarate transport'	29.7604	3.16048e-06	-6.97389	-1
'y001267'	'sulfite transport'	422.453	0.000320669	-6.11972	-0.999999
'y001268'	'taurine transport'	4.71851e-08	2.33842e-08	-0.304882	-0.504415
'y001269'	'thiamine diphosphate transport'	1000	0.034187	-4.46614	-0.999966
'y001270'	'thiamine transport'	816.46	0.00184813	-5.6452	-0.999998
'y001271'	'UDPgalactose transport'	1000	0.0344478	-4.46284	-0.999966
'y001272'	'uracil transport'	937.394	0.0918082	-4.00904	-0.999902
'y001273'	'urea transport'	362.948	0.00085474	-5.62801	-0.999998
'y001274'	'uridine transport'	116.066	1.21615e-05	-6.97972	-1
'y001275'	'UTP transport'	500	0.00119197	-5.6227	-0.999998
'y001545'	'(R)-carnitine exchange'	935.805	5.34416e-05	-7.24331	-1
'y001546'	'(R)-lactate exchange'	935.805	5.34416e-05	-7.24331	-1
'y001547'	'(R)-mevalonate exchange'	935.805	5.34416e-05	-7.24331	-1
'y001548'	'(R)-pantothenate exchange'	935.805	5.34416e-05	-7.24331	-1
'y001560'	'1D-myo-inositol 1,3,4,5,6-pentakisphosphate diffusion'	2.27968e-05	1.13984e-05	-0.30103	-0.5
'y001562'	'1D-myo-inositol 1-phosphate transport'	724.277	0.000177427	-6.61088	-1
'y001566'	'2''-deoxyuridine exchange'	724.277	0.000177427	-6.61088	-1
'y001568'	'2-dehydropantoate transport'	724.277	0.000177427	-6.61088	-1
'y001572'	'2-isopropylmalate exchange'	295.967	0.00061052	-5.68554	-0.999998
'y001573'	'2-isopropylmalate transport'	295.967	0.00061052	-5.68554	-0.999998
'y001574'	'2-isopropylmalate transport'	1999.6	0.399176	-3.69978	-0.9998
'y001600'	'3-methylbutanal transport'	999.602	0.00681771	-5.16619	-0.999993
'y001604'	'4-aminobenzoate exchange'	1999.6	0.399822	-3.69908	-0.9998
'y001605'	'4-aminobenzoate transport'	1999.6	0.399049	-3.69992	-0.9998
'y001607'	'4-aminobutanal transport'	543.236	0.0163994	-4.52016	-0.99997
'y001608'	'4-aminobutyrate transport'	724.314	0.0179114	-4.6068	-0.999975
'y001609'	'4-hydroxy-2-oxoglutarate transport'	999.987	0.000585394	-6.23255	-0.999999
'y001610'	'4-hydroxy-2-oxoglutarate transport'	999.987	0.000585394	-6.23255	-0.999999
'y001611'	'4-hydroxybenzoate transport'	421.063	0.0146491	-4.45854	-0.999965
'y001621'	'5-aminolevulinate exchange'	431.123	0.00148115	-5.464	-0.999997
'y001627'	'7,8-diaminononanoate exchange'	724.277	0.00151205	-5.68034	-0.999998
'y001628'	'7,8-diaminononanoate transport'	999.896	0.00253562	-5.59587	-0.999997
'y001629'	'8-amino-7-oxononanoate exchange'	37.6969	1.53528e-05	-6.39012	-1
'y001637'	'acetyl-CoA transport'	1000	0.00759179	-5.11966	-0.999992
'y001638'	'acetylcarnitine transport'	1000	0.00380322	-5.41985	-0.999996
'y001640'	'adenine transport'	1000	0.0207527	-4.68292	-0.999979
'y001648'	'allantoate exchange'	951	0	-17.9782	-1
'y001652'	'alpha-ketoglutarate/malate transporter'	935.805	5.34416e-05	-7.24331	-1
'y001654'	'ammonium exchange'	935.805	5.34416e-05	-7.24331	-1
'y001656'	'AMP transport'	1000	0.0992255	-4.00338	-0.999901
'y001657'	'arginine transport'	935.805	5.34416e-05	-7.24331	-1
'y001658'	'asparagine transport'	0.0107326	0.0107307	-7.79731e-05	-0.000179524
'y001664'	'bicarbonate formation'	1.09893e-05	5.49465e-06	-0.30103	-0.5
'y001668'	'bicarbonate formation'	525.664	0.000738378	-5.85243	-0.999999
'y001669'	'bicarbonate transport'	446.363	0.000650077	-5.83672	-0.999999
'y001671'	'biotin exchange'	434.564	4.83514e-05	-6.95364	-1
'y001672'	'carbon dioxide exchange'	80.7781	4.22074e-05	-6.28191	-0.999999
'y001674'	'carnitine-acetylcarnitine carrier'	1000	1.17388e-05	-7.93038	-1
'y001675'	'CDP transport'	1000	1.17388e-05	-7.93038	-1
'y001678'	'ceramide transport'	6.18674e-06	3.09284e-06	-0.301104	-0.500085
'y001679'	'ceramide transport'	6.18674e-06	3.09284e-06	-0.301104	-0.500085
'y001680'	'ceramide transport'	1000	0.00520546	-5.28354	-0.999995
'y001681'	'ceramide transport'	1000	0.00732095	-5.13543	-0.999993
'y001683'	'choline exchange'	1717.28	0.377663	-3.65774	-0.99978
'y001695'	'CO2 transport'	1089.69	0.0104214	-5.01937	-0.99999
'y001696'	'CO2 transport'	1796.47	0.0105552	-5.23095	-0.999994
'y001697'	'CO2 transport'	1724.27	0.0107858	-5.20375	-0.999994
'y001698'	'coenzyme A transport'	1092.49	0.0103197	-5.02475	-0.999991
'y001699'	'coenzyme A transport'	1796.47	0.0105669	-5.23047	-0.999994
'y001705'	'cytosine exchange'	1000	0.102837	-3.98785	-0.999897
'y001706'	'D-arabinose exchange'	500	0.0514185	-3.98785	-0.999897
'y001709'	'D-fructose exchange'	1000	0.0023139	-5.63566	-0.999998
'y001710'	'D-galactose exchange'	1826.64	0.0228526	-4.90272	-0.999987
'y001712'	'D-glucitol exchange'	826.816	0.0266621	-4.49152	-0.999968
'y001714'	'D-glucose exchange'	1000	5.92928e-05	-7.227	-1
'y001715'	'D-mannose exchange'	1000	0.00464018	-5.33347	-0.999995
'y001716'	'D-ribose exchange'	2000	0.175674	-4.05632	-0.999912
'y001717'	'D-sorbitol transport'	500	0.0558371	-3.95205	-0.999888
'y001718'	'D-xylose exchange'	1649.49	0.141455	-4.06673	-0.999914
'y001719'	'D-xylose transport'	1.09893e-05	5.49371e-06	-0.301104	-0.500086
'y001726'	'deamino-NAD+ diffusion'	1000	0.0984484	-4.00679	-0.999902
'y001730'	'deoxycytidine exchange'	80.7781	4.22074e-05	-6.28191	-0.999999
'y001731'	'deoxycytidine transport'	827.258	0.000533765	-6.19029	-0.999999
'y001735'	'deoxyuridine transport'	827.258	0.000532867	-6.19102	-0.999999
'y001737'	'dGDP transport'	1000	0.0926647	-4.03309	-0.999907
'y001738'	'dhnpt transport'	1831.62	0.295617	-3.79211	-0.999839
'y001743'	'dihydrofolate transport'	1000	0.00229108	-5.63996	-0.999998
'y001745'	'dihydropteroate transport'	527.272	0.000798224	-5.81991	-0.999998
'y001746'	'dihydroxyacetone phosphate transport'	1000	0.00497086	-5.30357	-0.999995
'y001747'	'diphosphate transport'	1000	0.0364214	-4.43864	-0.999964
'y001748'	'dolichol phosphate transport'	999.45	0.0272236	-4.56482	-0.999973
'y001749'	'dTTP exchange'	1000	0.00229108	-5.63996	-0.999998
'y001751'	'dUDP diffusion'	999.45	0.0272236	-4.56482	-0.999973
'y001752'	'dUMP transport'	2.27968e-05	1.13984e-05	-0.30103	-0.5
'y001758'	'ergosterol transport'	999.897	0.0181043	-4.74217	-0.999982
'y001760'	'ergosterol transport'	999.897	0.0181043	-4.74217	-0.999982
'y001763'	'ethanol transport, mitochondrial'	1058.52	0.455628	-3.36609	-0.99957
'y001764'	'ethanolamine exchange'	434.564	4.83514e-05	-6.95364	-1
'y001765'	'ethyl acetate exchange'	434.564	4.84222e-05	-6.95301	-1
'y001770'	'fatty acid transport'	452.685	0.0135926	-4.52249	-0.99997
'y001771'	'fatty acid transport'	452.685	0.0135926	-4.52249	-0.99997
'y001774'	'fatty acid transport'	444.564	0.0133084	-4.52381	-0.99997
'y001775'	'fatty acid transport'	452.686	0.0133318	-4.53091	-0.999971
'y001776'	'fatty acid transport'	452.686	0.0133567	-4.5301	-0.99997
'y001777'	'myristate (n-C14:0) transport'	434.566	2.985e-05	-7.16311	-1
'y001788'	'fecosterol exchange'	159.083	0.018226	-3.94093	-0.999885
'y001791'	'FMN exchange'	713.553	0.0566472	-4.10025	-0.999921
'y001792'	'folic acid exchange'	1826.58	0.0247917	-4.86733	-0.999986
'y001793'	'formate exchange'	1349.73	0.0240121	-4.74982	-0.999982
'y001794'	'formate transport'	713.553	0.0505356	-4.14983	-0.999929
'y001795'	'formate transport'	877.187	0.0505356	-4.23949	-0.999942
'y001796'	'formate transport'	713.553	0.0514317	-4.1422	-0.999928
'y001798'	'fumarate(2-) exchange'	713.553	0.0514317	-4.1422	-0.999928
'y001800'	'gamma-aminobutyrate exchange'	713.553	0.0514317	-4.1422	-0.999928
'y001801'	'GDP transport'	713.553	0.0505356	-4.14983	-0.999929
'y001802'	'GDP transport'	1000	0.0099767	-5.00101	-0.99999
'y001803'	'GDP-alpha-D-mannose transport'	1000	0.0099767	-5.00101	-0.99999
'y001806'	'glutathione disulfide exchange'	434.564	0.000132756	-6.515	-1
'y001815'	'glyoxylate exchange'	434.564	0.000132756	-6.515	-1
'y001816'	'glyoxylate transport'	999.822	0.000228589	-6.64087	-1
'y001817'	'glyoxylate transport'	1000	0.0272274	-4.56499	-0.999973
'y001818'	'guanine exchange'	1999.99	0.029122	-4.83681	-0.999985
'y001824'	'H+ diffusion'	997.35	0.175671	-3.75415	-0.999824
'y001826'	'H+ diffusion'	169.124	0.000211638	-5.90261	-0.999999
'y001827'	'H+ diffusion'	169.124	0.000211638	-5.90261	-0.999999
'y001829'	'H+ diffusion'	169.124	0.000211638	-5.90261	-0.999999
'y001833'	'hexacosanoyl-CoA transport'	246.639	0.000205501	-6.07925	-0.999999
'y001835'	'hexadecanoate (n-C16:0) transport'	724.274	0.000186858	-6.58839	-1
'y001836'	'hexadecenoate (n-C16:1) transport'	246.639	0.000205501	-6.07925	-0.999999
'y001837'	'L-histidine transport, mitochondrial'	830.731	0.0313103	-4.42377	-0.999962
'y001839'	'hydrogen peroxide transport'	797.219	0.0129146	-4.7905	-0.999984
'y001840'	'hydroxymethylglutaryl-CoA transport'	823.35	0.0198769	-4.61724	-0.999976
'y001841'	'hypoxanthine exchange'	431.123	0.00148115	-5.464	-0.999997
'y001842'	'hypoxanthine transport'	999.897	0.0128893	-4.88973	-0.999987
'y001844'	'indole-3-acetaldehyde transport'	584.75	0.00154208	-5.57886	-0.999997
'y001851'	'IPC transport'	356.441	0.000255708	-6.14424	-0.999999
'y001852'	'IPC transport'	328.876	0.0365336	-3.95434	-0.999889
'y001853'	'IPC transport'	1000	0.0364098	-4.43878	-0.999964
'y001855'	'IPC transport'	999.822	0.000228802	-6.64046	-1
'y001856'	'IPC transport'	169.124	0.000211638	-5.90261	-0.999999
'y001857'	'IPC transport'	169.124	0.000211638	-5.90261	-0.999999
'y001858'	'IPC transport'	164.317	8.64977e-05	-6.27868	-0.999999
'y001859'	'IPC transport'	493.286	1.2299e-05	-7.60323	-1
'y001860'	'IPC transport'	164.426	1.20885e-05	-7.1336	-1
'y001861'	'iron(2+) exchange'	1000	0.155403	-3.80854	-0.999845
'y001862'	'isoamyl acetate exchange'	1000	0.0119572	-4.92237	-0.999988
'y001863'	'isoamyl alcohol transport'	172.631	0.000211638	-5.91153	-0.999999
'y001864'	'isoamyl alcohol transport'	1000	1.15981e-05	-7.93561	-1
'y001979'	'O2 transport'	557.631	0.0113942	-4.68966	-0.99998
'y001980'	'O2 transport'	640.44	0.0375561	-4.2318	-0.999941
'y001984'	'octanoate exchange'	660.304	0.000822586	-5.90456	-0.999999
'y001987'	'ornithine exchange'	1192.84	0.0483046	-4.39259	-0.99996
'y001988'	'oxaloacetate transport'	755.992	0.0243374	-4.49224	-0.999968
'y001992'	'oxygen exchange'	80.7781	4.22074e-05	-6.28191	-0.999999
'y001994'	'palmitoleate exchange'	446.363	0.000650077	-5.83672	-0.999999
'y001995'	'palmitoyl-CoA transport'	493.286	1.2299e-05	-7.60323	-1
'y002003'	'phenylacetaldehyde transport'	999.79	0.00918953	-5.03662	-0.999991
'y002008'	'phosphate transport'	246.639	0.000205501	-6.07925	-0.999999
'y002020'	'potassium exchange'	1223.02	0.00847161	-5.15947	-0.999993
'y002033'	'pyruvate exchange'	1000	0.00143504	-5.84314	-0.999999
'y002037'	'reduced thioredoxin transport'	443.679	0.0145844	-4.48318	-0.999967
'y002038'	'riboflavin exchange'	443.679	0.0152345	-4.46424	-0.999966
'y002039'	'riboflavin transport'	493.286	1.2299e-05	-7.60323	-1
'y002041'	'ribose transporter'	40.3891	2.11037e-05	-6.28191	-0.999999
'y002042'	'S-adenosyl-L-homocysteine transport'	708.253	0.0497671	-4.15325	-0.99993
'y002043'	'S-adenosyl-L-methionine exchange'	340.708	0.0252302	-4.13046	-0.999926
'y002057'	'succinate transport'	1723.7	0.0730638	-4.37276	-0.999958
'y002058'	'sucrose exchange'	2000	0.0986986	-4.30672	-0.999951
'y002060'	'sulphate exchange'	725.896	0.00144866	-5.69991	-0.999998
'y002061'	'sulphite exchange'	740.204	0.00409536	-5.25706	-0.999994
'y002062'	'taurine exchange'	446.916	0.00137517	-5.51187	-0.999997
'y002063'	'tetracosanoyl-CoA transport'	999.648	0.0205339	-4.68738	-0.999979
'y002066'	'thiamine(1+) diphosphate(1-) exchange'	714.212	0.0617021	-4.06353	-0.999914
'y002068'	'thiamine(1+) monophosphate exchange'	6.18674e-06	3.09284e-06	-0.301104	-0.500085
'y002072'	'threonine transport'	6.18674e-06	3.09284e-06	-0.301104	-0.500086
'y002073'	'thymidine exchange'	826.816	0.0408134	-4.30661	-0.999951
'y002075'	'thymidine transport'	1826.64	0.0253494	-4.85769	-0.999986
'y002079'	'trehalose transporter'	724.274	0.000186858	-6.58839	-1
'y002080'	'trehalose vacuolar transport'	348.197	0.00016051	-6.33632	-1
'y002085'	'tryptophol transport'	1000	0.00181548	-5.74101	-0.999998
'y002086'	'tyrosine transport'	1999.93	0.0253494	-4.89705	-0.999987
'y002087'	'tyrosine transport'	826.816	0.0408134	-4.30661	-0.999951
'y002090'	'uracil exchange'	242.369	0.0301384	-3.90536	-0.999876
'y002091'	'urea exchange'	242.371	0.0302636	-3.90356	-0.999875
'y002092'	'uridine exchange'	242.369	0.0291968	-3.91914	-0.99988
'y002093'	'valine transport'	242.369	0.0291968	-3.91914	-0.99988
'y002094'	'water diffusion'	242.334	0.000126622	-6.28191	-0.999999
'y002095'	'water diffusion'	0.00100881	1.00871e-07	-4.00004	-0.9999
'y002096'	'water diffusion'	0.00100881	1.00871e-07	-4.00004	-0.9999
'y002097'	'water diffusion'	499.895	0.000174468	-6.45716	-1
'y002098'	'water diffusion'	999.886	0.0083661	-5.07743	-0.999992
'y002100'	'water exchange'	493.286	1.2299e-05	-7.60323	-1
'y002107'	'zymosterol transport'	500	2.13561e-05	-7.36945	-1
'y002132'	'oxoglutarate/malate exchange'	500	2.13561e-05	-7.36945	-1
'y002186'	'laurate (n-C12:0) transport'	1000	0.0131384	-4.88146	-0.999987
'y002187'	'butyrate exchange'	1000	0.016665	-4.77819	-0.999983
'y002188'	'hexanoate exchange'	999.963	0.0152765	-4.81596	-0.999985
'y002190'	'butyrate (n-C4:0) transport'	1000	0.0230583	-4.63717	-0.999977
'y002192'	'octadecenoate (n-C18:1) transport'	1000	0.0291968	-4.53466	-0.999971
'y002193'	'myristate exchange'	1000	0.0265921	-4.57525	-0.999973
'y002213'	'fatty-acid--CoA ligase (behenate), ER membrane'	1000	0.00380322	-5.41985	-0.999996
'y002214'	'fatty-acid--CoA ligase (lignoceric acid), ER membrane'	1000	0.0108629	-4.96405	-0.999989
'y002215'	'fatty-acid--CoA ligase (cerotic acid), ER membrane'	1000	0.0137098	-4.86297	-0.999986
'y002216'	'fatty-acid--CoA ligase (behenate), lipid particle'	999.896	0.0443509	-4.35305	-0.999956
'y002217'	'fatty-acid--CoA ligase (lignoceric acid), lipid particle'	1000	0.016653	-4.77851	-0.999983
'y002219'	'fatty acyl-CoA transport via ABC system (C12:0)'	2000	0.00870064	-5.36148	-0.999996
'y002220'	'fatty acyl-CoA transport via ABC system (C14:0)'	999.896	0.0155098	-4.80935	-0.999984
'y002221'	'fatty acyl-CoA transport via ABC system (C16:0)'	1000	0.0165787	-4.78045	-0.999983
'y002222'	'fatty acyl-CoA transport via ABC system (C16:1)'	1000	0.022496	-4.6479	-0.999978
'y002223'	'fatty acyl-CoA transport via ABC system (C18:0)'	1000	0.016653	-4.77851	-0.999983
'y002225'	'fatty acyl-CoA transport via ABC system (C20:0)'	1000	0.0306358	-4.51377	-0.999969
'y002227'	'fatty acyl-CoA transport via ABC system (C24:0)'	236.315	0.000417471	-5.75287	-0.999998
'y002228'	'fatty acyl-CoA transport via ABC system (C26:0)'	420.738	0.0144851	-4.46309	-0.999966
'y002229'	'butyrate (n-C4:0) transport, cytoplasm-peroxisome'	422.453	0.000320669	-6.11972	-0.999999
'y002230'	'hexanoate (n-C6:0) transport, cytoplasm-peroxisome'	369.958	0.000133722	-6.44195	-1
'y002231'	'octadecenoate (n-C18:1) transport, cytoplasm-peroxisome'	499.895	0.000174468	-6.45716	-1
'y002232'	'peroxisomal acyl-CoA thioesterase (4:0)'	499.895	0.000174468	-6.45716	-1
'y002233'	'peroxisomal acyl-CoA thioesterase (6:0)'	1.09893e-05	5.49465e-06	-0.30103	-0.5
'y002234'	'peroxisomal acyl-CoA thioesterase (16:1)'	1.09893e-05	5.49371e-06	-0.301104	-0.500086
'y002235'	'peroxisomal acyl-CoA thioesterase (18:1)'	495.74	0.000896045	-5.74292	-0.999998
'y003508'	'laurate transport, cytoplasm-ER membrane'	495.74	0.000896045	-5.74292	-0.999998
'y003511'	'palmitoleate transport, cytoplasm-ER membrane'	285.927	0.000120753	-6.37436	-1
'y003512'	'stearate transport, cytoplasm-ER membrane'	1000	0.0100744	-4.99678	-0.99999
'y003513'	'oleate transport, cytoplasm-ER membrane'	1000	0.0100744	-4.99678	-0.99999
'y003514'	'malonyl-CoA transport, cytoplasm-ER membrane'	1000	0.0100744	-4.99678	-0.99999
'y003515'	'lauroyl-CoA transport, cytoplasm-ER membrane'	1000	0.0100744	-4.99678	-0.99999
'y003516'	'myristoyl-CoA transport, cytoplasm-ER membrane'	724.274	0.000424867	-6.23165	-0.999999
'y003517'	'palmitoyl-CoA transport, cytoplasm-ER membrane'	1000	0.0100744	-4.99678	-0.99999
'y003518'	'palmitoleoyl-CoA transport, cytoplasm-ER membrane'	2000	0.130514	-4.18537	-0.999935
'y003521'	'icosanoyl-CoA transport, cytoplasm-ER membrane'	295.967	0.00061052	-5.68554	-0.999998
'y003522'	'docosanoyl-CoA transport, cytoplasm-ER membrane'	164.317	0.000127075	-6.11162	-0.999999
'y003523'	'tetracosanoyl-CoA transport, cytoplasm-ER membrane'	116.066	1.21615e-05	-6.97972	-1
'y003524'	'hexacosanoyl-CoA transport, cytoplasm-ER membrane'	500	0.00119197	-5.6227	-0.999998
'y003525'	'H+ transport, cytoplasm-ER membrane'	1000	0.000926052	-6.03336	-0.999999
'y003526'	'H2O transport, cytoplasm-ER membrane'	500	0.00036202	-6.14024	-0.999999
'y003527'	'CO2 transport, cytoplasm-ER membrane'	2.01741e-07	1.00871e-07	-0.301031	-0.500001
'y003528'	'coenzyme A transport, cytoplasm-ER membrane'	500	0.00036202	-6.14024	-0.999999
'y003529'	'NADPH transport, cytoplasm-ER membrane'	116.072	4.69506e-05	-6.39309	-1
'y003530'	'NADP(+) transport, cytoplasm-ER membrane'	116.072	3.47891e-05	-6.52329	-1
'y003531'	'O2 transport, cytoplasm-ER membrane'	116.072	3.47891e-05	-6.52329	-1
'y003532'	'NADH transport, cytoplasm-ER membrane'	116.066	1.21615e-05	-6.97972	-1
'y003533'	'NAD transport, cytoplasm-ER membrane'	2.27968e-05	1.13984e-05	-0.30103	-0.5
'y003534'	'glycerol 3-phosphate transport, cytoplasm-ER membrane'	683.926	0.00115064	-5.77407	-0.999998
'y003535'	'dihydroxyacetone phosphate transport, cytoplasm-ER membrane'	1000	0.00941377	-5.02624	-0.999991
'y003537'	'phosphate transport, cytoplasm-ER membrane'	1000	0.175671	-3.7553	-0.999824
'y003538'	'CTP transport, cytoplasm-ER membrane'	1000	0.0193226	-4.71393	-0.999981
'y003539'	'CDP transport, cytoplasm-ER membrane'	827.258	0.000533765	-6.19029	-0.999999
'y003540'	'CMP transport, cytoplasm-ER membrane'	1000	0.0926647	-4.03309	-0.999907
'y003542'	'CDP-choline transport, cytoplasm-ER membrane'	1000	0.0118526	-4.92619	-0.999988
'y003543'	'ATP transport, cytoplasm-ER membrane'	1058.52	0.501672	-3.32428	-0.999526
'y003544'	'AMP transport, cytoplasm-ER membrane'	1717.28	0.546229	-3.49747	-0.999682
'y003545'	'L-serine transport, cytoplasm-ER membrane'	724.277	0.000177427	-6.61088	-1
'y003546'	'myo-inositol transport, cytoplasm-ER membrane'	116.066	1.21615e-05	-6.97972	-1
'y003547'	'S-adenosyl-L-methionine transport, cytoplasm-ER membrane'	116.066	1.21615e-05	-6.97972	-1
'y003548'	'S-adenosyl-L-homocysteine transport, cytoplasm-ER membrane'	6.18674e-06	3.09284e-06	-0.301104	-0.500086
'y003550'	'fecosterol transport, cytoplasm-ER membrane'	242.334	0.000126622	-6.28191	-0.999999
'y003553'	'zymosterol transport, cytoplasm-ER membrane'	999.822	0.000228802	-6.64046	-1
'y003570'	'sn-glycero-3-phosphocholine transport, ER membrane-cytoplasm'	164.317	0.000127075	-6.11162	-0.999999
'y003571'	'hexadecanoate (n-C16:0) transport, cytoplasm-lipid particle'	169.124	0.000211638	-5.90261	-0.999999
'y003572'	'hexadecenoate (n-C16:1) transport, cytoplasm-lipid particle'	169.124	0.000211638	-5.90261	-0.999999
'y003573'	'octadecanoate (n-C18:0) transport, cytoplasm-lipid particle'	164.317	0.000127075	-6.11162	-0.999999
'y003574'	'octadecenoate (n-C18:1) transport, cytoplasm-lipid particle'	172.631	0.000211638	-5.91153	-0.999999
'y003575'	'lauroyl-CoA transport, cytoplasm-lipid particle'	493.286	1.2299e-05	-7.60323	-1
'y003576'	'myristoyl-CoA transport, cytoplasm-lipid particle'	164.317	0.000127075	-6.11162	-0.999999
'y003577'	'palmitoyl-CoA transport, cytoplasm-lipid particle'	164.317	0.000127075	-6.11162	-0.999999
'y003578'	'palmitoleoyl-CoA transport, cytoplasm-lipid particle'	999.822	0.000352342	-6.45296	-1
'y003579'	'stearoyl-CoA transport, cytoplasm-lipid particle'	1000	0.0118526	-4.92619	-0.999988
'y003580'	'oleoyl-CoA transport, cytoplasm-lipid particle'	1000	0.0118526	-4.92619	-0.999988
'y003581'	'glycerol 3-phosphate transport, cytoplasm-lipid particle'	1000	0.0992255	-4.00338	-0.999901
'y003584'	'NADP(+) transport, cytoplasm-lipid particle'	1000	0.000377509	-6.42307	-1
'y003597'	'glycerol transport, lipid particle-cytoplasm'	295.967	0.00061052	-5.68554	-0.999998
'y003598'	'docosanoyl-CoA transport, lipid particle-cytoplasm'	281.864	0.000586446	-5.68181	-0.999998
'y003603'	'H+ transport, cytoplasm-cell envelope'	999.822	0.000228589	-6.64087	-1
'y003605'	'phosphate transport, cytoplasm-cell envelope'	999.822	0.000228802	-6.64046	-1
'y003610'	'stearate transport, cell envelope-cytoplasm'	509.72	0.000676066	-5.87734	-0.999999
'y003611'	'oleate transport, cell envelope-cytoplasm'	1000	0.126142	-3.89914	-0.999874
'y003612'	'icosanoyl-CoA transport, cell envelope-cytoplasm'	1000	0.456575	-3.34049	-0.999543
'y003614'	'tetracosanoyl-CoA transport, cell envelope-cytoplasm'	965.658	0.15301	-3.8001	-0.999842
'y003615'	'hexacosanoyl-CoA transport, cell envelope-cytoplasm'	1000	0.351343	-3.45427	-0.999649
'y003649'	'phosphate transport, cytoplasm-vacuolar membrane'	1000	0.022758	-4.64287	-0.999977
'y003662'	'H2O transport, cytoplasm-Golgi membrane'	999.822	0.000352342	-6.45296	-1
'y003663'	'phosphate transport, cytoplasm-Golgi membrane'	2.14631e-06	1.07297e-06	-0.301104	-0.500086
'y003665'	'carbon dioxide transport, cytoplasm-Golgi membrane'	4.25899e-06	2.12949e-06	-0.30103	-0.5
'y003667'	'ADP transport, cytoplasm-Golgi membrane'	2.11268e-06	1.05634e-06	-0.30103	-0.5
'y003669'	'carbon dioxide transport, cytoplasm-mitochondrial membrane'	672.502	0.033736	-4.2996	-0.99995
'y003670'	'palmitoleoyl-CoA transport, cytoplasm-mitochondrial membrane'	1000	0.00233806	-5.63114	-0.999998
'y003671'	'oleoyl-CoA transport, cytoplasm-mitochondrial membrane'	1159.38	0.0918318	-4.10123	-0.999921
'y003679'	'stearate transport, mitochondrial membrane-cytoplasm'	31.0441	6.06008e-06	-6.7095	-1
'y003681'	'laurate transport, ER membrane-lipid particle'	246.639	0.000205501	-6.07925	-0.999999
'y003682'	'myristate transport, ER membrane-lipid particle'	246.639	0.000205501	-6.07925	-0.999999
'y003683'	'lignoceric acid transport, ER membrane-lipid particle'	1945.58	5.67325e-06	-8.53522	-1
'y003718'	'fecosterol transport, ER membrane-lipid particle'	295.967	0.00061052	-5.68554	-0.999998
'y003719'	'lanosterol transport, ER membrane-lipid particle'	295.967	0.00061052	-5.68554	-0.999998
'y003725'	'fecosteryl palmitoleate transport, ER membrane-lipid particle'	1000	3.71742e-05	-7.42976	-1
'y003726'	'fecosteryl oleate transport, ER membrane-lipid particle'	1000	3.71742e-05	-7.42976	-1
'y003727'	'lanosteryl palmitoleate transport, ER membrane-lipid particle'	1000	3.71742e-05	-7.42976	-1
'y003728'	'lanosteryl oleate transport, ER membrane-lipid particle'	1000	3.71742e-05	-7.42976	-1
'y003730'	'zymosteryl oleate transport, ER membrane-lipid particle'	40.3891	2.11037e-05	-6.28191	-0.999999
'y003901'	'lignoceric acid transport, cell envelope-ER membrane'	40.3891	2.11037e-05	-6.28191	-0.999999
'y003902'	'cerotic acid transport, cell envelope-ER membrane'	500	0.0731074	-3.83501	-0.999854
'y003927'	'zymosteryl palmitoleate transport, ER membrane-cell envelope'	1000	0.00494435	-5.30589	-0.999995
'y003928'	'zymosteryl oleate transport, ER membrane-cell envelope'	527.272	0.000798224	-5.81991	-0.999998
'y003938'	'cerotic acid transport, ER membrane-ER'	683.926	0.00115064	-5.77407	-0.999998
'y003939'	'ergosterol transport, ER-ER membrane'	236.315	0.000417471	-5.75287	-0.999998
'y004038'	'triglyceride transport, ER membrane-cytoplasm'	999.903	0.0128893	-4.88973	-0.999987
'y004043'	'raffinose exchange'	823.304	0.0183957	-4.65084	-0.999978
'y004044'	'melibiose exchange'	823.35	0.0198769	-4.61724	-0.999976
'y103128'	'PI 3-P phosphatase'	2.14631e-06	1.07297e-06	-0.301104	-0.500085
'y103160'	'PI 4-P phosphatase'	2000	0.0308882	-4.81124	-0.999985
'y103168'	'PI 4-P phosphatase'	833.432	0.0308882	-4.43108	-0.999963
'y103208'	'PI 4,5-P2 phosphatase'	1101.54	0.0409682	-4.42955	-0.999963
'y103216'	'PI 3,5-P2 phosphatase'	451.351	0.000446106	-6.00508	-0.999999
'y103332'	'PA kinase, Golgi membrane'	951.001	0.000929267	-6.01004	-0.999999
'y103340'	'PA kinase, vacuolar membrane'	1004.48	0.289376	-3.54048	-0.999712
'y103554'	'diglyceride transport, cytoplasm-ER membrane'	493.286	1.2299e-05	-7.60323	-1
'y103562'	'1-phosphatidyl-1D-myo-inositol transport, cytoplasm-ER membrane'	164.426	1.20885e-05	-7.1336	-1
'y103632'	'1-phosphatidyl-1D-myo-inositol 4,5-bisphosphate transport, nucleus-cytoplasm'	1999.96	0.233087	-3.9335	-0.999883
'y103731'	'phosphatidylcholine transport, ER membrane-lipid particle'	2.27968e-05	1.13984e-05	-0.30103	-0.5
'y103747'	'1-acylglycerophosphocholine transport, ER membrane-lipid particle'	1000	0.174588	-3.75798	-0.999825
'y103751'	'1-acylglycerophosphoethanolamine transport, ER membrane-lipid particle'	999.963	0.0152765	-4.81596	-0.999985
'y103759'	'phosphatidate transport, ER membrane-mitochondrial membrane'	999.822	0.000352342	-6.45296	-1
'y103765'	'phosphatidyl-L-serine transport, ER membrane-mitochondrial membrane'	355.641	0.000312089	-6.05673	-0.999999
'y103773'	'phosphatidylethanolamine transport, mitochondrial membrane-ER membrane'	164.317	2.54516e-05	-6.80997	-1
'y103781'	'phosphatidylcholine transport, ER membrane-mitochondrial membrane'	1000	0.00254487	-5.59433	-0.999997
'y103789'	'diglyceride transport, ER membrane-Golgi membrane'	999.896	0.00253562	-5.59587	-0.999997
'y103797'	'phosphatidate transport, ER membrane-Golgi membrane'	1000	0.00732095	-5.13543	-0.999993
'y103805'	'1-phosphatidyl-1D-myo-inositol transport, ER membrane-Golgi membrane'	1000	0.00732095	-5.13543	-0.999993
'y103837'	'1-phosphatidyl-1D-myo-inositol transport, ER membrane-vacuolar membrane'	1999.88	0.0935974	-4.32974	-0.999953
'y103845'	'phosphatidyl-L-serine transport, ER membrane-vacuolar membrane'	500	0.0140272	-4.552	-0.999972
'y103853'	'phosphatidylethanolamine transport, vacuolar membrane-ER membrane'	1000	0.0140272	-4.85303	-0.999986
'y103861'	'1-phosphatidyl-1D-myo-inositol 3-phosphate transport, vacuolar membrane-ER membrane'	507.964	0.0277181	-4.26307	-0.999945
'y103869'	'1-phosphatidyl-1D-myo-inositol transport, ER membrane-cell envelope'	515.455	0.0277181	-4.26943	-0.999946
'y103893'	'phosphatidyl-L-serine transport, ER membrane-cell envelope'	434.564	0.000132756	-6.515	-1
'y103941'	'1-phosphatidyl-1D-myo-inositol 3-phosphate transport, vacuolar membrane-Golgi membrane'	356.441	0.000255708	-6.14424	-0.999999
'y103949'	'1-phosphatidyl-1D-myo-inositol 3,5-bisphosphate transport, vacuolar membrane-cell envelope'	246.639	0.000205501	-6.07925	-0.999999
'y300002'	'hexadecane transport e--c'	1000	0.329709	-3.48187	-0.99967
'y300012'	'fatty-acid--CoA ligase (octadecadienoate), peroxisome'	2000	0.0895141	-4.34914	-0.999955
'y300014'	'fatty acyl-CoA transport via ABC system (C18:2)'	2000	0.182628	-4.03946	-0.999909
'y300017'	'octadecenoate (n-C18:1) transport, cytoplasm-peroxisome'	997.494	0.0128925	-4.88857	-0.999987
'y300018'	'linoleoyl-CoA transport, cytoplasm-ER membrane'	1000	0.00972868	-5.01195	-0.99999
'y300019'	'linoleoyl-CoA transport, cytoplasm-lipid particle'	1000	0.0235057	-4.62883	-0.999976
'y300021'	'dodecane transport e--c'	1000	0.0344478	-4.46284	-0.999966
'y300030'	'Leucine transport'	2000	0.571525	-3.54399	-0.999714
'y300031'	'xanthine dehydrogenase'	296.086	0.238193	-3.09449	-0.999196
'y300034'	'OHCU decarboxylase'	2000	0.833235	-3.38026	-0.999583
'y300036'	'homogentisate 1,2-dioxygenase'	356.478	0.0363752	-3.99123	-0.999898
'y300037'	'maleylacetoacetate isomerase'	500	0.00166378	-5.47787	-0.999997
'y300038'	'fumarylacetoacetase'	500	0.0016609	-5.47863	-0.999997
'y300067'	'serine racemase'	31.0441	6.06008e-06	-6.7095	-1
'y300079'	'glycerol transport, mm - cy'	29.7604	3.16048e-06	-6.97389	-1
'y300082'	'EXC_OUT_m1824'	31.0441	6.06008e-06	-6.7095	-1
'DNA pseudoreaction'	'DNA pseudoreaction'	997.35	0.175671	-3.75415	-0.999824
'xPOOL_AC_LP_REV'	'Acyl-CoAs pool (reversible)'	1000	0.022758	-4.64287	-0.999977
'xPOOL_FA_EM_REV'	'Fatty acids pool (reversible)'	116.066	1.21615e-05	-6.97972	-1
'xPOOL_FA_EN_REV'	'Fatty acids pool (reversible)'	1000	30.6862	-1.51306	-0.969314
'xPOOL_FA_LP_REV'	'Fatty acids pool (reversible)'	1000	30.6862	-1.51306	-0.969314
'xPOOL_FA_MI_REV'	'Fatty acids pool (reversible)'	997.494	0.00352425	-5.45184	-0.999996
'xPOOL_FA_MM_REV'	'Fatty acids pool (reversible)'	827.258	0.000532867	-6.19102	-0.999999
'y000088_REV'	'5PP-IP5 pyrophosphorylation to 4,5-PP2-IP4 (reversible)'	999.896	0.0371151	-4.4304	-0.999963
'y000089_REV'	'5PP-IP5 pyrophosphorylation to 5,6-PP2-IP4 (reversible)'	117.21	8.64978e-05	-6.13196	-0.999999
'y000336_1_REV'	'diacylglycerol acyltransferase (reversible)'	997.494	0.0061721	-5.20848	-0.999994
'y000399_REV'	'fatty-acid--CoA ligase (decanoate) (reversible)'	184.972	0.000131794	-6.14721	-0.999999
'y000400_REV'	'fatty-acid--CoA ligase (dodecanoate) (reversible)'	498.747	0.00644623	-4.88857	-0.999987
'y000484_REV'	'glutathione peroxidase, mitochondria (reversible)'	791.89	0.00644623	-5.08936	-0.999992
'y001096_REV'	'(R)-mevalonate transport (reversible)'	208.648	0.000417471	-5.69879	-0.999998
'y001099_REV'	'2-oxoadipate and 2-oxoglutarate transport (reversible)'	999.79	0.0277181	-4.55715	-0.999972
'y001103_REV'	'5-formyltetrahydrofolic acid transport (reversible)'	523.133	0.000814498	-5.80772	-0.999998
'y001110_REV'	'ADP/ATP transporter (reversible)'	422.794	0.000775958	-5.73629	-0.999998
'y001112_REV'	'AKG transporter, mitochonrial (reversible)'	169.124	0.000211638	-5.90261	-0.999999
'y001122_REV'	'ceramide-2'' (sphinganine:n-C26:0OH) transport (reversible)'	438.451	0.00062239	-5.84786	-0.999999
'y001128_REV'	'citrate transport (reversible)'	368.14	0.000472061	-5.89202	-0.999999
'y001136_REV'	'D-lactate transport (reversible)'	246.639	0.000205501	-6.07925	-0.999999
'y001146_REV'	'episterol transport (reversible)'	236.302	0.00016051	-6.16797	-0.999999
'y001147_REV'	'ergosterol transport (reversible)'	269.052	0.000582051	-5.66488	-0.999998
'y001149_REV'	'ethanolamine transport (reversible)'	509.72	0.000676066	-5.87734	-0.999999
'y001161_REV'	'fecosterol transport (reversible)'	997.494	0.00192538	-5.71439	-0.999998
'y001164_REV'	'folic acid transport (reversible)'	669.184	0.0029489	-5.35589	-0.999996
'y001168_REV'	'glutathione transport (reversible)'	155.767	1.20789e-05	-7.11045	-1
'y001173_REV'	'glycine transport (reversible)'	281.864	0.000586446	-5.68181	-0.999998
'y001176_REV'	'guanine transport (reversible)'	511.672	0.000703672	-5.86162	-0.999999
'y001182_REV'	'isopentenyl diphosphate transport (reversible)'	40.3891	2.11037e-05	-6.28191	-0.999999
'y001183_REV'	'L-alanine transport (reversible)'	755.992	0.1552	-3.68763	-0.999795
'y001199_REV'	'L-glutamine transport (reversible)'	724.274	0.000424867	-6.23165	-0.999999
'y001201_REV'	'L-histidine transport (reversible)'	499.895	0.000174468	-6.45716	-1
'y001205_REV'	'L-isoleucine transport (reversible)'	455.317	0.000138505	-6.51685	-1
'y001206_REV'	'L-lactate transport (reversible)'	755.992	0.0621041	-4.0854	-0.999918
'y001211_REV'	'L-leucine transport (reversible)'	285.927	0.000120753	-6.37436	-1
'y001214_REV'	'L-methionine transport (reversible)'	116.066	1.33315e-05	-6.93982	-1
'y001215_REV'	'L-phenylalanine transport (reversible)'	1000	0.0235057	-4.62883	-0.999976
'y001216_REV'	'L-proline transport (reversible)'	1000	0.0013676	-5.86404	-0.999999
'y001217_REV'	'L-serine transport (reversible)'	1000	0.00053838	-6.26891	-0.999999
'y001219_REV'	'L-tryptophan transport (reversible)'	369.958	0.000133722	-6.44195	-1
'y001225_REV'	'lanosterol transport (reversible)'	1000	0.070235	-4.15345	-0.99993
'y001252_REV'	'putrescine transport (reversible)'	498.864	0.0557636	-3.95163	-0.999888
'y001253_REV'	'pyridoxine symport (reversible)'	500	0.0557636	-3.95262	-0.999888
'y001254_REV'	'pyruvate transport (reversible)'	683.926	0.00115064	-5.77407	-0.999998
'y001256_REV'	'S-adenosyl-L-methionine transport (reversible)'	683.926	0.00115064	-5.77407	-0.999998
'y001268_REV'	'taurine transport (reversible)'	422.453	0.000320669	-6.11972	-0.999999
'y001560_REV'	'1D-myo-inositol 1,3,4,5,6-pentakisphosphate diffusion (reversible)'	2000	0.247388	-3.90765	-0.999876
'y001567_REV'	'2-dehydro-3-deoxy-D-arabino-heptonate7-phohsphate transport (reversible)'	2.47414e-05	1.23707e-05	-0.30103	-0.5
'y001574_REV'	'2-isopropylmalate transport (reversible)'	356.441	0.000255708	-6.14424	-0.999999
'y001575_REV'	'2-methyl-1-butanol transport (reversible)'	285.927	0.000120753	-6.37436	-1
'y001579_REV'	'2-methylbutanal transport (reversible)'	743.942	0.0180714	-4.61455	-0.999976
'y001585_REV'	'2-oxobutanoate transporter (reversible)'	1000	1.15981e-05	-7.93561	-1
'y001590_REV'	'2-phenylethanol transport (reversible)'	296.086	0.238193	-3.09449	-0.999196
'y001591_REV'	'2-phenylethanol transport (reversible)'	285.927	0.000120753	-6.37436	-1
'y001595_REV'	'3-carboxy-4-methyl-2-oxopentanoate transport (reversible)'	372.734	0.000659262	-5.75234	-0.999998
'y001596_REV'	'3-methyl-2-oxopentanoate transport (reversible)'	372.734	0.000659262	-5.75234	-0.999998
'y001599_REV'	'3-methylbutanal transport (reversible)'	382.418	0.0560955	-3.83361	-0.999853
'y001600_REV'	'3-methylbutanal transport (reversible)'	430.349	0.000622231	-5.83987	-0.999999
'y001601_REV'	'3-octaprenyl-4-hydroxybenzoate transport (reversible)'	430.349	0.000622231	-5.83987	-0.999999
'y001605_REV'	'4-aminobenzoate transport (reversible)'	424.471	0.000650077	-5.81488	-0.999998
'y001606_REV'	'4-aminobenzoate transport (reversible)'	424.471	0.000650077	-5.81488	-0.999998
'y001607_REV'	'4-aminobutanal transport (reversible)'	430.349	0.000622231	-5.83987	-0.999999
'y001608_REV'	'4-aminobutyrate transport (reversible)'	430.349	0.000622231	-5.83987	-0.999999
'y001609_REV'	'4-hydroxy-2-oxoglutarate transport (reversible)'	506.742	0.000738378	-5.83651	-0.999999
'y001610_REV'	'4-hydroxy-2-oxoglutarate transport (reversible)'	505.835	0.000702662	-5.85726	-0.999999
'y001611_REV'	'4-hydroxybenzoate transport (reversible)'	446.409	0.0145844	-4.48584	-0.999967
'y001622_REV'	'5-aminolevulinate transport (reversible)'	493.525	0.000866919	-5.75533	-0.999998
'y001633_REV'	'acetaldehyde transport (reversible)'	295.967	0.000585896	-5.70342	-0.999998
'y001634_REV'	'acetate exchange (reversible)'	295.967	0.000585896	-5.70342	-0.999998
'y001635_REV'	'acetate transport (reversible)'	295.967	0.000585896	-5.70342	-0.999998
'y001637_REV'	'acetyl-CoA transport (reversible)'	340.708	0.0252302	-4.13046	-0.999926
'y001640_REV'	'adenine transport (reversible)'	1200.23	0.0493249	-4.3862	-0.999959
'y001644_REV'	'ADP transport (reversible)'	356.441	0.00048782	-5.86373	-0.999999
'y001645_REV'	'ADP transport (reversible)'	356.441	0.00048782	-5.86373	-0.999999
'y001647_REV'	'AKG transporter, peroxisome (reversible)'	362.556	0.00047197	-5.88546	-0.999999
'y001654_REV'	'ammonium exchange (reversible)'	235.165	8.63033e-06	-7.43534	-1
'y001656_REV'	'AMP transport (reversible)'	235.165	8.63033e-06	-7.43534	-1
'y001668_REV'	'bicarbonate formation (reversible)'	999.822	0.000228589	-6.64087	-1
'y001680_REV'	'ceramide transport (reversible)'	122.044	8.64851e-05	-6.14957	-0.999999
'y001681_REV'	'ceramide transport (reversible)'	1000	0.0477995	-4.32058	-0.999952
'y001684_REV'	'choline transport (reversible)'	1000	0.246572	-3.60806	-0.999753
'y001686_REV'	'citrate transport (reversible)'	1000	0.0477995	-4.32058	-0.999952
'y001691_REV'	'CO2 transport (reversible)'	1000	0.236971	-3.62531	-0.999763
'y001696_REV'	'CO2 transport (reversible)'	816.46	0.00184813	-5.6452	-0.999998
'y001707_REV'	'D-arabinose transport (reversible)'	1000	0.00732095	-5.13543	-0.999993
'y001708_REV'	'D-erythrose 4-phosphate transport (reversible)'	1000	3.71742e-05	-7.42976	-1
'y001714_REV'	'D-glucose exchange (reversible)'	446.916	0.00137517	-5.51187	-0.999997
'y001720_REV'	'dADP transport (reversible)'	451.351	0.000446106	-6.00508	-0.999999
'y001737_REV'	'dGDP transport (reversible)'	997.494	0.0128925	-4.88857	-0.999987
'y001746_REV'	'dihydroxyacetone phosphate transport (reversible)'	446.916	0.00137517	-5.51187	-0.999997
'y001747_REV'	'diphosphate transport (reversible)'	1000	0.00732095	-5.13543	-0.999993
'y001748_REV'	'dolichol phosphate transport (reversible)'	1000	3.71742e-05	-7.42976	-1
'y001763_REV'	'ethanol transport, mitochondrial (reversible)'	1000	0.363843	-3.43909	-0.999636
'y001766_REV'	'farnesyl diphosphate transport (reversible)'	816.46	0.00184813	-5.6452	-0.999998
'y001770_REV'	'fatty acid transport (reversible)'	816.46	0.00184813	-5.6452	-0.999998
'y001801_REV'	'GDP transport (reversible)'	724.277	0.000177427	-6.61088	-1
'y001802_REV'	'GDP transport (reversible)'	462.753	0.00371251	-5.09568	-0.999992
'y001803_REV'	'GDP-alpha-D-mannose transport (reversible)'	462.753	0.00371251	-5.09568	-0.999992
'y001812_REV'	'glycoaldehyde transport (reversible)'	999.648	0.295126	-3.52984	-0.999705
'y001813_REV'	'glycoaldehyde transport (reversible)'	1000	0.656635	-3.18268	-0.999343
'y001816_REV'	'glyoxylate transport (reversible)'	935.805	5.34416e-05	-7.24331	-1
'y001819_REV'	'guanine transport (reversible)'	724.274	0.00146169	-5.69505	-0.999998
'y001826_REV'	'H+ diffusion (reversible)'	1000	0.0218664	-4.66022	-0.999978
'y001827_REV'	'H+ diffusion (reversible)'	1000	0.00750843	-5.12445	-0.999992
'y001832_REV'	'H+ exchange (reversible)'	296.086	0.238193	-3.09449	-0.999196
'y001839_REV'	'hydrogen peroxide transport (reversible)'	997.35	0.175671	-3.75415	-0.999824
'y001853_REV'	'IPC transport (reversible)'	89.6869	0.000347041	-5.41235	-0.999996
'y001854_REV'	'IPC transport (reversible)'	2.14631e-06	1.07297e-06	-0.301104	-0.500085
'y001863_REV'	'isoamyl alcohol transport (reversible)'	452.685	0.0271368	-4.22224	-0.99994
'y001864_REV'	'isoamyl alcohol transport (reversible)'	1000	0.00972868	-5.01195	-0.99999
'y001868_REV'	'isobutyl alcohol transport (reversible)'	6.18674e-06	3.09337e-06	-0.30103	-0.5
'y001876_REV'	'L-arabinitol transport (reversible)'	1000	0.00732095	-5.13543	-0.999993
'y001877_REV'	'L-arabinoase transport (reversible)'	1000	0.00732095	-5.13543	-0.999993
'y001884_REV'	'L-erythro-4-hydroxyglutamate transport (reversible)'	31.0441	6.06008e-06	-6.7095	-1
'y001885_REV'	'L-erythro-4-hydroxyglutamate transport (reversible)'	29.7604	3.16048e-06	-6.97389	-1
'y001887_REV'	'L-glutamate 5-semialdehyde dehydratase (reversible)'	29.7604	3.16048e-06	-6.97389	-1
'y001892_REV'	'L-glutamine transport (reversible)'	1000	0.00117215	-5.93102	-0.999999
'y001901_REV'	'L-malate transport (reversible)'	1000	0.476063	-3.32234	-0.999524
'y001905_REV'	'L-proline transport (reversible)'	1000	0.83853	-3.07648	-0.999161
'y001907_REV'	'L-serine transport (reversible)'	1000	0.246572	-3.60806	-0.999753
'y001921_REV'	'M(IP)2C transport (reversible)'	89.6869	0.000347041	-5.41235	-0.999996
'y001922_REV'	'M(IP)2C transport (reversible)'	796.474	0.000383011	-6.31796	-1
'y001923_REV'	'M(IP)2C transport (reversible)'	1296.47	0.000526567	-6.39131	-1
'y001924_REV'	'M(IP)2C transport (reversible)'	1240.12	0.00136259	-5.9591	-0.999999
'y001925_REV'	'M(IP)2C transport (reversible)'	724.274	0.000213681	-6.53014	-1
'y001926_REV'	'M(IP)2C transport (reversible)'	92.4896	0.000245326	-5.57635	-0.999997
'y001927_REV'	'M(IP)2C transport (reversible)'	84.5619	0.000427299	-5.29644	-0.999995
'y001928_REV'	'M(IP)2C transport (reversible)'	31.0441	6.06008e-06	-6.7095	-1
'y001932_REV'	'mannan transport (reversible)'	1000	0.00398085	-5.40002	-0.999996
'y001937_REV'	'MIPC transport (reversible)'	826.816	0.0241127	-4.53516	-0.999971
'y001938_REV'	'MIPC transport (reversible)'	1000	0.00398085	-5.40002	-0.999996
'y001939_REV'	'MIPC transport (reversible)'	649.642	0.0201529	-4.50834	-0.999969
'y001940_REV'	'MIPC transport (reversible)'	649.642	0.0201529	-4.50834	-0.999969
'y001945_REV'	'MIPC transport (reversible)'	902.703	0.000892212	-6.00508	-0.999999
'y001964_REV'	'NADPH transport (reversible)'	452.671	4.84325e-05	-6.97065	-1
'y001965_REV'	'NH3 transport (reversible)'	452.685	0.0269009	-4.22603	-0.999941
'y001966_REV'	'nicotinamide diffusion (reversible)'	997.494	0.00352425	-5.45184	-0.999996
'y001970_REV'	'NMN transport (reversible)'	1849.73	0.0341266	-4.73402	-0.999982
'y001979_REV'	'O2 transport (reversible)'	987.082	0.00530953	-5.2693	-0.999995
'y001980_REV'	'O2 transport (reversible)'	987.082	0.00530953	-5.2693	-0.999995
'y001981_REV'	'octadecanoate (n-C18:0) transport (reversible)'	446.916	0.00137517	-5.51187	-0.999997
'y001988_REV'	'oxaloacetate transport (reversible)'	117.21	8.64978e-05	-6.13196	-0.999999
'y002002_REV'	'phenylacetaldehyde transport (reversible)'	1000	30.6862	-1.51306	-0.969314
'y002003_REV'	'phenylacetaldehyde transport (reversible)'	1059.5	9.5649e-05	-7.04442	-1
'y002005_REV'	'phosphate exchange (reversible)'	1000	0.0280543	-4.552	-0.999972
'y002008_REV'	'phosphate transport (reversible)'	1111.7	0.0148012	-4.87569	-0.999987
'y002022_REV'	'protoporphyrinogen IX transport (reversible)'	826.601	0.0025749	-5.50654	-0.999997
'y002023_REV'	'PRPP transport (reversible)'	2000	0.0280543	-4.85303	-0.999986
'y002032_REV'	'pyrophosphate transport (reversible)'	3848.5	0.585479	-3.81778	-0.999848
'y002036_REV'	'quinolinate transport (reversible)'	935.805	5.34416e-05	-7.24331	-1
'y002042_REV'	'S-adenosyl-L-homocysteine transport (reversible)'	82.213	0.000444862	-5.26671	-0.999995
'y002045_REV'	'serine transport (reversible)'	79.991	0.000215699	-5.56919	-0.999997
'y002053_REV'	'squalene transport (reversible)'	246.639	0.000205501	-6.07925	-0.999999
'y002057_REV'	'succinate transport (reversible)'	356.478	0.0363752	-3.99123	-0.999898
'y002060_REV'	'sulphate exchange (reversible)'	139.273	0.000127075	-6.03981	-0.999999
'y002063_REV'	'tetracosanoyl-CoA transport (reversible)'	139.273	0.000127075	-6.03981	-0.999999
'y002079_REV'	'trehalose transporter (reversible)'	155.772	1.20885e-05	-7.11012	-1
'y002080_REV'	'trehalose vacuolar transport (reversible)'	164.426	1.20784e-05	-7.13396	-1
'y002084_REV'	'tryptophol transport (reversible)'	155.772	1.20885e-05	-7.11012	-1
'y002093_REV'	'valine transport (reversible)'	1000	1.15981e-05	-7.93561	-1
'y002139_REV'	'ergosta-5,7,22,24(28)-tetraen-3beta-ol transport (reversible)'	362.556	0.00047197	-5.88546	-0.999999
'y002148_REV'	'3-hydroxyacyl-thioester dehydratase (trans-but-2-enoyl-ACP) (reversible)'	362.556	0.00047197	-5.88546	-0.999999
'y002149_REV'	'3-hydroxyacyl-thioester dehydratase (trans-hex-2-enoyl-ACP) (reversible)'	362.556	0.00047197	-5.88546	-0.999999
'y002150_REV'	'3-hydroxyacyl-thioester dehydratase (trans-oct-2-enoyl-ACP) (reversible)'	505.835	0.000702662	-5.85726	-0.999999
'y002185_REV'	'decanoate (n-C10:0) transport (reversible)'	505.835	0.000702662	-5.85726	-0.999999
'y002186_REV'	'laurate (n-C12:0) transport (reversible)'	505.835	0.000702662	-5.85726	-0.999999
'y002190_REV'	'butyrate (n-C4:0) transport (reversible)'	506.742	0.000738378	-5.83651	-0.999999
'y002191_REV'	'hexanoate (n-C6:0) transport (reversible)'	997.494	0.0061721	-5.20848	-0.999994
'y002192_REV'	'octadecenoate (n-C18:1) transport (reversible)'	999.79	0.00918953	-5.03662	-0.999991
'y002217_REV'	'fatty-acid--CoA ligase (lignoceric acid), lipid particle (reversible)'	184.972	0.000131794	-6.14721	-0.999999
'y002218_REV'	'fatty-acid--CoA ligase (cerotic acid), lipid particle (reversible)'	498.747	0.00644623	-4.88857	-0.999987
'y002229_REV'	'butyrate (n-C4:0) transport, cytoplasm-peroxisome (reversible)'	791.89	0.00644623	-5.08936	-0.999992
'y002230_REV'	'hexanoate (n-C6:0) transport, cytoplasm-peroxisome (reversible)'	1000	0.0344478	-4.46284	-0.999966
'y002231_REV'	'octadecenoate (n-C18:1) transport, cytoplasm-peroxisome (reversible)'	208.648	0.000417471	-5.69879	-0.999998
'y003511_REV'	'palmitoleate transport, cytoplasm-ER membrane (reversible)'	509.72	0.000676066	-5.87734	-0.999999
'y003512_REV'	'stearate transport, cytoplasm-ER membrane (reversible)'	523.133	0.000814498	-5.80772	-0.999998
'y003514_REV'	'malonyl-CoA transport, cytoplasm-ER membrane (reversible)'	422.794	0.000775958	-5.73629	-0.999998
'y003516_REV'	'myristoyl-CoA transport, cytoplasm-ER membrane (reversible)'	169.124	0.000211638	-5.90261	-0.999999
'y003517_REV'	'palmitoyl-CoA transport, cytoplasm-ER membrane (reversible)'	671.809	0.00364664	-5.26535	-0.999995
'y003518_REV'	'palmitoleoyl-CoA transport, cytoplasm-ER membrane (reversible)'	671.809	0.00364664	-5.26535	-0.999995
'y003519_REV'	'stearoyl-CoA transport, cytoplasm-ER membrane (reversible)'	438.451	0.00062239	-5.84786	-0.999999
'y003520_REV'	'oleoyl-CoA transport, cytoplasm-ER membrane (reversible)'	755.992	0.0243374	-4.49224	-0.999968
'y003521_REV'	'icosanoyl-CoA transport, cytoplasm-ER membrane (reversible)'	368.14	0.000472061	-5.89202	-0.999999
'y003522_REV'	'docosanoyl-CoA transport, cytoplasm-ER membrane (reversible)'	246.639	0.000205501	-6.07925	-0.999999
'y003524_REV'	'hexacosanoyl-CoA transport, cytoplasm-ER membrane (reversible)'	236.302	0.00016051	-6.16797	-0.999999
'y003525_REV'	'H+ transport, cytoplasm-ER membrane (reversible)'	269.052	0.000582051	-5.66488	-0.999998
'y003526_REV'	'H2O transport, cytoplasm-ER membrane (reversible)'	509.72	0.000676066	-5.87734	-0.999999
'y003528_REV'	'coenzyme A transport, cytoplasm-ER membrane (reversible)'	997.494	0.00192538	-5.71439	-0.999998
'y003533_REV'	'NAD transport, cytoplasm-ER membrane (reversible)'	669.184	0.0029489	-5.35589	-0.999996
'y003534_REV'	'glycerol 3-phosphate transport, cytoplasm-ER membrane (reversible)'	155.767	1.20789e-05	-7.11045	-1
'y003535_REV'	'dihydroxyacetone phosphate transport, cytoplasm-ER membrane (reversible)'	281.864	0.000586446	-5.68181	-0.999998
'y003536_REV'	'diphosphate transport, cytoplasm-ER membrane (reversible)'	511.672	0.000703672	-5.86162	-0.999999
'y003537_REV'	'phosphate transport, cytoplasm-ER membrane (reversible)'	40.3891	2.11037e-05	-6.28191	-0.999999
'y003538_REV'	'CTP transport, cytoplasm-ER membrane (reversible)'	87.049	0.000383011	-5.35655	-0.999996
'y003550_REV'	'fecosterol transport, cytoplasm-ER membrane (reversible)'	844.256	0.00240343	-5.54564	-0.999997
'y003552_REV'	'ergosterol transport, cytoplasm-ER membrane (reversible)'	6.18674e-06	3.09284e-06	-0.301104	-0.500086
'y003581_REV'	'glycerol 3-phosphate transport, cytoplasm-lipid particle (reversible)'	59.5207	2.11037e-05	-6.45031	-1
'y003582_REV'	'dihydroxyacetone phosphate transport, cytoplasm-lipid particle (reversible)'	59.5207	2.11037e-05	-6.45031	-1
'y003583_REV'	'NADPH transport, cytoplasm-lipid particle (reversible)'	913.303	0.0383667	-4.37666	-0.999958
'y003598_REV'	'docosanoyl-CoA transport, lipid particle-cytoplasm (reversible)'	1000	0.0344478	-4.46284	-0.999966
'y003599_REV'	'tetracosanoyl-CoA transport, lipid particle-cytoplasm (reversible)'	40.3891	2.11037e-05	-6.28191	-0.999999
'y003600_REV'	'hexacosanoyl-CoA transport, lipid particle-cytoplasm (reversible)'	250	0.0442538	-3.75199	-0.999823
'y003601_REV'	'ATP transport, cytoplasm-cell envelope (reversible)'	999.897	0.155884	-3.80715	-0.999844
'y003602_REV'	'ADP transport, cytoplasm-cell envelope (reversible)'	584.75	0.00141167	-5.61724	-0.999998
'y003603_REV'	'H+ transport, cytoplasm-cell envelope (reversible)'	72.187	0.000391691	-5.26552	-0.999995
'y003604_REV'	'H2O transport, cytoplasm-cell envelope (reversible)'	92.4896	0.000245326	-5.57635	-0.999997
'y003605_REV'	'phosphate transport, cytoplasm-cell envelope (reversible)'	455.317	0.000138505	-6.51685	-1
'y003606_REV'	'sn-glycero-3-phosphocholine transport, cell envelope-cytoplasm (reversible)'	649.642	0.0126462	-4.71072	-0.999981
'y003607_REV'	'1-(sn-glycero-3-phospho)-1D-myo-inositol transport, cell envelope-cytoplasm (reversible)'	649.642	0.0126462	-4.71072	-0.999981
'y003608_REV'	'palmitate transport, cell envelope-cytoplasm (reversible)'	584.75	0.00154208	-5.57886	-0.999997
'y003609_REV'	'palmitoleate transport, cell envelope-cytoplasm (reversible)'	999.897	0.110157	-3.95794	-0.99989
'y003610_REV'	'stearate transport, cell envelope-cytoplasm (reversible)'	82.213	0.000444862	-5.26671	-0.999995
'y003611_REV'	'oleate transport, cell envelope-cytoplasm (reversible)'	79.991	0.000215699	-5.56919	-0.999997
'y003614_REV'	'tetracosanoyl-CoA transport, cell envelope-cytoplasm (reversible)'	269.061	0.00061052	-5.64415	-0.999998
'y003615_REV'	'hexacosanoyl-CoA transport, cell envelope-cytoplasm (reversible)'	269.061	0.00061052	-5.64415	-0.999998
'y003648_REV'	'H2O transport, cytoplasm-vacuolar membrane (reversible)'	295.967	0.000585896	-5.70342	-0.999998
'y003650_REV'	'H+ transport, cytoplasm-vacuolar membrane (reversible)'	116.066	1.33315e-05	-6.93982	-1
'y003663_REV'	'phosphate transport, cytoplasm-Golgi membrane (reversible)'	369.958	0.000133722	-6.44195	-1
'y003666_REV'	'ATP transport, cytoplasm-Golgi membrane (reversible)'	1833.22	0.0539992	-4.53083	-0.999971
'y003667_REV'	'ADP transport, cytoplasm-Golgi membrane (reversible)'	1000	0.070235	-4.15345	-0.99993
'y003668_REV'	'H2O transport, cytoplasm-mitochondrial membrane (reversible)'	1000	0.165735	-3.78059	-0.999834
'y003670_REV'	'palmitoleoyl-CoA transport, cytoplasm-mitochondrial membrane (reversible)'	584.75	0.00154208	-5.57886	-0.999997
'y003684_REV'	'cerotic acid transport, ER membrane-lipid particle (reversible)'	1349.73	0.0379142	-4.55145	-0.999972
'y003717_REV'	'episterol transport, ER membrane-lipid particle (reversible)'	116.066	1.21615e-05	-6.97972	-1
'y003721_REV'	'ergosteryl palmitoleate transport, ER membrane-lipid particle (reversible)'	40.3891	2.11037e-05	-6.28191	-0.999999
'y003722_REV'	'ergosteryl oleate transport, ER membrane-lipid particle (reversible)'	40.3891	2.11037e-05	-6.28191	-0.999999
'y003723_REV'	'episteryl palmitoleate transport, ER membrane-lipid particle (reversible)'	72.187	0.000391691	-5.26552	-0.999995
'y003724_REV'	'episteryl oleate transport, ER membrane-lipid particle (reversible)'	578.536	0.0556766	-4.01666	-0.999904
'y003725_REV'	'fecosteryl palmitoleate transport, ER membrane-lipid particle (reversible)'	578.536	0.0556766	-4.01666	-0.999904
'y003727_REV'	'lanosteryl palmitoleate transport, ER membrane-lipid particle (reversible)'	683.926	0.00115064	-5.77407	-0.999998
'y003728_REV'	'lanosteryl oleate transport, ER membrane-lipid particle (reversible)'	683.926	0.00115064	-5.77407	-0.999998
'y003730_REV'	'zymosteryl oleate transport, ER membrane-lipid particle (reversible)'	935.805	5.34416e-05	-7.24331	-1
'y003928_REV'	'zymosteryl oleate transport, ER membrane-cell envelope (reversible)'	443.679	0.0152345	-4.46424	-0.999966
'y003939_REV'	'ergosterol transport, ER-ER membrane (reversible)'	451.351	0.000446106	-6.00508	-0.999999
'y003957_REV'	'H+ transport, mitochondrion-mitochondrial membrane (reversible)'	451.351	0.000446106	-6.00508	-0.999999
'y003959_REV'	'CMP transport, mitochondrion-mitochondrial membrane (reversible)'	164.426	1.20784e-05	-7.13396	-1
'y003960_REV'	'CTP transport, mitochondrion-mitochondrial membrane (reversible)'	164.426	1.20784e-05	-7.13396	-1
'y003961_REV'	'phosphate transport, mitochondrion-mitochondrial membrane (reversible)'	164.426	1.20784e-05	-7.13396	-1
'y004038_REV'	'triglyceride transport, ER membrane-cytoplasm (reversible)'	422.453	0.000320669	-6.11972	-0.999999
'y102462_REV'	'lysoPI acyltransferase, ER membrane (reversible)'	515.455	0.0277181	-4.26943	-0.999946
'y103332_REV'	'PA kinase, Golgi membrane (reversible)'	1040.38	9.5452e-05	-7.03741	-1
'y103554_REV'	'diglyceride transport, cytoplasm-ER membrane (reversible)'	2000	0.377277	-3.72437	-0.999811
'y103588_REV'	'diglyceride transport, cytoplasm-lipid particle (reversible)'	1584.75	0.0118722	-5.12543	-0.999993
'y103616_REV'	'1-phosphatidyl-1D-myo-inositol 4,5-bisphosphate transport, cell envelope-cytoplasm (reversible)'	827.258	0.000532867	-6.19102	-0.999999
'y103624_REV'	'1-phosphatidyl-1D-myo-inositol 4-phosphate transport, cell envelope-cytoplasm (reversible)'	2000	0.247388	-3.90765	-0.999876
'y103632_REV'	'1-phosphatidyl-1D-myo-inositol 4,5-bisphosphate transport, nucleus-cytoplasm (reversible)'	122.044	8.64851e-05	-6.14957	-0.999999
'y103747_REV'	'1-acylglycerophosphocholine transport, ER membrane-lipid particle (reversible)'	5.60393e-05	2.80197e-05	-0.30103	-0.5
'y103755_REV'	'phosphatidate transport, lipid particle-ER membrane (reversible)'	1000	0.748083	-3.12605	-0.999252
'y103759_REV'	'phosphatidate transport, ER membrane-mitochondrial membrane (reversible)'	1000	0.0129146	-4.88892	-0.999987
'y103765_REV'	'phosphatidyl-L-serine transport, ER membrane-mitochondrial membrane (reversible)'	2000	0.123483	-4.20942	-0.999938
'y103773_REV'	'phosphatidylethanolamine transport, mitochondrial membrane-ER membrane (reversible)'	164.426	1.20798e-05	-7.13391	-1
'y103781_REV'	'phosphatidylcholine transport, ER membrane-mitochondrial membrane (reversible)'	1999.96	0.123483	-4.20941	-0.999938
'y103797_REV'	'phosphatidate transport, ER membrane-Golgi membrane (reversible)'	1000	0.0193226	-4.71393	-0.999981
'y103805_REV'	'1-phosphatidyl-1D-myo-inositol transport, ER membrane-Golgi membrane (reversible)'	422.68	0.03666	-4.06182	-0.999913
'y103821_REV'	'phosphatidylethanolamine transport, Golgi membrane-ER membrane (reversible)'	37.6969	1.53528e-05	-6.39012	-1
'y103829_REV'	'phosphatidate transport, ER membrane-vacuolar membrane (reversible)'	37.6969	1.53528e-05	-6.39012	-1
'y103837_REV'	'1-phosphatidyl-1D-myo-inositol transport, ER membrane-vacuolar membrane (reversible)'	29.8727	3.17866e-06	-6.97303	-1
'y103845_REV'	'phosphatidyl-L-serine transport, ER membrane-vacuolar membrane (reversible)'	29.8727	3.17866e-06	-6.97303	-1
'y103853_REV'	'phosphatidylethanolamine transport, vacuolar membrane-ER membrane (reversible)'	102.089	0.000797746	-5.10711	-0.999992
'y103861_REV'	'1-phosphatidyl-1D-myo-inositol 3-phosphate transport, vacuolar membrane-ER membrane (reversible)'	87.0788	0.000701024	-5.09418	-0.999992
'y300001_REV'	'decane transport e--c (reversible)'	500	4.96341e-05	-7.00319	-1
'y300002_REV'	'hexadecane transport e--c (reversible)'	500	1.28062e-05	-7.59155	-1
'y300012_REV'	'fatty-acid--CoA ligase (octadecadienoate), peroxisome (reversible)'	379.162	5.10942e-05	-6.87045	-1
'y300015_REV'	'isocitrate transport (reversible)'	379.146	4.92599e-05	-6.88631	-1
'y300016_REV'	'octadecenoate (n-C18:1) transport (reversible)'	230.196	2.47978e-05	-6.96768	-1
'y300017_REV'	'octadecenoate (n-C18:1) transport, cytoplasm-peroxisome (reversible)'	164.985	1.65367e-05	-6.999	-1
'y300018_REV'	'linoleoyl-CoA transport, cytoplasm-ER membrane (reversible)'	125	1.2404e-05	-7.00335	-1
'y300019_REV'	'linoleoyl-CoA transport, cytoplasm-lipid particle (reversible)'	500	4.96341e-05	-7.00319	-1
'y300020_REV'	'linoleoyl-CoA transport, cytoplasm-mitochondrial membrane (reversible)'	500	1.28062e-05	-7.59155	-1
'y300021_REV'	'dodecane transport e--c (reversible)'	379.162	5.10942e-05	-6.87045	-1
'y300028_REV'	'octadecenoate (n-C18:1) transport (reversible)'	379.146	4.92599e-05	-6.88631	-1
'y300034_REV'	'OHCU decarboxylase (reversible)'	230.196	2.47978e-05	-6.96768	-1
'y300037_REV'	'maleylacetoacetate isomerase (reversible)'	164.985	1.65367e-05	-6.999	-1
'y300039_REV'	'erythrose kinase (reversible)'	125	1.2404e-05	-7.00335	-1
'y300040_REV'	'erythrose reductase (reversible)'	500	4.96341e-05	-7.00319	-1
'y300041_REV'	'erythritol transport extracellular (reversible)'	500	1.28062e-05	-7.59155	-1
'y300042_REV'	'arabinitol dehydrogenase (reversible)'	379.162	5.10942e-05	-6.87045	-1
'y300043_REV'	'mannitol transport extracellular (reversible)'	379.146	4.92599e-05	-6.88631	-1
'y300067_REV'	'serine racemase (reversible)'	230.196	2.47978e-05	-6.96768	-1
'y300076_REV'	'dihydrofolate:NADP+ oxidoreductase (reversible)'	164.985	1.65367e-05	-6.999	-1
'y300077_REV'	'dihydrofolate:NADP+ oxidoreductase (reversible)'	125	1.2404e-05	-7.00335	-1
'y300079_REV'	'glycerol transport, mm - cy (reversible)'	500	4.96341e-05	-7.00319	-1
'arm_y000001'	'(R)-lactate:ferricytochrome-c 2-oxidoreductase (arm)'	500	1.28062e-05	-7.59155	-1
'y000001No1'	'(R)-lactate:ferricytochrome-c 2-oxidoreductase (No1)'	379.162	5.10942e-05	-6.87045	-1
'y000001No2'	'(R)-lactate:ferricytochrome-c 2-oxidoreductase (No2)'	379.146	4.92599e-05	-6.88631	-1
'arm_y000002'	'(R)-lactate:ferricytochrome-c 2-oxidoreductase (arm)'	230.196	2.47978e-05	-6.96768	-1
'y000002No1'	'(R)-lactate:ferricytochrome-c 2-oxidoreductase (No1)'	164.985	1.65367e-05	-6.999	-1
'y000002No2'	'(R)-lactate:ferricytochrome-c 2-oxidoreductase (No2)'	125	1.2404e-05	-7.00335	-1
'y000004No1'	'(S)-lactate:ferricytochrome-c 2-oxidoreductase (No1)'	79.991	0.000215699	-5.56919	-0.999997
'arm_y000005'	'1,3-beta-glucan synthase (arm)'	70.4683	0.000167261	-5.6246	-0.999998
'y000005No1'	'1,3-beta-glucan synthase (No1)'	92.4896	0.000245326	-5.57635	-0.999997
'y000005No2'	'1,3-beta-glucan synthase (No2)'	89.6869	0.000347041	-5.41235	-0.999996
'y000007No1'	'1-(5-phosphoribosyl)-5-[(5-phosphoribosylamino)methylideneamino)imidazole-4-carboxamide isomerase (No1)'	87.049	0.000383011	-5.35655	-0.999996
'arm_y000008'	'1-acyl-sn-gylcerol-3-phosphate acyltransferase (arm)'	92.4896	0.000202105	-5.66052	-0.999998
'y000008No1'	'1-acyl-sn-gylcerol-3-phosphate acyltransferase (No1)'	89.6869	0.000213797	-5.62273	-0.999998
'y000008No2'	'1-acyl-sn-gylcerol-3-phosphate acyltransferase (No2)'	70.4683	0.000167261	-5.6246	-0.999998
'arm_y000009'	'1-acyl-sn-gylcerol-3-phosphate acyltransferase (arm)'	92.4896	0.000202105	-5.66052	-0.999998
'y000009No1'	'1-acyl-sn-gylcerol-3-phosphate acyltransferase (No1)'	89.6869	0.000213797	-5.62273	-0.999998
'y000009No2'	'1-acyl-sn-gylcerol-3-phosphate acyltransferase (No2)'	70.4683	0.000167261	-5.6246	-0.999998
'y000009No3'	'1-acyl-sn-gylcerol-3-phosphate acyltransferase (No3)'	84.5619	0.000427299	-5.29644	-0.999995
'y000010No1'	'1-phosphatidylinositol-3-phosphate 5-kinase (No1)'	2000	0.000161789	-7.09208	-1
'y000012No1'	'1-pyrroline-5-carboxylate dehydrogenase (No1)'	2000	9.76149e-05	-7.31151	-1
'y000013No1'	'2,3-diketo-5-methylthio-1-phosphopentane degradation reaction (No1)'	2000	0.000801439	-6.39716	-1
'y000014No1'	'2,5-diamino-6-ribitylamino-4(3H)-pyrimidinone 5''-phosphate deaminase (No1)'	2000	0.000232428	-6.93474	-1
'y000015No1'	'2,5-diamino-6-ribosylamino-4(3H)-pyrimidinone 5''-phosphate reductase (NADPH) (No1)'	2000	0.000447826	-6.64992	-1
'arm_y000016'	'2-aceto-2-hydroxybutanoate synthase (arm)'	2000	0.000661675	-6.48039	-1
'y000016No1'	'2-aceto-2-hydroxybutanoate synthase (No1)'	2000	0.000161789	-7.09208	-1
'y000016No2'	'2-aceto-2-hydroxybutanoate synthase (No2)'	2000	9.76149e-05	-7.31151	-1
'y000017No1'	'2-amino-4-hydroxy-6-hydroxymethyldihydropteridine diphosphokinase (No1)'	2000	0.000801439	-6.39716	-1
'arm_y000018'	'2-aminoadipate transaminase (arm)'	2000	0.000232428	-6.93474	-1
'y000018No1'	'2-aminoadipate transaminase (No1)'	2000	0.000447826	-6.64992	-1
'y000018No2'	'2-aminoadipate transaminase (No2)'	2000	0.000661675	-6.48039	-1
'arm_y000020'	'2-deoxy-D-arabino-heptulosonate 7-phosphate synthetase (arm)'	2000	3.42679e-05	-7.76614	-1
'y000020No1'	'2-deoxy-D-arabino-heptulosonate 7-phosphate synthetase (No1)'	2000	3.42679e-05	-7.76614	-1
'y000027No1'	'2-methylcitrate dehydratase (No1)'	724.274	1.71237e-05	-7.62631	-1
'y000028No1'	'2-methylcitrate synthase (No1)'	724.274	1.71237e-05	-7.62631	-1
'y000029No1'	'2-oxo-4-methyl-3-carboxypentanoate decarboxylation (No1)'	724.274	0.000772281	-5.97213	-0.999999
'y000030No1'	'2-oxo-4-methyl-3-carboxypentanoate decarboxylation (No1)'	724.274	0.000213681	-6.53014	-1
'y000032No1'	'3'',5''-bisphosphate nucleotidase (No1)'	724.274	0.000684204	-6.02472	-0.999999
'arm_y000033'	'3'',5''-cyclic-nucleotide phosphodiesterase (arm)'	724.274	0.000640793	-6.05319	-0.999999
'y000033No1'	'3'',5''-cyclic-nucleotide phosphodiesterase (No1)'	379.146	4.92599e-05	-6.88631	-1
'y000033No2'	'3'',5''-cyclic-nucleotide phosphodiesterase (No2)'	230.196	2.47978e-05	-6.96768	-1
'y000034No1'	'3'',5''-cyclic-nucleotide phosphodiesterase (No1)'	164.985	1.65367e-05	-6.999	-1
'y000035No1'	'3'',5''-cyclic-nucleotide phosphodiesterase (No1)'	125	1.2404e-05	-7.00335	-1
'y000036No1'	'3'',5''-cyclic-nucleotide phosphodiesterase (No1)'	92.4896	0.000202105	-5.66052	-0.999998
'y000037No1'	'3'',5''-cyclic-nucleotide phosphodiesterase (No1)'	89.6869	0.000213797	-5.62273	-0.999998
'y000038No1'	'3,4-dihydroxy-2-butanone-4-phosphate synthase (No1)'	724.274	0.000640793	-6.05319	-0.999999
'y000039No1'	'3-dehydroquinate dehydratase (No1)'	1000	0.0100744	-4.99678	-0.99999
'y000040No1'	'3-dehydroquinate synthase (No1)'	89.6869	0.000213797	-5.62273	-0.999998
'y000041No1'	'3-dehydrosphinganine reductase (No1)'	724.274	0.000213681	-6.53014	-1
'arm_y000042'	'3-deoxy-D-arabino-heptulosonate 7-phosphate synthetase (arm)'	724.274	0.000640793	-6.05319	-0.999999
'y000042No1'	'3-deoxy-D-arabino-heptulosonate 7-phosphate synthetase (No1)'	102.057	0.000194504	-5.71992	-0.999998
'y000042No2'	'3-deoxy-D-arabino-heptulosonate 7-phosphate synthetase (No2)'	102.057	0.000202105	-5.70327	-0.999998
'y000045No1'	'3-hydroxy-L-kynurenine hydrolase (No1)'	102.057	0.000213797	-5.67884	-0.999998
'y000057No1'	'3-hydroxyacyl-CoA dehydrogenase (3-oxotetradecanoyl-CoA) (No1)'	379.146	4.92599e-05	-6.88631	-1
'y000058No1'	'3-hydroxyanthranilate 3,4-dioxygenase (No1)'	230.196	2.47978e-05	-6.96768	-1
'y000060No1'	'3-isopropylmalate dehydratase (No1)'	164.985	1.65367e-05	-6.999	-1
'y000064No1'	'3-methyl-2-oxopentanoate decarboxylase (No1)'	102.057	0.000245326	-5.6191	-0.999998
'y000064No2'	'3-methyl-2-oxopentanoate decarboxylase (No2)'	102.057	0.000347041	-5.46846	-0.999997
'y000065No1'	'3-phosphoshikimate 1-carboxyvinyltransferase (No1)'	515.85	0.000383011	-6.12931	-0.999999
'y000066No1'	'4-amino-4-deoxychorismate synthase (No1)'	515.85	0.000427299	-6.08179	-0.999999
'y000068No1'	'4-aminobutyrate transaminase (No1)'	379.148	0.000616736	-5.78871	-0.999998
'y000069No1'	'4-hydroxy-L-threonine synthase (No1)'	125	1.2404e-05	-7.00335	-1
'y000072No1'	'4-methyl-2-oxopentanoate decarboxylase (No1)'	102.057	0.000194504	-5.71992	-0.999998
'arm_y000073'	'4PP-IP5 depyrophosphorylation to IP6 (arm)'	102.057	0.000202105	-5.70327	-0.999998
'y000073No1'	'4PP-IP5 depyrophosphorylation to IP6 (No1)'	102.057	0.000213797	-5.67884	-0.999998
'y000073No2'	'4PP-IP5 depyrophosphorylation to IP6 (No2)'	379.146	4.92599e-05	-6.88631	-1
'y000074No1'	'4PP-IP5 pyrophosphorylation to 4,5-PP2-IP4 (No1)'	230.196	2.47978e-05	-6.96768	-1
'y000075No1'	'5''-methylthioadenosine phosphorylase (No1)'	164.985	1.65367e-05	-6.999	-1
'y000080No2'	'5,10-methylenetetrahydrofolate reductase (NADPH) (No2)'	102.057	0.000245326	-5.6191	-0.999998
'y000081No1'	'5-aminolevulinate synthase (No1)'	102.057	0.000347041	-5.46846	-0.999997
'y000082No1'	'5-diphosphoinositol-1,2,3,4,6-pentakisphosphate diphosphohydrolase (No1)'	515.85	0.000427299	-6.08179	-0.999999
'y000083No1'	'5-diphosphoinositol-1,2,3,4,6-pentakisphosphate synthase (No1)'	379.148	0.000616736	-5.78871	-0.999998
'y000084No1'	'5-formethyltetrahydrofolate cyclo-ligase (No1)'	125	1.2404e-05	-7.00335	-1
'y000085No1'	'5-methyltetrahydropteroyltriglutamate-homocysteine S-methyltransferase (No1)'	102.057	0.000194504	-5.71992	-0.999998
'y000086No1'	'5-methylthio-5-deoxy-D-ribulose 1-phosphate dehydratase (No1)'	102.057	0.000202105	-5.70327	-0.999998
'y000087No1'	'5-methylthioribose-1-phosphate isomerase (No1)'	102.057	0.000213797	-5.67884	-0.999998
'y000090No1'	'6-phosphofructo-2-kinase (No1)'	379.146	4.92599e-05	-6.88631	-1
'arm_y000091'	'6-phosphogluconolactonase (arm)'	230.196	2.47978e-05	-6.96768	-1
'y000091No1'	'6-phosphogluconolactonase (No1)'	164.985	1.65367e-05	-6.999	-1
'y000095No1'	'acetaldehyde condensation (No1)'	102.057	0.000194504	-5.71992	-0.999998
'y000095No2'	'acetaldehyde condensation (No2)'	102.057	0.000202105	-5.70327	-0.999998
'y000096No1'	'acetohydroxy acid isomeroreductase (No1)'	102.057	0.000213797	-5.67884	-0.999998
'arm_y000097'	'acetolactate synthase (arm)'	379.146	4.92599e-05	-6.88631	-1
'y000097No1'	'acetolactate synthase (No1)'	230.196	2.47978e-05	-6.96768	-1
'y000097No2'	'acetolactate synthase (No2)'	164.985	1.65367e-05	-6.999	-1
'y000107No1'	'acetyl-CoA C-acyltransferase (decanoyl-CoA) (No1)'	1999.6	0.399049	-3.69992	-0.9998
'y000108No1'	'acetyl-Coa carboxylase (No1)'	1000	0.000215699	-6.66615	-1
'y000109No1'	'acetyl-CoA carboxylase, reaction (No1)'	1000	0.000645486	-6.19011	-0.999999
'y000123No1'	'acyl-CoA oxidase (hexadecanoyl-CoA) (No1)'	796.474	4.96341e-05	-7.20539	-1
'y000124No1'	'acyl-CoA oxidase (octadecanoyl-CoA) (No1)'	1296.47	0.000116392	-7.04684	-1
'y000125No1'	'acyl-CoA oxidase (tetradecanoyl-CoA) (No1)'	2000	0.00114088	-6.24379	-0.999999
'y000127No1'	'acyl-CoA:sterol acyltransferase (oleoyl-CoA:ergosterol), ER membrane (No1)'	2000	0.000232428	-6.93474	-1
'y000132No1'	'acyl-CoA:sterol acyltransferase (palmitoleoyl-CoA:ergosterol), ER membrane (No1)'	2000	0.000486827	-6.61366	-1
'y000137No1'	'acylation of GPI inositol at 2 position, GPI-anchor assembly, step 3 (No1)'	2000	0.000661675	-6.48039	-1
'y000139No1'	'adenine phosphoribosyltransferase (No1)'	500	5.10942e-05	-6.9906	-1
'y000142No1'	'adenosine kinase (No1)'	2000	0.000112154	-7.25121	-1
'y000143No1'	'adenosine monophosphate deaminase (No1)'	2000	8.04809e-05	-7.39534	-1
'y000144No1'	'adenosylhomocysteinase (No1)'	2000	0.000356577	-6.74888	-1
'y000145No1'	'adenosylmethionine decarboxylase (No1)'	2000	0.000232428	-6.93474	-1
'y000147No1'	'adenylate cyclase (No1)'	2000	9.00951e-05	-7.34633	-1
'y000148No1'	'adenylate kinase (No1)'	2000	0.0169564	-5.0717	-0.999992
'y000149No1'	'adenylate kinase (No1)'	379.146	4.92599e-05	-6.88631	-1
'y000150No1'	'adenylate kinase (GTP) (No1)'	230.196	2.47978e-05	-6.96768	-1
'y000153No1'	'adenylosuccinate synthase (No1)'	2000	0.0243435	-4.91465	-0.999988
'y000154No1'	'adenylyl-sulfate kinase (No1)'	1454.3	0.0253197	-4.7592	-0.999983
'y000155No1'	'ADP-ribose 2,3-cyclic phosphodiesterase (No1)'	500	5.10942e-05	-6.9906	-1
'y000157No1'	'alanyl-tRNA synthetase (No1)'	1000	0.000102188	-6.9906	-1
'y000163No1'	'alcohol dehydrogenase (ethanol to acetaldehyde) (No1)'	1000	0.000102188	-6.9906	-1
'arm_y000164'	'alcohol dehydrogenase (glycerol, NADP) (arm)'	79.991	0.000215699	-5.56919	-0.999997
'y000164No1'	'alcohol dehydrogenase (glycerol, NADP) (No1)'	79.991	0.000215699	-5.56919	-0.999997
'y000164No2'	'alcohol dehydrogenase (glycerol, NADP) (No2)'	79.991	0.000215699	-5.56919	-0.999997
'y000164No3'	'alcohol dehydrogenase (glycerol, NADP) (No3)'	452.686	0.0133318	-4.53091	-0.999971
'y000164No6'	'alcohol dehydrogenase (glycerol, NADP) (No6)'	1000	0.0144478	-4.8402	-0.999986
'y000164No7'	'alcohol dehydrogenase (glycerol, NADP) (No7)'	999.992	0.0120639	-4.91851	-0.999988
'y000164No8'	'alcohol dehydrogenase (glycerol, NADP) (No8)'	999.992	0.0120639	-4.91851	-0.999988
'y000164No9'	'alcohol dehydrogenase (glycerol, NADP) (No9)'	724.277	0.000177427	-6.61088	-1
'y000165No1'	'mitochondrial alcohol dehydrogenase (No1)'	724.277	0.000177427	-6.61088	-1
'arm_y000168'	'aldehyde dehydrogenase (2-methylbutanol, NADP) (arm)'	116.066	1.21615e-05	-6.97972	-1
'y000168No1'	'aldehyde dehydrogenase (2-methylbutanol, NADP) (No1)'	2.01741e-07	1.00853e-07	-0.301104	-0.500086
'y000168No2'	'aldehyde dehydrogenase (2-methylbutanol, NADP) (No2)'	348.197	3.64845e-05	-6.97972	-1
'y000168No3'	'aldehyde dehydrogenase (2-methylbutanol, NADP) (No3)'	348.197	3.64845e-05	-6.97972	-1
'y000168No9'	'aldehyde dehydrogenase (2-methylbutanol, NADP) (No9)'	434.566	2.985e-05	-7.16311	-1
'y000169No1'	'aldehyde dehydrogenase (2-phenylethanol, NAD) (No1)'	2000	0.000977871	-6.31075	-1
'y000170No1'	'aldehyde dehydrogenase (2-phenylethanol, NAD) (No1)'	2000	0.000232833	-6.93398	-1
'arm_y000172'	'aldehyde dehydrogenase (3-aminopropanal, NAD) (arm)'	2000	0.000486827	-6.61366	-1
'y000172No1'	'aldehyde dehydrogenase (3-aminopropanal, NAD) (No1)'	2000	0.000662548	-6.47981	-1
'y000172No2'	'aldehyde dehydrogenase (3-aminopropanal, NAD) (No2)'	2000	0.000112154	-7.25121	-1
'y000172No3'	'aldehyde dehydrogenase (3-aminopropanal, NAD) (No3)'	2000	8.04809e-05	-7.39534	-1
'y000172No4'	'aldehyde dehydrogenase (3-aminopropanal, NAD) (No4)'	2000	0.00680227	-5.46838	-0.999997
'arm_y000173'	'aldehyde dehydrogenase (acetaldehyde, NADP) (arm)'	2000	0.000232428	-6.93474	-1
'y000173No1'	'aldehyde dehydrogenase (acetaldehyde, NADP) (No1)'	2000	0.00176098	-6.05528	-0.999999
'y000173No2'	'aldehyde dehydrogenase (acetaldehyde, NADP) (No2)'	2000	0.0169564	-5.0717	-0.999992
'y000173No3'	'aldehyde dehydrogenase (acetaldehyde, NADP) (No3)'	452.686	0.026665	-4.22986	-0.999941
'y000173No4'	'aldehyde dehydrogenase (acetaldehyde, NADP) (No4)'	444.564	0.0133084	-4.52381	-0.99997
'arm_y000174'	'aldehyde dehydrogenase (acetylaldehyde, NAD) (arm)'	444.564	0.0133084	-4.52381	-0.99997
'y000174No1'	'aldehyde dehydrogenase (acetylaldehyde, NAD) (No1)'	444.564	0.0133084	-4.52381	-0.99997
'arm_y000175'	'aldehyde dehydrogenase (acetylaldehyde, NADP) (arm)'	1000	0.00151934	-5.81834	-0.999998
'y000175No1'	'aldehyde dehydrogenase (acetylaldehyde, NADP) (No1)'	452.671	4.84325e-05	-6.97065	-1
'arm_y000176'	'aldehyde dehydrogenase (indole-3-acetaldehyde, NAD) (arm)'	1000	0.0013676	-5.86404	-0.999999
'y000176No1'	'aldehyde dehydrogenase (indole-3-acetaldehyde, NAD) (No1)'	1000	0.0013676	-5.86404	-0.999999
'y000176No2'	'aldehyde dehydrogenase (indole-3-acetaldehyde, NAD) (No2)'	1000	0.0013676	-5.86404	-0.999999
'y000176No3'	'aldehyde dehydrogenase (indole-3-acetaldehyde, NAD) (No3)'	1000	0.00103263	-5.98605	-0.999999
'y000176No4'	'aldehyde dehydrogenase (indole-3-acetaldehyde, NAD) (No4)'	1000	0.00103263	-5.98605	-0.999999
'y000178No3'	'aldehyde dehydrogenase (indole-3-acetaldehyde, NADP) (No3)'	2000	3.42679e-05	-7.76614	-1
'y000178No4'	'aldehyde dehydrogenase (indole-3-acetaldehyde, NADP) (No4)'	2000	3.42679e-05	-7.76614	-1
'y000179No1'	'aldehyde dehydrogenase (isoamyl alcohol, NAD) (No1)'	1000	0.0217785	-4.66197	-0.999978
'y000180No1'	'aldehyde dehydrogenase (isoamyl alcohol, NAD) (No1)'	1000	0.0217785	-4.66197	-0.999978
'y000182No1'	'aldehyde dehydrogenase (isobutyl alcohol, NAD) (No1)'	1116.07	0.0218133	-4.70897	-0.99998
'y000183No1'	'aldehyde dehydrogenase (isobutyl alcohol, NAD) (No1)'	1000	0.0217785	-4.66197	-0.999978
'arm_y000185'	'aldehyde dehydrogenase (phenylacetaldehyde, NAD) (arm)'	1000	0.0217785	-4.66197	-0.999978
'y000185No1'	'aldehyde dehydrogenase (phenylacetaldehyde, NAD) (No1)'	116.072	3.47891e-05	-6.52329	-1
'y000185No2'	'aldehyde dehydrogenase (phenylacetaldehyde, NAD) (No2)'	1000	0.0217785	-4.66197	-0.999978
'y000185No3'	'aldehyde dehydrogenase (phenylacetaldehyde, NAD) (No3)'	1000	0.0217785	-4.66197	-0.999978
'y000185No4'	'aldehyde dehydrogenase (phenylacetaldehyde, NAD) (No4)'	1116.07	0.0218133	-4.70897	-0.99998
'y000186No1'	'aldehyde dehydrogenase (tryptophol, NAD) (No1)'	116.072	3.47891e-05	-6.52329	-1
'y000187No1'	'aldehyde dehydrogenase (tryptophol, NAD) (No1)'	1000	0.0217785	-4.66197	-0.999978
'y000188No1'	'alkaline phosphatase (dihydroneopterin) (No1)'	1000	0.0217785	-4.66197	-0.999978
'y000189No1'	'allantoate amidinohydrolase (No1)'	1000	0.00238395	-5.6227	-0.999998
'y000190No1'	'allantoinase, reaction (No1)'	116.072	8.17397e-05	-6.1523	-0.999999
'y000192No1'	'alpha 1,2-mannosyltransferase (No1)'	2000	0.000259595	-6.88673	-1
'y000192No2'	'alpha 1,2-mannosyltransferase (No2)'	2000	9.94721e-05	-7.30333	-1
'y000201No1'	'Aminobutyraldehyde dehydrogenase (No1)'	1000	0.000215699	-6.66615	-1
'y000201No2'	'Aminobutyraldehyde dehydrogenase (No2)'	1000	0.00112371	-5.94935	-0.999999
'y000209No1'	'arginyl-tRNA synthetase (No1)'	2000	3.42679e-05	-7.76614	-1
'y000210No1'	'arginyl-tRNA synthetase (No1)'	2000	3.42679e-05	-7.76614	-1
'y000213No1'	'asparaginyl-tRNA synthetase, miotchondrial (No1)'	935.805	5.34416e-05	-7.24331	-1
'y000214No1'	'aspartate carbamoyltransferase (No1)'	935.805	5.34416e-05	-7.24331	-1
'arm_y000216'	'aspartate transaminase (arm)'	1000	3.71742e-05	-7.42976	-1
'y000216No1'	'aspartate transaminase (No1)'	616.072	0.00239611	-5.41012	-0.999996
'y000216No2'	'aspartate transaminase (No2)'	4.71852e-08	2.35817e-08	-0.30123	-0.50023
'arm_y000217'	'aspartate transaminase (arm)'	500	0.00119197	-5.6227	-0.999998
'y000217No1'	'aspartate transaminase (No1)'	500	0.00119197	-5.6227	-0.999998
'y000217No2'	'aspartate transaminase (No2)'	500	0.00119197	-5.6227	-0.999998
'arm_y000218'	'aspartate transaminase (arm)'	500	0.00119197	-5.6227	-0.999998
'y000221No1'	'Aspartyl-tRNA synthetase (No1)'	1456.46	0.00571925	-5.40596	-0.999996
'y000228No1'	'beta-1,4 mannosyltransferase (No1)'	999.822	0.000352342	-6.45296	-1
'y000230No1'	'biotin-[acetyl-CoA-carboxylase] ligase (No1)'	999.992	0.0120639	-4.91851	-0.999988
'y000231No1'	'C-14 sterol reductase (No1)'	500	0.00119197	-5.6227	-0.999998
'y000236No1'	'C-3 sterol keto reductase (4-methylzymosterol) (No1)'	1951	4.32442e-06	-8.65433	-1
'y000237No1'	'C-3 sterol keto reductase (zymosterol) (No1)'	1434.57	4.17949e-06	-8.5356	-1
'y000238No1'	'C-4 methyl sterol oxidase (No1)'	951	2.18745e-05	-7.63824	-1
'y000239No1'	'C-4 methyl sterol oxidase (No1)'	434.566	2.985e-05	-7.16311	-1
'y000252No1'	'carnitine O-acetyltransferase (No1)'	500	0.00119197	-5.6227	-0.999998
'y000253No1'	'carnitine O-acetyltransferase (No1)'	500	0.000306974	-6.21187	-0.999999
'y000254No1'	'carnitine O-acetyltransferase (No1)'	500	0.000306974	-6.21187	-0.999999
'arm_y000255'	'catalase (arm)'	1000	0.000377509	-6.42307	-1
'y000255No1'	'catalase (No1)'	1000	0.000377509	-6.42307	-1
'y000255No2'	'catalase (No2)'	1000	0.00103263	-5.98605	-0.999999
'y000255No3'	'catalase (No3)'	1000	0.00103263	-5.98605	-0.999999
'arm_y000256'	'catalase (arm)'	1000	0.0013676	-5.86404	-0.999999
'y000256No1'	'catalase (No1)'	1000	0.000926052	-6.03336	-0.999999
'y000256No2'	'catalase (No2)'	500	0.000306974	-6.21187	-0.999999
'y000256No3'	'catalase (No3)'	500	0.000306974	-6.21187	-0.999999
'y000257No1'	'CDP-diacylglycerol synthase (No1)'	1000	0.000477415	-6.3211	-1
'y000258No1'	'CDP-diacylglycerol synthase (No1)'	1000	0.000477415	-6.3211	-1
'y000259No1'	'ceramide-1 hydroxylase (24C) (No1)'	1000	0.00053838	-6.26891	-0.999999
'y000260No1'	'ceramide-1 hydroxylase (24C) (No1)'	1000	0.00744705	-5.12802	-0.999993
'y000261No1'	'ceramide-1 hydroxylase (26C) (No1)'	1000	0.0217785	-4.66197	-0.999978
'y000262No1'	'ceramide-1 hydroxylase (26C) (No1)'	1000	0.0217785	-4.66197	-0.999978
'y000266No1'	'ceramide-2 synthase (26C) (No1)'	452.671	4.84325e-05	-6.97065	-1
'y000268No1'	'ceramide-3 synthase (26C) (No1)'	452.671	4.84325e-05	-6.97065	-1
'y000269No1'	'ceramide-4 synthase (24C) (No1)'	1000	0.000929258	-6.03186	-0.999999
'y000270No1'	'ceramide-4 synthase (26C) (No1)'	951.001	2.985e-05	-7.50324	-1
'y000271No1'	'chitin deacetylase (No1)'	951.001	0.000929258	-6.01004	-0.999999
'arm_y000272'	'chitin synthase (arm)'	1000	0.0217785	-4.66197	-0.999978
'y000272No1'	'chitin synthase (No1)'	1000	0.0217785	-4.66197	-0.999978
'y000272No2'	'chitin synthase (No2)'	1979.9	0.00355334	-5.74601	-0.999998
'y000272No3'	'chitin synthase (No3)'	1000	0.00103263	-5.98605	-0.999999
'y000272No4'	'chitin synthase (No4)'	1979.9	0.00355334	-5.74601	-0.999998
'y000272No5'	'chitin synthase (No5)'	1500	0.000839435	-6.2521	-0.999999
'y000272No6'	'chitin synthase (No6)'	2000	0.00151005	-6.12204	-0.999999
'y000272No7'	'chitin synthase (No7)'	500	0.00036202	-6.14024	-0.999999
'y000274No1'	'choline phosphate cytididyltransferase (No1)'	500	0.000306974	-6.21187	-0.999999
'y000278No1'	'chorismate mutase (No1)'	500	0.00119197	-5.6227	-0.999998
'y000279No1'	'chorismate synthase (No1)'	1951	2.16169e-06	-8.95546	-1
'arm_y000280'	'cis-aconitate(3-) to isocitrate (arm)'	951.001	2.985e-05	-7.50324	-1
'y000280No1'	'cis-aconitate(3-) to isocitrate (No1)'	1951	6.48752e-06	-8.47818	-1
'y000280No2'	'cis-aconitate(3-) to isocitrate (No2)'	951.001	2.985e-05	-7.50324	-1
'arm_y000281'	'cis-prenyltransferase step 01 (arm)'	1951	4.32479e-06	-8.65429	-1
'y000281No1'	'cis-prenyltransferase step 01 (No1)'	452.686	0.0257128	-4.24565	-0.999943
'y000281No2'	'cis-prenyltransferase step 01 (No2)'	500	0.00119197	-5.6227	-0.999998
'arm_y000282'	'cis-prenyltransferase step 02 (arm)'	116.072	8.17397e-05	-6.1523	-0.999999
'y000282No1'	'cis-prenyltransferase step 02 (No1)'	116.072	8.17397e-05	-6.1523	-0.999999
'y000283No2'	'cis-prenyltransferase step 03 (No2)'	1000	0.000377509	-6.42307	-1
'arm_y000284'	'cis-prenyltransferase step 04 (arm)'	116.072	3.47891e-05	-6.52329	-1
'y000284No1'	'cis-prenyltransferase step 04 (No1)'	116.072	3.47891e-05	-6.52329	-1
'arm_y000285'	'cis-prenyltransferase step 05 (arm)'	1000	0.000377509	-6.42307	-1
'y000285No1'	'cis-prenyltransferase step 05 (No1)'	116.072	3.47891e-05	-6.52329	-1
'y000285No2'	'cis-prenyltransferase step 05 (No2)'	116.072	3.47891e-05	-6.52329	-1
'arm_y000286'	'cis-prenyltransferase step 06 (arm)'	1000	0.000377509	-6.42307	-1
'y000286No1'	'cis-prenyltransferase step 06 (No1)'	1750	0.00170099	-6.01234	-0.999999
'y000286No2'	'cis-prenyltransferase step 06 (No2)'	724.277	0.000177427	-6.61088	-1
'y000287No2'	'cis-prenyltransferase step 07 (No2)'	724.277	0.000177427	-6.61088	-1
'arm_y000288'	'cis-prenyltransferase step 08 (arm)'	2000	0.00190598	-6.02091	-0.999999
'y000288No1'	'cis-prenyltransferase step 08 (No1)'	1000	0.00053838	-6.26891	-0.999999
'y000288No2'	'cis-prenyltransferase step 08 (No2)'	500	0.00036202	-6.14024	-0.999999
'arm_y000289'	'cis-prenyltransferase step 09 (arm)'	1000	0.000377509	-6.42307	-1
'y000289No1'	'cis-prenyltransferase step 09 (No1)'	500	0.000306974	-6.21187	-0.999999
'y000289No2'	'cis-prenyltransferase step 09 (No2)'	164.385	0.0202219	-3.91004	-0.999877
'y000290No1'	'cis-prenyltransferase step 10 (No1)'	999.602	0.00681771	-5.16619	-0.999993
'y000291No2'	'cis-prenyltransferase step 11 (No2)'	1000	0.0100744	-4.99678	-0.99999
'arm_y000292'	'cis-prenyltransferase step 12 (arm)'	420.738	0.0144851	-4.46309	-0.999966
'y000292No1'	'cis-prenyltransferase step 12 (No1)'	444.564	0.0133084	-4.52381	-0.99997
'arm_y000293'	'cis-prenyltransferase step 13 (arm)'	1000	0.00233806	-5.63114	-0.999998
'y000293No1'	'cis-prenyltransferase step 13 (No1)'	1000	0.00233806	-5.63114	-0.999998
'y000293No2'	'cis-prenyltransferase step 13 (No2)'	1000	0.00233806	-5.63114	-0.999998
'arm_y000294'	'cis-prenyltransferase step 14 (arm)'	159.083	0.0200948	-3.89854	-0.999874
'y000296No2'	'cis-prenyltransferase step 16 (No2)'	2000	0.00397799	-5.70137	-0.999998
'arm_y000297'	'cis-prenyltransferase step 17 (arm)'	2000	0.00397465	-5.70173	-0.999998
'y000297No1'	'cis-prenyltransferase step 17 (No1)'	2000	0.00386019	-5.71442	-0.999998
'y000297No2'	'cis-prenyltransferase step 17 (No2)'	2000	0.00397465	-5.70173	-0.999998
'arm_y000298'	'cis-prenyltransferase step 18 (arm)'	2000	0.00386019	-5.71442	-0.999998
'y000298No1'	'cis-prenyltransferase step 18 (No1)'	2000	0.00397169	-5.70205	-0.999998
'y000298No2'	'cis-prenyltransferase step 18 (No2)'	2000	0.00397169	-5.70205	-0.999998
'arm_y000299'	'cis-prenyltransferase step 19 (arm)'	2000	0.0038066	-5.72049	-0.999998
'y000299No1'	'cis-prenyltransferase step 19 (No1)'	2000	0.0038066	-5.72049	-0.999998
'y000299No2'	'cis-prenyltransferase step 19 (No2)'	2000	0.00372286	-5.73015	-0.999998
'y000300No1'	'citrate synthase (No1)'	2000	0.00372286	-5.73015	-0.999998
'y000301No1'	'citrate synthase, peroxisomal (No1)'	2000	0.00357963	-5.74719	-0.999998
'arm_y000302'	'citrate to cis-aconitate(3-) (arm)'	2000	0.00391531	-5.70826	-0.999998
'y000302No1'	'citrate to cis-aconitate(3-) (No1)'	2000	0.00357963	-5.74719	-0.999998
'y000302No2'	'citrate to cis-aconitate(3-) (No2)'	2000	0.00391531	-5.70826	-0.999998
'y000304No1'	'coproporphyrinogen oxidase (O2 required) (No1)'	1000	3.34632	-2.47543	-0.996654
'y000307No1'	'CTP synthase (NH3) (No1)'	1000	3.36691	-2.47277	-0.996633
'y000309No1'	'cystathionine beta-synthase (No1)'	1000	3.34632	-2.47543	-0.996654
'arm_y000310'	'cystathionine g-lyase (arm)'	1.29769e-06	6.48846e-07	-0.30103	-0.5
'y000310No1'	'cystathionine g-lyase (No1)'	199	9.15464e-06	-7.33721	-1
'y000310No2'	'cystathionine g-lyase (No2)'	724.274	0.000201932	-6.5547	-1
'y000311No1'	'cystathionine gamma-synthase (No1)'	1724.27	0.0101543	-5.22995	-0.999994
'y000312No1'	'cysteine synthase (No1)'	1000	0.0100744	-4.99678	-0.99999
'y000313No1'	'cysteinyl-tRNA synthetase (No1)'	724.274	0.000201803	-6.55498	-1
'y000314No1'	'cytidine deaminase (No1)'	462.753	0.000840636	-5.74074	-0.999998
'y000317No1'	'cytochrome P450 lanosterol 14-alpha-demethylase (NADP) (No1)'	724.274	0.000201803	-6.55498	-1
'y000318No1'	'cytosine deaminase (No1)'	397.994	0.00649697	-4.78717	-0.999984
'y000319No1'	'D-arabinono-1,4-lactone oxidase (No1)'	1122.27	0.00649697	-5.23739	-0.999994
'y000321No1'	'D-arabinose 1-dehydrogenase (NADP) (No1)'	1000	3.34632	-2.47543	-0.996654
'y000321No2'	'D-arabinose 1-dehydrogenase (NADP) (No2)'	1000	3.34632	-2.47543	-0.996654
'y000321No3'	'D-arabinose 1-dehydrogenase (NADP) (No3)'	1000	3.34632	-2.47543	-0.996654
'y000321No7'	'D-arabinose 1-dehydrogenase (NADP) (No7)'	724.274	0.000201803	-6.55498	-1
'y000321No8'	'D-arabinose 1-dehydrogenase (NADP) (No8)'	500	0.0492471	-4.00659	-0.999902
'y000322No1'	'D-fructose 1-phosphate D-glyceraldehyde-3-phosphate-lyase (No1)'	340.708	0.0252302	-4.13046	-0.999926
'y000323No1'	'D-sorbitol dehydrogenase (D-fructose producing) (No1)'	164.317	2.54516e-05	-6.80997	-1
'y000326No1'	'dCMP deaminase (No1)'	164.317	2.54516e-05	-6.80997	-1
'y000327No1'	'dCTP deaminase (No1)'	164.317	2.54516e-05	-6.80997	-1
'y000329No1'	'deoxycytidine deaminase (No1)'	164.317	2.54516e-05	-6.80997	-1
'y000337No1'	'diacylglycerol pyrophosphate phosphatase (No1)'	1000	0.00962822	-5.01645	-0.99999
'y000337_1No1'	'diacylglycerol pyrophosphate phosphatase (No1)'	1000	0.00962822	-5.01645	-0.99999
'y000337_2No1'	'diacylglycerol pyrophosphate phosphatase (No1)'	1000	0.00962823	-5.01645	-0.99999
'y000348No1'	'dihydroneopterin monophosphate dephosphorylase (No1)'	1000	0.000344942	-6.46225	-1
'arm_y000354'	'dihydroxyacetone kinase (arm)'	1509.78	0.00229108	-5.81887	-0.999998
'y000354No2'	'dihydroxyacetone kinase (No2)'	1000	0.000344942	-6.46225	-1
'y000355No1'	'dimethylallyltranstransferase (No1)'	999.896	0.0106145	-4.97406	-0.999989
'y000356No1'	'diphosphoglyceromutase (No1)'	774.845	0.00317693	-5.38721	-0.999996
'y000357No1'	'diphosphoinositol-1,3,4,6-tetrakisphosphate diphosphohydrolase (No1)'	285.927	0.000120753	-6.37436	-1
'y000359No1'	'diphthine synthase (No1)'	999.945	0.00438307	-5.3582	-0.999996
'y000360No1'	'dolichol kinase (No1)'	1660.3	0.0176931	-4.97238	-0.999989
'y000361No1'	'dolichyl-phosphate D-mannosyltransferase (No1)'	1660.3	0.0176931	-4.97238	-0.999989
'y000364No1'	'dUTP diphosphatase (No1)'	999.963	0.0100792	-4.99656	-0.99999
'y000368No1'	'ethanolamine kinase (No1)'	1000	0.0108629	-4.96405	-0.999989
'y000373No1'	'farnesyltranstransferase (No1)'	999.886	0.0083661	-5.07743	-0.999992
'arm_y000381'	'fatty acid oxidation (C18:2) (arm)'	1000	0.00520546	-5.28354	-0.999995
'y000381No1'	'fatty acid oxidation (C18:2) (No1)'	1000	0.0137098	-4.86297	-0.999986
'y000381No2'	'fatty acid oxidation (C18:2) (No2)'	0.0107326	0.0107315	-4.34273e-05	-9.999e-05
'y000439No1'	'ubiquinol:ferricytochrome c reductase (No1)'	462.753	0.000840636	-5.74074	-0.999998
[truncated: 1 more rows]

[truncated: 3 more sheets: Yli_chemostat, Kmx_batch, Kmx_chemostat]
